# Supplementary material for: Gut Microbiome Metagenomics Analysis Suggests a Functional Model for the Development of Autoimmunity for Type 1 Diabetes
Source: PLoS One. 2011 Oct 17;6(10):e25792. doi: 10.1371/journal.pone.0025792 (PMC3197175; doi:10.1371/journal.pone.0025792)
Supplement: Supporting Dataset S2 — The percent of total reads for all functions identified in cases and controls. (XLSX) [file pone.0025792.s005.xlsx]

## Sheet: Sheet1
functions	p-value	q-value	average case percent of total reads	average control percent of total reads
Virulence	0.393955	0.606048	5.99435	5.07497
Virulence;Resistance to antibiotics and toxic compounds	0.581169	0.792672	3.66919	3.02831
Virulence;Resistance to antibiotics and toxic compounds;BlaR1_Family_Regulatory_Sensor-transducer_Disambiguation;Regulatory sensor-transducer, BlaR1/MecR1 family	0.994541	0.999985	2.02765	1.57449
Virulence;Resistance to antibiotics and toxic compounds;BlaR1_Family_Regulatory_Sensor-transducer_Disambiguation	0.821417	0.999985	2.20337	1.76855
Regulation and Cell signaling	0.374265	0.587498	2.44714	2.10658
Regulation and Cell signaling;cAMP_signaling_in_bacteria	0.632846	0.84343	1.8935	1.5678
Regulation and Cell signaling;cAMP_signaling_in_bacteria;Adenylate cyclase (EC 4.6.1.1)	0.832635	0.999985	1.60751	1.28742
Carbohydrates	0.00240263	0.0133712	7.71371	7.42601
Virulence;Iron Scavenging Mechanisms	0.277942	0.489611	1.55485	1.3417
# Column total	0.000287228	0.00227946	42.1927	41.9904
Carbohydrates;Di- and oligosaccharides	0.102344	0.243933	2.53244	2.36748
Phages, Prophages, Transposable elements	0.89056	0.999985	0.744839	0.58807
Virulence;Iron Scavenging Mechanisms;Iron_acquisition_in_Vibrio	0.735175	0.945751	0.726341	0.587147
Virulence;Iron Scavenging Mechanisms;Iron_acquisition_in_Vibrio;TonB-dependent receptor	0.73219	0.943356	0.725048	0.586316
Motility and Chemotaxis	0.86907	0.999985	0.639311	0.511481
Motility and Chemotaxis;Flagellar motility in Prokaryota	0.86907	0.999985	0.639311	0.511481
Motility and Chemotaxis;Flagellar motility in Prokaryota;Flagellum	0.875909	0.999985	0.636622	0.509053
Carbohydrates;Di- and oligosaccharides;Lactose_and_Galactose_Uptake_and_Utilization;Beta-galactosidase (EC 3.2.1.23)	0.403882	0.614119	0.96366	0.83662
Carbohydrates;Di- and oligosaccharides;Lactose_and_Galactose_Uptake_and_Utilization	0.289188	0.497801	1.08694	0.965099
Motility and Chemotaxis;Flagellar motility in Prokaryota;Flagellum;Flagellar hook-length control protein FliK	0.0249383	0.084496	0.333563	0.228291
Virulence;Resistance to antibiotics and toxic compounds;Multidrug_Resistance_Efflux_Pumps	0.964562	0.999985	0.473456	0.373394
Clustering-based subsystems;Biosynthesis of galactoglycans and related lipopolysacharides	0.452024	0.658781	0.603844	0.517664
Phages, Prophages, Transposable elements;Phage family-specific subsystems	0.848405	0.999985	0.190564	0.105178
Phages, Prophages, Transposable elements;Phage family-specific subsystems;r1t-like_streptococcal_phages	0.848405	0.999985	0.190564	0.105178
Clustering-based subsystems;Biosynthesis of galactoglycans and related lipopolysacharides;CBSS-258594.1.peg.3339	0.440363	0.64693	0.596671	0.512687
Carbohydrates;Aminosugars;N-Acetyl-Galactosamine_and_Galactosamine_Utilization;Beta-hexosaminidase (EC 3.2.1.52)	0.576172	0.788006	0.316049	0.233405
Carbohydrates;Aminosugars;N-Acetyl-Galactosamine_and_Galactosamine_Utilization	0.93052	0.999985	0.40268	0.320848
Carbohydrates;Di- and oligosaccharides;Fructooligosaccharides(FOS)_and_Raffinose_Utilization	0.403589	0.613998	0.72897	0.647852
Carbohydrates;Monosaccharides	4.10842e-05	0.000432058	1.91427	1.8337
Carbohydrates;Aminosugars	0.27694	0.488849	0.561169	0.484186
Virulence;Resistance to antibiotics and toxic compounds;Multidrug_Resistance_Efflux_Pumps;Acriflavin resistance protein	0.917421	0.999985	0.391735	0.316459
Protein Metabolism;Protein processing and modification	0.212801	0.40974	0.507007	0.434648
Carbohydrates;Monosaccharides;Mannose_Metabolism	0.843044	0.999985	0.326398	0.255876
Carbohydrates;Monosaccharides;Mannose_Metabolism;Alpha-1,2-mannosidase	0.737542	0.946898	0.29708	0.229956
Phages, Prophages, Transposable elements;Bacteriophage structural proteins	0.45808	0.665591	0.179556	0.113045
Protein Metabolism;Protein processing and modification;N-linked_Glycosylation_in_Bacteria	0.371213	0.584375	0.219884	0.155062
Clustering-based subsystems;Biosynthesis of galactoglycans and related lipopolysacharides;CBSS-258594.1.peg.3339;Glycosyltransferase	0.389258	0.602192	0.41983	0.36169
Phages, Prophages, Transposable elements;Phage family-specific subsystems;r1t-like_streptococcal_phages;Phage protein	0.424269	0.632244	0.076823	0.0201132
Carbohydrates;Di- and oligosaccharides;Fructooligosaccharides(FOS)_and_Raffinose_Utilization;Beta-glucosidase (EC 3.2.1.21)	0.770105	0.980852	0.400611	0.344833
Sulfur Metabolism	0.846011	0.999985	0.281903	0.228408
Virulence;Type III, Type IV, Type VI, ESAT secretion systems	0.232396	0.434643	0.39436	0.341088
Phages, Prophages, Transposable elements;Bacteriophage structural proteins;Phage_tail_proteins_2	0.834209	0.999985	0.154487	0.101846
Sulfur Metabolism;Galactosylceramide_and_Sulfatide_metabolism	0.294796	0.502734	0.16074	0.109722
Sulfur Metabolism;Galactosylceramide_and_Sulfatide_metabolism;Arylsulfatase (EC 3.1.6.1)	0.294796	0.502734	0.16074	0.109722
Phages, Prophages, Transposable elements;Bacteriophage structural proteins;Phage_tail_proteins_2;Phage tail length tape-measure protein	0.94416	0.999985	0.14261	0.0978716
Virulence;Iron Scavenging Mechanisms;Transport_of_Iron;Ferrichrome-iron receptor	0.0207526	0.0730801	0.071026	0.028753
Carbohydrates;Monosaccharides;L-fucose_utilization_temp	0.935998	0.999985	0.191261	0.150168
Virulence;Iron Scavenging Mechanisms;Iron_siderophore_sensor_&_receptor_system	0.660468	0.869406	0.141862	0.10094
Virulence;Iron Scavenging Mechanisms;Iron_siderophore_sensor_&_receptor_system;Iron siderophore sensor protein	0.660468	0.869406	0.141862	0.10094
Regulation and Cell signaling;Oxygen_and_light_sensor_PpaA-PpsR	0.342936	0.555306	0.113187	0.0749169
Regulation and Cell signaling;Oxygen_and_light_sensor_PpaA-PpsR;Phytochrome, two-component sensor histidine kinase (EC 2.7.3.-)	0.342936	0.555306	0.113187	0.0749169
Carbohydrates;Monosaccharides;L-fucose_utilization_temp;Alpha-L-fucosidase (EC 3.2.1.51)	0.04912	0.144338	0.122103	0.084099
Cell Wall and Capsule;Gram-Negative cell wall components	0.607914	0.819396	0.392386	0.354406
Clustering-based subsystems;EC49-61;DNA polymerase II (EC 2.7.7.7)	0.750717	0.959971	0.0412695	0.00617391
Cell Wall and Capsule;Gram-Negative cell wall components;Outer_membrane	0.790284	0.998622	0.164756	0.133018
Cell Wall and Capsule;Gram-Negative cell wall components;Outer_membrane;Outer membrane protein A precursor	0.299686	0.507922	0.096652	0.065519
Virulence;Iron Scavenging Mechanisms;Hemin_transport_system	0.32941	0.542532	0.103405	0.073314
Carbohydrates;Central carbohydrate metabolism;Dehydrogenase_complexes	0.11569	0.265977	0.0733315	0.0439434
Clustering-based subsystems;EC49-61	0.997252	0.999985	0.102582	0.0732581
Stress Response	3.60886e-09	1.05231e-07	0.436929	0.408299
Virulence;Resistance to antibiotics and toxic compounds;Multidrug_efflux_pump_in_Campylobacter_jejuni_(CmeABC_operon)	0.211532	0.408385	0.317684	0.289239
Phages, Prophages, Transposable elements;Phage family-specific subsystems;r1t-like_streptococcal_phages;Phage major capsid protein	0.380596	0.593323	0.0362055	0.0082471
Virulence;Resistance to antibiotics and toxic compounds;Multidrug_Resistance_Efflux_Pumps;Type I secretion outer membrane protein, TolC precursor	0.150079	0.320741	0.0765142	0.0485613
Carbohydrates;Di- and oligosaccharides;Fructooligosaccharides(FOS)_and_Raffinose_Utilization;Alpha-mannosidase (EC 3.2.1.24)	0.00642681	0.0296249	0.0588335	0.0309963
Virulence;Resistance to antibiotics and toxic compounds;Methicillin_resistance_in_Staphylococci	0.324196	0.536239	0.19426	0.166471
Nitrogen Metabolism;Nitrate_and_nitrite_ammonification	0.00153361	0.00923768	0.0447047	0.0180411
Cofactors, Vitamins, Prosthetic Groups, Pigments;Biotin	0.107461	0.252822	0.244811	0.218824
Cofactors, Vitamins, Prosthetic Groups, Pigments;Biotin;Biotin_biosynthesis	0.107461	0.252822	0.244811	0.218824
Virulence;Iron Scavenging Mechanisms;Hemin_transport_system;Haemin uptake system outer membrane receptor	0.0261025	0.0875161	0.0573474	0.0318456
Carbohydrates;CO2 fixation;CO2_uptake,_carboxysome;High-affnity carbon uptake protein Hat/HatR	0.199006	0.39301	0.0728929	0.0482394
Membrane Transport;Choline_Transport	0.57781	0.788929	0.137336	0.112758
Membrane Transport;Choline_Transport;Choline-sulfatase (EC 3.1.6.6)	0.57781	0.788929	0.137336	0.112758
Protein Metabolism;Protein processing and modification;N-linked_Glycosylation_in_Bacteria;UDP-N-acetylglucosamine 4,6-dehydratase (EC 4.2.1.-)	0.0765826	0.197168	0.0651426	0.0406693
Cell Wall and Capsule;Gram-Positive cell wall components;Teichuronic_acid_biosynthesis	0.145904	0.314085	0.075109	0.0509382
Clustering-based subsystems;Cytochrome biogenesis	0.68696	0.896613	0.0921102	0.0682178
Clustering-based subsystems;Cytochrome biogenesis;CBSS-196164.1.peg.461	0.68696	0.896613	0.0921102	0.0682178
Cell Wall and Capsule;Gram-Positive cell wall components;Teichuronic_acid_biosynthesis;UDP-glucose dehydrogenase (EC 1.1.1.22)	0.189939	0.379778	0.0721427	0.0484141
Virulence;Resistance to antibiotics and toxic compounds;Cobalt-zinc-cadmium_resistance	0.237157	0.440761	0.175159	0.151526
Protein Metabolism;Protein processing and modification;Inteins;intein-containing	0.391674	0.60423	0.164347	0.140864
Protein Metabolism;Protein processing and modification;Inteins	0.390408	0.603002	0.164364	0.140936
Regulation and Cell signaling;cAMP_signaling_in_bacteria;cAMP-binding proteins - catabolite gene activator and regulatory subunit of cAMP-dependent protein kinases	0.761972	0.972424	0.120096	0.0967973
Amino Acids and Derivatives;Glutamine, glutamate, aspartate, asparagine; ammonia assimilation;Glutamine,_Glutamate,_Aspartate_and_Asparagine_Biosynthesis;Aspartate ammonia-lyase (EC 4.3.1.1)	0.964476	0.999985	0.103349	0.0801923
Virulence;Type III, Type IV, Type VI, ESAT secretion systems;Type_III_secretion_system_orphans	0.933538	0.999985	0.119492	0.0963486
Virulence;Type III, Type IV, Type VI, ESAT secretion systems;Type_III_secretion_system_orphans;BarA sensory histidine kinase (= VarS = GacS)	0.933538	0.999985	0.119492	0.0963486
Protein Metabolism;Protein folding;Protein_chaperones;ClpB protein	0.855451	0.999985	0.106574	0.0845339
Stress Response;Oxidative stress	0.0613341	0.169229	0.175795	0.153808
Cell Division and Cell Cycle;Cell cycle in Prokaryota;Heterocyst_formation_in_cyanobacteria;Heterocyst differentiation protein HetC	0.152501	0.324149	0.0474113	0.0256261
Cell Division and Cell Cycle;Cell cycle in Prokaryota;Heterocyst_formation_in_cyanobacteria	0.15541	0.328126	0.0475166	0.0257927
Clustering-based subsystems;Biosynthesis of galactoglycans and related lipopolysacharides;CBSS-258594.1.peg.3339;Glycosyl transferase, group 1	0.130306	0.288341	0.0676948	0.0461354
Virulence;Resistance to antibiotics and toxic compounds;Multidrug_efflux_pump_in_Campylobacter_jejuni_(CmeABC_operon);RND efflux system, outer membrane lipoprotein CmeC	0.553133	0.765676	0.126693	0.105864
Phages, Prophages, Transposable elements;Listeria_phi-A118-like_prophages;Minor capsid protein [Bacteriophage A118]	0.417675	0.626025	0.0230954	0.00276958
Carbohydrates;Sugar alcohols;Glycerol_and_Glycerol-3-phosphate_Uptake_and_Utilization	0.344957	0.557276	0.121311	0.101239
Amino Acids and Derivatives;Histidine Metabolism;Histidine_Degradation	0.261217	0.470264	0.0618935	0.0428155
Virulence;Iron Scavenging Mechanisms;Transport_of_Iron	0.276158	0.488031	0.168358	0.149361
Virulence;Streptococcus_pyogenes_Virulome;Hyaluronate lyase precursor (EC 4.2.2.1)	0.030922	0.0997644	0.027249	0.00827108
Clustering-based subsystems;Cytochrome biogenesis;CBSS-196164.1.peg.461;Thiol:disulfide oxidoreductase related to ResA	0.986637	0.999985	0.077667	0.0592104
Protein Metabolism;Protein processing and modification;N-linked_Glycosylation_in_Bacteria;UDP-glucose 4-epimerase (EC 5.1.3.2)	0.865546	0.999985	0.0758332	0.0583633
Membrane Transport;Uni- Sym- and Antiporters	0.135626	0.297737	0.0502448	0.0327978
Carbohydrates;Sugar alcohols	0.00113226	0.00720342	0.419518	0.402221
Phages, Prophages, Transposable elements;Listeria_phi-A118-like_prophages	0.873275	0.999985	0.0358549	0.018629
Stress Response;Oxidative stress;Protection_from_Reactive_Oxygen_Species	0.0045011	0.0218837	0.0296454	0.0126104
Stress Response;Osmotic stress	0.216504	0.414589	0.0388212	0.0220105
Cofactors, Vitamins, Prosthetic Groups, Pigments;Biotin;Biotin_biosynthesis;Long-chain-fatty-acid--CoA ligase (EC 6.2.1.3)	0.445018	0.652179	0.12725	0.110582
Respiration;Electron donating reactions	0.196999	0.389846	0.180756	0.164208
Virulence;Resistance to antibiotics and toxic compounds;Cobalt-zinc-cadmium_resistance;Cation efflux system protein CusA	0.592123	0.804761	0.0611606	0.0446296
Carbohydrates;Di- and oligosaccharides;Fructooligosaccharides(FOS)_and_Raffinose_Utilization;Alpha-galactosidase (EC 3.2.1.22)	0.508493	0.71929	0.134463	0.118094
Virulence;Adhesion	0	0	0.0260991	0.00983168
Virulence;Resistance to antibiotics and toxic compounds;The_mdtABCD_multidrug_resistance_cluster	0.649261	0.857586	0.0669561	0.0508777
Virulence;Resistance to antibiotics and toxic compounds;The_mdtABCD_multidrug_resistance_cluster;Probable RND efflux membrane fusion protein	0.649261	0.857586	0.0669561	0.0508777
Amino Acids and Derivatives;Histidine Metabolism	0.292316	0.501168	0.178705	0.163099
Clustering-based subsystems;CBSS-393124.3.peg.2657	0.0118413	0.048077	0.173422	0.158104
Cell Wall and Capsule;Capsular and extracellular polysacchrides;Sialic_Acid_Metabolism;UDP-N-acetylglucosamine 2-epimerase (EC 5.1.3.14)	0.0683529	0.182322	0.0404097	0.0252493
Clustering-based subsystems;CBSS-393124.3.peg.2657;ADA regulatory protein	0.0113276	0.0462355	0.161904	0.146836
Motility and Chemotaxis;Flagellar motility in Prokaryota;Flagellum;RNA polymerase sigma-54 factor RpoN	0.0221742	0.077099	0.109883	0.0948999
Respiration;Electron donating reactions;Respiratory_Complex_I	0.314801	0.525671	0.0510657	0.0363208
Amino Acids and Derivatives;Glutamine, glutamate, aspartate, asparagine; ammonia assimilation;Glutamine,_Glutamate,_Aspartate_and_Asparagine_Biosynthesis	0.0266785	0.0891369	0.470663	0.456025
Stress Response;Osmotic stress;Choline_and_Betaine_Uptake_and_Betaine_Biosynthesis	0.115681	0.265977	0.0326809	0.0183425
Virulence;Type III, Type IV, Type VI, ESAT secretion systems;Type_VI_secretion_systems	0.0519772	0.150178	0.0261496	0.011825
Virulence;Type III, Type IV, Type VI, ESAT secretion systems;Type_IV_pilus;Type IV fimbrial biogenesis protein PilY1	0.927823	0.999985	0.0610192	0.0469825
Protein Metabolism;Protein folding	0.110941	0.258794	0.381604	0.367626
Virulence;Adhesion;The_fimbrial_Sfm_cluster	0.980249	0.999985	0.0138719	0
Clustering-based subsystems;CBSS-176280.1.peg.1561	0.204058	0.398565	0.133485	0.119712
RNA Metabolism;Transcription;Transcription_initiation,_bacterial_sigma_factors;RNA polymerase sigma-70 factor	0.40117	0.613226	0.0904165	0.0767207
Carbohydrates;Monosaccharides;L-Arabinose_utilization;Arabinose-proton symporter	0.0162702	0.0610701	0.026708	0.0130602
Virulence;Resistance to antibiotics and toxic compounds;Beta-lactamase	0.19091	0.381324	0.0947014	0.0810554
Cell Wall and Capsule;Capsular and extracellular polysacchrides;Exopolysaccharide_Biosynthesis;Glycosyl transferase, group 2 family protein	0.172578	0.352762	0.202618	0.189109
Carbohydrates;One-carbon Metabolism;Serine-glyoxylate_cycle;Methylmalonyl-CoA mutase (EC 5.4.99.2)	0.412576	0.621528	0.0449139	0.0314118
Phages, Prophages, Transposable elements;Bacteriophage structural proteins;Phage_tail_fiber_proteins	0.152766	0.324149	0.0245395	0.0111993
Phages, Prophages, Transposable elements;Phage_packaging_machinery	3.43272e-07	6.54086e-06	0.0192433	0.00623328
Amino Acids and Derivatives;Branched-chain amino acids;Valine_degradation	0.211567	0.408385	0.0360122	0.0233017
Carbohydrates;Sugar alcohols;Glycerol_and_Glycerol-3-phosphate_Uptake_and_Utilization;Glycerophosphoryl diester phosphodiesterase (EC 3.1.4.46)	0.920313	0.999985	0.0558398	0.0432139
Virulence;Type III, Type IV, Type VI, ESAT secretion systems;Type_VI_secretion_systems;VgrG protein	0.0897441	0.221143	0.0241197	0.0115099
Clustering-based subsystems;CBSS-211586.1.peg.3133	0.00846781	0.0369112	0.0251138	0.0125168
Carbohydrates;Monosaccharides;L-Arabinose_utilization;Alpha-L-arabinofuranosidase II precursor (EC 3.2.1.55)	0.40428	0.614119	0.104739	0.0921589
Amino Acids and Derivatives;Alanine, serine, and glycine;Glycine_cleavage_system	0.90584	0.999985	0.0668926	0.0543391
Phages, Prophages, Transposable elements;Bacteriophage structural proteins;Phage_tail_fiber_proteins;Phage tail fiber protein	0.0994095	0.239741	0.0218474	0.00945152
Protein Metabolism;Protein processing and modification;N-linked_Glycosylation_in_Bacteria;4-keto-6-deoxy-N-Acetyl-D-hexosaminyl-(Lipid carrier) aminotransferase	0.618968	0.829241	0.0482712	0.0360034
Clustering-based subsystems;CBSS-211586.1.peg.3133;Protein-L-isoaspartate O-methyltransferase (EC 2.1.1.77)	0.0165474	0.0618958	0.0167516	0.00481081
Phages, Prophages, Transposable elements;Phage_packaging_machinery;Phage terminase, large subunit	7.18085e-05	0.000703284	0.0175466	0.0056636
Carbohydrates;Central carbohydrate metabolism;TCA_Cycle;Putative Dihydrolipoamide dehydrogenase (EC 1.8.1.4)	0.019208	0.0691597	0.0189778	0.00717055
Virulence;Quorum sensing and biofilm formation;Quorum-sensing_in_Vibrio	0.0117552	0.0477781	0.0212039	0.00950289
Virulence;Adhesion;The_fimbrial_Sfm_cluster;Outer membrane usher protein SfmD	0.979705	0.999985	0.0114755	0
Amino Acids and Derivatives;Alanine, serine, and glycine;Glycine_cleavage_system;Glycine dehydrogenase [decarboxylating] (glycine cleavage system P protein) (EC 1.4.4.2)	0.177787	0.361108	0.0294708	0.0180742
Virulence;Quorum sensing and biofilm formation;Quorum-sensing_in_Vibrio;Autoinducer 2 sensor kinase/phosphatase LuxQ (EC 2.7.3.-) (EC 3.1.3.-)	0.00790356	0.0349263	0.0208187	0.00942983
DNA Metabolism;DNA repair;DNA_repair,_bacterial_RecBCD_pathway;RecD-like DNA helicase Atu2026	0.690421	0.900518	0.0524205	0.041433
Virulence;Resistance to antibiotics and toxic compounds;Methicillin_resistance_in_Staphylococci;Undecaprenyl-phosphate N-acetylglucosaminyl 1-phosphate transferase (EC 2.7.8.-)	0.331813	0.544858	0.0328021	0.0219478
Secondary Metabolism	0.137123	0.299709	0.0262175	0.0154987
Membrane Transport;Uni- Sym- and Antiporters;Proton-dependent_Peptide_Transporters	0.363935	0.57693	0.033952	0.0232401
Membrane Transport;Uni- Sym- and Antiporters;Proton-dependent_Peptide_Transporters;Di/tripeptide permease YbgH	0.363935	0.57693	0.033952	0.0232401
Fatty Acids, Lipids, and Isoprenoids;Fatty acids;Fatty_Acid_Biosynthesis_FASII	0.223383	0.423941	0.101318	0.0906325
Virulence;Resistance to antibiotics and toxic compounds;Multidrug_efflux_pump_in_Campylobacter_jejuni_(CmeABC_operon);RND efflux system, membrane fusion protein CmeA	0.520347	0.730066	0.0799869	0.069428
Carbohydrates;Sugar alcohols;Glycerol_and_Glycerol-3-phosphate_Uptake_and_Utilization;Glycerol-3-phosphate transporter	0.0619337	0.170395	0.0176591	0.0072927
Cofactors, Vitamins, Prosthetic Groups, Pigments;Folate and pterines;Folate_Biosynthesis;Thymidylate synthase thyX (EC 2.1.1.-)	0.925477	0.999985	0.0147044	0.00440439
Phosphorus Metabolism;Phosphate_metabolism;Inorganic pyrophosphatase (EC 3.6.1.1)	0.231041	0.432647	0.0290928	0.0188186
Miscellaneous;ZZ_gjo_need_homes;Na+/H+ antiporter	0.333824	0.546064	0.0276674	0.0173995
Nucleosides and Nucleotides;Pyrimidines;pyrimidine_conversions;2',3'-cyclic-nucleotide 2'-phosphodiesterase (EC 3.1.4.16)	0.381891	0.594619	0.0316797	0.0214888
Virulence;Resistance to antibiotics and toxic compounds;Beta-lactamase;Beta-lactamase class C and other penicillin binding proteins	0.594565	0.807444	0.0413186	0.0312337
Cofactors, Vitamins, Prosthetic Groups, Pigments;Biotin;Biotin_biosynthesis;Biotin synthase (EC 2.8.1.6)	0.159738	0.333784	0.0248555	0.0148092
Fatty Acids, Lipids, and Isoprenoids;Fatty acids	0.129342	0.286608	0.152091	0.142076
Carbohydrates;Sugar alcohols;Inositol_catabolism;Myo-inositol 2-dehydrogenase (EC 1.1.1.18)	0.641457	0.851956	0.0932384	0.083245
Plant-Prokaryote DOE project;Experimental-Ubiquinone_BiosynthesisVDC	0.180303	0.36564	0.0339678	0.0240346
RNA Metabolism;Transcription;Transcription_initiation,_bacterial_sigma_factors	0.00782578	0.0346223	0.118654	0.10875
Carbohydrates;Di- and oligosaccharides;Maltose_and_Maltodextrin_Utilization;Maltose phosphorylase (EC 2.4.1.8)	0.0849551	0.212071	0.0212934	0.0114003
Regulation and Cell signaling;cAMP_signaling_in_bacteria;3',5'-cyclic-nucleotide phosphodiesterase (EC 3.1.4.17)	0.643419	0.85309	0.0367653	0.0269698
Carbohydrates;Aminosugars;Chitin_and_N-acetylglucosamine_utilization;N-acetylglucosamine related transporter, NagX	0.311352	0.523088	0.0273572	0.0176027
Protein Metabolism;Protein folding;Periplasmic_disulfide_interchange	0.909639	0.999985	0.0415336	0.0318639
Virulence;Iron Scavenging Mechanisms;Siderophore_assembly_kit;TonB-dependent hemin , ferrichrome receptor	0.395207	0.607489	0.204022	0.194437
Carbohydrates;Monosaccharides;L-Arabinose_utilization	0.070056	0.184942	0.735032	0.725457
Metabolism of Aromatic Compounds	0.0291727	0.095807	0.158255	0.14872
Clustering-based subsystems;Disulphide_related_cluster	0.408786	0.617996	0.0293756	0.0198415
Clustering-based subsystems;Disulphide_related_cluster;Disulfide bond regulator	0.408786	0.617996	0.0293756	0.0198415
Virulence;Resistance to antibiotics and toxic compounds;USS-DB-4	0.00888586	0.0382997	0.0165886	0.00719909
Phosphorus Metabolism;Phosphoenolpyruvate_phosphomutase	0.000242383	0.00197655	0.0194395	0.0101319
Phosphorus Metabolism;Phosphoenolpyruvate_phosphomutase;2-aminoethylphosphonate:pyruvate aminotransferase (EC 2.6.1.37)	0.000242383	0.00197655	0.0194395	0.0101319
Carbohydrates;Central carbohydrate metabolism;Dehydrogenase_complexes;Dihydrolipoamide acetyltransferase component (E2) of acetoin dehydrogenase complex (EC 2.3.1.-)	0.357228	0.571001	0.0299469	0.0207445
Virulence;Resistance to antibiotics and toxic compounds;USS-DB-4;Efflux system membrane fusion protein [USSDB4B]	0.0111187	0.0456247	0.0160952	0.00704497
DNA Metabolism;CRISPRs;CRISPR-associated protein Cas1	0.0556427	0.158288	0.149303	0.140332
Amino Acids and Derivatives;Lysine, threonine, methionine, and cysteine;Lysine_fermentation	0.125108	0.280454	0.0234416	0.0145101
Carbohydrates;Monosaccharides;L-Arabinose_utilization;Transcriptional repressor of the arabinose operon	0.0840757	0.21137	0.0809391	0.0720628
Fatty Acids, Lipids, and Isoprenoids;Polyhydroxybutyrate_metabolism;Enoyl-CoA hydratase (EC 4.2.1.17)	3.11508e-05	0.000334915	0.0146784	0.00590106
Virulence;Resistance to antibiotics and toxic compounds;Methicillin_resistance_in_Staphylococci;UDP-N-acetylmuramoylalanyl-D-glutamyl-2,6-diaminopimelate--D-alanyl-D-alanine ligase (EC 6.3.2.10)	0.176025	0.358476	0.0697478	0.0610233
Carbohydrates;Sugar_utilization_in_Thermotogales;Beta-mannosidase (EC 3.2.1.25)	0.648373	0.857296	0.0368807	0.0281776
Potassium metabolism;Glutathione-regulated_potassium-efflux_system_and_associated_functions	0.171686	0.351687	0.215379	0.206689
Amino Acids and Derivatives;Aromatic amino acids and derivatives;Indole-pyruvate_oxidoreductase_complex	0.433108	0.640982	0.0261655	0.0174954
Clustering-based subsystems;Related to Menaquinone-cytochrome C reductase	0.274513	0.485753	0.0189706	0.0103945
Clustering-based subsystems;Related to Menaquinone-cytochrome C reductase ;CBSS-393130.3.peg.129	0.274513	0.485753	0.0189706	0.0103945
Clustering-based subsystems;Related to Menaquinone-cytochrome C reductase ;CBSS-393130.3.peg.129;TPR-repeat-containing protein, putative component of Menaquinone-cytochrome C reductase	0.274513	0.485753	0.0189706	0.0103945
Regulation and Cell signaling;Orphan_regulatory_proteins;Acetoacetate metabolism regulatory protein AtoC	0.376696	0.589871	0.120638	0.112114
Carbohydrates;Monosaccharides;D-gluconate_and_ketogluconates_metabolism	0.323337	0.53551	0.0252234	0.0167043
Secondary Metabolism;Aromatic amino acids and derivatives	0.225376	0.425022	0.0227058	0.0143126
Secondary Metabolism;Aromatic amino acids and derivatives;Cinnamic_Acid_Degradation	0.225376	0.425022	0.0227058	0.0143126
Amino Acids and Derivatives;Alanine, serine, and glycine;Glycine_and_Serine_Utilization	0.577101	0.7888	0.0303264	0.0219626
Secondary Metabolism;Aromatic amino acids and derivatives;Cinnamic_Acid_Degradation;Probable 3-phenylpropionic acid transporter	0.228755	0.430131	0.0221489	0.0138308
Clustering-based subsystems;CBSS-350688.3.peg.1509	0.938591	0.999985	0.042242	0.0339371
Clustering-based subsystems;CBSS-350688.3.peg.1509;FIG007959: peptidase, M16 family	0.938591	0.999985	0.042242	0.0339371
Stress Response;Oxidative stress;Protection_from_Reactive_Oxygen_Species;Catalase (EC 1.11.1.6)	0.00689533	0.0313611	0.0139325	0.00563963
Amino Acids and Derivatives;Lysine, threonine, methionine, and cysteine;Lysine_fermentation;Lysine 2,3-aminomutase (EC 5.4.3.2)	0.193609	0.385328	0.0217839	0.0134997
Amino Acids and Derivatives;Alanine, serine, and glycine;Glycine_Biosynthesis	0.551146	0.763629	0.0306236	0.0225037
Nitrogen Metabolism;Nitrate_and_nitrite_ammonification;Cytochrome c552 precursor (EC 1.7.2.2)	0.0520726	0.150196	0.0149266	0.00683035
Carbohydrates;Monosaccharides;Deoxyribose_and_Deoxynucleoside_Catabolism;Ribokinase (EC 2.7.1.15)	0.905128	0.999985	0.0407704	0.0326767
Sulfur Metabolism;Thioredoxin-disulfide_reductase;Alkyl hydroperoxide reductase subunit C-like protein	0.208768	0.40481	0.0231588	0.0152841
Amino Acids and Derivatives;Branched-chain amino acids;Branched_chain_amino_acid_degradation_regulons;Transcriptional regulator BkdR of isoleucine and valine catabolism operon	0.0177558	0.0650257	0.0148689	0.00707579
Clustering-based subsystems;CBSS-296591.1.peg.2330;Nucleoside-diphosphate-sugar epimerases	0.162142	0.337277	0.0137969	0.00608486
Phages, Prophages, Transposable elements;Phage family-specific subsystems;r1t-like_streptococcal_phages;Deoxyuridine 5'-triphosphate nucleotidohydrolase (EC 3.6.1.23)	0.959462	0.999985	0.0203513	0.0126481
Clustering-based subsystems;CBSS-296591.1.peg.2330	0.164432	0.339721	0.0137969	0.00610199
Phages, Prophages, Transposable elements;Bacteriophage structural proteins;Phage_tail_proteins_2;Phage tail length tape-measure protein 1	0.14239	0.309204	0.00893488	0.00126264
Carbohydrates;Di- and oligosaccharides;Maltose_and_Maltodextrin_Utilization;Maltose O-acetyltransferase (EC 2.3.1.79)	0.866527	0.999985	0.0412984	0.0337145
Metabolism of Aromatic Compounds;Salicylate_and_gentisate_catabolism	0.945649	0.999985	0.0608273	0.0532728
Metabolism of Aromatic Compounds;Phenylacetyl-CoA_catabolic_pathway_(core)	0.732422	0.943356	0.0334456	0.0259046
Cofactors, Vitamins, Prosthetic Groups, Pigments;Riboflavin, FMN, FAD;riboflavin_to_FAD;3,4-dihydroxy-2-butanone 4-phosphate synthase	0.0306502	0.0995551	0.0139513	0.00648329
Cofactors, Vitamins, Prosthetic Groups, Pigments;Folate and pterines;Folate_Biosynthesis	0.421783	0.629649	0.0840987	0.0766316
Metabolism of Aromatic Compounds;Phenylacetyl-CoA_catabolic_pathway_(core);Phenylacetate-coenzyme A ligase (EC 6.2.1.30) PaaF	0.74627	0.955871	0.033333	0.0259046
Plant-Prokaryote DOE project;Experimental-Ubiquinone_BiosynthesisVDC;3-demethylubiquinone-9 3-methyltransferase (EC 2.1.1.64)	0.494305	0.704398	0.0281421	0.0207331
Fatty Acids, Lipids, and Isoprenoids;Fatty acids;Fatty_Acid_Biosynthesis_FASII;Biotin carboxylase of acetyl-CoA carboxylase (EC 6.3.4.14)	0.744387	0.954095	0.0305356	0.0231624
Protein Metabolism;Protein folding;Peptidyl-prolyl_cis-trans_isomerase;Survival protein SurA precursor (Peptidyl-prolyl cis-trans isomerase SurA) (EC 5.2.1.8)	0.916254	0.999985	0.0533597	0.0460269
Carbohydrates;Monosaccharides;Deoxyribose_and_Deoxynucleoside_Catabolism	0.335149	0.547069	0.057483	0.0501585
Nitrogen Metabolism;Nitrate_and_nitrite_ammonification;Ferredoxin-type protein NapG (periplasmic nitrate reductase)	0.0192898	0.0691952	0.0122993	0.00512476
Virulence;Resistance to antibiotics and toxic compounds;Cobalt-zinc-cadmium_resistance;Heavy metal sensor histidine kinase	0.0723903	0.18903	0.0148054	0.00763177
Carbohydrates;Di- and oligosaccharides;Maltose_and_Maltodextrin_Utilization;Alpha-glucosidase (EC 3.2.1.20)	0.622529	0.832563	0.10427	0.0971306
Protein Metabolism;Protein degradation;Proteolysis_in_bacteria,_ATP-dependent;ATP-dependent Clp protease, ATP-binding subunit ClpC	0.937155	0.999985	0.0286052	0.0214888
Motility and Chemotaxis;Flagellar motility in Prokaryota;Flagellum;Flagellar regulatory protein FleQ	0.000676646	0.00471813	0.00958556	0.00247276
Carbohydrates;Central carbohydrate metabolism;Dehydrogenase_complexes;Acetoin dehydrogenase E1 component beta-subunit (EC 1.2.4.-)	0.141199	0.307395	0.0160923	0.00898802
Potassium metabolism;Glutathione-regulated_potassium-efflux_system_and_associated_functions;Potassium efflux system KefA protein / Small-conductance mechanosensitive channel	0.654839	0.863472	0.0591263	0.052073
Protein Metabolism;Protein folding;Periplasmic_disulfide_interchange;Cytochrome c-type biogenesis protein CcmG/DsbE, thiol:disulfide oxidoreductase	0.233931	0.436876	0.0157013	0.0086638
Metabolism of Aromatic Compounds;Salicylate_and_gentisate_catabolism;4-hydroxybenzoate transporter	0.811786	0.999985	0.0493229	0.0422949
Amino Acids and Derivatives;Branched-chain amino acids;Valine_degradation;Phosphate butyryltransferase (EC 2.3.1.19)	0.361732	0.575937	0.0225183	0.015501
Regulation and Cell signaling;Trans-envelope_signaling_system_VreARI_in_Pseudomonas;Sigma factor regulator VreR (cytoplasmic membrane-localized) of trans-envelope signaling system	0.568925	0.782689	0.0415292	0.0345216
Virulence;Pseudomonas_quinolone_signal_PQS	0.0124557	0.0499397	0.0213583	0.0143582
Virulence;Pseudomonas_quinolone_signal_PQS;BarA-associated response regulator UvrY (= GacA = SirA)	0.0124557	0.0499397	0.0213583	0.0143582
Virulence;Iron Scavenging Mechanisms;Hemin_transport_system;Ferric siderophore transport system, periplasmic binding protein TonB	0.509	0.719549	0.0416649	0.0347796
Amino Acids and Derivatives;Histidine Metabolism;Histidine_Degradation;Urocanate hydratase (EC 4.2.1.49)	0.282736	0.49209	0.0209774	0.0141436
Carbohydrates;Monosaccharides;L-Arabinose_utilization;Arabinose operon regulatory protein	0.0694584	0.183995	0.127665	0.120851
Clustering-based subsystems;Bacterial_RNA-metabolizing_Zn-dependent_hydrolases;Cell division protein FtsK	0.155623	0.328215	0.0815378	0.0747342
Phosphorus Metabolism;Phosphate_metabolism;Phosphate regulon sensor protein PhoR (SphS) (EC 2.7.13.3)	0.0393493	0.120874	0.210866	0.204071
Carbohydrates;Organic acids;Propionate-CoA_to_Succinate_Module;Methylisocitrate lyase (EC 4.1.3.30)	0.00162371	0.00963716	0.00845301	0.00174783
RNA Metabolism;RNA processing and modification;Queuosine-Archaeosine_Biosynthesis;Permease of the drug/metabolite transporter (DMT) superfamily	0.170723	0.349899	0.0844998	0.07782
Membrane Transport;Uni- Sym- and Antiporters;Na(+)_H(+)_antiporter	0.0720738	0.188351	0.0145298	0.0078521
Membrane Transport;Uni- Sym- and Antiporters;Na(+)_H(+)_antiporter;Na+/H+ antiporter NhaA type	0.0720738	0.188351	0.0145298	0.0078521
Potassium metabolism	0.0196629	0.0702064	0.258281	0.251636
Stress Response;Acid stress;Acid_resistance_mechanisms;Glutamate decarboxylase (EC 4.1.1.15)	0.191454	0.382213	0.0166377	0.0100155
Protein Metabolism;Protein folding;Protein_chaperones	0.00360442	0.0182305	0.20559	0.199072
Regulation and Cell signaling;Trans-envelope_signaling_system_VreARI_in_Pseudomonas	0.59137	0.804305	0.0422751	0.0357843
Virulence;Ton_and_Tol_transport_systems	0.84373	0.999985	0.0400995	0.0336106
Plant-Prokaryote DOE project;COG2363;Hydroxyethylthiazole kinase (EC 2.7.1.50)	0.768952	0.979707	0.0436284	0.0371519
RNA Metabolism;Transcription;Transcription_factors_bacterial;Transcription antitermination protein UpdY	0.684173	0.894187	0.0416418	0.0351689
Amino Acids and Derivatives;Aromatic amino acids and derivatives;Indole-pyruvate_oxidoreductase_complex;Indolepyruvate oxidoreductase subunit IorA (EC 1.2.7.8)	0.44778	0.654827	0.0197049	0.0132566
Carbohydrates;Di- and oligosaccharides;Lactose_and_Galactose_Uptake_and_Utilization;Aldose 1-epimerase (EC 5.1.3.3)	0.478727	0.686519	0.0477676	0.0413348
Carbohydrates;Central carbohydrate metabolism;Glyoxylate_bypass	0.218966	0.417849	0.0937564	0.0873572
Virulence;Resistance to antibiotics and toxic compounds;Cobalt-zinc-cadmium_resistance;Cation efflux system protein CusC precursor	0.225227	0.425022	0.018607	0.0122976
Stress Response;Oxidative stress;Oxidative_stress;Paraquat-inducible protein B	0.185268	0.372764	0.0157071	0.00941156
Carbohydrates;Di- and oligosaccharides;Trehalose_Uptake_and_Utilization;Trehalase (EC 3.2.1.28)	0.837589	0.999985	0.0295184	0.0232264
Carbohydrates;One-carbon Metabolism;Serine-glyoxylate_cycle;Propionyl-CoA carboxylase beta chain (EC 6.4.1.3)	0.848746	0.999985	0.0332046	0.0269241
Carbohydrates;Central carbohydrate metabolism;Entner-Doudoroff_Pathway;Glucose-6-phosphate 1-dehydrogenase (EC 1.1.1.49)	0.0648001	0.175398	0.0141821	0.00790461
Amino Acids and Derivatives;Lysine, threonine, methionine, and cysteine;Methionine_Salvage;5'-methylthioadenosine phosphorylase (EC 2.4.2.28)	0.587623	0.799775	0.0242914	0.0180183
Amino Acids and Derivatives;Glutamine, glutamate, aspartate, asparagine; ammonia assimilation;Glutamine,_Glutamate,_Aspartate_and_Asparagine_Biosynthesis;L-asparaginase (EC 3.5.1.1)	0.798662	0.999985	0.0321615	0.0258989
Amino Acids and Derivatives;Lysine, threonine, methionine, and cysteine;Cysteine_Biosynthesis;Sulfate permease, Trk-type	0.0693931	0.183995	0.0154445	0.00921863
Phages, Prophages, Transposable elements;Phage family-specific subsystems;r1t-like_streptococcal_phages;Phage major tail protein	0.367258	0.58124	0.00893633	0.00277301
Respiration;Electron donating reactions;Respiratory_Complex_I;NADH dehydrogenase I subunit 4, Involved in photosystem-1 cyclic electron flow	0.216615	0.414594	0.0161832	0.0100337
Nucleosides and Nucleotides;Ribonucleotide_reduction	0.948891	0.999985	0.0315008	0.0253772
Carbohydrates;One-carbon Metabolism;Serine-glyoxylate_cycle	0.0485562	0.143433	0.182968	0.176851
Clustering-based subsystems;CBSS-290633.1.peg.1906	0.158317	0.331897	0.0184093	0.0123067
Clustering-based subsystems;CBSS-290633.1.peg.1906;Outer membrane protein YfgL, lipoprotein component of the protein assembly complex (forms a complex with YaeT, YfiO, and NlpB)	0.158317	0.331897	0.0184093	0.0123067
Amino Acids and Derivatives;Histidine Metabolism;Histidine_Degradation;Histidine ammonia-lyase (EC 4.3.1.3)	0.571237	0.783847	0.0248368	0.0187523
Respiration;Electron donating reactions;Formate_dehydrogenase	8.36449e-05	0.000800869	0.0069742	0.000893893
Sulfur Metabolism;Thioredoxin-disulfide_reductase	0.368031	0.581984	0.0370813	0.031026
Carbohydrates;Sugar_utilization_in_Thermotogales;Xylulose kinase (EC 2.7.1.17)	0.180146	0.365516	0.056616	0.050574
Regulation and Cell signaling;Two-component_regulatory_systems_in_Campylobacter	0.281321	0.491514	0.0637142	0.0576829
Phages, Prophages, Transposable elements;Lysogenic conversion	0.671912	0.880854	0.0473363	0.0413394
Phages, Prophages, Transposable elements;Lysogenic conversion;Prophage_lysogenic_conversion_modules	0.671912	0.880854	0.0473363	0.0413394
Phages, Prophages, Transposable elements;Lysogenic conversion;Prophage_lysogenic_conversion_modules;Phage-associated cell wall hydrolase	0.671912	0.880854	0.0473363	0.0413394
Cell Wall and Capsule;Capsular and extracellular polysacchrides;Alginate_metabolism;poly(beta-D-mannuronate) lyase (EC 4.2.2.3)	0.31601	0.526559	0.00744165	0.00146471
Virulence;Resistance to antibiotics and toxic compounds;USS-DB-6	0.0702643	0.184985	0.0119892	0.00604605
Carbohydrates;One-carbon Metabolism	0.0332786	0.106122	0.186848	0.180961
RNA Metabolism;RNA processing and modification;tRNA_modification_Archaea;Protein RtcB	0.330931	0.543643	0.0163174	0.0104539
Fatty Acids, Lipids, and Isoprenoids;Polyhydroxybutyrate_metabolism	0.971372	0.999985	0.0295199	0.0236967
Carbohydrates;Central carbohydrate metabolism;Glycolysis_and_Gluconeogenesis;Fructose-bisphosphate aldolase class I (EC 4.1.2.13)	0.28422	0.492997	0.0165165	0.0106936
Carbohydrates;Central carbohydrate metabolism;Soluble_methane_monooxygenase_(sMMO)	0.0204317	0.0723179	0.0106287	0.0048188
Carbohydrates;Central carbohydrate metabolism;Soluble_methane_monooxygenase_(sMMO);Methane monooxygenase component C (EC 1.14.13.25)	0.0204317	0.0723179	0.0106287	0.0048188
Respiration;Electron donating reactions;Respiratory_dehydrogenases_1	0.0631178	0.172176	0.0561211	0.0503491
Regulation and Cell signaling;Two-component_regulatory_systems_in_Campylobacter;Chemotaxis regulator - transmits chemoreceptor signals to flagelllar motor components CheY	0.477814	0.685467	0.0384634	0.032703
Clustering-based subsystems;CBSS-251221.1.peg.1863;Outer membrane protein/protective antigen OMA87	0.929557	0.999985	0.022853	0.0170981
Virulence;Iron Scavenging Mechanisms;Siderophore_Yersiniabactin_Biosynthesis	0.260972	0.470044	0.0467015	0.0409844
Amino Acids and Derivatives;Lysine, threonine, methionine, and cysteine;Methionine_Salvage	0.997978	0.999985	0.027376	0.0216715
Amino Acids and Derivatives;Branched-chain amino acids;Valine_degradation;Butyrate kinase (EC 2.7.2.7)	0.126903	0.283488	0.0134939	0.00780073
Amino Acids and Derivatives;Arginine; urea cycle, polyamines;Arginine_Deiminase_Pathway	0.406611	0.615675	0.0399177	0.0342545
Fatty Acids, Lipids, and Isoprenoids;Fatty acids;Phospholipid_and_Fatty_acid_biosynthesis_related_cluster	0.620929	0.831578	0.028924	0.0233348
Carbohydrates;Central carbohydrate metabolism;Glycolysis_and_Gluconeogenesis;Phosphoglycerate mutase (EC 5.4.2.1)	0.844967	0.999985	0.0229511	0.0173698
Fatty Acids, Lipids, and Isoprenoids;Fatty acids;Phospholipid_and_Fatty_acid_biosynthesis_related_cluster;FIG021862: membrane protein, exporter	0.546242	0.757797	0.0246752	0.0191154
Amino Acids and Derivatives;Lysine, threonine, methionine, and cysteine;Lysine_Biosynthesis_DAP_Pathway;2,3,4,5-tetrahydropyridine-2,6-dicarboxylate N-acetyltransferase (EC 2.3.1.89)	0.51898	0.728769	0.016049	0.0105224
Cell Wall and Capsule;Capsular and extracellular polysacchrides;Extracellular_Polysaccharide_Biosynthesis_of_Streptococci;Capsular polysaccharide repeat unit transporter CpsL	0.180913	0.366491	0.0097558	0.00424
Clustering-based subsystems;Hypothetical Related to Dihydroorate Dehydrogenase	0.0888876	0.220018	0.0148617	0.00937046
Clustering-based subsystems;Hypothetical Related to Dihydroorate Dehydrogenase;Hypothetical_Related_to_Dihydroorotate_dehydrogenase	0.0888876	0.220018	0.0148617	0.00937046
Clustering-based subsystems;Hypothetical Related to Dihydroorate Dehydrogenase;Hypothetical_Related_to_Dihydroorotate_dehydrogenase;Dihydroorotate dehydrogenase (EC 1.3.3.1)	0.0888876	0.220018	0.0148617	0.00937046
Amino Acids and Derivatives;Alanine, serine, and glycine;Glycine_Biosynthesis;L-threonine 3-dehydrogenase (EC 1.1.1.103)	0.0192853	0.0691952	0.0120642	0.00658033
Virulence;Resistance to antibiotics and toxic compounds;Bacitracin_Stress_Response;Sensor histidine kinase LiaS	0.889826	0.999985	0.0066265	0.00116332
Amino Acids and Derivatives;Lysine, threonine, methionine, and cysteine;Cysteine_Biosynthesis	0.00283789	0.0152132	0.170261	0.164834
Virulence;Iron Scavenging Mechanisms;Siderophore_Yersiniabactin_Biosynthesis;iron aquisition outermembrane yersiniabactin receptor (FyuA,Psn,pesticin receptor)	0.911643	0.999985	0.0285374	0.0231328
Virulence;Type III, Type IV, Type VI, ESAT secretion systems;Type_IV_pilus	0.0855628	0.213071	0.201595	0.196196
Stress Response;Oxidative stress;Protection_from_Reactive_Oxygen_Species;Cytochrome c551 peroxidase (EC 1.11.1.5)	0.0878282	0.217957	0.00799422	0.00263373
Clustering-based subsystems;CBSS-87626.3.peg.3639	0.0368219	0.11471	0.0121031	0.00675956
Amino Acids and Derivatives;Histidine Metabolism;Histidine_Degradation;Imidazolonepropionase (EC 3.5.2.7)	0.21	0.406102	0.0146972	0.00941841
Amino Acids and Derivatives;Alanine, serine, and glycine;Glycine_and_Serine_Utilization;2-amino-3-ketobutyrate coenzyme A ligase (EC 2.3.1.29)	0.202038	0.396352	0.0137883	0.00856904
Clustering-based subsystems;Cytochrome biogenesis;CBSS-196164.1.peg.461;Cytochrome c-type biogenesis protein CcsA/ResC	0.0657563	0.177407	0.00822073	0.00303901
Carbohydrates;Sugar_utilization_in_Thermotogales;Xylose isomerase (EC 5.3.1.5)	0.0182514	0.0665872	0.0124984	0.00733837
Carbohydrates;Central carbohydrate metabolism;TCA_Cycle;Dihydrolipoamide dehydrogenase (EC 1.8.1.4)	0.266362	0.476628	0.0155426	0.0103991
Carbohydrates;Central carbohydrate metabolism;TCA_Cycle;Succinyl-CoA ligase [ADP-forming] alpha chain (EC 6.2.1.5)	0.0253717	0.0855878	0.00734643	0.00222046
Amino Acids and Derivatives;Lysine, threonine, methionine, and cysteine;Methionine_Biosynthesis;Adenosylhomocysteinase (EC 3.3.1.1)	0.14733	0.315742	0.0141331	0.00901313
Carbohydrates;Monosaccharides;D-gluconate_and_ketogluconates_metabolism;6-phosphogluconate dehydrogenase, decarboxylating (EC 1.1.1.44)	0.160764	0.335563	0.0138676	0.0087517
Virulence;Resistance to antibiotics and toxic compounds;Methicillin_resistance_in_Staphylococci;D-alanine--poly(phosphoribitol) ligase subunit 1 (EC 6.1.1.13)	0.054972	0.156731	0.00655436	0.00144644
Fatty Acids, Lipids, and Isoprenoids;Isoprenoids;polyprenyl_synthesis	0.659517	0.868748	0.0306957	0.0255941
RNA Metabolism;RNA processing and modification;tRNA_modification_Bacteria;tRNA (5-methylaminomethyl-2-thiouridylate)-methyltransferase (EC 2.1.1.61)	0.266201	0.476562	0.041196	0.0361576
Protein Metabolism;Protein degradation;Aminopeptidases_(EC_3.4.11.-);Membrane alanine aminopeptidase N (EC 3.4.11.2)	0.123437	0.278329	0.0117627	0.00674929
Membrane Transport;Transport_of_Zinc;Zinc ABC transporter, ATP-binding protein ZnuC	0.0207976	0.0731718	0.00952641	0.00454481
Clustering-based subsystems;Putative asociate of RNA polymerase sigma-54 factor rpoN	0.509806	0.719825	0.044497	0.0395231
Clustering-based subsystems;Putative asociate of RNA polymerase sigma-54 factor rpoN;CBSS-316057.3.peg.1308	0.509806	0.719825	0.044497	0.0395231
Clustering-based subsystems;Putative asociate of RNA polymerase sigma-54 factor rpoN;CBSS-316057.3.peg.1308;putative RNA polymerase sigma factor	0.509806	0.719825	0.044497	0.0395231
Membrane Transport;Potassium_homeostasis;Potassium voltage-gated channel subfamily KQT	0.280706	0.491116	0.0142167	0.00926886
Carbohydrates;Central carbohydrate metabolism;TCA_Cycle;Succinyl-CoA ligase [ADP-forming] beta chain (EC 6.2.1.5)	0.015711	0.0594024	0.00783696	0.0029043
Clustering-based subsystems;Protein export?;CBSS-393121.3.peg.2760;NLP/P60 family protein	2.1511e-06	3.20915e-05	0.00753543	0.00260633
Protein Metabolism;Protein processing and modification;Signal_peptidase	0.209582	0.405979	0.0636969	0.0588051
Cell Wall and Capsule;Cell wall of Mycobacteria;mycolic_acid_synthesis;3-oxoacyl-[acyl-carrier protein] reductase (EC 1.1.1.100)	0.0995953	0.240039	0.0816201	0.0767309
Clustering-based subsystems;Shikimate_kinase_containing_cluster	0.500302	0.710315	0.0122128	0.00732809
Clustering-based subsystems;Shikimate_kinase_containing_cluster;Methyl-directed repair DNA adenine methylase (EC 2.1.1.72)	0.500302	0.710315	0.0122128	0.00732809
Protein Metabolism;Protein degradation;Putative_TldE-TldD_proteolytic_complex	4.23934e-07	7.84482e-06	0.00853957	0.00367603
Protein Metabolism;Protein degradation;Putative_TldE-TldD_proteolytic_complex;TldD protein, part of proposed TldE/TldD proteolytic complex (PMID 12029038)	4.23934e-07	7.84482e-06	0.00853957	0.00367603
Virulence;Type III, Type IV, Type VI, ESAT secretion systems;Type_III_secretion_system	0.783026	0.992383	0.0358333	0.0309723
Motility and Chemotaxis;Flagellar motility in Prokaryota;Flagellum;Flagellum-specific ATP synthase FliI	0.502246	0.712025	0.0424252	0.0375686
Stress Response;Osmotic stress;Choline_and_Betaine_Uptake_and_Betaine_Biosynthesis;High-affinity choline uptake protein BetT	0	0	0.00622398	0.00138251
Virulence;Resistance to antibiotics and toxic compounds;Methicillin_resistance_in_Staphylococci;D-alanyl transfer protein DltB	0.0490029	0.144309	0.0426748	0.0378506
Amino Acids and Derivatives;Glutamine, glutamate, aspartate, asparagine; ammonia assimilation;Glutamine,_Glutamate,_Aspartate_and_Asparagine_Biosynthesis;NAD-specific glutamate dehydrogenase (EC 1.4.1.2)	0.278701	0.490284	0.013504	0.00868891
Regulation and Cell signaling;Programmed Cell Death and Toxin-antitoxin Systems;Murein_hydrolase_regulation_and_cell_death;Pyruvate oxidase, CidC	0.355717	0.56955	0.0102651	0.00545012
Cell Wall and Capsule;Gram-Negative cell wall components;KDO2-Lipid_A_biosynthesis	0.467888	0.67647	0.10092	0.0961112
Virulence;Ton_and_Tol_transport_systems;Galactose-regulated TonB-dependent outer membrane receptor	0.79489	0.999985	0.00662217	0.00182203
Phosphorus Metabolism;Phosphate_metabolism;Alkaline phosphatase (EC 3.1.3.1)	0.899675	0.999985	0.0247502	0.0199579
Cell Wall and Capsule;Gram-Positive cell wall components	0.0537127	0.153918	0.150361	0.145614
DNA Metabolism;CRISPRs	0.0561053	0.159093	0.161709	0.156997
Regulation and Cell signaling;Programmed Cell Death and Toxin-antitoxin Systems;Murein_hydrolase_regulation_and_cell_death	0.595078	0.807635	0.0146856	0.00997667
Cofactors, Vitamins, Prosthetic Groups, Pigments;Biotin;Biotin_biosynthesis;Biotin synthesis protein bioG	0.0384762	0.118666	0.00864201	0.00398656
Plant-Prokaryote DOE project;COG2363;Hydroxymethylpyrimidine ABC transporter, substrate-binding component	0.0333753	0.106255	0.0115015	0.00684975
Membrane Transport;Potassium_homeostasis;putative Glutathione-regulated potassium-efflux system protein KefB	0.062891	0.172045	0.00713002	0.00250244
Amino Acids and Derivatives;Arginine; urea cycle, polyamines;Arginine_and_Ornithine_Degradation;Transcriptional regulator of catabolic arginine decarboxylase (adiA)	0.096829	0.234399	0.0057421	0.00112108
Carbohydrates;Sugar alcohols;Inositol_catabolism;Myo-inositol 2-dehydrogenase 2 (EC 1.1.1.18)	0.0282122	0.0931386	0.00547952	0.000890468
Clustering-based subsystems;CBSS-316273.3.peg.448	0.696587	0.907331	0.0363599	0.0317771
Clustering-based subsystems;CBSS-316273.3.peg.448;FIG017823: ATPase, MoxR family	0.696587	0.907331	0.0363599	0.0317771
Fatty Acids, Lipids, and Isoprenoids;Isoprenoids;polyprenyl_synthesis;Isopentenyl-diphosphate delta-isomerase (EC 5.3.3.2)	0.95786	0.999985	0.0206398	0.0160695
Carbohydrates;Central carbohydrate metabolism;Glyoxylate_bypass;Malate dehydrogenase (EC 1.1.1.37)	0.942149	0.999985	0.0236061	0.0190651
Amino Acids and Derivatives;Glutamine, glutamate, aspartate, asparagine; ammonia assimilation;Glutamine,_Glutamate,_Aspartate_and_Asparagine_Biosynthesis;Glutaminase (EC 3.5.1.2)	0.453369	0.660491	0.0139008	0.00936704
Clustering-based subsystems;CBSS-316057.3.peg.3521	0.62374	0.833024	0.0210928	0.0165627
Nucleosides and Nucleotides;Pyrimidines;pyrimidine_conversions;Thioredoxin reductase (EC 1.8.1.9)	0.0239856	0.0819898	0.0476234	0.0431226
Cell Wall and Capsule;Recycling_of_Peptidoglycan_Amino_Acids;Muramoyltetrapeptide carboxypeptidase (EC 3.4.17.13)	0.163355	0.338403	0.0127163	0.00823683
Membrane Transport;ABC transporters;ABC_transporter_dipeptide_(TC_3.A.1.5.2)	0.490675	0.700782	0.0305991	0.0261295
Cell Wall and Capsule;Gram-Negative cell wall components;LOS_core_oligosaccharide_biosynthesis;Beta-1,3-glucosyltransferase	0.496238	0.706368	0.0100256	0.005562
Clustering-based subsystems;CBSS-176280.1.peg.1561;Monofunctional biosynthetic peptidoglycan transglycosylase (EC 2.4.2.-)	0.921883	0.999985	0.033209	0.028753
Nucleosides and Nucleotides;Ribonucleotide_reduction;Ribonucleotide reductase of class Ib (aerobic), alpha subunit (EC 1.17.4.1)	0.630465	0.840547	0.0168223	0.0123821
Clustering-based subsystems;CBSS-87626.3.peg.3639;Aminomethyltransferase (glycine cleavage system T protein) (EC 2.1.2.10)	0.127682	0.284517	0.0111625	0.00674929
DNA Metabolism;DNA repair;DNA_Repair_Base_Excision;DNA-3-methyladenine glycosylase II (EC 3.2.2.21)	0.389702	0.602637	0.0156638	0.011269
Carbohydrates;Monosaccharides;Hexose_Phosphate_Uptake_System	0.00264762	0.0144344	0.00568006	0.00133114
Carbohydrates;Monosaccharides;Hexose_Phosphate_Uptake_System;Homolog of fucose/glucose/galactose permeases	0.00264762	0.0144344	0.00568006	0.00133114
Virulence;Resistance to antibiotics and toxic compounds;Bacitracin_Stress_Response	0.875128	0.999985	0.0178539	0.0135294
Carbohydrates;CO2 fixation;CO2_uptake,_carboxysome	0.00352208	0.0178845	0.111955	0.107644
Cell Wall and Capsule;Gram-Negative cell wall components;Lipopolysaccharide-related_cluster_in_Alphaproteobacteria;TldE/PmbA protein, part of proposed TldE/TldD proteolytic complex (PMID 12029038)	8.80882e-07	1.47414e-05	0.00675202	0.0024602
Clustering-based subsystems;Biosynthesis of galactoglycans and related lipopolysacharides;CBSS-258594.1.peg.3339;Tyrosine-protein kinase Wzc (EC 2.7.10.2)	0.275563	0.487203	0.109146	0.104862
Carbohydrates;Central carbohydrate metabolism;Dehydrogenase_complexes;Dihydrolipoamide dehydrogenase of acetoin dehydrogenase (EC 1.8.1.4)	0.132206	0.291972	0.010304	0.00608144
Stress Response;Acid stress	0.127938	0.284517	0.0525489	0.0484163
Stress Response;Acid stress;Acid_resistance_mechanisms	0.127938	0.284517	0.0525489	0.0484163
Cofactors, Vitamins, Prosthetic Groups, Pigments;Thiamin_biosynthesis;Thiazole biosynthesis protein ThiH	0.24879	0.456431	0.0429172	0.0387936
Metabolism of Aromatic Compounds;Metabolism of central aromatic intermediates;Homogentisate_pathway_of_aromatic_compound_degradation	1.08542e-05	0.000132208	0.00557186	0.00152065
Carbohydrates;Monosaccharides;L-fucose_utilization	0.887954	0.999985	0.0207134	0.0166871
Protein Metabolism;Protein processing and modification;Signal_peptidase;Signal peptidase I (EC 3.4.21.89)	0.246462	0.453369	0.0488728	0.0448727
Phages, Prophages, Transposable elements;Phage family-specific subsystems;r1t-like_streptococcal_phages;Phage portal protein	0.160882	0.335628	0.0110067	0.007021
Clustering-based subsystems;CBSS-176280.1.peg.1561;Sensor histidine kinase VraS	0.35539	0.569482	0.00887429	0.00490785
Cofactors, Vitamins, Prosthetic Groups, Pigments;Coenzyme A;Coenzyme_A_Biosynthesis;Pantothenate:Na+ symporter (TC 2.A.21.1.1)	0.82129	0.999985	0.0122157	0.00829163
Cell Wall and Capsule;Capsular and extracellular polysacchrides;Sialic_Acid_Metabolism;N-Acetylneuraminate cytidylyltransferase (EC 2.7.7.43)	0.537664	0.748993	0.0281594	0.0242458
Plant-Prokaryote DOE project;Experimental-PTPS;Cell division inhibitor	0.321144	0.532565	0.00807934	0.00418862
Carbohydrates;Fermentation;Fermentations:_Mixed_acid;Alcohol dehydrogenase (EC 1.1.1.1)	0.194572	0.386632	0.0336447	0.0297873
Metabolism of Aromatic Compounds;Metabolism of central aromatic intermediates;Homogentisate_pathway_of_aromatic_compound_degradation;Aromatic-amino-acid aminotransferase (EC 2.6.1.57)	1.90746e-07	3.84388e-06	0.00427339	0.000426968
Protein Metabolism;Protein processing and modification;N-linked_Glycosylation_in_Bacteria;Lipid carrier : UDP-N-acetylgalactosaminyltransferase (EC 2.4.1.-)	0.786649	0.996059	0.014084	0.0102735
Carbohydrates;Fermentation;Fermentations:_Mixed_acid;D-lactate dehydrogenase (EC 1.1.1.28)	0.523199	0.733052	0.0137334	0.00994584
Cell Wall and Capsule;Capsular and extracellular polysacchrides;Alginate_metabolism;Alginate lyase precursor (EC 4.2.2.3)	0.807812	0.999985	0.00557619	0.00185742
Protein Metabolism;Protein degradation;Aminopeptidases_(EC_3.4.11.-)	0.0296055	0.0969801	0.0696583	0.0659437
Regulation and Cell signaling;Two-component_regulatory_systems_in_Campylobacter;Signal transduction histidine kinase CheA (EC 2.7.3.-)	0.542596	0.753696	0.0133093	0.0095965
DNA Metabolism;DNA repair;DNA_repair,_bacterial_RecFOR_pathway;Single-stranded DNA-binding protein	0.60189	0.814011	0.0311992	0.0275234
Plant-Prokaryote DOE project;Iron-sulfur_cluster_assembly;Nitric oxide-dependent regulator DnrN or NorA	0.223481	0.423941	0.00909647	0.00542957
RNA Metabolism;RNA processing and modification;tRNA_modification_Bacteria;5-methylaminomethyl-2-thiouridine-forming enzyme mnmC	0.173568	0.354411	0.00796825	0.00430964
Phosphorus Metabolism;Phosphate_metabolism;Probable low-affinity inorganic phosphate transporter	0.423147	0.631276	0.0102867	0.00663513
Carbohydrates;Monosaccharides;L-fucose_utilization;Lactaldehyde reductase (EC 1.1.1.77)	0.796305	0.999985	0.020334	0.0166871
Plant-Prokaryote DOE project;At1g69340_At2g40600;Lipoate-protein ligase A	0.00277821	0.0150187	0.0073118	0.00366576
Plant-Prokaryote DOE project;Experimental-PTPS	0.623576	0.833024	0.0352201	0.0315842
Virulence;Resistance to antibiotics and toxic compounds;Cobalt-zinc-cadmium_resistance;Cobalt-zinc-cadmium resistance protein CzcD	0.000264781	0.00212322	0.00679963	0.00318399
Plant-Prokaryote DOE project;Competence_or_DNA_damage-inducible_protein_CinA_and_related_protein_families;Lipoate synthase	0.229416	0.431163	0.00942397	0.00582229
Respiration;Electron accepting reactions;trimethylamine_N-oxide_(TMAO)_reductase	0.095492	0.231892	0.00600468	0.00244536
Carbohydrates;Sugar alcohols;Mannitol_Utilization;Fructokinase (EC 2.7.1.4)	0.49959	0.710089	0.0523411	0.0488045
Carbohydrates;Sugar alcohols;Inositol_catabolism;Sodium/myo-inositol cotransporter	8.3586e-06	0.000104796	0.00472208	0.00122611
Carbohydrates;Aminosugars;N-Acetyl-Galactosamine_and_Galactosamine_Utilization;N-Acetyl-D-galactosamine permease, possible	0.113911	0.263329	0.0105147	0.00702899
Virulence;Resistance to antibiotics and toxic compounds;USS-DB-6;ABC-type transport system involved in resistance to organic solvents, periplasmic component USSDB6C	0.0909995	0.223521	0.00587772	0.0023997
Amino Acids and Derivatives;Aromatic amino acids and derivatives;Tryptophan_catabolism	0.317799	0.528384	0.00766527	0.00418748
Virulence;Type III, Type IV, Type VI, ESAT secretion systems;ESAT-6_proteins_secretion_system_in_Firmicutes	0.282801	0.49209	0.00776915	0.00430393
Virulence;Type III, Type IV, Type VI, ESAT secretion systems;ESAT-6_proteins_secretion_system_in_Firmicutes;FtsK/SpoIIIE family protein, putative secretion system component EssC/YukA	0.282801	0.49209	0.00776915	0.00430393
Amino Acids and Derivatives;Aromatic amino acids and derivatives;Chorismate:_Intermediate_for_synthesis_of_PAPA_antibiotics,_PABA,_anthranilate,_3-hydroxyanthranilate_and_more.;Isochorismatase (EC 3.3.2.1)	0.43741	0.644313	0.00662506	0.00317258
Protein Metabolism;Secretion;Protein_secretion_by_ABC-type_exporters	0.470433	0.678418	0.0100141	0.00657576
Protein Metabolism;Secretion;Protein_secretion_by_ABC-type_exporters;ABC-type protease exporter, membrane fusion protein (MFP) family component PrtE/AprE	0.470433	0.678418	0.0100141	0.00657576
Cofactors, Vitamins, Prosthetic Groups, Pigments;Biotin;Biotin_biosynthesis;8-amino-7-oxononanoate synthase (EC 2.3.1.47)	0.317615	0.528344	0.0244732	0.0210413
Clustering-based subsystems;CBSS-291331.3.peg.3674;Oxidoreductase, short-chain dehydrogenase/reductase family (EC 1.1.1.-)	0.857555	0.999985	0.0138777	0.0104596
Carbohydrates;Monosaccharides;D-galactarate,_D-glucarate_and_D-glycerate_catabolism	0.409049	0.618151	0.0245179	0.0211166
Carbohydrates;Central carbohydrate metabolism;Glycolysis_and_Gluconeogenesis;Hexokinase (EC 2.7.1.1)	0.298163	0.506456	0.00718773	0.00381189
Membrane Transport;Potassium_homeostasis;Glutathione-regulated potassium-efflux system protein KefC	0.944258	0.999985	0.0185132	0.0151654
Plant-Prokaryote DOE project;Competence_or_DNA_damage-inducible_protein_CinA_and_related_protein_families	0.73594	0.946419	0.0124335	0.00909647
Clustering-based subsystems;CBSS-291331.3.peg.3674	0.882828	0.999985	0.0154806	0.0121446
Carbohydrates;Sugar alcohols;Mannitol_Utilization;Multiple polyol-specific dehydrogenase (EC 1.1.1.-)	0.835775	0.999985	0.0076696	0.00436443
Miscellaneous;ZZ_gjo_need_homes;Putative GTP-binding protien TM0445	0.953587	0.999985	0.0155123	0.0122143
Cell Wall and Capsule;Capsular and extracellular polysacchrides;Sialic_Acid_Metabolism;N-acetylneuraminate synthase (EC 2.5.1.56)	0.788811	0.997777	0.0095567	0.00630291
Protein Metabolism;Protein processing and modification;N-linked_Glycosylation_in_Bacteria;4-amino-6-deoxy-N-Acetyl-D-hexosaminyl-(Lipid carrier) acetyltrasferase	0.151233	0.322313	0.00479711	0.00154576
Amino Acids and Derivatives;Aromatic amino acids and derivatives;Tryptophan_catabolism;4-hydroxy-2-oxovalerate aldolase (EC 4.1.3.-)	0.408268	0.617698	0.00730892	0.00408702
Cell Wall and Capsule;Gram-Negative cell wall components;Lipopolysaccharide-related_cluster_in_Alphaproteobacteria	0.812252	0.999985	0.0199834	0.0167693
Amino Acids and Derivatives;Arginine; urea cycle, polyamines;Arginine_Biosynthesis_extended;N-succinyl-L,L-diaminopimelate desuccinylase (EC 3.5.1.18)	0.0663532	0.178223	0.0404804	0.0372684
Nitrogen Metabolism;Allantoin_Utilization	0.355728	0.56955	0.0297103	0.0265165
Virulence;Type III, Type IV, Type VI, ESAT secretion systems;Type_IV_pilus;Two-component sensor PilS	0.669501	0.878592	0.0259823	0.0227891
Stress Response;Osmotic stress;Choline_and_Betaine_Uptake_and_Betaine_Biosynthesis;Glycine betaine ABC transport system, ATP-binding protein OpuAA (EC 3.6.3.32)	0.520663	0.730066	0.00909358	0.00591819
Cofactors, Vitamins, Prosthetic Groups, Pigments;Quinone cofactors;Menaquinone_Biosynthesis_via_Futalosine_--_gjo	0.844626	0.999985	0.0199473	0.0167853
Stress Response;Oxidative stress;Oxidative_stress	0.070895	0.186263	0.0693077	0.0661583
Carbohydrates;Monosaccharides;L-Arabinose_utilization;Transcriptional regulator of the arabinose operon in Shewanella, GntR family	0.0694553	0.183995	0.00881369	0.00568415
Virulence;Adhesion;Adhesins_in_Staphylococcus;Antiadhesin Pls, binding to squamous nasal epithelial cells	0.108856	0.254801	0.00481442	0.00172043
Plant-Prokaryote DOE project;Scaffold_proteins_for_[4Fe-4S]_cluster_assembly_(MRP_family)	0.270247	0.481897	0.0426878	0.0395961
Plant-Prokaryote DOE project;Scaffold_proteins_for_[4Fe-4S]_cluster_assembly_(MRP_family);Iron-sulfur cluster-binding protein	0.270247	0.481897	0.0426878	0.0395961
Cofactors, Vitamins, Prosthetic Groups, Pigments;Folate and pterines;Methanopterin_biosynthesis2;7,8 dihydropteroate synthase (methanopterin)	0.0036353	0.0183626	0.00551703	0.0024271
Carbohydrates;Central carbohydrate metabolism;Entner-Doudoroff_Pathway;6-phosphogluconolactonase (EC 3.1.1.31)	0.896816	0.999985	0.016176	0.0131276
Virulence;Iron Scavenging Mechanisms;Campylobacter_Iron_Metabolism	0.568959	0.782689	0.0414946	0.0384534
Regulation and Cell signaling;Programmed Cell Death and Toxin-antitoxin Systems;Fratricide_in_Streptococcus	0.89117	0.999985	0.00739548	0.00436215
Regulation and Cell signaling;Programmed Cell Death and Toxin-antitoxin Systems;Fratricide_in_Streptococcus;Choline binding protein D	0.89117	0.999985	0.00739548	0.00436215
Cell Division and Cell Cycle;Cell cycle in Prokaryota;MukBEF_Chromosome_Condensation	0.0648466	0.1754	0.00305716	2.7399e-05
Carbohydrates;Sugar alcohols;Inositol_catabolism;Myo-inositol 2-dehydrogenase 1 (EC 1.1.1.18)	0.821354	0.999985	0.0164674	0.0134438
Membrane Transport;Potassium_homeostasis;POTASSIUM/PROTON ANTIPORTER ROSB	0.290724	0.499775	0.0387101	0.0356963
Cofactors, Vitamins, Prosthetic Groups, Pigments;Biotin;Biotin_biosynthesis;Biotin-protein ligase (EC 6.3.4.15)	0.883107	0.999985	0.0174557	0.0144553
Carbohydrates;Central carbohydrate metabolism;Pyruvate_Alanine_Serine_Interconversions;L-serine dehydratase (EC 4.3.1.17)	0.835631	0.999985	0.0146149	0.0116263
Amino Acids and Derivatives;Glutamine, glutamate, aspartate, asparagine; ammonia assimilation;Glutamine_synthetases;Glutamine synthetase type I (EC 6.3.1.2)	0.326245	0.538703	0.0221706	0.0192341
Carbohydrates;Central carbohydrate metabolism;Entner-Doudoroff_Pathway;6-phosphogluconolactonase (EC 3.1.1.31), eukaryotic type	0.0643541	0.174559	0.00599602	0.00308125
Clustering-based subsystems;CBSS-176280.1.peg.1561;Ribonuclease BN (EC 3.1.-.-)	0.950735	0.999985	0.0199891	0.0170787
Clustering-based subsystems;CBSS-176280.1.peg.1561;A/G-specific adenine glycosylase (EC 3.2.2.-)	0.404029	0.614119	0.0214752	0.0185708
Respiration;Sodium Ion-Coupled Energetics;Na+_translocating_decarboxylases_and_related_biotin-dependent_enzymes;Methylmalonyl-CoA decarboxylase, beta chain (EC 4.1.1.41)	0.0379469	0.117127	0.02837	0.0254674
Motility and Chemotaxis;Flagellar motility in Prokaryota;Flagellum;Flagellin protein FlaA	0.405467	0.614184	0.0179823	0.0150832
Cofactors, Vitamins, Prosthetic Groups, Pigments;Tetrapyrroles;Coenzyme_B12_biosynthesis;Cob(I)alamin adenosyltransferase PduO (EC 2.5.1.17)	0.271519	0.482384	0.00940377	0.00652781
Stress Response;Osmotic stress;Osmoregulation	0.382558	0.595171	0.00605229	0.00319655
Stress Response;Osmotic stress;Osmoregulation;Aquaporin Z	0.382558	0.595171	0.00605229	0.00319655
Respiration;Biogenesis_of_c-type_cytochromes	0.374005	0.587329	0.0507368	0.047898
Protein Metabolism;Protein degradation;Serine_endopeptidase_(EC_3.4.21.-)	0.200513	0.394424	0.00848908	0.00565219
Protein Metabolism;Protein degradation;Serine_endopeptidase_(EC_3.4.21.-);Prolyl endopeptidase (EC 3.4.21.26)	0.200513	0.394424	0.00848908	0.00565219
Virulence;Resistance to antibiotics and toxic compounds;Beta-lactamase;Beta-lactamase repressor BlaI	0.812497	0.999985	0.0101756	0.00735663
Virulence;Resistance to antibiotics and toxic compounds;Cobalt-zinc-cadmium_resistance;Probable Co/Zn/Cd efflux system membrane fusion protein	0.143713	0.311432	0.00377853	0.000972665
Carbohydrates;Central carbohydrate metabolism;TCA_Cycle;Dihydrolipoamide dehydrogenase of pyruvate dehydrogenase complex (EC 1.8.1.4)	1.14076e-06	1.86841e-05	0.00366167	0.000874485
Amino Acids and Derivatives;Alanine, serine, and glycine;Glycine_and_Serine_Utilization;Phosphoserine phosphatase (EC 3.1.3.3)	0.853111	0.999985	0.0161442	0.0133616
Amino Acids and Derivatives;Lysine, threonine, methionine, and cysteine;Lysine_biosynthesis_AAA_pathway_2;N-acetyl-gamma-aminoadipyl-phosphate reductase (EC 1.2.1.-)	0.643268	0.85309	0.0125417	0.0097609
Amino Acids and Derivatives;Arginine; urea cycle, polyamines;Urea_decomposition;Eukaryotic-type low-affinity urea transporter	0.2496	0.457481	0.00574643	0.00297393
Cofactors, Vitamins, Prosthetic Groups, Pigments;Quinone cofactors;Menaquinone_and_Phylloquinone_Biosynthesis;1,4-dihydroxy-2-naphthoate octaprenyltransferase (EC 2.5.1.-)	0.949232	0.999985	0.0121392	0.0093796
Clustering-based subsystems;proteosome related	0.963943	0.999985	0.0151805	0.0124255
Clustering-based subsystems;proteosome related;Cluster-based_Subsystem_Grouping_Hypotheticals_-_perhaps_Proteosome_Related	0.963943	0.999985	0.0151805	0.0124255
Carbohydrates;Monosaccharides;D-ribose_utilization;Ribose 5-phosphate isomerase A (EC 5.3.1.6)	0.0192315	0.0691794	0.00540739	0.00265428
Cofactors, Vitamins, Prosthetic Groups, Pigments;Pyridoxine;Pyridoxin_(Vitamin_B6)_Biosynthesis;Pyridoxine 5'-phosphate synthase (EC 2.6.99.2)	0.297915	0.506259	0.00759458	0.00484506
Amino Acids and Derivatives;Arginine; urea cycle, polyamines;Arginine_Deiminase_Pathway;Arginine pathway regulatory protein ArgR, repressor of arg regulon	0.470871	0.678795	0.0180198	0.0152727
RNA Metabolism;RNA processing and modification;Methylthiotransferases;tRNA N6-threonylcarbamoyladenosine 2-methylthiotransferase (putative)	0.156326	0.329517	0.00318557	0.000455509
Clustering-based subsystems;EC699-706;Endonuclease VIII	3.77724e-10	1.30978e-08	0.00403101	0.00131744
Amino Acids and Derivatives;Lysine, threonine, methionine, and cysteine;Cysteine_Biosynthesis;Sulfite reductase [NADPH] flavoprotein alpha-component (EC 1.8.1.2)	0.137952	0.301348	0.0031596	0.000448659
Carbohydrates;Sugar alcohols;Ethanolamine_utilization	0.340584	0.552878	0.00367754	0.000995497
Nucleosides and Nucleotides;Purines;De_Novo_Purine_Biosynthesis;Phosphoribosylaminoimidazole carboxylase ATPase subunit (EC 4.1.1.21)	0.848698	0.999985	0.0143235	0.011648
Protein Metabolism;Protein biosynthesis;Universal_GTPases;Translation elongation factor 2	0.520538	0.730066	0.0284725	0.0257973
Stress Response;Osmotic stress;Choline_and_Betaine_Uptake_and_Betaine_Biosynthesis;Osmotically activated L-carnitine/choline ABC transporter, permease protein OpuCB	0.72577	0.936783	0.00785571	0.00519211
DNA Metabolism;DNA repair;DNA_Repair_Base_Excision;DNA-3-methyladenine glycosylase (EC 3.2.2.20)	0.297437	0.505668	0.0075513	0.00488844
Clustering-based subsystems;EC699-706	0.0176041	0.0647165	0.00555887	0.00291
Cofactors, Vitamins, Prosthetic Groups, Pigments;Lipoic acid	0.18382	0.370237	0.00685734	0.00421831
Cofactors, Vitamins, Prosthetic Groups, Pigments;Lipoic acid;Lipoic_acid_metabolism	0.18382	0.370237	0.00685734	0.00421831
Cofactors, Vitamins, Prosthetic Groups, Pigments;Lipoic acid;Lipoic_acid_metabolism;Octanoate-[acyl-carrier-protein]-protein-N-octanoyltransferase	0.18382	0.370237	0.00685734	0.00421831
Amino Acids and Derivatives;Alanine, serine, and glycine;Glycine_Biosynthesis;Low-specificity L-threonine aldolase (EC 4.1.2.5)	0.553454	0.765724	0.0185594	0.0159234
Cell Wall and Capsule;Capsular and extracellular polysacchrides;dTDP-rhamnose_synthesis;Glucose-1-phosphate cytidylyltransferase (EC 2.7.7.33)	0.568518	0.782689	0.00785716	0.00523549
Respiration;Electron donating reactions;Respiratory_dehydrogenases_1;Proline dehydrogenase (EC 1.5.99.8) (Proline oxidase)	0.291622	0.500307	0.0112058	0.008609
Nitrogen Metabolism;Nitrate_and_nitrite_ammonification;Respiratory nitrate reductase alpha chain (EC 1.7.99.4)	0.237576	0.441137	0.0028321	0.000239741
Plant-Prokaryote DOE project;Iron-sulfur_cluster_assembly	0.0313422	0.100782	0.0397965	0.0372238
Amino Acids and Derivatives;Proline and 4-hydroxyproline;Proline,_4-hydroxyproline_uptake_and_utilization;L-Proline/Glycine betaine transporter ProP	0.814426	0.999985	0.00342795	0.000866494
Clustering-based subsystems;Isoprenoid/cell wall biosynthesis: PREDICTED UNDECAPRENYL DIPHOSPHATE PHOSPHATASE;CBSS-83331.1.peg.3039;Penicillin-binding protein 3	0.937168	0.999985	0.0120902	0.009536
Carbohydrates;Monosaccharides;D-galactarate,_D-glucarate_and_D-glycerate_catabolism;D-galactarate permease	0.388714	0.602076	0.00500486	0.00245564
DNA Metabolism;YcfH;Putative deoxyribonuclease YjjV	0.382864	0.595171	0.00741135	0.00487132
Membrane Transport;SecY2-SecA2 specialized system	0.305939	0.515569	0.00474084	0.00220105
Membrane Transport;SecY2-SecA2 specialized system;SecY2-SecA2_Specialized_Transport_System	0.305939	0.515569	0.00474084	0.00220105
Phosphorus Metabolism;Phosphate_metabolism;Phosphate starvation-inducible protein PhoH, predicted ATPase	0.316678	0.527204	0.0273644	0.0248269
DNA Metabolism;DNA_structural_proteins,_bacterial	0.417442	0.625919	0.0212717	0.0187409
Amino Acids and Derivatives;Lysine, threonine, methionine, and cysteine;Lysine_biosynthesis_AAA_pathway_2	0.841208	0.999985	0.0209702	0.0184475
Respiration;Biogenesis_of_c-type_cytochromes;Cytochrome c-type biogenesis protein ResA	0.49715	0.707198	0.0225976	0.0200766
Stress Response;Oxidative stress;Glutathione:_Non-redox_reactions	0.102925	0.244694	0.033737	0.0312212
Fatty Acids, Lipids, and Isoprenoids;Fatty acids;Fatty_Acid_Biosynthesis_FASII;Biotin carboxyl carrier protein of acetyl-CoA carboxylase	0.642835	0.85309	0.00943263	0.00693081
Virulence;Resistance to antibiotics and toxic compounds;USS-DB-6;ABC-type transport system involved in resistance to organic solvents, permease component USSDB6A	0.0789352	0.20094	0.00611144	0.00361667
Cell Wall and Capsule;Capsular and extracellular polysacchrides;Phosphorylcholine_incorporation_in_LPS;Cholinephosphate cytidylyltransferase (EC 2.7.7.15)	0.049827	0.145816	0.00480721	0.00231407
Respiration;Electron donating reactions;Respiratory_Complex_I;NADH-ubiquinone oxidoreductase chain J (EC 1.6.5.3)	0.163671	0.338694	0.00408584	0.00161083
Carbohydrates;Fermentation;Fermentations:_Mixed_acid;Phosphoenolpyruvate carboxylase (EC 4.1.1.31)	0.00411828	0.0204006	0.00257962	0.000108454
Virulence;Adhesion;The_fimbrial_Sfm_cluster;Fimbriae-like adhesin SfmA	0.990548	0.999985	0.00239639	0
Virulence;Adhesion;Adhesins_in_Staphylococcus	0.412757	0.621558	0.0122272	0.00983168
DNA Metabolism;DNA_structural_proteins,_bacterial;Integration host factor alpha subunit	0.857504	0.999985	0.0138993	0.0115087
Phages, Prophages, Transposable elements;Bacteriophage integration/excision/lysogeny;Phage_integration_and_excision;Phage integrase	0.0244741	0.0832162	0.00257673	0.000199784
Clustering-based subsystems;CBSS-316057.3.peg.3521;Glutamate-ammonia-ligase adenylyltransferase (EC 2.7.7.42)	0.0507596	0.147675	0.00338755	0.00101491
Carbohydrates;Monosaccharides;L-Arabinose_utilization;Possible GPH family transporter (TC 2.A.2) for arabinosides	0.115609	0.265977	0.0302542	0.0278831
Cofactors, Vitamins, Prosthetic Groups, Pigments;Folate and pterines;Folate_Biosynthesis;Dihydrofolate reductase (EC 1.5.1.3)	0.080294	0.203726	0.0182492	0.0158812
Amino Acids and Derivatives;Lysine, threonine, methionine, and cysteine;Cysteine_Biosynthesis;Sulfate adenylyltransferase subunit 1 (EC 2.7.7.4)	0.456274	0.663718	0.0171397	0.0147761
Secondary Metabolism;Biosynthesis of phenylpropanoids	1.02267e-07	2.16279e-06	0.00351163	0.0011519
Metabolism of Aromatic Compounds;Aromatic_Amin_Catabolism	0.706514	0.915614	0.00925373	0.00689542
Carbohydrates;Monosaccharides;D-gluconate_and_ketogluconates_metabolism;Gluconate permease	0.770835	0.981139	0.00321298	0.000856219
Cofactors, Vitamins, Prosthetic Groups, Pigments;Pyridoxine;Pyridoxin_(Vitamin_B6)_Biosynthesis;Pyridoxamine 5'-phosphate oxidase (EC 1.4.3.5)	0.270932	0.482116	0.00637546	0.00402195
Metabolism of Aromatic Compounds;Gentisare_degradation	0.390406	0.603002	0.00627447	0.00392377
Metabolism of Aromatic Compounds;Gentisare_degradation;putative 4-hydroxybenzoyl-CoA thioesterase	0.390406	0.603002	0.00627447	0.00392377
Miscellaneous;Muconate_lactonizing_enzyme_family;Muconate cycloisomerase (EC 5.5.1.1)	0.397896	0.610616	0.00862037	0.00627666
RNA Metabolism;RNA processing and modification;Queuosine-Archaeosine_Biosynthesis	0	0	0.177453	0.175109
Stress Response;Cold shock	0.144105	0.311432	0.00556176	0.0032308
Stress Response;Cold shock;Cold_shock,_CspA_family_of_proteins	0.144105	0.311432	0.00556176	0.0032308
Stress Response;Cold shock;Cold_shock,_CspA_family_of_proteins;Cold shock protein CspB	0.115407	0.265977	0.00533092	0.00300248
Carbohydrates;Central carbohydrate metabolism;Pyruvate_Alanine_Serine_Interconversions;Serine transporter	0.989753	0.999985	0.00232137	0
Respiration;Electron donating reactions;Respiratory_Complex_I;NADH-ubiquinone oxidoreductase chain F (EC 1.6.5.3)	0.952745	0.999985	0.0171282	0.0148217
Carbohydrates;Aminosugars;Chitin_and_N-acetylglucosamine_utilization;Chitinase (EC 3.2.1.14)	0.93482	0.999985	0.0287466	0.0264423
RNA Metabolism;RNA processing and modification;Ribonuclease_H;Ribonuclease HI (EC 3.1.26.4)	0.102247	0.243933	0.00721369	0.00491013
Photosynthesis;Proteorhodopsin;Lycopene beta cyclase (EC 1.14.-.-)	0.020675	0.0729406	0.00377709	0.00148525
Cofactors, Vitamins, Prosthetic Groups, Pigments;Folate and pterines;5-FCL-like_protein	0.43983	0.646641	0.00808799	0.00580745
Cofactors, Vitamins, Prosthetic Groups, Pigments;Folate and pterines;5-FCL-like_protein;Glutamate formiminotransferase (EC 2.1.2.5)	0.43983	0.646641	0.00808799	0.00580745
Carbohydrates;Di- and oligosaccharides;Beta-Glucoside_Metabolism;Periplasmic beta-glucosidase (EC 3.2.1.21)	0.324438	0.53636	0.00239639	0.000131287
Cell Wall and Capsule;Capsular and extracellular polysacchrides;Colanic_acid_biosynthesis;GDP-mannose 4,6-dehydratase (EC 4.2.1.47)	0.48841	0.698324	0.0203859	0.0181256
Stress Response;Osmotic stress;Choline_and_Betaine_Uptake_and_Betaine_Biosynthesis;Choline dehydrogenase (EC 1.1.99.1)	0.446937	0.654341	0.00554589	0.00329245
Cell Wall and Capsule;Gram-Negative cell wall components;KDO2-Lipid_A_biosynthesis;Oligosaccharide repeat unit polymerase Wzy	0.96054	0.999985	0.00852514	0.00628122
Carbohydrates;Central carbohydrate metabolism;Entner-Doudoroff_Pathway;Gluconate dehydratase (EC 4.2.1.39)	0.421355	0.629335	0.00457493	0.00233234
Respiration;Electron donating reactions;Formate_dehydrogenase;Formate dehydrogenase N alpha subunit (EC 1.2.1.2)	0.992168	0.999985	0.00224057	0
Amino Acids and Derivatives;Arginine; urea cycle, polyamines;Arginine_Deiminase_Pathway;Arginine/ornithine antiporter ArcD	0.789356	0.997777	0.0132415	0.011003
Respiration;Electron accepting reactions;Anaerobic_respiratory_reductases;Anaerobic dimethyl sulfoxide reductase chain A (EC 1.8.99.-)	0.255447	0.464587	0.00571036	0.00347625
Amino Acids and Derivatives;Aromatic amino acids and derivatives;Indole-pyruvate_oxidoreductase_complex;Indolepyruvate oxidoreductase subunit IorB (EC 1.2.7.8)	0.393873	0.606048	0.00646059	0.00423886
Virulence;Iron Scavenging Mechanisms;Siderophore_Yersiniabactin_Biosynthesis;iron aquisition yersiniabactin synthesis enzyme (Irp1,polyketide synthetase)	0.708572	0.917663	0.00235166	0.00013357
Nitrogen Metabolism;Allantoin_Utilization;Negative regulator of allantoin and glyoxylate utilization operons	0.027023	0.0901314	0.00454319	0.00233234
Protein Metabolism;Protein processing and modification;N-linked_Glycosylation_in_Bacteria;Alpha-1,3-N-acetylgalactosamine transferase PglA (EC 2.4.1.-)	0.644379	0.853632	0.0101338	0.00792402
Clustering-based subsystems;Biosynthesis of galactoglycans and related lipopolysacharides;CBSS-376686.6.peg.291	0.55322	0.765676	0.0071733	0.00497749
Clustering-based subsystems;Biosynthesis of galactoglycans and related lipopolysacharides;CBSS-376686.6.peg.291;Apolipoprotein N-acyltransferase (EC 2.3.1.-)	0.55322	0.765676	0.0071733	0.00497749
Sulfur Metabolism;Organic sulfur assimilation;Taurine_Utilization	0.92313	0.999985	0.00613597	0.00394546
Clustering-based subsystems;CBSS-316057.3.peg.3521;Large exoproteins involved in heme utilization or adhesion	0.939141	0.999985	0.0177053	0.0155478
Amino Acids and Derivatives;Aromatic amino acids and derivatives;Aromatic_amino_acid_degradation	0.732782	0.943356	0.00966779	0.0075119
Carbohydrates;Sugar_utilization_in_Thermotogales;Alpha-xylosidase (EC 3.2.1.-)	0.0312468	0.100559	0.160027	0.157873
Carbohydrates;Monosaccharides;Mannose_Metabolism;Transcriptional regulator of mannoside utilization, variant 2, LacI family	0.689267	0.899318	0.00598592	0.00383586
Cofactors, Vitamins, Prosthetic Groups, Pigments;Thiamin_biosynthesis	0.138498	0.302239	0.0858848	0.0837439
Amino Acids and Derivatives;Branched-chain amino acids;Branched_chain_amino_acid_degradation_regulons	0.162616	0.337598	0.0519155	0.049776
Cell Division and Cell Cycle;Cell cycle in Prokaryota;MukBEF_Chromosome_Condensation;Chromosome partition protein MukB	0.0742142	0.192487	0.00213814	2.7399e-05
Clustering-based subsystems;CBSS-176280.1.peg.1561;ThiJ/PfpI family protein	0.0743588	0.192602	0.0179635	0.0158937
Fatty Acids, Lipids, and Isoprenoids;Fatty acids;Fatty_Acid_Biosynthesis_FASII;3-oxoacyl-[acyl-carrier-protein] synthase, KASIII (EC 2.3.1.41)	0.230527	0.432197	0.0326968	0.0306275
Amino Acids and Derivatives;Arginine; urea cycle, polyamines;Putrescine_utilization_pathways;Gamma-glutamyl-putrescine oxidase (EC1.4.3.-)	0.033346	0.106249	0.00336302	0.00130031
Cofactors, Vitamins, Prosthetic Groups, Pigments;Tetrapyrroles;Heme_and_Siroheme_Biosynthesis;Uroporphyrinogen-III synthase, divergent, Flavobacterial type (EC 4.2.1.75)	0.565304	0.779318	0.00566708	0.00360868
Miscellaneous;ZZ_gjo_need_homes;Tyrosine-specific transport protein	0.984933	0.999985	0.00203715	0
Clustering-based subsystems;proteosome related;Cluster-based_Subsystem_Grouping_Hypotheticals_-_perhaps_Proteosome_Related;Twin-arginine translocation protein TatC	0.860681	0.999985	0.0109316	0.00889669
Fatty Acids, Lipids, and Isoprenoids;Fatty acids;Fatty_Acid_Biosynthesis_FASII;3-oxoacyl-[acyl-carrier-protein] synthase, KASI (EC 2.3.1.41)	0.55973	0.773018	0.00827267	0.00626638
Cofactors, Vitamins, Prosthetic Groups, Pigments;Riboflavin, FMN, FAD;riboflavin_to_FAD	0.0837673	0.210732	0.0379325	0.0359281
Virulence;Iron Scavenging Mechanisms;Campylobacter_Iron_Metabolism;Ferric siderophore transport system, biopolymer transport protein ExbB	0.935247	0.999985	0.0165208	0.0145181
Stress Response;Periplasmic Stress	0.542606	0.753696	0.0546409	0.0526461
Stress Response;Periplasmic Stress;Periplasmic_Stress_Response	0.542606	0.753696	0.0546409	0.0526461
Membrane Transport;Transport_of_Manganese	0.832424	0.999985	0.0131102	0.011116
Clustering-based subsystems;Cell_wall_related_cluster;FIG004655: Polysaccharide deacetylase	0.115747	0.265977	0.0049082	0.00291457
Carbohydrates;Monosaccharides;D-Galacturonate_and_D-Glucuronate_Utilization;Mannonate dehydratase (EC 4.2.1.8)	0.11367	0.263247	0.0302816	0.0282975
Virulence;Quorum sensing and biofilm formation	0.29141	0.500307	0.0568526	0.0548757
Carbohydrates;Organic acids;Glycerate_metabolism;Hydroxypyruvate isomerase (EC 5.3.1.22)	0.000110839	0.00100873	0.00289846	0.000929283
Virulence;Resistance to antibiotics and toxic compounds;Polymyxin_Synthetase_Gene_Cluster_in_Bacillus	0.794592	0.999985	0.00979475	0.00783041
Virulence;Resistance to antibiotics and toxic compounds;Polymyxin_Synthetase_Gene_Cluster_in_Bacillus;Polymyxin synthetase PmxA	0.794592	0.999985	0.00979475	0.00783041
Membrane Transport;ABC transporters;ABC_transporter_dipeptide_(TC_3.A.1.5.2);Dipeptide transport system permease protein DppB (TC 3.A.1.5.2)	0.610303	0.821349	0.00883966	0.00688743
Carbohydrates;Central carbohydrate metabolism;Dehydrogenase_complexes;Dihydrolipoamide acetyltransferase component of pyruvate dehydrogenase complex (EC 2.3.1.12)	0.0565552	0.159707	0.00287105	0.000923575
RNA Metabolism;RNA processing and modification;16S_rRNA_modification_within_P_site_of_ribosome;Cell division protein MraZ	0.49327	0.703705	0.00705067	0.00511562
RNA Metabolism;RNA processing and modification;tRNA_modification_Bacteria;tRNA-dihydrouridine synthase C (EC 1.-.-.-)	0.572709	0.784726	0.00635671	0.00442266
Stress Response;Oxidative stress;Glutaredoxins	0.00016506	0.0013963	0.00276573	0.000837953
Carbohydrates;Central carbohydrate metabolism;Dehydrogenase_complexes;Dihydrolipoamide dehydrogenase of branched-chain alpha-keto acid dehydrogenase (EC 1.8.1.4)	0.957569	0.999985	0.00317691	0.00125236
Nitrogen Metabolism;Nitrate_and_nitrite_ammonification;Cytochrome c-type protein NapC	0.0145822	0.056131	0.00348566	0.00156517
Nucleosides and Nucleotides;Pyrimidines;pyrimidine_conversions;Thymidylate synthase (EC 2.1.1.45)	0.644493	0.853632	0.0149439	0.0130271
Protein Metabolism;Protein biosynthesis;Translation_elongation_factor_G_family;Tetracycline resistance protein TetO	0.903523	0.999985	0.00616771	0.00425255
Cell Wall and Capsule;UDP-N-acetylmuramate_from_Fructose-6-phosphate_Biosynthesis	0.253299	0.462499	0.0577586	0.0558438
Plant-Prokaryote DOE project;Synechocystis_experimental;Lysophospholipase L2 (EC 3.1.1.5)	0.120529	0.274182	0.00320865	0.00131173
Clustering-based subsystems;CBSS-312309.3.peg.1965;[Protein-PII] uridylyltransferase (EC 2.7.7.59)	0.069855	0.184792	0.00272966	0.000839095
Virulence;Resistance to antibiotics and toxic compounds;Copper_homeostasis;Cytochrome c heme lyase subunit CcmF	0.0678379	0.181285	0.00293742	0.00105144
Nitrogen Metabolism;Denitrification;Nitrous oxide reductase maturation transmembrane protein NosY	0.823267	0.999985	0.00737528	0.0054935
Carbohydrates;Di- and oligosaccharides;Maltose_and_Maltodextrin_Utilization;Maltoporin (maltose/maltodextrin high-affinity receptor, phage lambda receptor protein)	0.990063	0.999985	0.00188133	0
Motility and Chemotaxis;Flagellar motility in Prokaryota;Flagellum;Flagellar biosynthesis protein FlhA	0.672907	0.881859	0.00706221	0.00518298
Stress Response;Oxidative stress;Oxidative_stress;Ferroxidase (EC 1.16.3.1)	0.111936	0.260486	0.00458647	0.00270794
Membrane Transport;ABC transporters;ABC_transporter_dipeptide_(TC_3.A.1.5.2);Dipeptide-binding ABC transporter, periplasmic substrate-binding component (TC 3.A.1.5.2)	0.41422	0.62302	0.0130222	0.011148
Carbohydrates;Central carbohydrate metabolism;Dehydrogenase_complexes;Cytosol aminopeptidase PepA (EC 3.4.11.1)	0.0472657	0.139943	0.00255076	0.0007021
Cell Wall and Capsule;Capsular and extracellular polysacchrides;Sialic_Acid_Metabolism;Transcriptional regulator NanR	0.129068	0.286165	0.00318412	0.00135054
Clustering-based subsystems;Carbohydrates;Unknown_carbohydrate_utilization_(_cluster_Ydj_);Peptide methionine sulfoxide reductase MsrB (EC 1.8.4.12)	0.703312	0.912986	0.00913831	0.0073064
Respiration;Electron accepting reactions;trimethylamine_N-oxide_(TMAO)_reductase;Functional role page for Cytochrome c-type protein TorC	0.0694489	0.183995	0.00221749	0.000389294
Amino Acids and Derivatives;Lysine, threonine, methionine, and cysteine;Methionine_Biosynthesis;Betaine--homocysteine S-methyltransferase (EC 2.1.1.5)	0.0504967	0.147021	0.00243246	0.000617619
Virulence;Resistance to antibiotics and toxic compounds;Cobalt-zinc-cadmium_resistance;DNA-binding heavy metal response regulator	0.47705	0.684881	0.0189028	0.017089
Respiration;Formate_hydrogenase	0.0163099	0.0611264	0.0428912	0.0410803
Cofactors, Vitamins, Prosthetic Groups, Pigments;Folate and pterines;Folate_Biosynthesis;Transaldolase (EC 2.2.1.2)	0.46625	0.675369	0.0119271	0.0101182
Plant-Prokaryote DOE project;Experimental-Ubiquinone_BiosynthesisVDC;Ubiquinone biosynthesis monooxygenase UbiB	0.193615	0.385328	0.00510585	0.00330158
Cell Wall and Capsule;Gram-Positive cell wall components;Teichoic_and_lipoteichoic_acids_biosynthesis;CDP-glycerol: N-acetyl-beta-D-mannosaminyl-1,4-N-acetyl-D-glucosaminyldiphosphoundecaprenyl glycerophosphotransferase	0.412294	0.621346	0.00394301	0.00214169
Cell Wall and Capsule;Gram-Negative cell wall components;KDO2-Lipid_A_biosynthesis;O-antigen flippase Wzx	0.260951	0.470044	0.0637792	0.0619788
Membrane Transport;Lipoprotein sorting;Lipoprotein_sorting_system;Lipoprotein releasing system ATP-binding protein LolD	0.643693	0.85316	0.0207884	0.0189909
Stress Response;Universal_stress_protein_family	0.363613	0.576895	0.00484905	0.00305156
Carbohydrates;Sugar alcohols;Glycerol_and_Glycerol-3-phosphate_Uptake_and_Utilization;Glycerol-3-phosphate regulon repressor, DeoR family	0.441462	0.648297	0.00468457	0.00288831
Clustering-based subsystems;CBSS-312309.3.peg.1965;Methionine aminopeptidase (EC 3.4.11.18)	0.0227785	0.0787023	0.0281536	0.026359
Cofactors, Vitamins, Prosthetic Groups, Pigments;Biotin;Biotin_biosynthesis;Dethiobiotin synthetase (EC 6.3.3.3)	0.361962	0.575937	0.00580414	0.00403679
Sulfur Metabolism;Thioredoxin-disulfide_reductase;Thiol peroxidase, Tpx-type (EC 1.11.1.15)	0.146237	0.314625	0.00429503	0.00253098
Carbohydrates;Organic acids;Glycerate_metabolism;D-glycerate transporter (predicted)	0.850663	0.999985	0.00555455	0.00379933
Stress Response;Oxidative stress;Protection_from_Reactive_Oxygen_Species;Superoxide dismutase [Fe] (EC 1.15.1.1)	0.303496	0.512672	0.00501208	0.0032582
Membrane Transport;Potassium_homeostasis;Potassium-transporting ATPase A chain (EC 3.6.3.12) (TC 3.A.3.7.1)	0.777873	0.987962	0.0194842	0.0177443
RNA Metabolism;RNA processing and modification;Queuosine-Archaeosine_Biosynthesis;Hydrolase (HAD superfamily) in cluster with DUF1447	0.114123	0.26366	0.0604407	0.0587069
Respiration;Electron accepting reactions;trimethylamine_N-oxide_(TMAO)_reductase;Trimethylamine-N-oxide reductase (EC 1.6.6.9)	0.0954505	0.231892	0.00378719	0.00205607
Potassium metabolism;Glutathione-regulated_potassium-efflux_system_and_associated_functions;Glutathione-regulated potassium-efflux system ancillary protein KefG	0.0630768	0.172176	0.00314661	0.00142589
Clustering-based subsystems;Methylamine utilization;Glutamate-mediated_methylamine_utilization_pathway;Formyltetrahydrofolate deformylase (EC 3.5.1.10)	0.461049	0.669147	0.00565987	0.00394317
Stress Response;Periplasmic Stress;Periplasmic_Stress_Response;Outer membrane stress sensor protease DegQ, serine protease	0.0658188	0.177407	0.0031192	0.00140877
Metabolism of Aromatic Compounds;Metabolism of central aromatic intermediates;Protocatechuate_branch_of_beta-ketoadipate_pathway	0.591229	0.804305	0.00692082	0.00522065
Carbohydrates;Monosaccharides;Mannose_Metabolism;Endo-alpha-mannosidase	0.0368882	0.11478	0.00223192	0.00055483
Metabolism of Aromatic Compounds;Metabolism of central aromatic intermediates;Protocatechuate_branch_of_beta-ketoadipate_pathway;4-carboxymuconolactone decarboxylase (EC 4.1.1.44)	0.614207	0.825193	0.00688475	0.00521152
Carbohydrates;Central carbohydrate metabolism;Pyruvate_metabolism_I:_anaplerotic_reactions,_PEP;Aerobic C4-dicarboxylate transporter for fumarate, L-malate, D-malate, succunate, aspartate	0.518902	0.728769	0.00461388	0.00294197
Respiration;Sodium Ion-Coupled Energetics	0.0271448	0.0903027	0.0931966	0.0915298
Respiration;Sodium Ion-Coupled Energetics;Na+_translocating_decarboxylases_and_related_biotin-dependent_enzymes	0.0271448	0.0903027	0.0931966	0.0915298
Virulence;Type III, Type IV, Type VI, ESAT secretion systems;Type_III_secretion_system;Type III secretion thermoregulatory protein (LcrF,VirF,transcription regulation of virulence plasmid)	0.515414	0.725941	0.0318802	0.0302143
Phosphorus Metabolism;Phosphate_metabolism;Phosphate transport ATP-binding protein PstB (TC 3.A.1.7.1)	0.294568	0.502734	0.0158889	0.0142281
Protein Metabolism;Protein folding;Periplasmic_disulfide_interchange;Cytochrome c-type biogenesis protein DsbD, protein-disulfide reductase (EC 1.8.1.8)	0.569797	0.783547	0.0243635	0.0227138
RNA Metabolism;RNA processing and modification;Methylthiotransferases;MiaB family protein, possibly involved in tRNA or rRNA modification	0.033781	0.107168	0.0286528	0.0270063
Carbohydrates;Fermentation;Acetone_Butanol_Ethanol_Synthesis	0.250042	0.458073	0.0181944	0.0165627
Carbohydrates;Aminosugars;N-Acetyl-Galactosamine_and_Galactosamine_Utilization;Transcriptional repressor of aga operon	0.344375	0.557166	0.00201118	0.000382445
Carbohydrates;Monosaccharides;L-Arabinose_utilization;Arabinose operon protein AraM	0.123136	0.277815	0.00230983	0.000684975
Virulence;Type III, Type IV, Type VI, ESAT secretion systems;Type_4_conjugative_transfer_system,_IncI1_type	0.908124	0.999985	0.00164617	3.19655e-05
Clustering-based subsystems;Putrescine/GABA utilization cluster-temporal,to add to SSs	0.199685	0.393743	0.0265377	0.0249285
Clustering-based subsystems;Putrescine/GABA utilization cluster-temporal,to add to SSs;GABA_and_putrescine_metabolism_from_cluters	0.199685	0.393743	0.0265377	0.0249285
Cofactors, Vitamins, Prosthetic Groups, Pigments;Quinone cofactors;Menaquinone_and_Phylloquinone_Biosynthesis	0.353665	0.567663	0.0387938	0.0371885
RNA Metabolism;RNA processing and modification;RNA_pseudouridine_syntheses;Ribosomal large subunit pseudouridine synthase B (EC 4.2.1.70)	0.44947	0.656551	0.0165684	0.0149998
Cell Wall and Capsule;Capsular and extracellular polysacchrides;Extracellular_Polysaccharide_Biosynthesis_of_Streptococci;Polysaccharide biosynthesis glycosyl transferase CpsJ	0.20516	0.399226	0.00226943	0.000700958
Cell Wall and Capsule;Capsular and extracellular polysacchrides;Exopolysaccharide_Biosynthesis;Glycosyl transferase, group 1 family protein	0.883836	0.999985	0.00999962	0.00843775
Carbohydrates;Central carbohydrate metabolism;Glycolysis_and_Gluconeogenesis;Phosphoenolpyruvate synthase (EC 2.7.9.2)	0.398524	0.611104	0.00443209	0.00287119
Nitrogen Metabolism;Allantoin_Utilization;Glyoxylate carboligase (EC 4.1.1.47)	0.0547282	0.156152	0.00159134	3.99569e-05
Carbohydrates;Fermentation;Fermentations:_Mixed_acid;Formate efflux transporter (TC 2.A.44 family)	0.881438	0.999985	0.00463119	0.00308011
Amino Acids and Derivatives;Lysine, threonine, methionine, and cysteine;Cysteine_Biosynthesis;Cystathionine gamma-lyase (EC 4.4.1.1)	0.618948	0.829241	0.00322596	0.00169189
Amino Acids and Derivatives;Lysine, threonine, methionine, and cysteine;Cysteine_Biosynthesis;Sulfate adenylyltransferase subunit 2 (EC 2.7.7.4)	0.623522	0.833024	0.00992316	0.0083978
Amino Acids and Derivatives;Aromatic amino acids and derivatives;Chorismate:_Intermediate_for_synthesis_of_PAPA_antibiotics,_PABA,_anthranilate,_3-hydroxyanthranilate_and_more.	0.404467	0.614119	0.0141403	0.012615
Protein Metabolism;Protein folding;Peptidyl-prolyl_cis-trans_isomerase	0.438534	0.645228	0.0999082	0.0983841
Carbohydrates;Organic acids;Propionyl-CoA_to_Succinyl-CoA_Module	0.282497	0.49209	0.00390549	0.00238942
Carbohydrates;Organic acids;Propionyl-CoA_to_Succinyl-CoA_Module;Methylmalonyl-CoA epimerase (EC 5.1.99.1)	0.282497	0.49209	0.00390549	0.00238942
Cofactors, Vitamins, Prosthetic Groups, Pigments;Tetrapyrroles;Cobalamin_synthesis;Cobalt-precorrin-8x methylmutase (EC 5.4.1.2)	0.826819	0.999985	0.0105464	0.0090314
Regulation and Cell signaling;DNA-binding_regulatory_proteins,_strays;Hydrogen peroxide-inducible genes activator	0.0237547	0.0814176	0.0268075	0.0252973
DNA Metabolism;DNA replication;DNA-replication;Replicative DNA helicase (EC 3.6.1.-)	0.389119	0.602192	0.00381027	0.00230494
Amino Acids and Derivatives;Branched-chain amino acids;Branched_chain_amino_acid_degradation_regulons;Hydroxymethylglutaryl-CoA lyase (EC 4.1.3.4)	0.190539	0.380782	0.00406131	0.0025561
DNA Metabolism;DNA replication;Plasmid_replication;Plasmid replication protein RepA	0.703292	0.912986	0.0015495	4.5665e-05
Virulence;Quorum sensing and biofilm formation;Symbiotic_colonization_and_sigma-dependent_biofilm_formation_gene_cluster;Glycosyltransferase SypP	0.0238461	0.0816581	0.00342939	0.00192592
Respiration;Electron donating reactions;Respiratory_dehydrogenases_1;NADH dehydrogenase (EC 1.6.99.3)	0.85669	0.999985	0.0171412	0.015638
Virulence;Iron Scavenging Mechanisms;Siderophore_Yersiniabactin_Biosynthesis;iron aquisition yersiniabactin synthesis enzyme (Irp2)	0.280479	0.491116	0.00910801	0.00761578
Carbohydrates;Monosaccharides;D-galactarate,_D-glucarate_and_D-glycerate_catabolism;Glucarate dehydratase (EC 4.2.1.40)	0.566535	0.780735	0.00162452	0.000144986
Membrane Transport;SecY2-SecA2 specialized system;SecY2-SecA2_Specialized_Transport_System;Protein export cytoplasm protein SecA2 ATPase RNA helicase (TC 3.A.5.1.1)	0.297142	0.505392	0.00311199	0.00164052
Respiration;Electron donating reactions;Formate_dehydrogenase;Formate dehydrogenase O beta subunit (EC 1.2.1.2)	0.00197652	0.0113847	0.00163751	0.000166677
Carbohydrates;Uncharacterized_sugar_kinase_cluster_(ygc)	0.287275	0.495951	0.00177457	0.000312805
Clustering-based subsystems;CBSS-176280.1.peg.1561;Transporter associated with VraSR	0.989331	0.999985	0.00145572	0
Stress Response;Oxidative stress;Glutathione:_Non-redox_reactions;Glutathione S-transferase (EC 2.5.1.18)	0.527862	0.737474	0.00261857	0.00117131
Nucleosides and Nucleotides;Ribonucleotide_reduction;Ribonucleotide reductase of class Ia (aerobic), alpha subunit (EC 1.17.4.1)	0.140787	0.306672	0.00147015	4.10985e-05
Virulence;Toxins and superantigens	0.887845	0.999985	0.00353038	0.00210173
Amino Acids and Derivatives;Aromatic amino acids and derivatives;Aromatic_amino_acid_degradation;5-carboxymethyl-2-oxo-hex-3- ene-1,7-dioate decarboxylase (EC 4.1.1.68)	0.542246	0.753696	0.00420991	0.00278214
Stress Response;Oxidative stress;Glutathione:_Non-redox_reactions;Glutathione S-transferase, omega (EC 2.5.1.18)	0.87086	0.999985	0.00235455	0.000928142
Carbohydrates;Central carbohydrate metabolism;Pyruvate_metabolism_II:_acetyl-CoA,_acetogenesis_from_pyruvate	0.542833	0.753739	0.00749214	0.00607116
Carbohydrates;Di- and oligosaccharides;Sucrose_utilization;PTS system, sucrose-specific IIC component (EC 2.7.1.69)	0.40972	0.618368	0.00219296	0.00077288
Respiration;Electron accepting reactions;Anaerobic_respiratory_reductases;heterodisulfide reductase, subunit A/methylviologen reducing hydrogenase, subunit delta	0.602936	0.815139	0.00341496	0.00200355
Stress Response;Acid stress;Acid_resistance_mechanisms;Probable glutamate/gamma-aminobutyrate antiporter	0.0587393	0.164308	0.00274553	0.00133799
Virulence;Resistance to antibiotics and toxic compounds;Beta-lactamase;Beta-lactamase (EC 3.5.2.6)	0.0061458	0.0285346	0.033372	0.0319735
Carbohydrates;Central carbohydrate metabolism;Dehydrogenase_complexes;2-oxoglutarate dehydrogenase E1 component (EC 1.2.4.2)	0.101004	0.242036	0.00217854	0.000785438
Cell Wall and Capsule;Capsular and extracellular polysacchrides;Sialic_Acid_Metabolism;N-acetylglucosamine-6-phosphate deacetylase (EC 3.5.1.25)	0.340199	0.5525	0.0343011	0.0329188
Carbohydrates;Central carbohydrate metabolism;Dehydrogenase_complexes;Pyruvate dehydrogenase E1 component (EC 1.2.4.1)	0.989996	0.999985	0.0013807	0
Carbohydrates;One-carbon Metabolism;Serine-glyoxylate_cycle;Formiminotetrahydrofolate cyclodeaminase (EC 4.3.1.4)	0.72265	0.933383	0.00882956	0.00744911
Carbohydrates;Monosaccharides;L-fucose_utilization_temp;Possible alternative L-fucose mutarotase	0.368598	0.582643	0.00420414	0.00282552
Amino Acids and Derivatives;Alanine, serine, and glycine;Glycine_cleavage_system;Glycine cleavage system H protein	0.242744	0.44833	0.00380162	0.00243052
Clustering-based subsystems;Flagella protein?	0.955079	0.999985	0.00980918	0.00844004
Clustering-based subsystems;Flagella protein?;CBSS-323098.3.peg.2823	0.955079	0.999985	0.00980918	0.00844004
Clustering-based subsystems;Flagella protein?;CBSS-323098.3.peg.2823;Flagellar motor rotation protein MotB	0.955079	0.999985	0.00980918	0.00844004
Amino Acids and Derivatives;Lysine, threonine, methionine, and cysteine;Threonine_anaerobic_catabolism_gene_cluster	9.79661e-09	2.56511e-07	0.00151632	0.000150695
Secondary Metabolism;Biosynthesis of phenylpropanoids;Tannin_biosynthesis	0.0298353	0.0974321	0.00232281	0.000957824
Secondary Metabolism;Biosynthesis of phenylpropanoids;Tannin_biosynthesis;Dihydroflavonol-4-reductase (EC 1.1.1.219)	0.0298353	0.0974321	0.00232281	0.000957824
Membrane Transport;Lipoprotein sorting;Lipoprotein_sorting_system;Outer membrane lipoprotein LolB precursor	0.164071	0.339338	0.00151055	0.000149553
Stress Response;Oxidative stress;Glutathione:_Biosynthesis_and_gamma-glutamyl_cycle	0.20281	0.39674	0.00166204	0.000301389
Amino Acids and Derivatives;Glutamine, glutamate, aspartate, asparagine; ammonia assimilation;Glutamine,_Glutamate,_Aspartate_and_Asparagine_Biosynthesis;Asparagine synthetase [glutamine-hydrolyzing] (EC 6.3.5.4) AsnH	0.189907	0.379778	0.00229684	0.000940699
Sulfur Metabolism;Organic sulfur assimilation;Alkanesulfonates_Utilization;Alkanesulfonates ABC transporter ATP-binding protein	0.792739	0.999985	0.00393435	0.00258007
Nitrogen Metabolism;Allantoin_Utilization;DNA-binding transcriptional activator of the allD operon	0.990531	0.999985	0.0013504	0
Clustering-based subsystems;Conjugative_transfer_related_cluster;IncW plasmid conjugative relaxase protein TrwC (TraI homolog)	0.74613	0.955871	0.00135473	5.70813e-06
Carbohydrates;CO2 fixation;Photorespiration_(oxidative_C2_cycle)	0.159329	0.333407	0.00275563	0.00140991
Carbohydrates;CO2 fixation;Photorespiration_(oxidative_C2_cycle);2-oxoglutarate/malate translocator	0.159329	0.333407	0.00275563	0.00140991
Protein Metabolism;Protein processing and modification;N-linked_Glycosylation_in_Bacteria;Alpha-1,4-N-acetylgalactosamine transferase PglH (EC 2.4.1.-)	0.96195	0.999985	0.00162164	0.000283123
Amino Acids and Derivatives;Lysine, threonine, methionine, and cysteine;Methionine_Biosynthesis;Cystathionine gamma-synthase (EC 2.5.1.48)	0.814253	0.999985	0.00359386	0.00226613
Carbohydrates;Sugar alcohols;Propanediol_utilization	0.373472	0.586732	0.00437871	0.00305385
Cell Wall and Capsule;Gram-Negative cell wall components;Outer_membrane;Outer membrane protein C precursor	0.993011	0.999985	0.00132299	0
Clustering-based subsystems;Spore_Coat;Spore coat protein A	0.193814	0.385524	0.0013504	3.08239e-05
Clustering-based subsystems;Choline bitartrate degradation, putative	0.224465	0.424189	0.00163895	0.000320797
Clustering-based subsystems;Choline bitartrate degradation, putative;CBSS-344610.3.peg.2335	0.224465	0.424189	0.00163895	0.000320797
Phosphorus Metabolism;Phosphate_metabolism;Low-affinity inorganic phosphate transporter	0.989494	0.999985	0.00131434	0
Amino Acids and Derivatives;Aromatic amino acids and derivatives;Common_Pathway_For_Synthesis_of_Aromatic_Compounds_(DAHP_synthase_to_chorismate);Transcriptional repressor protein TyrR	0.356179	0.570034	0.00221605	0.000903026
Clustering-based subsystems;Carbohydrates;Unknown_carbohydrate_utilization_(_cluster_Ydj_)	0.29526	0.503079	0.0156407	0.014332
Cofactors, Vitamins, Prosthetic Groups, Pigments;Biotin;Biotin_biosynthesis;Biotin synthesis protein bioH	0.255461	0.464587	0.00327935	0.00197844
Virulence;Toxins and superantigens;SLO-NADGH_Locus	0.313862	0.525146	0.00340198	0.00210173
Virulence;Toxins and superantigens;SLO-NADGH_Locus;Streptolysin O	0.313862	0.525146	0.00340198	0.00210173
Cofactors, Vitamins, Prosthetic Groups, Pigments;Tetrapyrroles;Cobalamin_synthesis;Cobalt-precorrin-6x reductase (EC 1.3.1.54)	0.468204	0.67647	0.0154402	0.014147
Motility and Chemotaxis;Flagellar motility in Prokaryota;Flagellum;Flagellar biosynthesis protein FlhB	0.612897	0.823974	0.00447538	0.00318399
Cofactors, Vitamins, Prosthetic Groups, Pigments;NAD and NADP;NAD_and_NADP_cofactor_biosynthesis_global;Niacin transporter NiaP	0.306437	0.516181	0.00654426	0.00526404
Nitrogen Metabolism;Nitrate_and_nitrite_ammonification;Ferredoxin-type protein NapF (periplasmic nitrate reductase)	0.994937	0.999985	0.00127827	0
Virulence;Invasion and intracellular resistance	0.46186	0.670072	0.00324472	0.00197273
Potassium metabolism;Glutathione-regulated_potassium-efflux_system_and_associated_functions;Glutathione-regulated potassium-efflux system protein KefB	0.0614453	0.169415	0.00206744	0.000804846
Virulence;Type III, Type IV, Type VI, ESAT secretion systems;Type_VI_secretion_systems;Protein ImpG/VasA	0.00176085	0.0102845	0.00126095	1.02746e-05
Stress Response;Carbon_Starvation;Carbon starvation protein A paralog	0.026302	0.087955	0.00262723	0.00137908
Motility and Chemotaxis;Flagellar motility in Prokaryota;Flagellum;Flagellar assembly protein FliH	0.727239	0.938051	0.00197944	0.00073749
Clustering-based subsystems;Putative_hemin_transporter	0.324001	0.536148	0.0020963	0.000860786
Carbohydrates;Aminosugars;Chitin_and_N-acetylglucosamine_utilization;N-acetylglucosamine-regulated TonB-dependent outer membrane receptor	0.465318	0.674834	0.0352476	0.0340136
Nucleosides and Nucleotides;Pyrimidines;pyrimidine_conversions;Cytosine deaminase (EC 3.5.4.1)	0.0988303	0.238494	0.0018871	0.000657576
Clustering-based subsystems;Clustering-based subsystems;Sporulation-related_Hypotheticals;Stage II sporulation protein D	0.0235951	0.0810149	0.0227477	0.0215185
Stress Response;Oxidative stress;Oxidative_stress;Organic hydroperoxide resistance transcriptional regulator	0.310689	0.522431	0.0127928	0.0115772
RNA Metabolism;RNA processing and modification;tRNA_modification_Bacteria;Queuosine biosynthesis QueD, PTPS-I	0.00258838	0.0142324	0.00312353	0.00190994
Cofactors, Vitamins, Prosthetic Groups, Pigments;Folate and pterines;Methanopterin_biosynthesis2	0.594727	0.807444	0.0061605	0.00495009
Carbohydrates;Central carbohydrate metabolism;Pyruvate_Alanine_Serine_Interconversions;D-serine/D-alanine/glycine transporter	0.789089	0.997777	0.00683714	0.00562936
Cofactors, Vitamins, Prosthetic Groups, Pigments;Folate and pterines;Pterin_biosynthesis;Dihydropteridine reductase (EC 1.5.1.34)	0.204124	0.398565	0.00371072	0.00250701
Nucleosides and Nucleotides;Pyrimidines;pyrimidine_conversions;Nucleoside diphosphate kinase (EC 2.7.4.6)	0.286568	0.495508	0.00364436	0.0024408
Virulence;Iron Scavenging Mechanisms;Iron(III)_dicitrate_transport_system_Fec	0.185685	0.373017	0.00148746	0.000285406
Respiration;Electron donating reactions;Formate_dehydrogenase;Formate dehydrogenase H (EC 1.2.1.2)	0.000368365	0.00280205	0.00128981	9.01884e-05
Carbohydrates;Sugar alcohols;Ethanolamine_utilization;Ethanolamine permease	0.572897	0.784726	0.00185392	0.000655293
Amino Acids and Derivatives;Lysine, threonine, methionine, and cysteine;Threonine_degradation	0.284136	0.492997	0.016769	0.0155706
Amino Acids and Derivatives;Lysine, threonine, methionine, and cysteine;Threonine_degradation;Threonine dehydrogenase and related Zn-dependent dehydrogenases	0.284136	0.492997	0.016769	0.0155706
Clustering-based subsystems;Clustering-based subsystems;Putative_diaminopropionate_ammonia-lyase_cluster	0.937467	0.999985	0.00148169	0.000284265
Cell Wall and Capsule;Gram-Negative cell wall components;KDO2-Lipid_A_biosynthesis;regulator of length of O-antigen component of lipopolysaccharide chains	0.993177	0.999985	0.00119603	0
Protein Metabolism;Protein folding;Protein_chaperones;HspR, transcriptional repressor of DnaK operon	0.532688	0.743138	0.00431812	0.0031292
Respiration;Electron donating reactions;Respiratory_dehydrogenases_1;Anaerobic glycerol-3-phosphate dehydrogenase subunit A (EC 1.1.5.3)	0.00168388	0.00992536	0.00137493	0.000186085
Nitrogen Metabolism;Nitrate_and_nitrite_ammonification;Periplasmic nitrate reductase precursor (EC 1.7.99.4)	0.0690214	0.183596	0.00216122	0.000973807
Cell Wall and Capsule;UDP-N-acetylmuramate_from_Fructose-6-phosphate_Biosynthesis;N-acetylmuramic acid 6-phosphate etherase (EC 4.2.-.-)	0.783573	0.99275	0.00921045	0.00802334
Cofactors, Vitamins, Prosthetic Groups, Pigments;Quinone cofactors;Menaquinone_Biosynthesis_via_Futalosine_--_gjo;Ubiquinone/menaquinone biosynthesis methyltransferase UbiE (EC 2.1.1.-)	0.852449	0.999985	0.0114351	0.0102495
Clustering-based subsystems;Choline bitartrate degradation, putative;CBSS-344610.3.peg.2335;Positive regulator of Tartrate dehydrogenase/decarboxylase/D-malic enzyme	0.238883	0.442686	0.00150478	0.000320797
Cell Wall and Capsule;Capsular and extracellular polysacchrides;dTDP-rhamnose_synthesis	0.55907	0.77266	0.0182766	0.017097
Cell Wall and Capsule;Gram-Negative cell wall components;Major_Outer_Membrane_Proteins	0.993505	0.999985	0.00117872	0
Virulence;Type III, Type IV, Type VI, ESAT secretion systems;Type_4_conjugative_transfer_system,_IncI1_type;IncI1 plasmid conjugative transfer pilus-tip adhesin protein PilV	0.298723	0.506919	0.0012018	3.19655e-05
Protein Metabolism;Protein biosynthesis;Nucleolar_protein_complex;Succinyl-CoA:3-ketoacid-coenzyme A transferase subunit A (EC 2.8.3.5)	0.956951	0.999985	0.00390405	0.00273533
Stress Response;Detoxification;Glutathione-dependent_pathway_of_formaldehyde_detoxification	0.0611923	0.169081	0.00145861	0.000296823
Virulence;Resistance to antibiotics and toxic compounds;USS-DB-1;Sugar ABC transporter, sugar permease protein 2 USSDB1D	0.399944	0.612082	0.00524436	0.00408702
DNA Metabolism;DNA repair;Uracil-DNA_glycosylase	7.48033e-05	0.000723412	0.030185	0.0290281
Virulence;Ton_and_Tol_transport_systems;Biopolymer transport protein ExbD/TolR	0.469731	0.677913	0.0221706	0.0210185
Carbohydrates;Monosaccharides;D-Galacturonate_and_D-Glucuronate_Utilization;Rhamnogalacturonides degradation protein RhiN	0.162285	0.337277	0.104069	0.102922
DNA Metabolism;DNA repair;DNA_repair,_bacterial_UvrD_and_related_helicases	0.221098	0.421082	0.00396176	0.00281867
Clustering-based subsystems;Conjugative_transfer_related_cluster;IncF plasmid conjugative transfer protein TraG	0.00837088	0.0365715	0.00115996	2.16909e-05
Protein Metabolism;Protein biosynthesis;Universal_GTPases;Probable GTPase related to EngC	0.492408	0.702996	0.00515779	0.00401966
Amino Acids and Derivatives;Arginine; urea cycle, polyamines;Arginine_Deiminase_Pathway;Carbamate kinase (EC 2.7.2.2)	0.43219	0.640053	0.00654859	0.0054113
Cell Wall and Capsule;Capsular and extracellular polysacchrides;Sialic_Acid_Metabolism;PTS system, N-acetylglucosamine-specific IIA component (EC 2.7.1.69)	0.490617	0.700782	0.00809088	0.00695478
Virulence;Invasion and intracellular resistance;pVir_Plasmid_of_Campylobacter	0.985471	0.999985	0.00310622	0.00197273
Virulence;Invasion and intracellular resistance;pVir_Plasmid_of_Campylobacter;Type IV secretion system protein VirD4	0.985471	0.999985	0.00310622	0.00197273
Carbohydrates;Monosaccharides;Mannose_Metabolism;D-mannose isomerase (EC 5.3.1.7)	0.396613	0.609375	0.0209702	0.019838
Phages, Prophages, Transposable elements;Phage_packaging_machinery;Phage terminase, small subunit	0.143956	0.311432	0.00169666	0.000569671
Amino Acids and Derivatives;Lysine, threonine, methionine, and cysteine;Cysteine_Biosynthesis;Adenylylsulfate kinase (EC 2.7.1.25)	0.972587	0.999985	0.00562812	0.00451056
Stress Response;Hfl_operon	0.430268	0.638461	0.00569738	0.0045802
Protein Metabolism;Protein biosynthesis;Nucleolar_protein_complex	0.9447	0.999985	0.00395888	0.00284721
Cell Wall and Capsule;Capsular and extracellular polysacchrides;Rhamnose_containing_glycans;dTDP-4-dehydrorhamnose reductase (EC 1.1.1.133)	0.157334	0.330917	0.026985	0.0258772
Virulence;Type III, Type IV, Type VI, ESAT secretion systems;Type_III_secretion_system;Type III secretion cytoplasmic ATP synthase (EC 3.6.3.14, YscN,SpaL,MxiB,HrcN,EscN)	0.863183	0.999985	0.0014413	0.000340204
Carbohydrates;Di- and oligosaccharides;Lactose_and_Galactose_Uptake_and_Utilization;Galactose/methyl galactoside ABC transport system, ATP-binding protein MglA (EC 3.6.3.17)	0.383566	0.596022	0.00719782	0.00609742
Miscellaneous;ZZ_gjo_need_homes;Quinone oxidoreductase (EC 1.6.5.5)	0.182226	0.368376	0.00179332	0.000692967
Cell Wall and Capsule;Capsular and extracellular polysacchrides;Alginate_metabolism;Hexuronate transporter	0.390947	0.60351	0.0285374	0.0274378
Carbohydrates;Aminosugars;N-Acetyl-Galactosamine_and_Galactosamine_Utilization;Tagatose-1,6-bisphosphate aldolase AgaY (EC 4.1.2.-)	0.77084	0.981139	0.00171686	0.000621044
Carbohydrates;Sugar alcohols;Propanediol_utilization;Propanediol dehydratase large subunit (EC 4.2.1.28)	0.719728	0.930738	0.00139369	0.000299106
Clustering-based subsystems;CBSS-312309.3.peg.1965	0.00478535	0.0230235	0.0568713	0.0557821
Amino Acids and Derivatives;Alanine, serine, and glycine;Glycine_cleavage_system;Sodium/glycine symporter GlyP	0.108403	0.254644	0.0297897	0.0287005
Carbohydrates;Organic acids;Glycerate_metabolism;Serine--glyoxylate aminotransferase (EC 2.6.1.45)	0.279924	0.490632	0.00188566	0.000800279
Clustering-based subsystems;CBSS-314269.3.peg.1840;carbon monoxide dehydrogenase D protein	0.979335	0.999985	0.00240649	0.00132429
Protein Metabolism;Protein biosynthesis;Translation_initiation_factors_eukaryotic_and_archaeal;Translation initiation factor SUI1-related protein	0.28786	0.495959	0.00282633	0.0017444
Metabolism of Aromatic Compounds;Aromatic_Amin_Catabolism;4-hydroxyphenylacetate 3-monooxygenase, reductase component (EC 1.6.8.-)	0.875064	0.999985	0.00610423	0.00502315
Carbohydrates;Organic acids;Lactate_utilization	0.210067	0.406102	0.00117006	8.90468e-05
Carbohydrates;Organic acids;Lactate_utilization;L-lactate permease	0.210067	0.406102	0.00117006	8.90468e-05
Amino Acids and Derivatives;Glutamine, glutamate, aspartate, asparagine; ammonia assimilation;Glutamate_and_Aspartate_uptake_in_Bacteria;Glutamate Aspartate transport system permease protein GltJ (TC 3.A.1.3.4)	0.0940379	0.229229	0.00178467	0.000704383
Regulation and Cell signaling;Orphan_regulatory_proteins;Transcriptional regulatory protein CitB, DpiA	0.821356	0.999985	0.00604796	0.00496835
Carbohydrates;Organic acids;Glycerate_metabolism;Hydroxypyruvate reductase (EC 1.1.1.81)	0.60712	0.819069	0.0121219	0.0110429
Carbohydrates;Organic acids;Isobutyryl-CoA_to_Propionyl-CoA_Module;3-hydroxyisobutyrate dehydrogenase (EC 1.1.1.31)	0.000967373	0.00632237	0.00110802	3.6532e-05
Virulence;Iron Scavenging Mechanisms;Transport_of_Iron;Putative high-affinity iron permease	0.0699629	0.184881	0.00131001	0.0002386
Carbohydrates;Organic acids;Isobutyryl-CoA_to_Propionyl-CoA_Module	0.0029343	0.0155352	0.00111812	4.68066e-05
Clustering-based subsystems;Hypothetical in Lysine biosynthetic cluster;CBSS-323850.3.peg.3269;2-haloalkanoic acid dehalogenase (EC 3.8.1.2)	0.621231	0.831693	0.00875165	0.007682
Clustering-based subsystems;Shiga toxin cluster;CBSS-194948.1.peg.143;Protein NinG	0.262513	0.471715	0.00156249	0.000493182
Stress Response;Acid stress;Acid_resistance_mechanisms;Arginine decarboxylase, catabolic (EC 4.1.1.19)	0.992758	0.999985	0.00106907	0
Membrane Transport;SecY2-SecA2 specialized system;SecY2-SecA2_Specialized_Transport_System;Preprotein translocase SecY2 subunit (TC 3.A.5.1.1)	0.348721	0.560662	0.00162885	0.000560538
Clustering-based subsystems;CBSS-316273.3.peg.227	0.124053	0.279227	0.00107773	1.14163e-05
Plant-Prokaryote DOE project;At5g37530;Histidyl-tRNA synthetase (EC 6.1.1.21)	0.655982	0.864684	0.019754	0.0186896
Amino Acids and Derivatives;Histidine Metabolism;Histidine_Degradation;Histidine transport protein (permease)	0.077306	0.198141	0.00138214	0.000321938
Carbohydrates;Monosaccharides;Xylose_utilization	0.77453	0.984859	0.00284075	0.00178436
Cell Wall and Capsule;Gram-Negative cell wall components;LOS_core_oligosaccharide_biosynthesis;O-antigen ligase	0.309791	0.521148	0.00180198	0.000748906
RNA Metabolism;RNA processing and modification;tRNA_modification_Archaea;PUA-PAPS reductase like fusion	0.833834	0.999985	0.00587628	0.00483593
Virulence;Resistance to antibiotics and toxic compounds;Methicillin_resistance_in_Staphylococci;Beta-lactamase regulatory sensor-transducer BlaR1	0.288394	0.496657	0.00601766	0.00498091
Clustering-based subsystems;Chromosome Replication	4.64337e-05	0.000475328	0.00106618	2.96823e-05
Clustering-based subsystems;Chromosome Replication;SeqA_and_Co-occurring_Genes	4.64337e-05	0.000475328	0.00106618	2.96823e-05
Clustering-based subsystems;Chromosome Replication;SeqA_and_Co-occurring_Genes;Phosphoglucomutase (EC 5.4.2.2)	4.64337e-05	0.000475328	0.00106618	2.96823e-05
Cofactors, Vitamins, Prosthetic Groups, Pigments;NAD and NADP;NAD_and_NADP_cofactor_biosynthesis_global;Nicotinate phosphoribosyltransferase (EC 2.4.2.11)	0.136515	0.298889	0.0189417	0.0179053
Clustering-based subsystems;Lysine, threonine, methionine, and cysteine	0.15084	0.321652	0.0010835	4.79483e-05
Clustering-based subsystems;Lysine, threonine, methionine, and cysteine;YeiH	0.15084	0.321652	0.0010835	4.79483e-05
Clustering-based subsystems;Lysine, threonine, methionine, and cysteine;YeiH;Lysine-specific permease	0.15084	0.321652	0.0010835	4.79483e-05
Cofactors, Vitamins, Prosthetic Groups, Pigments;Riboflavin, FMN, FAD;Flavodoxin	0.497188	0.707198	0.00882812	0.00779844
Fatty Acids, Lipids, and Isoprenoids;Polyhydroxybutyrate_metabolism;Acetyl-CoA acetyltransferase (EC 2.3.1.9)	0.136569	0.298889	0.00156249	0.000537706
Miscellaneous;Muconate_lactonizing_enzyme_family	0.0466736	0.138403	0.0164068	0.0153823
Cell Wall and Capsule;Peptidoglycan_Biosynthesis;Membrane-bound lytic murein transglycosylase B precursor (EC 3.2.1.-)	0.0379264	0.117127	0.00166636	0.000642735
Phosphorus Metabolism;Phosphate_metabolism;NAD(P) transhydrogenase subunit beta (EC 1.6.1.2)	0	0	0.00104166	2.7399e-05
Stress Response;Osmotic stress;Choline_and_Betaine_Uptake_and_Betaine_Biosynthesis;Betaine aldehyde dehydrogenase (EC 1.2.1.8)	0.035596	0.111571	0.00133021	0.000318514
Carbohydrates;Fermentation;Acetone_Butanol_Ethanol_Synthesis;NADH-dependent butanol dehydrogenase A (EC 1.1.1.-)	0.285742	0.494738	0.0165699	0.0155615
Phages, Prophages, Transposable elements;Bacteriophage structural proteins;Phage_tail_proteins_2;Phage tail assembly protein	0.993122	0.999985	0.00100703	0
RNA Metabolism;RNA processing and modification;rRNA_modification_Bacteria;Ribosomal RNA small subunit methyltransferase C (EC 2.1.1.52)	0.0487219	0.143662	0.00110514	0.000101605
Carbohydrates;Di- and oligosaccharides;Lactose_and_Galactose_Uptake_and_Utilization;Lactose permease	0.0345519	0.109008	0.00101713	1.36995e-05
Phosphorus Metabolism;Phosphate_metabolism;Phosphate-specific outer membrane porin OprP	0.359199	0.572962	0.0253504	0.0243474
Virulence;Iron Scavenging Mechanisms;Campylobacter_Iron_Metabolism;Magnesium and cobalt transport protein CorA	0.125745	0.281554	0.0188047	0.0178059
Stress Response;Commensurate_regulon_activation	0.666767	0.876498	0.00642884	0.00543071
Stress Response;Commensurate_regulon_activation;Multiple antibiotic resistance protein MarA	0.666767	0.876498	0.00642884	0.00543071
RNA Metabolism;Transcription;Transcription_initiation,_bacterial_sigma_factors;RNA polymerase sigma factor RpoE	0.872949	0.999985	0.00149756	0.000501174
Nitrogen Metabolism;Nitrate_and_nitrite_ammonification;Respiratory nitrate reductase beta chain (EC 1.7.99.4)	0.247575	0.454853	0.00116862	0.000173527
Secondary Metabolism;Biosynthesis of phenylpropanoids;Phenylpropionate_Degradation	0.652223	0.860908	0.00118882	0.000194076
Carbohydrates;Sugar alcohols;Ethanolamine_utilization;Acetaldehyde dehydrogenase, ethanolamine utilization cluster	0.107633	0.253073	0.00122921	0.000235175
Protein Metabolism;Protein biosynthesis;Translation_initiation_factors_eukaryotic_and_archaeal	0.311837	0.523284	0.0029302	0.00193734
Motility and Chemotaxis;Flagellar motility in Prokaryota;Flagellum;Flagellar motor switch protein FliN	0.924561	0.999985	0.00478412	0.00379134
Carbohydrates;Aminosugars;N-Acetyl-Galactosamine_and_Galactosamine_Utilization;Beta-galactosidase 3	0.721403	0.932084	0.0015596	0.000569671
Nucleosides and Nucleotides;Pyrimidines;pyrimidine_conversions;Purine nucleoside phosphorylase (EC 2.4.2.1)	0.0534932	0.153768	0.0220119	0.0210242
Clustering-based subsystems;Putrescine/GABA utilization cluster-temporal,to add to SSs;GABA_and_putrescine_metabolism_from_cluters;Putrescine transport system permease protein PotH (TC 3.A.1.11.2)	0.43159	0.639411	0.00695112	0.00596385
Stress Response;Oxidative stress;Protection_from_Reactive_Oxygen_Species;Peroxidase (EC 1.11.1.7)	0.992743	0.999985	0.000981063	0
Membrane Transport;Transport_of_Manganese;Manganese transport protein MntH	0.216937	0.414992	0.0120714	0.011092
Respiration;Electron donating reactions;Respiratory_Complex_I;NADH-ubiquinone oxidoreductase chain N (EC 1.6.5.3)	0.118738	0.271231	0.00247718	0.0015001
DNA Metabolism;DNA repair;Uracil-DNA_glycosylase;G:T/U mismatch-specific uracil/thymine DNA-glycosylase	5.01106e-08	1.12137e-06	0.0171729	0.0162042
Clustering-based subsystems;Cell_wall_related_cluster	0.831056	0.999985	0.00714733	0.00617962
Carbohydrates;Monosaccharides;L-fucose_utilization_temp;Fucose permease	0.0809888	0.205353	0.058894	0.0579284
Motility and Chemotaxis;Flagellar motility in Prokaryota;Flagellum;Flagellar motor switch protein FliM	0.421174	0.629308	0.00316104	0.00219763
Carbohydrates;Central carbohydrate metabolism;Glyoxylate_bypass;Aconitate hydratase 2 (EC 4.2.1.3)	0.99353	0.999985	0.000955093	0
Stress Response;Periplasmic Stress;Periplasmic_Stress_Response;HtrA protease/chaperone protein	0.401808	0.613713	0.034089	0.0331357
Respiration;Electron donating reactions;Respiratory_dehydrogenases_1;Glucose dehydrogenase, PQQ-dependent (EC 1.1.5.2)	0.0245261	0.0833196	0.00096375	1.36995e-05
Cell Wall and Capsule;Gram-Negative cell wall components;Vibrio_Core_Oligosaccharide_Biosynthesis	0.528364	0.737908	0.0157533	0.0148046
Amino Acids and Derivatives;Arginine; urea cycle, polyamines;Arginine_and_Ornithine_Degradation;Agmatinase (EC 3.5.3.11)	0.708306	0.917626	0.00495437	0.00400596
Nitrogen Metabolism;Allantoin_Utilization;2-hydroxy-3-oxopropionate reductase (EC 1.1.1.60)	0.882085	0.999985	0.00394733	0.00300019
Carbohydrates;Fermentation;Fermentations:_Mixed_acid;Acetaldehyde dehydrogenase (EC 1.2.1.10)	0.139679	0.304602	0.0146727	0.0137292
Carbohydrates;Di- and oligosaccharides;Beta-Glucoside_Metabolism;Glucokinase, ROK family (EC 2.7.1.2)	0.00136291	0.00832674	0.00095365	1.14163e-05
Stress Response;Oxidative stress;Glutathione:_Redox_cycle	0.0308862	0.0997644	0.00094788	7.99138e-06
Stress Response;Oxidative stress;Glutathione:_Redox_cycle;Glutathione reductase (EC 1.8.1.7)	0.0308862	0.0997644	0.00094788	7.99138e-06
Cell Wall and Capsule;Capsular and extracellular polysacchrides;Extracellular_Polysaccharide_Biosynthesis_of_Streptococci;Capsular polysaccharide biosynthesis protein CpsK(V)	0.363139	0.576648	0.00162452	0.000684975
Carbohydrates;Central carbohydrate metabolism;Glyoxylate_bypass;Malate synthase G (EC 2.3.3.9)	0.992692	0.999985	0.000939223	0
Cell Wall and Capsule;Capsular and extracellular polysacchrides;Capsular_Polysaccharide_(CPS)_of_Campylobacter	0.256594	0.464851	0.000968078	3.08239e-05
Cell Wall and Capsule;Gram-Negative cell wall components;Vibrio_Core_Oligosaccharide_Biosynthesis;Polysaccharide deacetylase	0.525664	0.735738	0.0157417	0.0148046
Amino Acids and Derivatives;Aromatic amino acids and derivatives;Aromatic_amino_acid_degradation;Aromatic amino acid transport protein AroP	0.0192888	0.0691952	0.000946437	1.59828e-05
Dormancy and Sporulation;Sporulation_draft;Spore cortex-lytic enzyme precursor	0.629456	0.839492	0.00621388	0.00528687
Motility and Chemotaxis;Flagellar motility in Prokaryota;Flagellum;Flagellar M-ring protein FliF	0.880249	0.999985	0.00443065	0.00350593
Membrane Transport;Transport_of_Zinc;Zinc uptake regulation protein ZUR	0.949989	0.999985	0.00499188	0.00406989
Virulence;Streptococcus_pyogenes_Virulome;C5a peptidase (EC 3.4.21.-)	0.542116	0.753696	0.014514	0.0135922
Stress Response;Oxidative stress;Glutathione_analogs:_mycothiol;N-acetyl-1-D-myo-inosityl-2-amino-2-deoxy-alpha-D-glucopyranoside deacetylase MshB	0.968737	0.999985	0.00123931	0.000319655
Regulation and Cell signaling;cAMP_signaling_in_bacteria;Putative hemin-binding lipoprotein	0.0291598	0.095807	0.00115131	0.000234033
Carbohydrates;Uncharacterized_sugar_kinase_cluster_(ygc);Probable electron transfer flavoprotein-quinone oxidoreductase YgcN (EC 1.5.5.-)	0.278816	0.490284	0.00119315	0.000281981
Clustering-based subsystems;Conjugative_transfer_related_cluster;IncF plasmid conjugative transfer protein TraN	0.031717	0.101647	0.000991162	8.10554e-05
Cell Wall and Capsule;Gram-Negative cell wall components;LOS_core_oligosaccharide_biosynthesis;D-glycero-D-manno-heptose 1,7-bisphosphate phosphatase (EC 3.1.1.-)	0.830002	0.999985	0.00292587	0.00201954
Virulence;Resistance to antibiotics and toxic compounds;Methicillin_resistance_in_Staphylococci;Methicillin resistance repressor MecI	0.285676	0.494738	0.00196934	0.0010697
Carbohydrates;Monosaccharides;D-Galacturonate_and_D-Glucuronate_Utilization;Pectinesterase (EC 3.1.1.11)	0.944861	0.999985	0.0100415	0.0091467
Protein Metabolism;Protein processing and modification;Signal_peptidase;Lipoprotein signal peptidase (EC 3.4.23.36)	0.279658	0.490388	0.0148241	0.0139324
Virulence;Quorum sensing and biofilm formation;Symbiotic_colonization_and_sigma-dependent_biofilm_formation_gene_cluster;Glycosyltransferase (EC 2.4.1.-) SypH	0.999963	0.999985	0.000888727	0
Membrane Transport;Lipoprotein sorting;Lipoprotein_sorting_system;Outer membrane lipoprotein carrier protein LolA	0.332968	0.54536	0.00220306	0.00131515
Nucleosides and Nucleotides;Purines;De_Novo_Purine_Biosynthesis;IMP cyclohydrolase (EC 3.5.4.10)	0.157272	0.330917	0.0355938	0.0347088
Motility and Chemotaxis;Flagellar motility in Prokaryota;Flagellum;Flagellar motor rotation protein MotA	0.5958	0.807826	0.00278737	0.00190994
DNA Metabolism;DNA repair;DNA_repair,_bacterial;DNA mismatch repair endonuclease MutH	0.000509265	0.00371947	0.000885842	9.133e-06
Motility and Chemotaxis;Flagellar motility in Prokaryota;Flagellum;Flagellar motor switch protein FliG	0.740029	0.94914	0.00344815	0.00257551
Membrane Transport;Transport_of_Zinc;Zinc ABC transporter, periplasmic-binding protein ZnuA	0.865355	0.999985	0.00996644	0.00909419
Cell Wall and Capsule;UDP-N-acetylmuramate_from_Fructose-6-phosphate_Biosynthesis;UDP-N-acetylenolpyruvoylglucosamine reductase (EC 1.1.1.158)	0.192069	0.383243	0.0448028	0.043932
Cell Wall and Capsule;Gram-Negative cell wall components;KDO2-Lipid_A_biosynthesis;3-deoxy-D-manno-octulosonate 8-phosphate phosphatase (EC 3.1.3.45)	0.838288	0.999985	0.00543336	0.00456764
Amino Acids and Derivatives;Histidine Metabolism;Histidine_Biosynthesis;ATP phosphoribosyltransferase (EC 2.4.2.17)	0.70378	0.912992	0.00840973	0.00755756
Respiration;Formate_hydrogenase;Formate hydrogenlyase subunit 5	0.0848056	0.212071	0.00117295	0.000320797
Nitrogen Metabolism;Nitrate_and_nitrite_ammonification;Nitrate/nitrite transporter	0.237861	0.441217	0.000919025	7.07808e-05
Clustering-based subsystems;Membrane-bound hydrogenase;CBSS-69014.3.peg.2094;NADH-ubiquinone oxidoreductase chain D (EC 1.6.5.3)	0.598884	0.810514	0.0170402	0.016194
Amino Acids and Derivatives;Arginine; urea cycle, polyamines;Arginine_and_Ornithine_Degradation;Arginase (EC 3.5.3.1)	0.348503	0.560662	0.00944273	0.00859986
Metabolism of Aromatic Compounds;Aromatic_Amin_Catabolism;4-hydroxyphenylacetate 3-monooxygenase (EC 1.14.13.3)	0.00256705	0.0141555	0.00132155	0.000481766
Cell Wall and Capsule;Gram-Positive cell wall components;Teichoic_and_lipoteichoic_acids_biosynthesis;N-acetylmannosaminyltransferase (EC 2.4.1.187)	0.829126	0.999985	0.00380883	0.00297051
Respiration;Electron donating reactions;Respiratory_dehydrogenases_1;D-amino acid dehydrogenase small subunit (EC 1.4.99.1)	0.00750933	0.033687	0.00117583	0.000341346
Stress Response;Oxidative stress;Glutathione:_Biosynthesis_and_gamma-glutamyl_cycle;Glutamate--cysteine ligase (EC 6.3.2.2)	0.207836	0.403409	0.00103877	0.000210059
Motility and Chemotaxis;Flagellar motility in Prokaryota;Flagellum;Flagellar biosynthesis protein FliR	0.441963	0.648538	0.002444	0.00161654
Virulence;Resistance to antibiotics and toxic compounds;Arsenic_resistance;Arsenical pump-driving ATPase (EC 3.6.3.16)	0.335678	0.547544	0.0045201	0.00369544
Virulence;Iron Scavenging Mechanisms;Siderophore_assembly_kit;Ferric hydroxamate outer membrane receptor FhuA	0.0848621	0.212071	0.000836789	1.36995e-05
Phosphorus Metabolism;Phosphate_metabolism;Alkaline phosphatase synthesis transcriptional regulatory protein PhoP	0.214445	0.411876	0.0161183	0.0152989
Nitrogen Metabolism;Nitrosative_stress;Functional role page for Anaerobic nitric oxide reductase transcription regulator NorR	0.000889526	0.00587271	0.000996933	0.000178094
Nucleosides and Nucleotides;Purines;De_Novo_Purine_Biosynthesis;Phosphoribosylglycinamide formyltransferase (EC 2.1.2.2)	0.133274	0.293798	0.0101785	0.00936019
Cofactors, Vitamins, Prosthetic Groups, Pigments;NAD and NADP;NAD_and_NADP_cofactor_biosynthesis_global;N-Ribosylnicotinamide phosphorylase (EC 2.4.2.1)	0.404441	0.614119	0.00869539	0.00787722
Cell Wall and Capsule;Capsular and extracellular polysacchrides;Phosphorylcholine_incorporation_in_LPS	0.169863	0.34851	0.0181295	0.0173116
Respiration;Electron accepting reactions;Terminal_cytochrome_oxidases;Cytochrome d ubiquinol oxidase subunit I (EC 1.10.3.-)	0.668186	0.877464	0.016075	0.0152612
Clustering-based subsystems;Membrane-bound hydrogenase	0.571195	0.783847	0.0339159	0.0331049
Clustering-based subsystems;Membrane-bound hydrogenase;CBSS-69014.3.peg.2094	0.571195	0.783847	0.0339159	0.0331049
Carbohydrates;Monosaccharides;Xylose_utilization;D-xylose transport ATP-binding protein XylG	0.0235934	0.0810149	0.000859872	5.02315e-05
Sulfur Metabolism;Organic sulfur assimilation;Taurine_Utilization;Taurine-binding periplasmic protein TauA	0.228216	0.429536	0.00099549	0.000188368
Clustering-based subsystems;Shiga toxin cluster;CBSS-194948.1.peg.143;unknown protein encoded by bacteriophage BP-933W	0.992667	0.999985	0.000806491	0
Carbohydrates;Monosaccharides;D-galactarate,_D-glucarate_and_D-glycerate_catabolism;D-glucarate permease	0.0954082	0.231892	0.000815148	1.14163e-05
Protein Metabolism;Protein biosynthesis;tRNA_aminoacylation,_Gly;Glycyl-tRNA synthetase beta chain (EC 6.1.1.14)	0.164172	0.339365	0.00251614	0.00171244
Virulence;Pathogenicity islands;Staphylococcal_pathogenicity_islands_SaPI;GMP synthase [glutamine-hydrolyzing] (EC 6.3.5.2)	0.00205022	0.011743	0.0492508	0.0484472
Carbohydrates;Fermentation;Fermentations:_Mixed_acid;L-lactate dehydrogenase (EC 1.1.1.27)	0.173232	0.353912	0.00827988	0.0074845
Phosphorus Metabolism;Phosphate_metabolism;NAD(P) transhydrogenase alpha subunit (EC 1.6.1.2)	1.14571e-05	0.000139112	0.000871414	7.76305e-05
DNA Metabolism;DNA replication;DNA_replication,_archaeal	0.807005	0.999985	0.00143408	0.000640452
Amino Acids and Derivatives;Lysine, threonine, methionine, and cysteine;Methionine_Biosynthesis;Cystathionine beta-lyase (EC 4.4.1.8)	0.972086	0.999985	0.00245987	0.00166906
DNA Metabolism;DNA replication;DNA-replication;Exodeoxyribonuclease V beta chain (EC 3.1.11.5)	0.514777	0.725513	0.0274409	0.0266501
Virulence;Resistance to antibiotics and toxic compounds;Methicillin_resistance_in_Staphylococci;tRNA-dependent lipid II--glycine ligase (FmhB)	0.982237	0.999985	0.00250171	0.00171244
Membrane Transport;General transport systems;General_Secretion_Pathway;General secretion pathway protein L	0.992896	0.999985	0.000786293	0
Clustering-based subsystems;CBSS-316273.3.peg.227;Penicillin-insensitive transglycosylase (EC 2.4.2.-) & transpeptidase PBP-1C	0.99319	0.999985	0.000783407	0
Amino Acids and Derivatives;Lysine, threonine, methionine, and cysteine;Threonine_anaerobic_catabolism_gene_cluster;Threonine dehydratase, catabolic (EC 4.3.1.19)	1.597e-12	7.4942e-11	0.000917582	0.00014042
Amino Acids and Derivatives;Aromatic amino acids and derivatives;Aromatic_amino_acid_degradation;2-hydroxyhepta-2,4-diene-1,7-dioate isomerase (EC 5.3.3.-)	0.312858	0.524245	0.00102723	0.000251158
Phosphorus Metabolism;Phosphate_metabolism;Guanosine-5'-triphosphate,3'-diphosphate pyrophosphatase (EC 3.6.1.40)	0.992636	0.999985	0.000774751	0
Amino Acids and Derivatives;Arginine; urea cycle, polyamines;Arginine_and_Ornithine_Degradation;N-carbamoylputrescine amidase (3.5.1.53)	0.348245	0.5606	0.00936049	0.00858731
Membrane Transport;General transport systems;General_Secretion_Pathway;General secretion pathway protein F	0.564663	0.778713	0.000907483	0.000136995
Carbohydrates;Central carbohydrate metabolism;Dihydroxyacetone_kinases	0.445114	0.652179	0.00563101	0.00486104
Carbohydrates;Central carbohydrate metabolism;Dihydroxyacetone_kinases;Dihydroxyacetone kinase, ATP-dependent (EC 2.7.1.29)	0.445114	0.652179	0.00563101	0.00486104
Nucleosides and Nucleotides;Ribonucleotide_reduction;Ribonucleotide reductase of class Ia (aerobic), beta subunit (EC 1.17.4.1)	0.99348	0.999985	0.00076898	0
Virulence;Resistance to antibiotics and toxic compounds;Arsenic_resistance	0.202738	0.39674	0.00893344	0.00816605
Secondary Metabolism;Biosynthesis of phenylpropanoids;Phenylpropionate_Degradation;3-phenylpropionate dioxygenase ferredoxin--NAD(+) reductase component (EC 1.18.1.3)	0.786703	0.996059	0.000959421	0.000194076
Stress Response;Oxidative stress;Oxidative_stress;Paraquat-inducible protein A	0.00353475	0.0179252	0.000780522	1.59828e-05
Clustering-based subsystems;Cluster_with_phosphopentomutase_paralog;Phosphopentomutase like (EC 5.4.2.7)	0.0148962	0.0569368	0.000829575	6.50727e-05
Virulence;Resistance to antibiotics and toxic compounds;Methicillin_resistance_in_Staphylococci;Penicillin-binding protein 1A/1B (PBP1)	0.907985	0.999985	0.000908926	0.000148411
Plant-Prokaryote DOE project;COG2363;Thiaminase II (EC 3.5.99.2)	0.247886	0.455207	0.00221316	0.00145329
Carbohydrates;Monosaccharides;D-gluconate_and_ketogluconates_metabolism;Low-affinity gluconate/H+ symporter GntU	0.685327	0.895088	0.00333273	0.00257437
Respiration;Electron donating reactions;Respiratory_Complex_I;NADH-ubiquinone oxidoreductase chain E (EC 1.6.5.3)	0.674734	0.883952	0.0040339	0.00328446
Motility and Chemotaxis;Flagellar motility in Prokaryota;Flagellum;Flagellar basal-body rod protein FlgG	0.749509	0.958744	0.00785716	0.00710776
Carbohydrates;Central carbohydrate metabolism;Pyruvate_metabolism_II:_acetyl-CoA,_acetogenesis_from_pyruvate;Acetate permease ActP (cation/acetate symporter)	0.993294	0.999985	0.000748782	0
Protein Metabolism;Protein degradation;Proteasome_bacterial;ATP-dependent hsl protease ATP-binding subunit HslU	0.0349603	0.110026	0.000910368	0.000167819
DNA Metabolism;DNA repair;DNA_Repair_Base_Excision;ATP-dependent DNA ligase (EC 6.5.1.1) clustered with Ku protein, LigD	0.33764	0.549965	0.00119747	0.000460075
Cofactors, Vitamins, Prosthetic Groups, Pigments;Riboflavin, FMN, FAD;Flavodoxin;NAD(P)H oxidoreductase YRKL (EC 1.6.99.-)	0.446853	0.654341	0.00427772	0.00354246
Plant-Prokaryote DOE project;Synechocystis_experimental	0.967586	0.999985	0.00359675	0.00286206
Carbohydrates;Sugar alcohols;Glycerol_and_Glycerol-3-phosphate_Uptake_and_Utilization;SN-glycerol-3-phosphate transport system permease protein UgpA (TC 3.A.1.1.3)	4.63271e-06	6.213e-05	0.000776194	4.22401e-05
Respiration;Electron accepting reactions;Anaerobic_respiratory_reductases;Anaerobic dimethyl sulfoxide reductase chain B (EC 1.8.99.-)	0.0186649	0.0677749	0.00109937	0.000374453
RNA Metabolism;RNA processing and modification;tRNA_modification_Bacteria;tRNA (Uracil54-C5-)-methyltransferase (EC 2.1.1.35)	0.992608	0.999985	0.000721369	0
Carbohydrates;Central carbohydrate metabolism;Glyoxylate_bypass;Malate synthase (EC 2.3.3.9)	0.000849873	0.00563993	0.000724255	6.84975e-06
Regulation and Cell signaling;Two-component_regulatory_systems_in_Campylobacter;Positive regulator of CheA protein activity (CheW)	0.561878	0.775707	0.00194914	0.00123181
Plant-Prokaryote DOE project;At4g38090;Ferrochelatase, protoheme ferro-lyase (EC 4.99.1.1)	0.0541778	0.154926	0.000985391	0.000269424
Cell Wall and Capsule;Capsular and extracellular polysacchrides;Capsular_heptose_biosynthesis	0.584297	0.796374	0.00364869	0.00293284
Respiration;Electron accepting reactions;Terminal_cytochrome_oxidases;Cytochrome O ubiquinol oxidase subunit I (EC 1.10.3.-)	0.993728	0.999985	0.000712713	0
Cell Wall and Capsule;Murein_Hydrolases;Membrane-bound lytic murein transglycosylase C precursor (EC 3.2.1.-)	0.00127391	0.00784996	0.000721369	1.14163e-05
Protein Metabolism;Protein biosynthesis;Ribosome_biogenesis_bacterial;Ribosomal-protein-L7p-serine acetyltransferase	0.702045	0.912192	0.0124306	0.0117211
Virulence;Resistance to antibiotics and toxic compounds;Copper_homeostasis	0.516347	0.726516	0.00753398	0.00682806
DNA Metabolism;DNA repair;DNA_repair,_bacterial_DinG_and_relatives;ATP-dependent helicase DinG/Rad3	5.36081e-06	7.11509e-05	0.000717041	1.59828e-05
Phages, Prophages, Transposable elements;Bacteriophage structural proteins;Phage_tail_proteins_2;Phage tail assembly protein I	0.9942	0.999985	0.000699728	0
Stress Response;Oxidative stress;Glutaredoxins;Flavohemoprotein (Hemoglobin-like protein) (Flavohemoglobin) (Nitric oxide dioxygenase) (EC 1.14.12.17)	0.0851412	0.212384	0.00104599	0.000347054
Carbohydrates;Sugar alcohols;Inositol_catabolism;Glyceraldehyde-3-phosphate ketol-isomerase (EC 5.3.1.1)	0.685128	0.895088	0.00114121	0.000442951
DNA Metabolism;DNA repair;DNA_repair,_bacterial_UvrD_and_related_helicases;ATP-dependent DNA helicase UvrD/PcrA, actinomycete paralog	0.0205739	0.0726504	0.000846888	0.000149553
Virulence;Resistance to antibiotics and toxic compounds;Multidrug_Resistance_Efflux_Pumps;RND efflux system, outer membrane lipoprotein, NodT family	0.0188615	0.068424	0.000724255	2.7399e-05
Regulation and Cell signaling;Orphan_regulatory_proteins;Sensor protein basS/pmrB (EC 2.7.3.-)	0.196096	0.389056	0.00172407	0.00102746
Motility and Chemotaxis;Flagellar motility in Prokaryota;Flagellum;Flagellar basal-body rod modification protein FlgD	0.9059	0.999985	0.00305284	0.00235632
Amino Acids and Derivatives;Aromatic amino acids and derivatives;Aromatic_amino_acid_degradation;2,4-dihydroxyhept-2-ene-1,7-dioic acid aldolase (EC 4.1.2.-)	0.235481	0.439131	0.00128981	0.000602778
Respiration;Reverse electron transport;Archaeal_membrane_bound_hydrogenases;Energy conserving hydrogenase Eha polyferredoxin (protein P3)	0.311997	0.523284	0.00114698	0.000460075
Clustering-based subsystems;CBSS-83332.1.peg.3803;Probable acyl-CoA dehydrogenase fadE35 (EC 1.3.99.-)	0.992766	0.999985	0.000686744	0
Amino Acids and Derivatives;Histidine Metabolism;Histidine_Biosynthesis;Histidinol-phosphatase (EC 3.1.3.15)	0.610298	0.821349	0.0105594	0.00987734
Metabolism of Aromatic Compounds;Metabolism of central aromatic intermediates;4-Hydroxyphenylacetic_acid_catabolic_pathway	0.992339	0.999985	0.000680973	0
Metabolism of Aromatic Compounds;Metabolism of central aromatic intermediates;4-Hydroxyphenylacetic_acid_catabolic_pathway;4-hydroxyphenylacetate symporter, major facilitator superfamily (MFS)	0.992339	0.999985	0.000680973	0
Nucleosides and Nucleotides;Ribonucleotide_reduction;Ribonucleotide reductase of class Ib (aerobic), beta subunit (EC 1.17.4.1)	0.0103093	0.0430374	0.000693957	1.59828e-05
Carbohydrates;Monosaccharides;L-Arabinose_utilization;L-arabinolactonase (EC 3.1.1.15)	0.393257	0.6057	0.00106186	0.000384728
Membrane Transport;Potassium_homeostasis;Large-conductance mechanosensitive channel	0.893628	0.999985	0.00606383	0.00538733
Carbohydrates;Central carbohydrate metabolism;Dehydrogenase_complexes;Dihydrolipoamide succinyltransferase component (E2) of 2-oxoglutarate dehydrogenase complex (EC 2.3.1.61)	0.0161808	0.0609391	0.00101857	0.000343629
Carbohydrates;Central carbohydrate metabolism;Pyruvate_metabolism_II:_acetyl-CoA,_acetogenesis_from_pyruvate;Protein acetyltransferase	0.654095	0.862786	0.00674336	0.00607116
Clustering-based subsystems;Putative_hemin_transporter;Putative hemine transporter ATP-binding subunit	0.57052	0.783847	0.00136195	0.000690683
Cell Wall and Capsule;Gram-Negative cell wall components;Major_Outer_Membrane_Proteins;Attachment invasion locus protein precursor	0.992873	0.999985	0.000669431	0
Clustering-based subsystems;Bacterial_Cell_Division	0.505943	0.716209	0.0245179	0.0238486
Protein Metabolism;Protein biosynthesis;Ribosome_biogenesis_bacterial;Ribosomal-protein-S5p-alanine acetyltransferase	0.0175152	0.0644514	0.0170128	0.0163435
Respiration;Formate_hydrogenase;Formate hydrogenlyase subunit 3	0.992908	0.999985	0.000665103	0
Dormancy and Sporulation;Sporulation_draft;spore peptidoglycan hydrolase (N-acetylglucosaminidase) (EC 3.2.1.-)	0.321676	0.533217	0.00628169	0.0056168
Carbohydrates;Organic acids;Propionate-CoA_to_Succinate_Module;Propionate--CoA ligase (EC 6.2.1.17)	0.992767	0.999985	0.00066366	0
Fatty Acids, Lipids, and Isoprenoids;Fatty acids;Acyl-CoA_thioesterase_II	0.000282782	0.00225232	0.000696843	3.53904e-05
Fatty Acids, Lipids, and Isoprenoids;Fatty acids;Acyl-CoA_thioesterase_II;Acyl-CoA thioesterase II (EC 3.1.2.-)	0.000282782	0.00225232	0.000696843	3.53904e-05
Carbohydrates;Di- and oligosaccharides;Trehalose_Uptake_and_Utilization	0.311683	0.523284	0.043676	0.0430164
Stress Response;Hfl_operon;HflC protein	0.492998	0.703578	0.00258395	0.00192592
Carbohydrates;Central carbohydrate metabolism;Glycolate,_glyoxylate_interconversions;Glycolate dehydrogenase (EC 1.1.99.14), iron-sulfur subunit GlcF	0.906301	0.999985	0.00392569	0.00326847
Clustering-based subsystems;CBSS-314269.3.peg.1840;carbon monoxide dehydrogenase E protein	0.00292968	0.0155322	0.000719927	6.27894e-05
Cell Wall and Capsule;Capsular and extracellular polysacchrides;Colanic_acid_biosynthesis;Polysaccharide export lipoprotein Wza	0.940991	0.999985	0.00879782	0.00814093
Cell Division and Cell Cycle;Cell cycle in Prokaryota;MukBEF_Chromosome_Condensation;Chromosome partition protein MukF	0.993735	0.999985	0.000655003	0
Regulation and Cell signaling;Orphan_regulatory_proteins;Sensory histidine kinase QseC	0.212232	0.409053	0.000975292	0.000321938
Fatty Acids, Lipids, and Isoprenoids;Phospholipids;Glycerolipid_and_Glycerophospholipid_Metabolism_in_Bacteria;Phosphatidylserine decarboxylase (EC 4.1.1.65)	0.476661	0.684578	0.00955382	0.00890125
Amino Acids and Derivatives;Aromatic amino acids and derivatives;Common_Pathway_For_Synthesis_of_Aromatic_Compounds_(DAHP_synthase_to_chorismate);2-keto-3-deoxy-D-arabino-heptulosonate-7-phosphate synthase I alpha (EC 2.5.1.54)	0.180521	0.36589	0.00770134	0.00705296
Nitrogen Metabolism;Nitrate_and_nitrite_ammonification;NrfC protein	0.037844	0.116997	0.000793506	0.000146128
Membrane Transport;General transport systems;General_Secretion_Pathway;General secretion pathway protein K	0.1048	0.248079	0.000657889	1.14163e-05
Respiration;Electron donating reactions;Hydrogenases;[Ni/Fe] hydrogenase, group 1, large subunit	0.993115	0.999985	0.000646347	0
Cofactors, Vitamins, Prosthetic Groups, Pigments;Quinone cofactors;Menaquinone_Biosynthesis_via_Futalosine_--_gjo;4-hydroxybenzoate polyprenyltransferase (EC 2.5.1.-)	0.261422	0.470412	0.000955093	0.000309381
Cell Wall and Capsule;Capsular and extracellular polysacchrides;Capsular_heptose_biosynthesis;D-glycero-D-manno-heptose 1-phosphate guanosyltransferase	0.562385	0.776128	0.00357799	0.00293284
Cofactors, Vitamins, Prosthetic Groups, Pigments;NAD and NADP;NAD_and_NADP_cofactor_biosynthesis_global;Kynurenine formamidase (EC 3.5.1.9)	0.27242	0.483201	0.00129847	0.000654151
Plant-Prokaryote DOE project;At4g38090;Xaa-Pro dipeptidase PepQ (EC 3.4.13.9)	0.992345	0.999985	0.000643462	0
Stress Response;Sugar-phosphate_stress_regulation	0.992788	0.999985	0.000643462	0
Stress Response;Sugar-phosphate_stress_regulation;SgrR, sugar-phosphate stress, transcriptional activator of SgrS small RNA	0.992788	0.999985	0.000643462	0
Sulfur Metabolism;Organic sulfur assimilation;Alkanesulfonates_Utilization;Alkanesulfonate monooxygenase (EC 1.14.14.5)	0.993225	0.999985	0.000636248	0
Motility and Chemotaxis;Flagellar motility in Prokaryota;Flagellum;Flagellar hook-associated protein FlgK	0.530554	0.740429	0.012194	0.0115681
Clustering-based subsystems;CBSS-314269.3.peg.1840;carbon monoxide dehydrogenase operon C protein	0.0431855	0.130063	0.00128548	0.000661001
Amino Acids and Derivatives;Lysine, threonine, methionine, and cysteine;Threonine_and_Homoserine_Biosynthesis	0.641348	0.851956	0.0146149	0.0139906
Amino Acids and Derivatives;Lysine, threonine, methionine, and cysteine;Threonine_and_Homoserine_Biosynthesis;Threonine synthase (EC 4.2.3.1)	0.641348	0.851956	0.0146149	0.0139906
Respiration;Biogenesis_of_cytochrome_c_oxidases	0.0101695	0.0426855	0.000812262	0.00018951
Virulence;Iron Scavenging Mechanisms;Paerucumarin_Biosynthesis	0.161647	0.336631	0.00100992	0.000391578
Virulence;Iron Scavenging Mechanisms;Paerucumarin_Biosynthesis;HTH-type transcriptional regulator PtxR	0.161647	0.336631	0.00100992	0.000391578
Protein Metabolism;Protein biosynthesis;Ribosome_activity_modulation;Ribosome hibernation protein YhbH	0.585912	0.797967	0.00263588	0.00202068
Carbohydrates;Sugar alcohols;Glycerol_and_Glycerol-3-phosphate_Uptake_and_Utilization;SN-glycerol-3-phosphate transport system permease protein UgpE (TC 3.A.1.1.3)	0	0	0.000771865	0.000157544
Cell Wall and Capsule;Capsular and extracellular polysacchrides;Sialic_Acid_Metabolism;Sialic acid biosynthesis protein NeuD, O-acetyltransferase	0.0133336	0.0525294	0.000835346	0.000221475
Carbohydrates;Sugar alcohols;Glycerol_and_Glycerol-3-phosphate_Uptake_and_Utilization;SN-glycerol-3-phosphate transport ATP-binding protein UgpC (TC 3.A.1.1.3)	0.992294	0.999985	0.000613164	0
Amino Acids and Derivatives;Histidine Metabolism;Histidine_Biosynthesis;Histidinol-phosphate aminotransferase (EC 2.6.1.9)	0.404848	0.614143	0.0238874	0.0232743
Virulence;Type III, Type IV, Type VI, ESAT secretion systems;Type_VI_secretion_systems;Protein phosphatase ImpM	0.982517	0.999985	0.00072714	0.000114163
Metabolism of Aromatic Compounds;Peripheral pathways for catabolism of aromatic compounds;Benzoate_degradation	0.119927	0.27337	0.00184959	0.00123752
Clustering-based subsystems;CBSS-176299.4.peg.1996A	0.147319	0.315742	0.00902578	0.0084172
Clustering-based subsystems;CBSS-176299.4.peg.1996A;Bis(5'-nucleosyl)-tetraphosphatase (asymmetrical) (EC 3.6.1.17)	0.147319	0.315742	0.00902578	0.0084172
Motility and Chemotaxis;Flagellar motility in Prokaryota;Flagellum;Flagellar basal-body rod protein FlgF	0.220903	0.420919	0.0015798	0.000972665
Carbohydrates;Central carbohydrate metabolism;Glycolysis_and_Gluconeogenesis;Fructose-1,6-bisphosphatase, GlpX type (EC 3.1.3.11)	0.889144	0.999985	0.000926238	0.000321938
Amino Acids and Derivatives;Arginine; urea cycle, polyamines;Putrescine_utilization_pathways;Gamma-aminobutyrate:alpha-ketoglutarate aminotransferase (EC 2.6.1.19)	0.13308	0.293538	0.00107773	0.000473775
Fatty Acids, Lipids, and Isoprenoids;Fatty acids;Fatty_Acid_Biosynthesis_FASII;4'-phosphopantetheinyl transferase (EC 2.7.8.-)	0.0221484	0.077079	0.000731469	0.000127862
Stress Response;Detoxification;Glutathione-dependent_pathway_of_formaldehyde_detoxification;S-(hydroxymethyl)glutathione dehydrogenase (EC 1.1.1.284)	0.102352	0.243933	0.000676645	7.3064e-05
Metabolism of Aromatic Compounds;Peripheral pathways for catabolism of aromatic compounds;Benzoate_degradation;Benzoate transport protein	0.998629	0.999985	0.000601622	0
Carbohydrates;Central carbohydrate metabolism;Glyoxylate_bypass;Isocitrate lyase (EC 4.1.3.1)	0.992386	0.999985	0.000598737	0
Membrane Transport;ABC transporters;ABC_transporter_dipeptide_(TC_3.A.1.5.2);Dipeptide transport ATP-binding protein DppF (TC 3.A.1.5.2)	0.00652545	0.0299455	0.000600179	3.42488e-06
Cell Wall and Capsule;Cell wall of Mycobacteria;mycolic_acid_synthesis;Acyl carrier protein	0.270308	0.481897	0.00902145	0.0084252
Sulfur Metabolism;Organic sulfur assimilation;Taurine_Utilization;Taurine transport ATP-binding protein TauB	0.936354	0.999985	0.00351884	0.0029237
DNA Metabolism;DNA replication;DNA-replication;Exodeoxyribonuclease V gamma chain (EC 3.1.11.5)	0.0732761	0.190595	0.00253489	0.00194076
Carbohydrates;Di- and oligosaccharides;Lactose_and_Galactose_Uptake_and_Utilization;Galactose-1-phosphate uridylyltransferase (EC 2.7.7.10)	0.658183	0.867288	0.000717041	0.000124437
Clustering-based subsystems;CBSS-370552.3.peg.1240	0.979242	0.999985	0.000806491	0.000214626
Clustering-based subsystems;CBSS-370552.3.peg.1240;FIG006988: Lipase/Acylhydrolase with GDSL-like motif	0.979242	0.999985	0.000806491	0.000214626
Phages, Prophages, Transposable elements;Bacteriophage structural proteins;Phage_tail_fiber_proteins;Phage tail fiber assembly protein	0.271834	0.482384	0.00230694	0.00171586
RNA Metabolism;Transcription;Transcription_initiation,_bacterial_sigma_factors;RNA polymerase sporulation specific sigma factor SigF	0.201194	0.395099	0.00813128	0.00754044
Nucleosides and Nucleotides;De_Novo_Pyrimidine_Synthesis;Aspartate carbamoyltransferase regulatory chain (PyrI)	0.176275	0.358605	0.00132443	0.000735207
Clustering-based subsystems;Conjugative_transfer_related_cluster;IncF plasmid conjugative transfer pilus assembly protein TraB	0.0731288	0.190567	0.000633362	4.45234e-05
RNA Metabolism;RNA processing and modification;Polyadenylation_bacterial	0.0767544	0.197215	0.00103156	0.000442951
RNA Metabolism;RNA processing and modification;Polyadenylation_bacterial;Poly(A) polymerase (EC 2.7.7.19)	0.0767544	0.197215	0.00103156	0.000442951
Membrane Transport;ECF_class_transporters;Transmembrane component STY3231 of energizing module of queuosine-regulated ECF transporter	0.502006	0.711945	0.00100992	0.000424685
Amino Acids and Derivatives;Alanine, serine, and glycine;Alanine_biosynthesis;Cysteine desulfurase (EC 2.8.1.7), IscS subfamily	0.0543786	0.155329	0.00104166	0.00045665
Fatty Acids, Lipids, and Isoprenoids;Isoprenoids;Polyprenyl_Diphosphate_Biosynthesis;Geranylgeranyl reductase (EC 1.3.1.83)	0.255496	0.464587	0.000633362	5.02315e-05
Stress Response;Universal_stress_protein_family;Universal stress protein family 4	0.691642	0.901806	0.00354625	0.0029648
Nucleosides and Nucleotides;Purine_Utilization;Cytosine/purine/uracil/thiamine/allantoin permease family protein	0.973285	0.999985	0.004699	0.00411898
Carbohydrates;Organic acids;Propionate-CoA_to_Succinate_Module;PrpF protein involved in 2-methylcitrate cycle	0.240205	0.444494	0.00116429	0.000584512
Carbohydrates;Aminosugars;Chitin_and_N-acetylglucosamine_utilization;N-acetylglucosamine kinase of eukaryotic type (EC 2.7.1.59)	0.40512	0.614143	0.00195635	0.0013768
Regulation and Cell signaling;DNA-binding_regulatory_proteins,_strays;LysR family transcriptional regulator YhjC	0.125713	0.281554	0.00163895	0.00106171
Carbohydrates;Sugar_utilization_in_Thermotogales;Predicted regulator of xylose utilization, ROK family	0.270831	0.482116	0.000854101	0.00028084
Clustering-based subsystems;Ribosomal Protein L28P relates to a set of uncharacterized proteins;A_Gram-positive_cluster_that_relates_ribosomal_protein_L28P_to_a_set_of_uncharacterized_proteins;Thiamin pyrophosphokinase (EC 2.7.6.2)	0.233902	0.436876	0.00907339	0.00850054
Amino Acids and Derivatives;Alanine, serine, and glycine;Alanine_biosynthesis;Alanine racemase, biosynthetic (EC 5.1.1.1)	0.0855826	0.213071	0.000578538	1.02746e-05
Regulation and Cell signaling;Programmed Cell Death and Toxin-antitoxin Systems;Toxin-antitoxin_systems_(other_than_RelBE_and_MazEF);VapC toxin protein	0.0837312	0.210732	0.00096375	0.000396144
Amino Acids and Derivatives;Arginine; urea cycle, polyamines;Urea_carboxylase_and_Allophanate_hydrolase_cluster;Partial urea carboxylase 2 (EC 6.3.4.6)	0.574611	0.786514	0.00103733	0.00047035
Carbohydrates;Sugar alcohols;Mannitol_Utilization;PTS system, mannitol-specific IIA component (EC 2.7.1.69)	0.441772	0.648505	0.00305861	0.00249331
Respiration;Sodium Ion-Coupled Energetics;Na+_translocating_decarboxylases_and_related_biotin-dependent_enzymes;Oxaloacetate decarboxylase beta chain (EC 4.1.1.3)	0.28279	0.49209	0.0152627	0.0146984
Clustering-based subsystems;Conjugative_transfer_related_cluster;IncF plasmid conjugative transfer pilus assembly protein TraH	0.992843	0.999985	0.000562668	0
Amino Acids and Derivatives;Arginine; urea cycle, polyamines;Putrescine_utilization_pathways;Putrescine aminotransferase (EC 2.6.1.82)	0.0451203	0.13494	0.000572767	1.14163e-05
Membrane Transport;General transport systems;General_Secretion_Pathway;General secretion pathway protein C	0.992348	0.999985	0.000559783	0
Carbohydrates;Monosaccharides;Xylose_utilization;Xylose ABC transporter, permease protein XylH	0.994902	0.999985	0.00055834	0
Stress Response;Detoxification;Glutathione-dependent_pathway_of_formaldehyde_detoxification;S-formylglutathione hydrolase (EC 3.1.2.12)	0.0129827	0.0513571	0.000781965	0.000223759
Respiration;Electron donating reactions;Respiratory_Complex_I;NADH-ubiquinone oxidoreductase chain L (EC 1.6.5.3)	0.0482032	0.142609	0.000581424	2.51158e-05
Amino Acids and Derivatives;Aromatic amino acids and derivatives;Phenylalanine_and_Tyrosine_Branches_from_Chorismate;Biosynthetic Aromatic amino acid aminotransferase alpha (EC 2.6.1.57)	0.0901551	0.222013	0.000597294	4.10985e-05
Clustering-based subsystems;Shiga toxin cluster;CBSS-194948.1.peg.143;Phage endolysin	0.993505	0.999985	0.000554012	0
Carbohydrates;Sugar_utilization_in_Thermotogales;Predicted beta-xyloside ABC transporter, ATP-binding component	0.733223	0.943556	0.00117295	0.000619903
Cell Wall and Capsule;Capsular and extracellular polysacchrides;Rhamnose_containing_glycans;Glycerol-3-phosphate cytidylyltransferase (EC 2.7.7.39)	0.334858	0.546965	0.00975869	0.00920721
Respiration;Sodium Ion-Coupled Energetics;Na+_translocating_decarboxylases_and_related_biotin-dependent_enzymes;Oxaloacetate decarboxylase gamma chain (EC 4.1.1.3)	0.399402	0.611537	0.0015899	0.00104116
Nitrogen Metabolism;Allantoin_Utilization;Allantoin permease	0.992394	0.999985	0.000546798	0
Carbohydrates;Monosaccharides;D-gluconate_and_ketogluconates_metabolism;Gluconate utilization system Gnt-I transcriptional repressor	0.700781	0.911157	0.00244111	0.0018951
Stress Response;Oxidative stress;Glutathione:_Non-redox_reactions;Glutathione S-transferase, theta (EC 2.5.1.18)	0.992408	0.999985	0.00054247	0
Clustering-based subsystems;CBSS-562.2.peg.5158_SK3_including	0.995021	0.999985	0.000538142	0
Clustering-based subsystems;CBSS-562.2.peg.5158_SK3_including;DNA recombination-dependent growth factor C	0.995021	0.999985	0.000538142	0
RNA Metabolism;RNA processing and modification;Queuosine-Archaeosine_Biosynthesis;Inosine-uridine preferring nucleoside hydrolase (EC 3.2.2.1)	0.604805	0.817378	0.00551415	0.00497863
Amino Acids and Derivatives;Lysine, threonine, methionine, and cysteine;Threonine_anaerobic_catabolism_gene_cluster;L-threonine transporter, anaerobically inducible	0.00484997	0.0232472	0.000545355	1.02746e-05
DNA Metabolism;DNA replication;DNA_replication,_archaeal;Replication factor C large subunit	0.517047	0.726849	0.000933452	0.000398427
Carbohydrates;Central carbohydrate metabolism;Entner-Doudoroff_Pathway;Phosphogluconate dehydratase (EC 4.2.1.12)	0.992615	0.999985	0.000533813	0
Respiration;Formate_hydrogenase;Formate hydrogenlyase subunit 4	0.108898	0.254801	0.000683858	0.000151836
Fatty Acids, Lipids, and Isoprenoids;Isoprenoids;polyprenyl_synthesis;4-hydroxy-3-methylbut-2-enyl diphosphate reductase (EC 1.17.1.2)	0.642942	0.85309	0.0100559	0.00952458
Virulence;Quorum sensing and biofilm formation;Symbiotic_colonization_and_sigma-dependent_biofilm_formation_gene_cluster	0.29883	0.506919	0.00559638	0.00506653
Nucleosides and Nucleotides;Pyrimidines;pyrimidine_conversions;Thymidine phosphorylase (EC 2.4.2.4)	0.000560421	0.00397981	0.000535256	5.70813e-06
Cell Wall and Capsule;Gram-Negative cell wall components;Outer_membrane;Outer membrane protein F precursor	0.998495	0.999985	0.000529485	0
Phages, Prophages, Transposable elements;Bacteriophage structural proteins;Phage_capsid_proteins	0.998524	0.999985	0.000529485	0
RNA Metabolism;RNA processing and modification;rRNA_modification_Bacteria;23S rRNA (Uracil-5-) -methyltransferase RumA (EC 2.1.1.-)	0.256248	0.464851	0.00123498	0.000705525
Virulence;Iron Scavenging Mechanisms;Siderophore_Yersiniabactin_Biosynthesis;iron aquisition 2,3-dihydroxybenzoate-AMP ligase (EC 2.7.7.58,Irp5)	0.338285	0.550554	0.000577096	4.79483e-05
Regulation and Cell signaling;DNA-binding_regulatory_proteins,_strays;Xanthosine operon regulatory protein XapR, LysR family	0.764466	0.974315	0.00064779	0.000118729
Carbohydrates;Monosaccharides;D-Galacturonate_and_D-Glucuronate_Utilization;Fructuronate transporter GntP	0.992495	0.999985	0.000528042	0
RNA Metabolism;RNA processing and modification;rRNA_modification_Bacteria;23S rRNA (Uracil-5-) -methyltransferase rumB (EC 2.1.1.-)	0.0138968	0.054029	0.000545355	1.8266e-05
Virulence;Iron Scavenging Mechanisms;Siderophore_assembly_kit;ABC-type Fe3+-siderophore transport system, ATPase component	0.188429	0.377151	0.00171542	0.00118843
Protein Metabolism;Selenoproteins;Selenocysteine_metabolism	0.321106	0.532565	0.0297868	0.029261
Protein Metabolism;Selenoproteins;Selenocysteine_metabolism;selenocysteine-containing	0.321106	0.532565	0.0297868	0.029261
Membrane Transport;ABC transporters;ABC_transporter_dipeptide_(TC_3.A.1.5.2);Dipeptide transport ATP-binding protein DppD (TC 3.A.1.5.2)	0.380536	0.593323	0.000691072	0.000168961
Carbohydrates;Central carbohydrate metabolism;Glycolysis_and_Gluconeogenesis;Fructose-1,6-bisphosphatase, type I (EC 3.1.3.11)	0.0592129	0.165043	0.000908926	0.000388153
RNA Metabolism;RNA processing and modification;tRNA_processing;Ribonuclease D (EC 3.1.26.3)	0.0368358	0.11471	0.000845445	0.000325363
Amino Acids and Derivatives;Alanine, serine, and glycine;Alanine_biosynthesis;Cysteine desulfurase CsdA-CsdE (EC 2.8.1.7), main protein CsdA	0.083524	0.210533	0.00054247	2.28325e-05
Carbohydrates;Monosaccharides;D-Galacturonate_and_D-Glucuronate_Utilization;2-keto-3-deoxygluconate permease (KDG permease)	0.0210334	0.0736648	0.000805048	0.000286548
Nucleosides and Nucleotides;Pseudouridine_catabolism	0.994831	0.999985	0.000517943	0
Virulence;Iron Scavenging Mechanisms;Iron_acquisition_in_Vibrio;2,3-dihydroxybenzoate-AMP ligase (EC 2.7.7.58)	0.992638	0.999985	0.000517943	0
RNA Metabolism;RNA processing and modification;Methylthiotransferases	0.00371356	0.0187088	0.0526441	0.0521278
Carbohydrates;Di- and oligosaccharides;Maltose_and_Maltodextrin_Utilization;PTS system, maltose and glucose-specific IIC component (EC 2.7.1.69)	0.334768	0.546965	0.00184815	0.00133228
Amino Acids and Derivatives;Lysine, threonine, methionine, and cysteine;Lysine_fermentation;L-beta-lysine 5,6-aminomutase alpha subunit (EC 5.4.3.3)	0.60088	0.812931	0.00124941	0.000735207
Respiration;Electron donating reactions;Respiratory_Complex_I;NADH-ubiquinone oxidoreductase chain M (EC 1.6.5.3)	0.992488	0.999985	0.000512172	0
Amino Acids and Derivatives;Lysine, threonine, methionine, and cysteine;Cysteine_Biosynthesis;Cystathionine beta-synthase (EC 4.2.1.22)	0.92269	0.999985	0.000633362	0.000125579
Amino Acids and Derivatives;Arginine; urea cycle, polyamines;Arginine_and_Ornithine_Degradation	0.127738	0.284517	0.0528836	0.0523766
Cell Wall and Capsule;Capsular and extracellular polysacchrides;Extracellular_Polysaccharide_Biosynthesis_of_Streptococci;Galactosyl transferase CpsE (EC 2.7.8.-)	0.268485	0.479313	0.00215834	0.00165193
Plant-Prokaryote DOE project;At4g38090;Protoporphyrinogen IX oxidase, oxygen-independent, HemG (EC 1.3.-.-)	0.0395289	0.121136	0.000916139	0.000409844
Cofactors, Vitamins, Prosthetic Groups, Pigments;NAD and NADP;NAD_and_NADP_cofactor_biosynthesis_global;Nicotinamide phosphoribosyltransferase (EC 2.4.2.12)	0.0376504	0.116586	0.000512172	6.84975e-06
Clustering-based subsystems;Conserved_cluster_in_Enterobacteriaceae_downstream_from_YqjA,_a_DedA_family_protein	0.994927	0.999985	0.000504959	0
Clustering-based subsystems;Conserved_cluster_in_Enterobacteriaceae_downstream_from_YqjA,_a_DedA_family_protein;DedA family inner membrane protein YqjA	0.994927	0.999985	0.000504959	0
Amino Acids and Derivatives;Aromatic amino acids and derivatives;Aromatic_amino_acid_degradation;Phenylalanine-specific permease	0.998437	0.999985	0.000502073	0
Nucleosides and Nucleotides;Hydantoin_metabolism;N-methylhydantoinase A (EC 3.5.2.14)	0.681923	0.891549	0.00080072	0.000299106
RNA Metabolism;RNA processing and modification;tRNA_modification_Bacteria;tRNA pseudouridine 13 synthase (EC 4.2.1.-)	0.0774849	0.198141	0.000507844	6.84975e-06
Membrane Transport;ABC transporters;ABC_transporter_oligopeptide_(TC_3.A.1.5.1);Oligopeptide transport ATP-binding protein OppF (TC 3.A.1.5.1)	0.494929	0.705027	0.00148025	0.000979515
Carbohydrates;Monosaccharides;D-gluconate_and_ketogluconates_metabolism;2-ketoaldonate reductase, broad specificity (EC 1.1.1.215) (EC 1.1.1.-)	0.995056	0.999985	0.00050063	0
Fatty Acids, Lipids, and Isoprenoids;Polyhydroxybutyrate_metabolism;3-hydroxybutyryl-CoA dehydrogenase (EC 1.1.1.157)	0.513229	0.724126	0.000748782	0.000248874
Respiration;Electron donating reactions;Respiratory_dehydrogenases_1;D-Lactate dehydrogenase (EC 1.1.2.5)	0.254431	0.463685	0.000564111	6.50727e-05
Carbohydrates;Di- and oligosaccharides;Maltose_and_Maltodextrin_Utilization;Maltose/maltodextrin transport ATP-binding protein MalK (EC 3.6.3.19)	0.99508	0.999985	0.000497745	0
Plant-Prokaryote DOE project;Experimental-Ubiquinone_BiosynthesisVDC;Protein YigP (COG3165) clustered with ubiquinone biosynthetic genes	0.992401	0.999985	0.000494859	0
Clustering-based subsystems;CBSS-87626.3.peg.3639;2-octaprenyl-6-methoxyphenol hydroxylase (EC 1.14.13.-)	0.994908	0.999985	0.000490531	0
Cofactors, Vitamins, Prosthetic Groups, Pigments;NAD and NADP;NAD_and_NADP_cofactor_biosynthesis_global;NadR transcriptional regulator	0.994902	0.999985	0.000490531	0
Carbohydrates;Sugar alcohols;Ethanolamine_utilization;ATP:Cob(I)alamin adenosyltransferase (EC 2.5.1.17), ethanolamine utilization	0.128822	0.286107	0.000594408	0.00010503
Cofactors, Vitamins, Prosthetic Groups, Pigments;Thiamin_biosynthesis;Thiamin ABC transporter, substrate-binding component	0.0592305	0.165043	0.000499188	1.14163e-05
Virulence;Resistance to antibiotics and toxic compounds;Arsenic_resistance;Arsenic efflux pump protein	0.777493	0.987962	0.00270802	0.0022216
Nitrogen Metabolism;Denitrification;Nitric-oxide reductase (EC 1.7.99.7), quinol-dependent	0.0128075	0.0508818	0.000496302	1.02746e-05
DNA Metabolism;DNA replication;DNA_replication,_archaeal;Archaeal DNA polymerase II small subunit (EC 2.7.7.7)	0.999947	0.999985	0.000483318	0
Cell Wall and Capsule;Gram-Negative cell wall components;LOS_core_oligosaccharide_biosynthesis;Phosphoheptose isomerase 1 (EC 5.3.1.-)	0.435066	0.642335	0.00194337	0.00146014
Clustering-based subsystems;Conjugative_transfer_related_cluster;IncF plasmid conjugative transfer pilus assembly protein TraU	0.0491252	0.144338	0.000523714	4.10985e-05
Clustering-based subsystems;Clustering-based subsystems;Putative_diaminopropionate_ammonia-lyase_cluster;SsnA protein	0.0699849	0.184881	0.000496302	1.71244e-05
Amino Acids and Derivatives;Arginine; urea cycle, polyamines;Polyamine_Metabolism;Putrescine/proton symporter, putrescine/ornithine antiporter PotE	0.0727868	0.189808	0.00076898	0.000289973
Amino Acids and Derivatives;Arginine; urea cycle, polyamines;Urea_decomposition;Urea ABC transporter, urea binding protein	0.212415	0.409202	0.001033	0.00055483
Nitrogen Metabolism;Nitrate_and_nitrite_ammonification;NrfD protein	0.0930004	0.227131	0.00102146	0.000543414
RNA Metabolism;RNA processing and modification;tRNA_processing;Ribonuclease PH (EC 2.7.7.56)	0.111385	0.259674	0.00125085	0.000774022
Amino Acids and Derivatives;Lysine, threonine, methionine, and cysteine;Methionine_Salvage;Methylthioribulose-1-phosphate dehydratase (EC 4.2.1.109)	0.045535	0.135759	0.00080072	0.000324222
Cell Wall and Capsule;Recycling_of_Peptidoglycan_Amino_Sugars	0.0403586	0.122937	0.00080072	0.000324222
Cell Wall and Capsule;Recycling_of_Peptidoglycan_Amino_Sugars;Beta N-acetyl-glucosaminidase (EC 3.2.1.52)	0.0403586	0.122937	0.00080072	0.000324222
Plasmids;Plasmid transfer;Plasmid-encoded_T-DNA_transfer;Inner membrane protein of type IV secretion of T-DNA complex, TonB-like, VirB10	0.995089	0.999985	0.000476104	0
Respiration;Electron donating reactions;Respiratory_Complex_I;NADH-ubiquinone oxidoreductase chain G (EC 1.6.5.3)	0.348684	0.560662	0.000962307	0.000487474
Stress Response;Phage_shock_protein_(psp)_operon	0.992706	0.999985	0.000474661	0
Stress Response;Phage_shock_protein_(psp)_operon;Psp operon transcriptional activator	0.992706	0.999985	0.000474661	0
Respiration;Electron donating reactions;Respiratory_dehydrogenases_1;Anaerobic glycerol-3-phosphate dehydrogenase subunit B (EC 1.1.5.3)	0.0224918	0.0779215	0.000585752	0.000111879
Cell Wall and Capsule;Gram-Negative cell wall components;LOS_core_oligosaccharide_biosynthesis;3-deoxy-D-manno-octulosonic-acid transferase (EC 2.-.-.-)	0.568969	0.782689	0.0147448	0.0142726
Sulfur Metabolism;Organic sulfur assimilation;Taurine_Utilization;Taurine transport system permease protein TauC	0.618386	0.829038	0.00116285	0.000691825
Cofactors, Vitamins, Prosthetic Groups, Pigments;Thiamin_biosynthesis;Thiazole biosynthetic enzyme Thi4	0.332733	0.54536	0.00136195	0.000892751
Respiration;Electron donating reactions;Formate_dehydrogenase;Formate dehydrogenase O gamma subunit (EC 1.2.1.2)	0.0646567	0.175133	0.000693957	0.0002249
RNA Metabolism;Transcription;Transcription_initiation,_bacterial_sigma_factors;RNA polymerase sigma factor RpoH	0.0719013	0.188351	0.000867086	0.000401852
Clustering-based subsystems;proteosome related;Cluster-based_Subsystem_Grouping_Hypotheticals_-_perhaps_Proteosome_Related;Pup ligase PafA, possible component of postulated heterodimer PafA-PafA'	8.26653e-07	1.40368e-05	0.000486203	2.16909e-05
Carbohydrates;beta-glucuronide_utilization;Transcriptional repressor UidR	0.314351	0.525146	0.00871414	0.00825053
Phosphorus Metabolism;Phosphate_metabolism;Phosphate starvation-inducible ATPase PhoH with RNA binding motif	0.0706555	0.18576	0.000812262	0.000350479
Amino Acids and Derivatives;Lysine, threonine, methionine, and cysteine;Lysine_degradation;Glutarate-semialdehyde dehydrogenase (EC 1.2.1.20)	0.998359	0.999985	0.000461676	0
Sulfur Metabolism;Inorganic sulfur assimilation	0.200542	0.394424	0.00749791	0.00703698
Sulfur Metabolism;Inorganic sulfur assimilation;Inorganic_Sulfur_Assimilation	0.200542	0.394424	0.00749791	0.00703698
Membrane Transport;ABC transporters;ABC_transporter_peptide_(TC_3.A.1.5.5)	0.0256415	0.0863467	0.000464562	4.5665e-06
Membrane Transport;ABC transporters;ABC_transporter_peptide_(TC_3.A.1.5.5);Peptide transport system ATP-binding protein SapD (TC 3.A.1.5.5)	0.0256415	0.0863467	0.000464562	4.5665e-06
Virulence;Iron Scavenging Mechanisms;Iron(III)_dicitrate_transport_system_Fec;Iron(III) dicitrate transport ATP-binding protein FecE (TC 3.A.1.14.1)	0.34208	0.554385	0.000734354	0.000275132
Regulation and Cell signaling;cAMP_signaling_in_bacteria;Cyclic AMP receptor protein	0.00437147	0.0213525	0.000598737	0.000141562
RNA Metabolism;RNA processing and modification;tRNA_modification_Bacteria;tRNA:Cm32/Um32 methyltransferase	0.104106	0.246891	0.000471776	1.48411e-05
Cofactors, Vitamins, Prosthetic Groups, Pigments;Coenzyme B	0.970636	0.999985	0.00201695	0.0015606
Cofactors, Vitamins, Prosthetic Groups, Pigments;Coenzyme B;Coenzyme_B_synthesis	0.970636	0.999985	0.00201695	0.0015606
Plasmids;Plasmid transfer;Plasmid-encoded_T-DNA_transfer;ATPase required for both assembly of type IV secretion complex and secretion of T-DNA complex, VirB4	0.274543	0.485753	0.00131578	0.000859644
Cofactors, Vitamins, Prosthetic Groups, Pigments;Biotin;Biotin_biosynthesis;ATPase component BioM of energizing module of biotin ECF transporter	0.993979	0.999985	0.000455906	0
Clustering-based subsystems;CBSS-176280.1.peg.1561;Two component transcriptional regulator VraR	0.155501	0.328138	0.0217536	0.0212982
Amino Acids and Derivatives;Aromatic amino acids and derivatives;Common_Pathway_For_Synthesis_of_Aromatic_Compounds_(DAHP_synthase_to_chorismate);Shikimate 5-dehydrogenase I alpha (EC 1.1.1.25)	0.449653	0.656568	0.0103978	0.00994356
Regulation and Cell signaling;DNA-binding_regulatory_proteins,_strays;LysR family transcriptional regulator YbhD	0.211854	0.408734	0.0026128	0.00215881
Photosynthesis	0.285866	0.494738	0.0340775	0.0336243
Respiration;Electron donating reactions;Hydrogenases;Uptake hydrogenase large subunit (EC 1.12.99.6)	0.231037	0.432647	0.00178755	0.00133456
Virulence;Iron Scavenging Mechanisms;Heme,_hemin_uptake_and_utilization_systems_in_GramPositives;Iron compound ABC uptake transporter permease protein	0.416424	0.624635	0.00261713	0.00216452
Cell Wall and Capsule;Capsular and extracellular polysacchrides;Rhamnose_containing_glycans;Capsular polysaccharide export system protein KpsC	0.35833	0.57197	0.000464562	1.25579e-05
Protein Metabolism;Protein biosynthesis;tRNA_aminoacylation,_Gly;Glycyl-tRNA synthetase alpha chain (EC 6.1.1.14)	0.205266	0.399226	0.00110947	0.000657576
Carbohydrates;Sugar alcohols;Mannitol_Utilization;PTS system, mannitol-specific cryptic IIC component (EC 2.7.1.69)	0.994906	0.999985	0.000451577	0
Phages, Prophages, Transposable elements;Staphylococcal_phi-Mu50B-like_prophages;phi 11 orf33 homolog [SA bacteriophages 11, Mu50B]	0.999944	0.999985	0.000450135	0
RNA Metabolism;RNA processing and modification;rRNA_modification_Bacteria;Ribosomal RNA small subunit methyltransferase F (EC 2.1.1.-)	0.995016	0.999985	0.000450135	0
Protein Metabolism;Protein folding;Periplasmic_disulfide_interchange;Thiol:disulfide interchange protein DsbC	0.0725887	0.18942	0.0006954	0.000245449
Clustering-based subsystems;EC699-706;Deoxyribodipyrimidine photolyase (EC 4.1.99.3)	0.99833	0.999985	0.000445806	0
Membrane Transport;ECF_class_transporters;Duplicated ATPase component YkoD of energizing module of thiamin-regulated ECF transporter for HydroxyMethylPyrimidine	0.960079	0.999985	0.000494859	4.90899e-05
RNA Metabolism;RNA processing and modification;Queuosine-Archaeosine_Biosynthesis;Putative preQ0 transporter	0.67522	0.884288	0.00663227	0.00618875
Cell Wall and Capsule;Capsular and extracellular polysacchrides;Phosphorylcholine_incorporation_in_LPS;Choline kinase (EC 2.7.1.32)	0.663424	0.872998	0.00145572	0.00101262
Membrane Transport;Ferrous_iron_transporter_EfeUOB,_low-pH-induced	0.0416291	0.126066	0.000448692	5.70813e-06
Membrane Transport;Ferrous_iron_transporter_EfeUOB,_low-pH-induced;Ferrous iron transport peroxidase EfeB	0.0416291	0.126066	0.000448692	5.70813e-06
Cell Wall and Capsule;Gram-Positive cell wall components;Teichuronic_acid_biosynthesis;Putative N-acetylgalactosaminyl-diphosphoundecaprenol glucuronosyltransferase	0.996107	0.999985	0.00296627	0.00252413
Carbohydrates;Monosaccharides;D-allose_utilization	0.291192	0.500307	0.00156104	0.00111993
Nucleosides and Nucleotides;Purines;Purine_conversions;Deoxyguanosinetriphosphate triphosphohydrolase (EC 3.1.5.1)	0.595818	0.807826	0.0109994	0.0105589
Respiration;Electron donating reactions;Hydrogenases;[Ni/Fe] hydrogenase, group 1, small subunit	0.0777364	0.198413	0.000451577	1.14163e-05
Nitrogen Metabolism;Nitrate_and_nitrite_ammonification;Respiratory nitrate reductase delta chain (EC 1.7.99.4)	0.200992	0.394905	0.000473218	3.31071e-05
Clustering-based subsystems;CBSS-87626.3.peg.3639;2-octaprenyl-3-methyl-6-methoxy-1,4-benzoquinol hydroxylase (EC 1.14.13.-)	0.0041334	0.0204492	0.000450135	1.02746e-05
Virulence;Iron Scavenging Mechanisms;Iron(III)_dicitrate_transport_system_Fec;Iron(III) dicitrate transport system, periplasmic iron-binding protein FecB (TC 3.A.1.14.1)	0.00392464	0.0195926	0.000448692	1.02746e-05
Virulence;Iron Scavenging Mechanisms;Siderophore_assembly_kit;Ferric hydroxamate ABC transporter (TC 3.A.1.14.3), ATP-binding protein FhuC	0.0308017	0.0997644	0.000555455	0.000119871
Sulfur Metabolism;Organic sulfur assimilation;Alkanesulfonates_Utilization;FMN reductase (EC 1.5.1.29)	0.0246948	0.0838187	0.000509287	7.42057e-05
Cell Wall and Capsule;Gram-Positive cell wall components;Teichoic_and_lipoteichoic_acids_biosynthesis;Teichoic acid translocation permease protein TagG	0.291593	0.500307	0.00306149	0.00262688
Plant-Prokaryote DOE project;At5g37530;Membrane-bound lytic murein transglycosylase A precursor (EC 3.2.1.-)	0.100978	0.242036	0.000943551	0.000509165
Virulence;Resistance to antibiotics and toxic compounds;Beta-lactamase;Metal-dependent hydrolases of the beta-lactamase superfamily I	0.539889	0.751549	0.00828709	0.00785324
Carbohydrates;Di- and oligosaccharides;Lactose_and_Galactose_Uptake_and_Utilization;Tagatose 1,6-diphosphate aldolase (EC 4.1.2.40)	0.271588	0.482384	0.000470333	3.76736e-05
Clustering-based subsystems;CBSS-316407.3.peg.2816	0.995001	0.999985	0.000431379	0
Clustering-based subsystems;CBSS-316407.3.peg.2816;Protein involved in stability of MscS mechanosensitive channel	0.995001	0.999985	0.000431379	0
Membrane Transport;ECF_class_transporters;Substrate-specific component CbiM of cobalt ECF transporter	0.874094	0.999985	0.000701171	0.000272848
Clustering-based subsystems;CBSS-320372.3.peg.6046;Glutathione synthetase (EC 6.3.2.3)	1.30315e-08	3.27831e-07	0.000428493	1.14163e-06
Motility and Chemotaxis;Flagellar motility in Prokaryota;Flagellum;Flagellar basal-body rod protein FlgB	0.455892	0.663413	0.00125374	0.000826537
Cell Wall and Capsule;Gram-Negative cell wall components;LOS_core_oligosaccharide_biosynthesis;Lipopolysaccharide heptosyltransferase I (EC 2.4.1.-)	0.105599	0.249662	0.00072714	0.000300248
Cofactors, Vitamins, Prosthetic Groups, Pigments;Tetrapyrroles;Heme_and_Siroheme_Biosynthesis;Uroporphyrinogen III decarboxylase (EC 4.1.1.37)	0.0207386	0.0730801	0.000856987	0.000430393
Virulence;Type III, Type IV, Type VI, ESAT secretion systems;Toxin_co-regulated_pilus;Toxin co-regulated pilus biosynthesis protein I, chemoreceptor, negative regulator of TcpA	0.362675	0.576356	0.00149468	0.00107084
Nitrogen Metabolism;Nitrosative_stress;Nitric oxide reductase FlRd-NAD(+) reductase (EC 1.18.1.-)	0.998277	0.999985	0.000422723	0
Carbohydrates;Di- and oligosaccharides;Maltose_and_Maltodextrin_Utilization;Maltodextrin glucosidase (EC 3.2.1.20)	0.07016	0.184985	0.101358	0.100936
Amino Acids and Derivatives;Arginine; urea cycle, polyamines;Putrescine_utilization_pathways;Putrescine importer	0.309706	0.521148	0.000607393	0.000184943
Motility and Chemotaxis;Flagellar motility in Prokaryota;Flagellum;Flagellar biosynthesis protein FliP	0.903182	0.999985	0.00255365	0.00213141
Cell Wall and Capsule;Capsular and extracellular polysacchrides;Exopolysaccharide_Biosynthesis;Capsular polysaccharide synthesis enzyme CpsA, sugar transferase	0.00780288	0.0345607	0.000424165	3.42488e-06
Virulence;Pathogenicity islands;Staphylococcal_pathogenicity_islands_SaPI;Methionine ABC transporter substrate-binding protein	0.1832	0.369569	0.00791775	0.00749705
Plant-Prokaryote DOE project;At1g52510_AT4G12830_(COG0596);omega-3 polyunsaturated fatty acid synthase subunit, PfaA	0.624528	0.833498	0.00127538	0.000855077
Nucleosides and Nucleotides;Detoxification;Nudix_proteins_(nucleoside_triphosphate_hydrolases);Nudix-like NDP and NTP phosphohydrolase YmfB	0.172064	0.352042	0.000442921	2.28325e-05
Stress Response;Osmotic stress;Choline_and_Betaine_Uptake_and_Betaine_Biosynthesis;Osmotically activated L-carnitine/choline ABC transporter, ATP-binding protein OpuCA	0.607549	0.819361	0.000849773	0.000430393
Cofactors, Vitamins, Prosthetic Groups, Pigments;Quinone cofactors;Menaquinone_and_Phylloquinone_Biosynthesis;Menaquinone-specific isochorismate synthase (EC 5.4.4.2)	0.165169	0.340695	0.000600179	0.000181518
Cell Wall and Capsule;Capsular and extracellular polysacchrides;Sialic_Acid_Metabolism;N-acetylneuraminic acid outer membrane channel protein NanC	0.995057	0.999985	0.000418394	0
Motility and Chemotaxis;Flagellar motility in Prokaryota;Flagellum;Flagellar L-ring protein FlgH	0.992709	0.999985	0.000418394	0
Amino Acids and Derivatives;Arginine; urea cycle, polyamines;Putrescine_utilization_pathways;4-aminobutyraldehyde dehydrogenase (EC 1.2.1.19)	0.993039	0.999985	0.000415509	0
Carbohydrates;Organic acids;Propionate-CoA_to_Succinate_Module;2-methylcitrate synthase (EC 2.3.3.5)	0.99277	0.999985	0.000415509	0
Respiration;Electron donating reactions;Respiratory_Complex_I;NADH-ubiquinone oxidoreductase chain I (EC 1.6.5.3)	0.85546	0.999985	0.00489377	0.0044786
Metabolism of Aromatic Compounds;Salicylate_and_gentisate_catabolism;putative facilitator of salicylate uptake	0.202854	0.39674	0.00132732	0.000912159
Nitrogen Metabolism;Nitrate_and_nitrite_ammonification;Respiratory nitrate reductase gamma chain (EC 1.7.99.4)	0.206339	0.401111	0.000450135	3.53904e-05
Virulence;Type III, Type IV, Type VI, ESAT secretion systems;Type_III_secretion_system;Type III secretion inner membrane protein (YscU,SpaS,EscU,HrcU,SsaU, homologous to flagellar export components)	0.998406	0.999985	0.000414066	0
Cofactors, Vitamins, Prosthetic Groups, Pigments;Tetrapyrroles;Coenzyme_B12_biosynthesis;Aerobic cobaltochelatase CobS subunit (EC 6.6.1.2)	0.0176632	0.0648101	0.000429936	1.8266e-05
Carbohydrates;Monosaccharides;L-fucose_utilization_temp;L-fuconolactone hydrolase	0.414674	0.623128	0.00544923	0.00503799
RNA Metabolism;RNA processing and modification;RNA_pseudouridine_syntheses;tRNA pseudouridine synthase C (EC 4.2.1.70)	0.0244576	0.0832162	0.000474661	6.50727e-05
Fatty Acids, Lipids, and Isoprenoids;Phospholipids;Glycerolipid_and_Glycerophospholipid_Metabolism_in_Bacteria;CDP-diacylglycerol--serine O-phosphatidyltransferase (EC 2.7.8.8)	0.430393	0.638461	0.00883245	0.00842291
Protein Metabolism;Selenoproteins;Selenoprotein_O	0.128029	0.284517	0.000451577	4.33818e-05
Protein Metabolism;Selenoproteins;Selenoprotein_O;Selenoprotein O and cysteine-containing homologs	0.128029	0.284517	0.000451577	4.33818e-05
Respiration;Electron donating reactions;Coenzyme_F420-H2_dehydrogenase_(methanophenazine);Coenzyme F(420)H(2) dehydrogenase (methanophenazine) subunit FpoA	0.736821	0.94688	0.00294463	0.00253669
Clustering-based subsystems;Conjugative_transfer_related_cluster;IncF plasmid conjugative transfer pilus assembly protein TraW	0.0251147	0.0849095	0.000445806	3.88153e-05
RNA Metabolism;RNA processing and modification;tRNA_modification_Bacteria;Selenophosphate-dependent tRNA 2-selenouridine synthase	0.992745	0.999985	0.000406852	0
Carbohydrates;Di- and oligosaccharides;Trehalose_Uptake_and_Utilization;Glucose/mannose:H+ symporter GlcP	0.955306	0.999985	0.000478989	7.3064e-05
Carbohydrates;Monosaccharides;D-Sorbitol(D-Glucitol)_and_L-Sorbose_Utilization;PTS system, glucitol/sorbitol-specific IIB component and second of two IIC components (EC 2.7.1.69)	0.45787	0.665537	0.00100415	0.000599353
Amino Acids and Derivatives;Arginine; urea cycle, polyamines;Arginine_and_Ornithine_Degradation;Succinylglutamic semialdehyde dehydrogenase (EC 1.2.1.71)	0.994045	0.999985	0.000402524	0
Cell Wall and Capsule;Gram-Negative cell wall components;KDO2-Lipid_A_biosynthesis;2-Keto-3-deoxy-D-manno-octulosonate-8-phosphate synthase (EC 2.5.1.55)	0.523364	0.733052	0.0080173	0.00761578
Cell Wall and Capsule;Peptidoglycan_biosynthesis--gjo;D-alanine--D-alanine ligase B (EC 6.3.2.4)	0.0836201	0.210637	0.000551126	0.000150695
DNA Metabolism;DNA repair;DNA_repair,_bacterial_UvrD_and_related_helicases;DNA helicase IV	0.121402	0.275192	0.00254211	0.00214169
Membrane Transport;ECF_class_transporters;ATPase component STY3233 of energizing module of queuosine-regulated ECF transporter	0.0363462	0.11346	0.000435707	3.53904e-05
Clustering-based subsystems;CBSS-211586.1.peg.3133;RNA polymerase sigma factor RpoS	0.994979	0.999985	0.000399639	0
Clustering-based subsystems;Conjugative_transfer_related_cluster;IncF plasmid conjugative transfer pilus assembly protein TraF	0.965814	0.999985	0.000431379	3.19655e-05
Stress Response;Periplasmic Stress;Periplasmic_Stress_Response;Sigma factor RpoE negative regulatory protein RseB precursor	0.0437212	0.131559	0.000411181	1.36995e-05
Clustering-based subsystems;Conjugative_transfer_related_cluster;Periplasmic thiol:disulfide interchange protein DsbA	0.0641859	0.174225	0.000621821	0.000226042
Stress Response;Oxidative stress;Glutaredoxins;Glutaredoxin-related protein	0.337758	0.549965	0.000851216	0.000455509
Stress Response;Osmotic stress;Choline_and_Betaine_Uptake_and_Betaine_Biosynthesis;L-proline glycine betaine binding ABC transporter protein ProX (TC 3.A.1.12.1)	0.994808	0.999985	0.00039531	0
Respiration;Biogenesis_of_c-type_cytochromes;Cytochrome c heme lyase subunit CcmL	0.0244182	0.0832162	0.000554012	0.000160969
Phosphorus Metabolism;Phosphate_metabolism;Pyrophosphate-energized proton pump (EC 3.6.1.1)	0.333155	0.545434	0.000826689	0.000433818
Cell Wall and Capsule;Capsular and extracellular polysacchrides;Sialic_Acid_Metabolism;N-acetylmannosamine kinase (EC 2.7.1.60)	0.117414	0.268728	0.000415509	2.28325e-05
Carbohydrates;Central carbohydrate metabolism;Glycolate,_glyoxylate_interconversions;Glycolate dehydrogenase (EC 1.1.99.14), FAD-binding subunit GlcE	0.00856483	0.0372077	0.000481875	9.24717e-05
Motility and Chemotaxis;Flagellar motility in Prokaryota;Flagellum;Flagellar hook-associated protein FlgL	0.716172	0.92657	0.00546942	0.00508023
Clustering-based subsystems;proteosome related;Cluster-based_Subsystem_Grouping_Hypotheticals_-_perhaps_Proteosome_Related;Bacterial proteasome-activating AAA-ATPase (PAN)	1.93256e-07	3.87417e-06	0.000408295	1.94076e-05
Cofactors, Vitamins, Prosthetic Groups, Pigments;NAD and NADP;NAD_and_NADP_cofactor_biosynthesis_global;Ribosyl nicotinamide transporter, PnuC-like	0.681754	0.891549	0.00596573	0.00557684
Plant-Prokaryote DOE project;Experimental-PTPS;Dihydroneopterin aldolase (EC 4.1.2.25)	0.778254	0.987962	0.00367466	0.00328674
Respiration;Electron donating reactions;Formate_dehydrogenase;Formate dehydrogenase O alpha subunit (EC 1.2.1.2)	0.145316	0.31317	0.000556897	0.000170102
Clustering-based subsystems;proteosome related;Cluster-based_Subsystem_Grouping_Hypotheticals_-_perhaps_Proteosome_Related;Pup ligase PafA' paralog, possible component of postulated heterodimer PafA-PafA'	0.993574	0.999985	0.000386654	0
Protein Metabolism;Protein degradation;Proteasome_bacterial;ATP-dependent protease La (EC 3.4.21.53) Type II	0.36744	0.581289	0.000806491	0.000420118
Cell Wall and Capsule;Capsular and extracellular polysacchrides;Capsular_Polysaccharide_(CPS)_of_Campylobacter;Capsular polysaccharide export system periplasmic protein KpsD	0.998407	0.999985	0.000383769	0
Miscellaneous;ZZ_gjo_need_homes;Pyrrolidone-carboxylate peptidase (EC 3.4.19.3)	0.224475	0.424189	0.000831018	0.000447517
Respiration;Electron donating reactions;Respiratory_dehydrogenases_1;Aerobic glycerol-3-phosphate dehydrogenase (EC 1.1.5.3)	0.11161	0.26004	0.000911811	0.000528573
Respiration;Electron donating reactions;Succinate_dehydrogenase	0.0873399	0.216885	0.000390982	7.99138e-06
Carbohydrates;Sugar alcohols;Propanediol_utilization;Propanediol dehydratase medium subunit (EC 4.2.1.28)	0.388423	0.601868	0.000483318	0.000100463
Amino Acids and Derivatives;Lysine, threonine, methionine, and cysteine;Lysine_degradation	0.304938	0.514745	0.000666545	0.000285406
Membrane Transport;General transport systems;General_Secretion_Pathway;General secretion pathway protein H	0.995037	0.999985	0.000380883	0
Carbohydrates;Monosaccharides;L-fucose_utilization;Lactaldehyde dehydrogenase involved in fucose or rhamnose utilization (EC 1.2.1.22)	0.995188	0.999985	0.00037944	0
Miscellaneous;Luciferases	0.90851	0.999985	0.00119315	0.000815121
Cell Wall and Capsule;Gram-Negative cell wall components;Major_Outer_Membrane_Proteins;Outer membrane protein N precursor	0.995392	0.999985	0.000377998	0
Carbohydrates;One-carbon Metabolism;Methanogenesis_from_methylated_compounds	0.271712	0.482384	0.00140956	0.00103203
Carbohydrates;One-carbon Metabolism;Methanogenesis_from_methylated_compounds;Methylcobalamin:coenzyme M methyltransferase, methanol-specific	0.271712	0.482384	0.00140956	0.00103203
Cofactors, Vitamins, Prosthetic Groups, Pigments;NAD and NADP;NAD_and_NADP_cofactor_biosynthesis_global;NAD synthetase (EC 6.3.1.5)	0.0250867	0.0849095	0.000422723	4.79483e-05
Sulfur Metabolism;Inorganic sulfur assimilation;Inorganic_Sulfur_Assimilation;3'(2'),5'-bisphosphate nucleotidase (EC 3.1.3.7)	0.435298	0.642432	0.00188855	0.0015138
Carbohydrates;Aminosugars;Chitin_and_N-acetylglucosamine_utilization;Phosphatase NagD predicted to act in N-acetylglucosamine utilization subsystem	0.00962299	0.0408818	0.000913254	0.000542272
Virulence;Type III, Type IV, Type VI, ESAT secretion systems;Toxin_co-regulated_pilus	0.330628	0.543608	0.00178034	0.00140991
Virulence;Resistance to antibiotics and toxic compounds;Methicillin_resistance_in_Staphylococci;FemB, factor involved in methicillin resistance	0.379651	0.592726	0.000516501	0.000148411
Amino Acids and Derivatives;Arginine; urea cycle, polyamines;Arginine_and_Ornithine_Degradation;Succinylornithine transaminase (EC 2.6.1.81)	0.995182	0.999985	0.000367898	0
Clustering-based subsystems;Clustering-based subsystems;Putative_diaminopropionate_ammonia-lyase_cluster;Carbamate kinase-like protein YqeA	0.0847664	0.212071	0.000382326	1.59828e-05
Phages, Prophages, Transposable elements;Bacteriophage structural proteins;Phage_capsid_proteins;Capsid scaffolding protein	0.998202	0.999985	0.00036357	0
Clustering-based subsystems;Bacterial_Cell_Division;Cytoplasmic axial filament protein CafA and Ribonuclease G (EC 3.1.4.-)	0.472889	0.679668	0.0242106	0.0238474
Carbohydrates;Central carbohydrate metabolism;TCA_Cycle;Fumarate hydratase class II (EC 4.2.1.2)	0.994899	0.999985	0.00195635	0.00159371
Carbohydrates;Central carbohydrate metabolism;TCA_Cycle;Isocitrate dehydrogenase [NAD] (EC 1.1.1.41)	0.429326	0.638022	0.00160288	0.00124095
Amino Acids and Derivatives;Alanine, serine, and glycine;Glycine_and_Serine_Utilization;D-serine dehydratase transcriptional activator	0.314256	0.525146	0.000393868	3.19655e-05
Virulence;Iron Scavenging Mechanisms;Iron_acquisition_in_Vibrio;Bacterioferritin	0.0662971	0.178197	0.000568439	0.000206634
Regulation and Cell signaling;cAMP_signaling_in_bacteria;Hydrolase, alpha/beta fold family functionally coupled to Phosphoribulokinase	0.0693574	0.183995	0.00066366	0.000302531
Miscellaneous;ZZ_gjo_need_homes	0.0253558	0.0855878	0.132325	0.131965
Plant-Prokaryote DOE project;Experimental-PTPS;2-amino-4-hydroxy-6-hydroxymethyldihydropteridine pyrophosphokinase (EC 2.7.6.3)	0.410008	0.618386	0.0108624	0.0105041
Clustering-based subsystems;CBSS-83332.1.peg.3803	0.893955	0.999985	0.00962163	0.00926429
Virulence;Resistance to antibiotics and toxic compounds;Methicillin_resistance_in_Staphylococci;Poly(glycerophosphate chain) D-alanine transfer protein DltD	0.993275	0.999985	0.000356357	0
Carbohydrates;Fermentation;Acetone_Butanol_Ethanol_Synthesis;NADH-dependent butanol dehydrogenase B (EC 1.1.1.-)	0.578138	0.789097	0.00045302	9.70382e-05
Stress Response;Oxidative stress;Glutathione:_Non-redox_reactions;Lactoylglutathione lyase (EC 4.4.1.5)	0.222881	0.423308	0.00822361	0.00786808
Cell Wall and Capsule;Recycling_of_Peptidoglycan_Amino_Acids;Periplasmic Murein Peptide-Binding Protein MppA	0.144437	0.311799	0.000438593	8.44803e-05
Membrane Transport;Transport_of_Nickel_and_Cobalt;Nickel transport ATP-binding protein NikE (TC 3.A.1.5.3)	0.994827	0.999985	0.000353471	0
Virulence;Siderophore_Enterobactin;Ferric enterobactin transport system permease protein FepG (TC 3.A.1.14.2)	0.994908	0.999985	0.000353471	0
Phages, Prophages, Transposable elements;Bacteriophage structural proteins;Phage_tail_fiber_proteins;Phage tail fibers	0.420578	0.62915	0.000385211	3.19655e-05
Virulence;Iron Scavenging Mechanisms;Siderophore_Yersiniabactin_Biosynthesis;iron aquisition yersiniabactin synthesis enzyme (Irp3)	0.95227	0.999985	0.000444364	9.133e-05
Nucleosides and Nucleotides;Pseudouridine_catabolism;Inner membrane transport protein YeiM, in cluster with pseudouridine metabolism operon	0.994949	0.999985	0.000352028	0
Clustering-based subsystems;Clustering-based subsystems;Putative_diaminopropionate_ammonia-lyase_cluster;Putative diaminopropionate ammonia-lyase (EC 4.3.1.15)	0.051044	0.14839	0.000603065	0.000251158
RNA Metabolism;RNA processing and modification;tRNA_modification_Bacteria;tRNA (uridine-5-oxyacetic acid methyl ester) 34 synthase	0.099792	0.240363	0.000369341	1.8266e-05
Amino Acids and Derivatives;Lysine, threonine, methionine, and cysteine;Cysteine_Biosynthesis;Sulfate transporter, CysZ-type	0.995744	0.999985	0.000350586	0
Nitrogen Metabolism;Nitrate_and_nitrite_ammonification;Nitrite transporter NirC	0.798901	0.999985	0.000480432	0.000131287
Respiration;Biogenesis_of_cytochrome_c_oxidases;Heme O synthase, protoheme IX farnesyltransferase (EC 2.5.1.-) COX10-CtaB	0.994745	0.999985	0.000346257	0
Virulence;Iron Scavenging Mechanisms;Siderophore_assembly_kit;Ferric hydroxamate ABC transporter (TC 3.A.1.14.3), periplasmic substrate binding protein FhuD	0.995475	0.999985	0.000346257	0
Virulence;Siderophore_Enterobactin;Ferric enterobactin transport system permease protein FepD (TC 3.A.1.14.2)	0.995009	0.999985	0.000346257	0
Carbohydrates;Monosaccharides;D-Sorbitol(D-Glucitol)_and_L-Sorbose_Utilization;PTS system, glucitol/sorbitol-specific IIC component (EC 2.7.1.69)	0.719877	0.930738	0.000530928	0.000184943
Respiration;Electron accepting reactions;Terminal_cytochrome_oxidases;Cytochrome O ubiquinol oxidase subunit II (EC 1.10.3.-)	0.995004	0.999985	0.000344815	0
RNA Metabolism;RNA processing and modification;tRNA_modification_Bacteria;Chaperone protein HscB	0.0093693	0.0399805	0.000382326	3.76736e-05
Stress Response;Oxidative stress;Protection_from_Reactive_Oxygen_Species;Manganese superoxide dismutase (EC 1.15.1.1)	0.880922	0.999985	0.00100992	0.000665568
RNA Metabolism;RNA processing and modification;rRNA_modification_Bacteria;Ribosomal RNA large subunit methyltransferase E (EC 2.1.1.-)	0.0452325	0.135066	0.000532371	0.00018951
Carbohydrates;CO2 fixation;Calvin-Benson_cycle;Phosphoribulokinase (EC 2.7.1.19)	0.994677	0.999985	0.000341929	0
Virulence;Iron Scavenging Mechanisms;Siderophore_assembly_kit;Ferric reductase (1.6.99.14)	0.994729	0.999985	0.000341929	0
Cofactors, Vitamins, Prosthetic Groups, Pigments;Quinone cofactors;Ubiquinone_Biosynthesis	0.994789	0.999985	0.000340486	0
Cofactors, Vitamins, Prosthetic Groups, Pigments;Quinone cofactors;Ubiquinone_Biosynthesis;NAD(P)H-flavin reductase (EC 1.5.1.29) (EC 1.16.1.3)	0.994789	0.999985	0.000340486	0
Phosphorus Metabolism;Phosphate_metabolism;Soluble pyridine nucleotide transhydrogenase (EC 1.6.1.1)	0.375818	0.588975	0.00253922	0.00219877
Virulence;Resistance to antibiotics and toxic compounds;USS-DB-4;Transcriptional regulator, TetR (AcrR) family [USSDB4A]	0.188343	0.377151	0.000493417	0.000154119
Amino Acids and Derivatives;Alanine, serine, and glycine;Alanine_biosynthesis;Valine--pyruvate aminotransferase (EC 2.6.1.66)	0.268179	0.479212	0.000826689	0.000487474
Amino Acids and Derivatives;Arginine; urea cycle, polyamines;Arginine_Biosynthesis_extended;Acetylornithine deacetylase (EC 3.5.1.16)	0.00466433	0.0224975	0.000445806	0.000107313
Cofactors, Vitamins, Prosthetic Groups, Pigments;Coenzyme F420;Coenzyme_F420_synthesis;Lactyl (2) diphospho-(5')guanosine:7,8-didemethyl-8-hydroxy-5-deazariboflavin 2-phospho-L-lactate transferase	0.83854	0.999985	0.000614607	0.000276273
Nitrogen Metabolism;Nitrosative_stress;NADH oxidoreductase hcr (EC 1.-.-.-)	0.994864	0.999985	0.000337601	0
Amino Acids and Derivatives;Histidine Metabolism;Histidine_Biosynthesis;Phosphoribosyl-ATP pyrophosphatase (EC 3.6.1.31)	0.8176	0.999985	0.000643462	0.000305956
Fatty Acids, Lipids, and Isoprenoids;Fatty acids;Fatty_Acid_Biosynthesis_FASII;Holo-[acyl-carrier protein] synthase, alternative (EC 2.7.8.7)	0.09675	0.234355	0.0012321	0.000895034
Amino Acids and Derivatives;Alanine, serine, and glycine;Glycine_cleavage_system;Glycine cleavage system transcriptional activator GcvA	0.0504303	0.147021	0.000719927	0.000383586
Photosynthesis;Proteorhodopsin	0.282343	0.49209	0.0338856	0.0335501
Protein Metabolism;Secretion;HtrA_and_Sec_secretion;Serine protease, DegP/HtrA, do-like (EC 3.4.21.-)	0.295515	0.503291	0.00134319	0.00100806
RNA Metabolism;RNA processing and modification;tRNA_modification_Bacteria;tRNA (5-methoxyuridine) 34 synthase	0.998047	0.999985	0.000334715	0
Virulence;Resistance to antibiotics and toxic compounds;Cobalt-zinc-cadmium_resistance;Zinc transporter ZitB	0.995243	0.999985	0.000334715	0
Carbohydrates;Central carbohydrate metabolism;Dehydrogenase_complexes;Acetoin dehydrogenase E1 component alpha-subunit (EC 1.2.4.-)	0.273732	0.485304	0.000551126	0.000216909
Metabolism of Aromatic Compounds;Aromatic_Amin_Catabolism;3,4-dihydroxyphenylacetate 2,3-dioxygenase (EC 1.13.11.15)	0.280838	0.491116	0.000463119	0.000129004
Clustering-based subsystems;Putrescine/GABA utilization cluster-temporal,to add to SSs;GABA_and_putrescine_metabolism_from_cluters;Putrescine transport ATP-binding protein PotG (TC 3.A.1.11.2)	0.358429	0.57197	0.000838231	0.000504598
Phosphorus Metabolism;Phosphate_metabolism;Phosphate transport system permease protein PstC (TC 3.A.1.7.1)	0.0650167	0.175737	0.0171571	0.0168264
Cell Wall and Capsule;Gram-Negative cell wall components;KDO2-Lipid_A_biosynthesis;LptA, protein essential for LPS transport across the periplasm	0.0464209	0.137866	0.000528042	0.000198643
Amino Acids and Derivatives;Arginine; urea cycle, polyamines;Urea_carboxylase_and_Allophanate_hydrolase_cluster;Allophanate hydrolase (EC 3.5.1.54)	0.711555	0.920907	0.000603065	0.00027399
Plant-Prokaryote DOE project;Experimental-PTPS;FolM Alternative dihydrofolate reductase 1	0.00699021	0.0316906	0.000476104	0.00014727
Cell Wall and Capsule;Capsular and extracellular polysacchrides;Polysaccharide_deacetylases	0.0802878	0.203726	0.0220768	0.021748
Cell Wall and Capsule;Capsular and extracellular polysacchrides;Polysaccharide_deacetylases;Peptidoglycan N-acetylglucosamine deacetylase (EC 3.5.1.-)	0.0802878	0.203726	0.0220768	0.021748
Cofactors, Vitamins, Prosthetic Groups, Pigments;Tetrapyrroles;Coenzyme_B12_biosynthesis;Aerobic cobaltochelatase CobT subunit (EC 6.6.1.2)	0.999956	0.999985	0.000326059	0
Cell Wall and Capsule;Peptidoglycan_Biosynthesis;Murein-DD-endopeptidase (EC 3.4.99.-)	0.0978559	0.236587	0.000455906	0.000130145
Virulence;Regulation of virulence;Two-component_Response_Regulator_of_Virulence_ResDE;DNA-binding response regulator ResD	0.247398	0.454744	0.00725986	0.00693537
Membrane Transport;ECF_class_transporters;Transmembrane component CbiQ of energizing module of cobalt ECF transporter	0.493519	0.7038	0.000675202	0.000351621
Membrane Transport;Transport_of_Manganese;Manganese ABC transporter, inner membrane permease protein SitD	0.998012	0.999985	0.000321731	0
Stress Response;Periplasmic Stress;Periplasmic_Stress_Response;Sigma factor RpoE negative regulatory protein RseA	0.995929	0.999985	0.000321731	0
Fatty Acids, Lipids, and Isoprenoids;Fatty acids;Fatty_Acid_Biosynthesis_FASII;(3R)-hydroxymyristoyl-[acyl carrier protein] dehydratase (EC 4.2.1.-)	0.287508	0.495951	0.00451	0.00418862
Carbohydrates;beta-glucuronide_utilization;Glucuronide transport facilitator UidC	0.998005	0.999985	0.000318845	0
RNA Metabolism;RNA processing and modification;RNA_pseudouridine_syntheses;Ribosomal large subunit pseudouridine synthase E (EC 4.2.1.70)	0.994945	0.999985	0.000318845	0
Virulence;Siderophore_Enterobactin;Isochorismate synthase (EC 5.4.4.2) [enterobactin] siderophore	0.995294	0.999985	0.000318845	0
RNA Metabolism;RNA processing and modification;tRNA_modification_Archaea;COG1180: Radical SAM, Pyruvate-formate lyase-activating enzyme like	0.77136	0.981476	0.000520829	0.000203209
Carbohydrates;Di- and oligosaccharides;Maltose_and_Maltodextrin_Utilization;Zinc-type alcohol dehydrogenase YcjQ	0.0185528	0.0674312	0.000372227	5.4798e-05
Virulence;Ton_and_Tol_transport_systems;iron-chelator utilization protein	0.99502	0.999985	0.000317403	0
Respiration;Soluble_cytochromes_and_functionally_related_electron_carriers;Putative diheme cytochrome c-553	0.623464	0.833024	0.00563822	0.00532112
Motility and Chemotaxis;Flagellar motility in Prokaryota;Flagellum;Flagellar basal-body rod protein FlgC	0.727787	0.938443	0.00133309	0.00101833
Potassium metabolism;Glutathione-regulated_potassium-efflux_system_and_associated_functions;Glutathione-regulated potassium-efflux system ancillary protein KefF	0.99519	0.999985	0.000314517	0
Carbohydrates;Di- and oligosaccharides;Trehalose_Uptake_and_Utilization;PTS system, trehalose-specific IIC component (EC 2.7.1.69)	0.438176	0.644948	0.00124508	0.000931566
Virulence;Quorum sensing and biofilm formation;Quorum-sensing_in_Vibrio;Quorum-sensing regulator of virulence HapR	0.401471	0.613442	0.000385211	7.3064e-05
Membrane Transport;Potassium_homeostasis;Potassium channel protein	0.998707	0.999985	0.000311632	0
Cofactors, Vitamins, Prosthetic Groups, Pigments;Coenzyme B;Coenzyme_B_synthesis;Coenzyme B synthesis from 2-oxoglutarate: steps 4, 7, 8, 11, and 12 [small subunit]	0.700945	0.911157	0.00031596	4.5665e-06
Respiration;Formate_hydrogenase;Formate hydrogenlyase subunit 7	0.46752	0.67647	0.0005266	0.000215767
Stress Response;Hfl_operon;HflK protein	0.243989	0.450198	0.00273543	0.00242481
Stress Response;Oxidative stress;Glutathione:_Non-redox_reactions;FIG005121: SAM-dependent methyltransferase (EC 2.1.1.-)	0.0447913	0.134165	0.000579981	0.000269424
Regulation and Cell signaling;Orphan_regulatory_proteins;Two-component system response regulator QseB	0.0328477	0.104922	0.000660774	0.000350479
Carbohydrates;Monosaccharides;D-allose_utilization;D-allose ABC transporter, ATPase component	0.736314	0.946584	0.000512172	0.000202068
Carbohydrates;Di- and oligosaccharides;Lactose_and_Galactose_Uptake_and_Utilization;Transcriptional repressor of the lac operon	0.270705	0.482116	0.00131722	0.00100806
RNA Metabolism;Transcription;Transcription_factors_bacterial;Transcription elongation factor GreB	0.055618	0.158288	0.000506401	0.000197501
Carbohydrates;Organic acids;Alpha-acetolactate_operon;Acetolactate synthase, catabolic (EC 2.2.1.6)	0.286487	0.495508	0.000375112	6.62143e-05
Sulfur Metabolism;Organic sulfur assimilation;Taurine_Utilization;Alpha-ketoglutarate-dependent taurine dioxygenase (EC 1.14.11.17)	0.994905	0.999985	0.000308746	0
Plasmids;Plasmid transfer;Plasmid-encoded_T-DNA_transfer;ATPase required for both assembly of type IV secretion complex and secretion of T-DNA complex, VirB11	0.415648	0.623958	0.000471776	0.000163252
Cofactors, Vitamins, Prosthetic Groups, Pigments;Coenzyme F420	0.259609	0.468246	0.0011715	0.000863069
Cofactors, Vitamins, Prosthetic Groups, Pigments;Coenzyme F420;Coenzyme_F420_synthesis	0.259609	0.468246	0.0011715	0.000863069
Clustering-based subsystems;Shiga toxin cluster;CBSS-194948.1.peg.143;phage replication protein P	0.994608	0.999985	0.000307303	0
Amino Acids and Derivatives;Alanine, serine, and glycine;Alanine_biosynthesis;Alanine racemase, catabolic (EC 5.1.1.1)	0.102832	0.244623	0.000646347	0.000340204
Amino Acids and Derivatives;Lysine, threonine, methionine, and cysteine;Methionine_Biosynthesis;Homoserine dehydrogenase (EC 1.1.1.3)	0.0145127	0.0559713	0.0404991	0.0401955
Stress Response;Carbon_Starvation;Stringent starvation protein B	0.0275101	0.0911243	0.000380883	7.76305e-05
Cell Wall and Capsule;Capsular and extracellular polysacchrides;Capsular_Polysaccharides_Biosynthesis_and_Assembly;Capsular polysaccharide export system protein KpsS	0.993669	0.999985	0.000302975	0
Stress Response;Oxidative stress;Protection_from_Reactive_Oxygen_Species;Superoxide dismutase [Cu-Zn] precursor (EC 1.15.1.1)	0.480868	0.689077	0.000715599	0.000413268
Respiration;Reverse electron transport;Archaeal_membrane_bound_hydrogenases;Energy conserving hydrogenase Eha ferredoxin (protein P2)	0.108709	0.254801	0.000313074	1.14163e-05
Stress Response;Oxidative stress;Glutathione:_Biosynthesis_and_gamma-glutamyl_cycle;Glutamate--cysteine ligase archaeal (EC 6.3.2.2)	0.997974	0.999985	0.000301532	0
Cofactors, Vitamins, Prosthetic Groups, Pigments;Molybdopterin_cytosine_dinucleotide;Periplasmic aromatic aldehyde oxidoreductase, molybdenum binding subunit YagR	0.12248	0.276496	0.000307303	6.84975e-06
Carbohydrates;Central carbohydrate metabolism;Pyruvate_Alanine_Serine_Interconversions	0.092745	0.226795	0.0505651	0.0502658
Virulence;Type III, Type IV, Type VI, ESAT secretion systems;Type_III_secretion_system;Type III secretion inner membrane channel protein (LcrD,HrcV,EscV,SsaV)	0.998395	0.999985	0.000298647	0
Carbohydrates;CO2 fixation;CO2_uptake,_carboxysome;carboxysome shell protein CsoS1	0.638975	0.850126	0.00156104	0.00126264
Fatty Acids, Lipids, and Isoprenoids;Polyhydroxybutyrate_metabolism;D-beta-hydroxybutyrate dehydrogenase (EC 1.1.1.30)	0.992591	0.999985	0.000297204	0
Cell Wall and Capsule;Gram-Positive cell wall components;Teichoic_and_lipoteichoic_acids_biosynthesis;Lipopolysaccharide cholinephosphotransferase LicD3 (EC 2.7.8.-)	0.815277	0.999985	0.00066366	0.000367603
Cell Wall and Capsule;Gram-Negative cell wall components;Lipopolysaccharide_assembly;Outer membrane protein Imp, required for envelope biogenesis	0.999953	0.999985	0.000295761	0
Amino Acids and Derivatives;Proline and 4-hydroxyproline	0.0360253	0.112733	0.0145774	0.0142829
Amino Acids and Derivatives;Proline and 4-hydroxyproline;Proline,_4-hydroxyproline_uptake_and_utilization	0.0360253	0.112733	0.0145774	0.0142829
Cofactors, Vitamins, Prosthetic Groups, Pigments;Riboflavin, FMN, FAD;Flavodoxin;Flavoprotein MioC	0.724699	0.935715	0.0045504	0.00425598
Protein Metabolism;Protein biosynthesis;Ribosome_LSU_bacterial;LSU ribosomal protein L34p	0.748249	0.957451	0.00174427	0.00144986
Motility and Chemotaxis;Flagellar motility in Prokaryota;Flagellum;Flagellar biosynthesis protein FliQ	0.324584	0.53636	0.0005266	0.000234033
Clustering-based subsystems;CBSS-630.2.peg.3360;Integral membrane protein YggT, involved in response to extracytoplasmic stress (osmotic shock)	0.175101	0.357172	0.000313074	2.16909e-05
Carbohydrates;Di- and oligosaccharides;Lactose_and_Galactose_Uptake_and_Utilization;Galactose operon repressor, GalR-LacI family of transcriptional regulators	0.995282	0.999985	0.0029201	0.00262916
Regulation and Cell signaling;Trans-envelope_signaling_system_VreARI_in_Pseudomonas;Extracytoplasmic function (ECF) sigma factor VreI	0.726845	0.937856	0.000499188	0.000208917
Clustering-based subsystems;Bacterial_Cell_Division;Cell division protein BolA	0.00100437	0.00650813	0.000289991	1.14163e-06
Clustering-based subsystems;Putrescine/GABA utilization cluster-temporal,to add to SSs;GABA_and_putrescine_metabolism_from_cluters;Putrescine ABC transporter putrescine-binding protein PotF (TC 3.A.1.11.2)	0.165122	0.340695	0.0187484	0.0184601
Respiration;Biogenesis_of_c-type_cytochromes;Cytochrome c-type biogenesis protein CcmC, putative heme lyase for CcmE	0.0678966	0.181285	0.000520829	0.000232892
Cofactors, Vitamins, Prosthetic Groups, Pigments;Quinone cofactors;Menaquinone_Biosynthesis_via_Futalosine_--_gjo;Menaquinone via futalosine step 3	0.401138	0.613226	0.000826689	0.000538847
Cell Division and Cell Cycle;Intracellular_septation_in_Enterobacteria;Intracellular septation protein IspA	0.0260863	0.0875161	0.000401081	0.000114163
Amino Acids and Derivatives;Aromatic amino acids and derivatives;Phenylalanine_and_Tyrosine_Branches_from_Chorismate;Aromatic amino acid aminotransferase gamma (EC 2.6.1.57)	0.614896	0.825797	0.000289991	3.42488e-06
Respiration;Formate_hydrogenase;formate dehydrogenase formation protein FdhE	0.11257	0.26153	0.000566996	0.00028084
Metabolism of Aromatic Compounds;Salicylate_and_gentisate_catabolism;Fumarylacetoacetate hydrolase family protein	0.608426	0.819396	0.00650098	0.00621501
Membrane Transport;General transport systems;General_Secretion_Pathway;General secretion pathway protein J	0.277632	0.489513	0.00037944	9.36133e-05
Clustering-based subsystems;Putative_hemin_transporter;putative hemin permease	0.1442	0.311463	0.000455906	0.000170102
Cell Wall and Capsule;Gram-Negative cell wall components;Outer_membrane;Outer membrane protein G precursor	0.99478	0.999985	0.00028422	0
Clustering-based subsystems;CBSS-316273.3.peg.227;Thiosulfate sulfurtransferase, rhodanese (EC 2.8.1.1)	0.136422	0.298889	0.000294319	1.14163e-05
Respiration;Electron accepting reactions;Anaerobic_respiratory_reductases;Flavodoxin reductases (ferredoxin-NADPH reductases) family 1	0.804929	0.999985	0.00137637	0.00109368
Carbohydrates;Central carbohydrate metabolism;Entner-Doudoroff_Pathway;OpcA, an allosteric effector of glucose-6-phosphate dehydrogenase, actinobacterial	0.998148	0.999985	0.000281334	0
Membrane Transport;Transport_of_Nickel_and_Cobalt;Nickel transport ATP-binding protein NikD (TC 3.A.1.5.3)	0.995013	0.999985	0.000281334	0
RNA Metabolism;RNA processing and modification;tRNA_modification_Bacteria;GTP cyclohydrolase I (EC 3.5.4.16) type 1	0.568357	0.782689	0.00778646	0.00750619
Respiration;Formate_hydrogenase;Hydrogenase-4 component B (EC 1.-.-.-)	0.120953	0.274579	0.000680973	0.000400711
Membrane Transport;General transport systems;General_Secretion_Pathway;General secretion pathway protein M	0.99454	0.999985	0.000279891	0
RNA Metabolism;RNA processing and modification;tRNA_modification_Bacteria;Iron-sulfur cluster assembly scaffold protein IscU	0.153764	0.325364	0.000298647	1.94076e-05
Respiration;Biogenesis_of_c-type_cytochromes;ABC transporter involved in cytochrome c biogenesis, CcmB subunit	0.0679173	0.181285	0.000470333	0.000191793
Amino Acids and Derivatives;Arginine; urea cycle, polyamines;Arginine_and_Ornithine_Degradation;Arginine N-succinyltransferase (EC 2.3.1.109)	0.995784	0.999985	0.000278449	0
Clustering-based subsystems;Putative_hemin_transporter;puatative hemin transporter subunit	0.99473	0.999985	0.000278449	0
Fatty Acids, Lipids, and Isoprenoids;Fatty acids;Phospholipid_and_Fatty_acid_biosynthesis_related_cluster;(3R)-hydroxymyristoyl-[ACP] dehydratase (EC 4.2.1.-)	0.798411	0.999985	0.00181929	0.00154119
Virulence;Type III, Type IV, Type VI, ESAT secretion systems;Type_III_secretion_system;Type III secretion possible injected virulence protein (YopM)	0.527725	0.737474	0.000688186	0.000410985
Stress Response;Oxidative stress;Glutaredoxins;Glutaredoxin 2	0.99525	0.999985	0.000277006	0
RNA Metabolism;RNA processing and modification;tRNA_modification_Bacteria;tRNA 5-methylaminomethyl-2-thiouridine synthase TusA	3.8602e-05	0.000407066	0.000313074	3.6532e-05
Respiration;Biogenesis_of_cytochrome_c_oxidases;Ferredoxin--NADP(+) reductase (EC 1.18.1.2)	0.0562034	0.159093	0.000466005	0.00018951
Protein Metabolism;Protein degradation;Protein_degradation;Deblocking aminopeptidase (EC 3.4.11.-)	0.338707	0.550775	0.00714589	0.0068703
Carbohydrates;Monosaccharides;D-gluconate_and_ketogluconates_metabolism;L-idonate, D-gluconate, 5-keto-D-gluconate transporter	0	0	0.000307303	3.19655e-05
Respiration;Electron accepting reactions;Anaerobic_respiratory_reductases;Vanillate O-demethylase oxidoreductase (EC 1.14.13.-)	0.356944	0.570784	0.000344815	6.96392e-05
Stress Response;Universal_stress_protein_family;Universal stress protein E	0.995362	0.999985	0.00027412	0
Carbohydrates;One-carbon Metabolism;Formaldehyde_assimilation:_Ribulose_monophosphate_pathway;D-arabino-3-hexulose 6-phosphate formaldehyde lyase	0.514617	0.725513	0.00136627	0.00109254
Respiration;Formate_hydrogenase;Formate hydrogenlyase subunit 6	0.0121314	0.0490997	0.00027412	1.14163e-06
RNA Metabolism;RNA processing and modification;RNA_pseudouridine_syntheses;Ribosomal large subunit pseudouridine synthase F (EC 4.2.1.70)	0.427105	0.635212	0.00316104	0.00288831
Carbohydrates;Di- and oligosaccharides;Maltose_and_Maltodextrin_Utilization;Maltodextrin phosphorylase (EC 2.4.1.1)	0.0749746	0.193806	0.00848763	0.00821514
Cell Wall and Capsule;Capsular and extracellular polysacchrides;Capsular_Polysaccharide_(CPS)_of_Campylobacter;Capsular polysaccharide export system inner membrane protein KpsE	0.998013	0.999985	0.000269792	0
Cofactors, Vitamins, Prosthetic Groups, Pigments;Quinone cofactors;Menaquinone_Biosynthesis_via_Futalosine_--_gjo;Gene SCO4494, often clustered with other genes in menaquinone via futalosine pathway	0.979976	0.999985	0.000799277	0.000529714
Amino Acids and Derivatives;Lysine, threonine, methionine, and cysteine;Cysteine_Biosynthesis;Sulfite reductase [NADPH] hemoprotein beta-component (EC 1.8.1.2)	0.193541	0.385328	0.00194193	0.00167248
Metabolism of Aromatic Compounds;Metabolism of central aromatic intermediates;Homogentisate_pathway_of_aromatic_compound_degradation;Maleylacetoacetate isomerase (EC 5.2.1.2)	0.99861	0.999985	0.000268349	0
Metabolism of Aromatic Compounds;Metabolism of central aromatic intermediates;Central_meta-cleavage_pathway_of_aromatic_compound_degradation;Acetaldehyde dehydrogenase, acetylating, (EC 1.2.1.10) in gene cluster for degradation of phenols, cresols, catechol	0.101653	0.24302	0.000317403	4.90899e-05
DNA Metabolism;YcfH;Deoxyribonuclease TatD	0.175569	0.357738	0.000311632	4.33818e-05
Carbohydrates;Organic acids;Alpha-acetolactate_operon	0.153291	0.3249	0.000483318	0.000216909
Clustering-based subsystems;Probably Ybbk-related hypothetical membrane proteins;CBSS-316057.3.peg.659;Putative stomatin/prohibitin-family membrane protease subunit YbbK	0.0135907	0.0532695	0.030739	0.0304734
Carbohydrates;Sugar_utilization_in_Thermotogales;Predicted beta-xyloside ABC transporter, permease component	0.944266	0.999985	0.000588638	0.00032308
Cell Division and Cell Cycle;Cell cycle in Prokaryota;MukBEF_Chromosome_Condensation;Chromosome partition protein MukE	0.994923	0.999985	0.000264021	0
Cell Division and Cell Cycle;Cell cycle in Prokaryota;Bacterial_Cytoskeleton;Cell division initiation protein DivIVA	0.162229	0.337277	0.00360829	0.00334496
Cofactors, Vitamins, Prosthetic Groups, Pigments;Thiamin_biosynthesis;Thiamin ABC transporter, ATPase component	0.0140586	0.0544931	0.00027412	1.25579e-05
Motility and Chemotaxis;Flagellar motility in Prokaryota;Flagellar_motility	0.823212	0.999985	0.00268927	0.00242824
Motility and Chemotaxis;Flagellar motility in Prokaryota;Flagellar_motility;Chemotaxis protein CheV (EC 2.7.3.-)	0.823212	0.999985	0.00268927	0.00242824
Cofactors, Vitamins, Prosthetic Groups, Pigments;Thiamin_biosynthesis;Thiamine kinase (EC 2.7.1.89)	0.998581	0.999985	0.000259693	0
Fatty Acids, Lipids, and Isoprenoids;Isoprenoids;Acyclic_terpenes_utilization;3-hydroxy-3isohexenylglutaryl-CoA:acetate lyase	0.501837	0.711945	0.00146294	0.00120327
Miscellaneous;ZZ_gjo_need_homes;Virulence factor MviM	0.152747	0.324149	0.000281334	2.28325e-05
Cofactors, Vitamins, Prosthetic Groups, Pigments;Tetrapyrroles;Heme_and_Siroheme_Biosynthesis;Coproporphyrinogen III oxidase, aerobic (EC 1.3.3.3)	0.998579	0.999985	0.00025825	0
Clustering-based subsystems;CBSS-56780.10.peg.1536;Magnesium and cobalt efflux protein CorC	0.15268	0.324149	0.0567718	0.0565139
Carbohydrates;Central carbohydrate metabolism;Dehydrogenase_complexes;Dihydrolipoamide dehydrogenase of 2-oxoglutarate dehydrogenase (EC 1.8.1.4)	0.283032	0.492269	0.00250459	0.00224672
Nucleosides and Nucleotides;Detoxification;Nudix_proteins_(nucleoside_triphosphate_hydrolases);Adenosine (5')-pentaphospho-(5'')-adenosine pyrophosphohydrolase (EC 3.6.1.-)	0.116634	0.267218	0.000572767	0.000315089
Carbohydrates;Central carbohydrate metabolism;Pyruvate:ferredoxin_oxidoreductase	0.973376	0.999985	0.00119603	0.000939558
Carbohydrates;Central carbohydrate metabolism;Pyruvate:ferredoxin_oxidoreductase;Pyruvate:ferredoxin oxidoreductase, gamma subunit (EC 1.2.7.1)	0.973376	0.999985	0.00119603	0.000939558
Protein Metabolism;Protein degradation;Proteasome_bacterial;ATP-dependent protease HslV (EC 3.4.25.-)	0.999923	0.999985	0.000308746	5.25148e-05
Carbohydrates;Central carbohydrate metabolism;Glycolysis_and_Gluconeogenesis;6-phosphofructokinase class II (EC 2.7.1.11)	0.994745	0.999985	0.000255365	0
RNA Metabolism;RNA processing and modification;tRNA_modification_Bacteria;tRNA 5-methylaminomethyl-2-thiouridine synthase TusD	0.995191	0.999985	0.000253922	0
Virulence;Siderophore_Enterobactin;Ferric enterobactin transport ATP-binding protein FepC (TC 3.A.1.14.2)	0.995654	0.999985	0.000253922	0
RNA Metabolism;RNA processing and modification;Queuosine-Archaeosine_Biosynthesis;Substrate-specific component STY3230 of queuosine-regulated ECF transporter	0.308423	0.519299	0.00104599	0.00079343
Cell Wall and Capsule;Gram-Negative cell wall components;KDO2-Lipid_A_biosynthesis;LPS-assembly lipoprotein RlpB precursor (Rare lipoprotein B)	0.0596279	0.165829	0.000409738	0.000157544
Cofactors, Vitamins, Prosthetic Groups, Pigments;Quinone cofactors;Menaquinone_Biosynthesis_via_Futalosine_--_gjo;3-polyprenyl-4-hydroxybenzoate carboxy-lyase UbiX (EC 4.1.1.-)	0.984739	0.999985	0.00109071	0.000839095
Membrane Transport;Transport_of_Manganese;Manganese ABC transporter, inner membrane permease protein SitC	0.998558	0.999985	0.000251037	0
Carbohydrates;Central carbohydrate metabolism;Pyruvate_metabolism_I:_anaplerotic_reactions,_PEP;Pyruvate carboxyl transferase subunit A (EC 6.4.1.1)	0.312149	0.523284	0.000383769	0.00013357
Clustering-based subsystems;CBSS-393124.3.peg.2657;Methylated-DNA--protein-cysteine methyltransferase (EC 2.1.1.63)	0.0208928	0.0733727	0.0115174	0.0112678
Membrane Transport;Potassium_homeostasis;Potassium-transporting ATPase C chain (EC 3.6.3.12) (TC 3.A.3.7.1)	0.576315	0.788006	0.00588493	0.00563621
Carbohydrates;Central carbohydrate metabolism;Glycolysis_and_Gluconeogenesis;Polyphosphate glucokinase (EC 2.7.1.63)	0.994931	0.999985	0.000248151	0
Stress Response;Universal_stress_protein_family;Universal stress protein A	0.0623214	0.170962	0.00025825	1.14163e-05
Virulence;Iron Scavenging Mechanisms;Siderophore_assembly_kit;Hemin transport protein HmuS	0.999947	0.999985	0.000245266	0
Clustering-based subsystems;Cytochrome biogenesis;CBSS-196164.1.peg.461;HemX protein, negative effector of steady-state concentration of glutamyl-tRNA reductase	0.127042	0.283634	0.000578538	0.000333355
Membrane Transport;Transport_of_Manganese;Manganese ABC transporter, periplasmic-binding protein SitA	0.0705627	0.185643	0.000252479	9.133e-06
Stress Response;Oxidative stress;NADPH:quinone_oxidoreductase_2	0.398829	0.611104	0.000486203	0.000244308
Stress Response;Oxidative stress;NADPH:quinone_oxidoreductase_2;NADPH:quinone oxidoreductase 2	0.398829	0.611104	0.000486203	0.000244308
Virulence;Iron Scavenging Mechanisms;Siderophore_assembly_kit;2,3-dihydro-2,3-dihydroxybenzoate dehydrogenase (EC 1.3.1.28) of siderophore biosynthesis	0.995625	0.999985	0.000240937	0
Membrane Transport;ECF_class_transporters;ATPase component CbiO of energizing module of cobalt ECF transporter	0.570898	0.783847	0.000871414	0.000632461
Carbohydrates;Organic acids;Glycerate_metabolism;2-dehydro-3-deoxyglucarate aldolase (EC 4.1.2.20)	0.0498555	0.145816	0.00027412	3.53904e-05
Motility and Chemotaxis;Flagellar motility in Prokaryota;Flagellum;Flagellar hook-basal body complex protein FliE	0.904576	0.999985	0.00089017	0.000651868
Membrane Transport;General transport systems;General_Secretion_Pathway;General secretion pathway protein I	0.994484	0.999985	0.000238052	0
Plant-Prokaryote DOE project;At1g69340_At2g40600;Probable NADH-dependent flavin oxidoreductase in cluster with COG2110	0.995734	0.999985	0.000238052	0
Protein Metabolism;Protein folding;Periplasmic_disulfide_interchange;Thiol:disulfide interchange protein DsbG precursor	0.994437	0.999985	0.000238052	0
Virulence;Iron Scavenging Mechanisms;Hemin_transport_system;Hemin-binding lipoprotein HbpA	0.887787	0.999985	0.000339044	0.000103888
Regulation and Cell signaling;Orphan_regulatory_proteins;Transcriptional regulatory protein basR/pmrA	0.25277	0.461752	0.000916139	0.00068155
Metabolism of Aromatic Compounds;Metabolism of central aromatic intermediates;Homogentisate_pathway_of_aromatic_compound_degradation;4-hydroxyphenylpyruvate dioxygenase (EC 1.13.11.27)	0.224056	0.424189	0.00060595	0.00037217
Nucleosides and Nucleotides;Purines;Xanthosine_utilization_(xap_region)	0.995933	0.999985	0.000233724	0
Nucleosides and Nucleotides;Purines;Xanthosine_utilization_(xap_region);Xanthosine phosphorylase (EC 2.4.2.1)	0.995933	0.999985	0.000233724	0
Virulence;Type III, Type IV, Type VI, ESAT secretion systems;Type_III_secretion_system;Type III secretion outermembrane pore forming protein (YscC,MxiD,HrcC, InvG)	0.999946	0.999985	0.000233724	0
Clustering-based subsystems;Glutaredoxin_3_containing_cluster	0.062445	0.170962	0.000473218	0.000239741
Clustering-based subsystems;Glutaredoxin_3_containing_cluster;FIG136845: Rhodanese-related sulfurtransferase	0.062445	0.170962	0.000473218	0.000239741
Virulence;Quorum sensing and biofilm formation;Autoinducer_2_(AI-2)_transport_and_processing_(lsrACDBFGE_operon)	0.622419	0.832563	0.00116573	0.00093385
Virulence;Quorum sensing and biofilm formation;Autoinducer_2_(AI-2)_transport_and_processing_(lsrACDBFGE_operon);Autoinducer 2 (AI-2) aldolase LsrF (EC 4.2.1.-)	0.622419	0.832563	0.00116573	0.00093385
Respiration;Formate_hydrogenase;Formate hydrogenlyase subunit 2	0.994678	0.999985	0.000230838	0
Stress Response;Oxidative stress;Glutathione:_Biosynthesis_and_gamma-glutamyl_cycle;Glutathione biosynthesis bifunctional protein gshF (EC 6.3.2.2)(EC 6.3.2.3)	0.988365	0.999985	0.000321731	9.133e-05
Stress Response;Oxidative stress;Glutathione:_Non-redox_reactions;Glutathione S-transferase family protein	0.0820732	0.207419	0.000458791	0.000229467
RNA Metabolism;RNA processing and modification;tRNA_modification_Bacteria;Chaperone protein HscA	0.101203	0.242245	0.0015192	0.00129004
Metabolism of Aromatic Compounds;Salicylate_and_gentisate_catabolism;regulator protein,SalR	0.236615	0.440463	0.00108061	0.000852794
Carbohydrates;Polysaccharides;Glycogen_metabolism;1,4-alpha-glucan (glycogen) branching enzyme, GH-13-type (EC 2.4.1.18)	0.127375	0.284047	0.0592518	0.0590243
Clustering-based subsystems;Membrane-bound hydrogenase;CBSS-69014.3.peg.2094;NADH-ubiquinone oxidoreductase chain H (EC 1.6.5.3)	0.500026	0.710315	0.0111928	0.0109653
Cell Wall and Capsule;Capsular and extracellular polysacchrides;Alginate_metabolism;Pectin degradation protein KdgF	0.329405	0.542532	0.00358376	0.00335638
Cofactors, Vitamins, Prosthetic Groups, Pigments;Riboflavin, FMN, FAD;Riboflavin,_FMN_and_FAD_metabolism;Pyrimidine deaminase eukaryotic (EC 3.5.4.26)	0.986633	0.999985	0.00054247	0.000315089
Carbohydrates;Uncharacterized_sugar_kinase_cluster_(ygc);Putative electron transfer flavoprotein subunit YgcQ	0.998528	0.999985	0.000225067	0
Plant-Prokaryote DOE project;Experimental-Ubiquinone_BiosynthesisVDC;Chorismate--pyruvate lyase (EC 4.1.3.40)	0.994389	0.999985	0.000225067	0
Virulence;Iron Scavenging Mechanisms;Transport_of_Iron;Iron-uptake factor PiuC	0.998479	0.999985	0.000225067	0
Fatty Acids, Lipids, and Isoprenoids;Fatty acids;Fatty_Acid_Biosynthesis_FASII;3-hydroxydecanoyl-[acyl-carrier-protein] dehydratase (EC 4.2.1.60)	0.998468	0.999985	0.000223625	0
RNA Metabolism;RNA processing and modification;RNA_methylation;RNA methyltransferase, TrmH family, group 1	0.994846	0.999985	0.000223625	0
Cell Division and Cell Cycle;Intracellular_septation_in_Enterobacteria	0.087248	0.216796	0.00051073	0.000288831
Regulation and Cell signaling;cAMP_signaling_in_bacteria;ElaA protein	0.445122	0.652179	0.00108638	0.000865352
Amino Acids and Derivatives;Glutamine, glutamate, aspartate, asparagine; ammonia assimilation;Glutamine,_Glutamate,_Aspartate_and_Asparagine_Biosynthesis;Aspartate aminotransferase (EC 2.6.1.1)	0.0242009	0.0825792	0.150999	0.150778
Membrane Transport;Transport_of_Zinc;Candidate zinc-binding lipoprotein ZinT	0.994682	0.999985	0.000219296	0
Amino Acids and Derivatives;Aromatic amino acids and derivatives;Aromatic_amino_acid_degradation;Homoprotocatechuate degradative operon repressor	0.381014	0.593494	0.000754552	0.000537706
Protein Metabolism;Protein biosynthesis;Pyrrolysine	0.433452	0.640982	0.000233724	1.71244e-05
Protein Metabolism;Protein biosynthesis;Pyrrolysine;pyrrolysine-containing	0.433452	0.640982	0.000233724	1.71244e-05
Respiration;Biogenesis_of_c-type_cytochromes;ABC transporter involved in cytochrome c biogenesis, ATPase component CcmA	0.168524	0.346315	0.000380883	0.000166677
Stress Response;Oxidative stress;Glutaredoxins;Glutaredoxin 3 (Grx3)	0.994788	0.999985	0.000213525	0
Amino Acids and Derivatives;Proline and 4-hydroxyproline;Proline,_4-hydroxyproline_uptake_and_utilization;ProQ: influences osmotic activation of compatible solute ProP	0.998421	0.999985	0.00021064	0
Stress Response;Oxidative stress;Oxidative_stress;NnrS protein involved in response to NO	0	1e-15	0.000225067	1.48411e-05
Virulence;Resistance to antibiotics and toxic compounds;Methicillin_resistance_in_Staphylococci;FemA, factor essential for methicillin resistance	0.372147	0.585368	0.000350586	0.00014042
Cell Wall and Capsule;Capsular and extracellular polysacchrides;Capsular_Polysaccharides_Biosynthesis_and_Assembly	0.539629	0.751458	0.00733344	0.00712374
Protein Metabolism;Protein folding;Protein_chaperones;DnaJ-class molecular chaperone CbpA	0.940894	0.999985	0.000424165	0.000214626
Nucleosides and Nucleotides;Purine_Utilization;Xanthine dehydrogenase, iron-sulfur cluster and FAD-binding subunit A (1.17.1.4)	0.937318	0.999985	0.000238052	2.96823e-05
Respiration;Electron donating reactions;Succinate_dehydrogenase;Fumarate reductase subunit D	0.994566	0.999985	0.000207754	0
Protein Metabolism;Protein degradation;Protein_degradation	0.340863	0.552878	0.00731036	0.00710319
RNA Metabolism;Transcription;Transcription_initiation,_bacterial_sigma_factors;RNA polymerase sporulation specific sigma factor SigH	0.148596	0.318102	0.00355491	0.00334953
Virulence;Ton_and_Tol_transport_systems;MotA/TolQ/ExbB proton channel family protein	0.606173	0.818365	0.0101006	0.00989561
Amino Acids and Derivatives;Proline and 4-hydroxyproline;Proline,_4-hydroxyproline_uptake_and_utilization;1-pyrroline-4-hydroxy-2-carboxylate deaminase (EC 3.5.4.22)	0.0360787	0.112808	0.000265464	6.05062e-05
Virulence;Resistance to antibiotics and toxic compounds;Beta-lactamase;Beta-lactamase class A	0.99546	0.999985	0.000203426	0
Virulence;Type III, Type IV, Type VI, ESAT secretion systems;Type_III_secretion_system;Type III secretion inner membrane protein (YscT,HrcT,SpaR,EscT,EpaR1,homologous to flagellar export components)	0.998546	0.999985	0.000203426	0
DNA Metabolism;DNA replication;DNA-replication;DNA polymerase III psi subunit (EC 2.7.7.7)	0.994635	0.999985	0.000201983	0
Membrane Transport;ECF_class_transporters;Additional substrate-specific component CbiN of cobalt ECF transporter	0.737267	0.94688	0.000261136	6.05062e-05
Respiration;Electron accepting reactions;Terminal_cytochrome_oxidases;Cytochrome O ubiquinol oxidase subunit III (EC 1.10.3.-)	0.996091	0.999985	0.000200541	0
Respiration;Electron donating reactions;Coenzyme_F420_hydrogenase	0.998387	0.999985	0.000200541	0
Respiration;Electron donating reactions;Coenzyme_F420_hydrogenase;Coenzyme F420 hydrogenase maturation protease (EC 3.4.24.-)	0.998387	0.999985	0.000200541	0
Amino Acids and Derivatives;Glutamine, glutamate, aspartate, asparagine; ammonia assimilation	0.0107554	0.0445615	0.553264	0.553064
Amino Acids and Derivatives;Aromatic amino acids and derivatives;Aromatic_amino_acid_degradation;5-carboxymethyl-2-hydroxymuconate semialdehyde dehydrogenase (EC 1.2.1.60)	0.997959	0.999985	0.000199098	0
Clustering-based subsystems;TldD cluster	0.998403	0.999985	0.000199098	0
Clustering-based subsystems;TldD cluster;CBSS-354.1.peg.2917	0.998403	0.999985	0.000199098	0
Clustering-based subsystems;TldD cluster;CBSS-354.1.peg.2917;FIG003879: Predicted amidohydrolase	0.998403	0.999985	0.000199098	0
Membrane Transport;Transport_of_Manganese;Manganese ABC transporter, ATP-binding protein SitB	0.649484	0.857586	0.000213525	1.48411e-05
Phages, Prophages, Transposable elements;Phage family-specific subsystems;r1t-like_streptococcal_phages;HNH homing endonuclease	0.995992	0.999985	0.00597294	0.00577434
Carbohydrates;Sugar alcohols;Glycerol_and_Glycerol-3-phosphate_Uptake_and_Utilization;Glycerol uptake facilitator protein	0.942149	0.999985	0.00148169	0.00128319
Respiration;Electron donating reactions;Coenzyme_F420-H2_dehydrogenase_(methanophenazine);Coenzyme F(420)H(2) dehydrogenase (methanophenazine) subunit FpoK	0.556653	0.769873	0.00253345	0.00233577
RNA Metabolism;Transcription;Transcription_factors_cyanobacterial_RpoD-like_sigma_factors;Cyanobacteria-specific RpoD-like sigma factor, type-7	0.997797	0.999985	0.000197655	0
DNA Metabolism;DNA replication;DNA-replication;DNA polymerase III chi subunit (EC 2.7.7.7)	0.0583413	0.163313	0.000326059	0.000129004
Plant-Prokaryote DOE project;At5g37530;Cysteine desulfurase CsdA-CsdE, sulfur acceptor protein CsdE	0.994777	0.999985	0.000196213	0
Nucleosides and Nucleotides;Ribonucleotide_reduction;Ribonucleotide reduction protein NrdI	0.959961	0.999985	0.000229395	3.42488e-05
Cofactors, Vitamins, Prosthetic Groups, Pigments;Tetrapyrroles;Coenzyme_B12_biosynthesis;Cob(II)alamin reductase	0.259192	0.468246	0.00236753	0.00217251
Respiration;Electron donating reactions;Formate_dehydrogenase;Formate dehydrogenase N gamma subunit (EC 1.2.1.2)	0.994571	0.999985	0.00019477	0
Virulence;Iron Scavenging Mechanisms;Transport_of_Iron;Ferrous iron transport protein A	0.703538	0.912986	0.000538142	0.000343629
Clustering-based subsystems;Shiga toxin cluster;CBSS-194948.1.peg.143;putative DNA N-6-adenine methyltransferase	0.230465	0.432197	0.000264021	6.96392e-05
RNA Metabolism;RNA processing and modification;tRNA_modification_Bacteria;LSU m3Psi1915 methyltransferase RlmH	0.294715	0.502734	0.00669575	0.00650156
Stress Response;Oxidative stress;Oxidative_stress;Organic hydroperoxide resistance protein	0.227461	0.428325	0.000239495	4.5665e-05
Nitrogen Metabolism;Allantoin_Utilization;Ureidoglycolate hydrolase (EC 3.5.3.19)	0.237002	0.440761	0.000225067	3.19655e-05
Amino Acids and Derivatives;Glutamine, glutamate, aspartate, asparagine; ammonia assimilation;Glutamate_and_Aspartate_uptake_in_Bacteria;Glutamate Aspartate periplasmic binding protein precursor GltI (TC 3.A.1.3.4)	0.0639245	0.173638	0.000766094	0.000574238
Carbohydrates;Monosaccharides;L-fucose_utilization_temp;L-fuconate dehydratase (EC 4.2.1.68)	0.116554	0.267193	0.000217854	2.7399e-05
Amino Acids and Derivatives;Aromatic amino acids and derivatives;Tryptophan_synthesis;Anthranilate synthase, amidotransferase component (EC 4.1.3.27)	0.279309	0.490284	0.0019073	0.001717
Virulence;Iron Scavenging Mechanisms;Iron(III)_dicitrate_transport_system_Fec;Iron(III) dicitrate transport system permease protein FecC (TC 3.A.1.14.1)	0.998403	0.999985	0.000188999	0
DNA Metabolism;DNA repair;Uracil-DNA_glycosylase;Uracil-DNA glycosylase, family 1	0.167767	0.345129	0.0130121	0.0128239
Plant-Prokaryote DOE project;Iron-sulfur_cluster_assembly;Folate-dependent protein for Fe/S cluster synthesis/repair in oxidative stress	0.279081	0.490284	0.00022651	3.88153e-05
Cell Wall and Capsule;Murein_Hydrolases;Membrane-bound lytic murein transglycosylase E (EC 3.2.1.-)	0.966981	0.999985	0.000275563	8.79052e-05
RNA Metabolism;RNA processing and modification;tRNA_modification_Bacteria;tRNA 5-methylaminomethyl-2-thiouridine synthase TusC	0.99639	0.999985	0.000187556	0
Stress Response;Universal_stress_protein_family;Universal stress protein D	0.996332	0.999985	0.000187556	0
Clustering-based subsystems;Hypothetical lipase related to Phosphatidate metabolism;CBSS-316407.3.peg.1371;Putative lipase in cluster with Phosphatidate cytidylyltransferase	0.998349	0.999985	0.000186113	0
Stress Response;Oxidative stress;Oxidative_stress;Fumarate and nitrate reduction regulatory protein	0.998347	0.999985	0.000186113	0
RNA Metabolism;RNA processing and modification;tRNA_modification_Bacteria;Ferredoxin, 2Fe-2S	0.016279	0.0610701	0.000302975	0.000117587
Virulence;Regulation of virulence;Streptococcus_pyogenes_virulence_regulators;Multiple sugar metabolism regulator	0.175106	0.357172	0.000721369	0.000536564
Protein Metabolism;Protein biosynthesis;Translation_elongation_factors_bacterial;Translation elongation factor P-related protein	0.996237	0.999985	0.000184671	0
RNA Metabolism;Transcription;Transcription_factors_cyanobacterial_RpoD-like_sigma_factors	0.430306	0.638461	0.000197655	1.36995e-05
Carbohydrates;One-carbon Metabolism;Serine-glyoxylate_cycle;Propionyl-CoA carboxylase carboxyl transferase subunit (EC 6.4.1.3)	0.283371	0.492636	0.000216411	3.31071e-05
Cofactors, Vitamins, Prosthetic Groups, Pigments;Quinone cofactors;Menaquinone_Biosynthesis_via_Futalosine_--_gjo;Menaquinone via futalosine step 1	0.983235	0.999985	0.000584309	0.000401852
Cofactors, Vitamins, Prosthetic Groups, Pigments;Quinone cofactors;Tocopherol_Biosynthesis;2-methyl-6-phytyl-1,4-benzoquinone methyltransferase	0.0102208	0.0427607	0.000199098	1.71244e-05
Clustering-based subsystems;Conjugative_transfer_related_cluster;IncF plasmid conjugative transfer protein TrbC	0.181554	0.367402	0.000203426	2.16909e-05
Cofactors, Vitamins, Prosthetic Groups, Pigments;NAD and NADP;NAD_and_NADP_cofactor_biosynthesis_global;Ribosylnicotinamide kinase (EC 2.7.1.22)	1.59036e-05	0.000186083	0.000245266	6.3931e-05
DNA Metabolism;DNA replication;DNA_topoisomerases,_Type_I,_ATP-independent	0.409807	0.618368	0.000203426	2.28325e-05
DNA Metabolism;DNA replication;DNA_topoisomerases,_Type_I,_ATP-independent;DNA topoisomerase III (EC 5.99.1.2) in PFGI-1-like cluster	0.409807	0.618368	0.000203426	2.28325e-05
Metabolism of Aromatic Compounds;Peripheral pathways for catabolism of aromatic compounds;Benzoate_catabolism	0.999935	0.999985	0.0001789	0
Metabolism of Aromatic Compounds;Peripheral pathways for catabolism of aromatic compounds;Benzoate_catabolism;Benzoate 1,2-dioxygenase (EC 1.14.12.10)	0.999935	0.999985	0.0001789	0
Carbohydrates;Monosaccharides;L-ascorbate_utilization_(and_related_gene_clusters);L-ribulose-5-phosphate 4-epimerase UlaF (EC 5.1.3.4) (L-ascorbate utilization protein F)	0.230154	0.431917	0.000264021	8.56219e-05
Miscellaneous;Luciferases;LuxC, acyl-CoA reductase (EC 1.2.1.50)	0.374687	0.587741	0.000483318	0.000305956
Carbohydrates;Monosaccharides;D-ribose_utilization;Ribose ABC transport system, high affinity permease RbsD (TC 3.A.1.2.1)	0.157181	0.330917	0.000930567	0.000754614
RNA Metabolism;RNA processing and modification;tRNA_modification_Bacteria;Iron-sulfur cluster assembly ATPase protein SufC	0.51375	0.724596	0.00868096	0.00850511
Carbohydrates;Monosaccharides;D-allose_utilization;D-allose ABC transporter, permease component	0.373096	0.586606	0.000255365	7.99138e-05
Respiration;Electron donating reactions;Succinate_dehydrogenase;Fumarate reductase subunit C	0.0294915	0.0967712	0.000183228	7.99138e-06
Carbohydrates;Sugar alcohols;Glycerol_and_Glycerol-3-phosphate_Uptake_and_Utilization;Thiosulfate sulfurtransferase GlpE (EC 2.8.1.1)	0.186508	0.374476	0.00042128	0.000247733
Clustering-based subsystems;Predicted_secretion_system_W_clustering_with_cell_division_proteins;FIG073201: glycosyl transferase	0.559551	0.773018	0.00678232	0.00660887
Cell Wall and Capsule;Capsular and extracellular polysacchrides;Capsular_Polysaccharide_(CPS)_of_Campylobacter;Capsular polysaccharide export system protein KpsF	0.935412	0.999985	0.000203426	3.08239e-05
Membrane Transport;Uni- Sym- and Antiporters;Sodium_Hydrogen_Antiporter;Na(+) H(+) antiporter subunit A	0.371031	0.584375	0.000245266	7.3064e-05
Secondary Metabolism;Aromatic amino acids and derivatives;Cinnamic_Acid_Degradation;3-(3-hydroxy-phenyl)propionate hydroxylase (EC 1.14.13.-)	0.998304	0.999985	0.000171686	0
Protein Metabolism;Protein folding;Periplasmic_disulfide_interchange;Periplasmic thiol:disulfide interchange protein, DsbA-like	0.237588	0.441137	0.000320288	0.000149553
Carbohydrates;Sugar alcohols;Propanediol_utilization;Propanediol dehydratase small subunit (EC 4.2.1.28)	0.77315	0.983429	0.000216411	4.68066e-05
Membrane Transport;ECF_class_transporters;Transmembrane component YkoC of energizing module of thiamin-regulated ECF transporter for HydroxyMethylPyrimidine	0.362605	0.576356	0.000887284	0.000718082
Clustering-based subsystems;Lysine Biosynthesis	0.0536703	0.153918	0.000222182	5.36564e-05
Clustering-based subsystems;Lysine Biosynthesis;A_Glutathione-dependent_Thiol_Reductase_Associated_with_a_Step_in_Lysine_Biosynthesis	0.0536703	0.153918	0.000222182	5.36564e-05
Clustering-based subsystems;Lysine Biosynthesis;A_Glutathione-dependent_Thiol_Reductase_Associated_with_a_Step_in_Lysine_Biosynthesis;FIG138056: a glutathione-dependent thiol reductase	0.0536703	0.153918	0.000222182	5.36564e-05
Amino Acids and Derivatives;Arginine; urea cycle, polyamines;Putrescine_utilization_pathways;Gamma-glutamyl-putrescine synthetase (EC 6.3.1.11)	0.998252	0.999985	0.000167358	0
Fatty Acids, Lipids, and Isoprenoids;Isoprenoids;Acyclic_terpenes_utilization	0.624024	0.833114	0.00146294	0.00129574
Amino Acids and Derivatives;Branched-chain amino acids;Leucine_Degradation_and_HMG-CoA_Metabolism;Hydroxymethylglutaryl-CoA reductase (EC 1.1.1.34)	0.618358	0.829038	0.000256808	9.01884e-05
Respiration;Electron donating reactions;Coenzyme_F420-H2_dehydrogenase_(methanophenazine);Coenzyme F(420)H(2) dehydrogenase (methanophenazine) subunit FpoF	0.339993	0.5525	0.000272678	0.000106171
Nucleosides and Nucleotides;Pseudouridine_catabolism;Probable pyrimidine nucleoside transport protein associated with pseudouridine catabolism	0.99823	0.999985	0.000165915	0
Stress Response;Universal_stress_protein_family;Universal stress protein C	0.996295	0.999985	0.000165915	0
Virulence;Quorum sensing and biofilm formation;Quorum_sensing_in_Yersinia	0.99823	0.999985	0.000165915	0
Virulence;Quorum sensing and biofilm formation;Quorum_sensing_in_Yersinia;N-butyryl-L-homoserine lactone quorum-sensing transcriptional activator	0.99823	0.999985	0.000165915	0
Respiration;Electron donating reactions;Coenzyme_F420-H2_dehydrogenase_(methanophenazine);Coenzyme F(420)H(2) dehydrogenase (methanophenazine) subunit FpoD	0.414376	0.62302	0.000176014	1.02746e-05
Carbohydrates;Uncharacterized_sugar_kinase_cluster_(ygc);Ferredoxin-like protein YgcO	0.238491	0.442174	0.000196213	3.08239e-05
Carbohydrates;Central carbohydrate metabolism;Pyruvate_metabolism_I:_anaplerotic_reactions,_PEP;Two-component response regulator, malate (EC 2.7.3.-)	0.21561	0.413289	0.000320288	0.000155261
Stress Response;Oxidative stress;Glutathione_analogs:_mycothiol;Acetyl-CoA:Cys-GlcN-Ins acetyltransferase, mycothiol synthase MshD	0.977796	0.999985	0.000287105	0.000122154
Clustering-based subsystems;Conjugative_transfer_related_cluster;IncF plasmid conjugative transfer pilus assembly protein TraE	0.0462803	0.137554	0.000186113	2.39741e-05
Nucleosides and Nucleotides;Detoxification;Nudix_proteins_(nucleoside_triphosphate_hydrolases);Pyrimidine deoxynucleoside triphosphate (dYTP) pyrophosphohydrolase YfoO	0.0348301	0.109796	0.000177457	1.59828e-05
Plant-Prokaryote DOE project;Iron-sulfur_cluster_assembly;Frataxin homolog CyaY, facilitates iron supply for heme A synthesis or Fe-S cluster assembly	0.0439141	0.131948	0.000255365	9.47549e-05
Carbohydrates;Uncharacterized_sugar_kinase_cluster_(ygc);Putative electron transfer flavoprotein subunit YgcR	0.998271	0.999985	0.000160144	0
Stress Response;Oxidative stress;Oxidative_stress;Nitrite-sensitive transcriptional repressor NsrR	0.472662	0.679668	0.000907483	0.000747765
Amino Acids and Derivatives;Aromatic amino acids and derivatives;Common_Pathway_For_Synthesis_of_Aromatic_Compounds_(DAHP_synthase_to_chorismate);Shikimate kinase III (EC 2.7.1.71)	0.0520103	0.150178	0.0001688	9.133e-06
Carbohydrates;Sugar alcohols;Inositol_catabolism;Methylmalonate-semialdehyde dehydrogenase [inositol] (EC 1.2.1.27)	0.100632	0.241678	0.000206312	4.68066e-05
Metabolism of Aromatic Compounds;Metabolism of central aromatic intermediates;Central_meta-cleavage_pathway_of_aromatic_compound_degradation;2-hydroxy-6-oxo-6-phenylhexa-2,4-dienoate hydrolase (EC 3.7.1.-)	0.254075	0.463257	0.00325193	0.00309381
Metabolism of Aromatic Compounds;Salicylate_and_gentisate_catabolism;Putative n-hydroxybenzoate hydroxylase	0.999955	0.999985	0.000157259	0
Carbohydrates;Central carbohydrate metabolism;Peripheral_Glucose_Catabolism_Pathways;Glucose ABC transport system, inner membrane component 2	0.996894	0.999985	0.000307303	0.000150695
Nitrogen Metabolism;Denitrification;Nitrous oxide reductase maturation protein, outer-membrane lipoprotein NosL	0.204491	0.398928	0.000176014	1.94076e-05
Plasmids;Plasmid transfer;Plasmid-encoded_T-DNA_transfer;Inner membrane protein forms channel for type IV secretion of T-DNA complex, VirB8	0.99826	0.999985	0.000155816	0
Carbohydrates;Monosaccharides;D-allose_utilization;D-allose ABC transporter, substrate-binding component	0.932005	0.999985	0.000264021	0.000108454
Virulence;Type III, Type IV, Type VI, ESAT secretion systems;Type_III_secretion_system;Type III secretion cytoplasmic protein (YscL)	0.999954	0.999985	0.000154373	0
Protein Metabolism;Secretion;HtrA_and_Sec_secretion;Protein export cytoplasm chaperone protein (SecB, maintains protein to be exported in unfolded state)	0.196441	0.389176	0.000398196	0.000244308
Phages, Prophages, Transposable elements;Listeria_phi-A118-like_prophages;Scaffolding protein [Bacteriophage A118]	0.9229	0.999985	0.00073724	0.000583371
Carbohydrates;Central carbohydrate metabolism;Ethylmalonyl-CoA_pathway_of_C2_assimilation	0.120288	0.273959	0.000171686	1.8266e-05
Protein Metabolism;Protein biosynthesis;Ribosome_biogenesis_bacterial;Ribosomal protein S6 glutaminyl transferase	0.871266	0.999985	0.00054247	0.000389294
Cell Wall and Capsule;Gram-Negative cell wall components;Lipid_A-Ara4N_pathway_(_Polymyxin_resistance_);Polymyxin resistance protein PmrM	0.996245	0.999985	0.00015293	0
Stress Response;Oxidative stress;Glutathione_analogs:_mycothiol;Formaldehyde dehydrogenase MscR, NAD/mycothiol-dependent (EC 1.2.1.66)	0.369593	0.583496	0.000239495	8.67635e-05
Cell Wall and Capsule;Gram-Negative cell wall components;LOS_core_oligosaccharide_biosynthesis;ADP-L-glycero-D-manno-heptose-6-epimerase (EC 5.1.3.20)	0.350686	0.563352	0.00089017	0.00073749
Virulence;Regulation of virulence;Streptococcus_pyogenes_virulence_regulators	0.157563	0.331037	0.000802163	0.000649585
Respiration;Biogenesis_of_c-type_cytochromes;Cytochrome c-type biogenesis protein CcmE, heme chaperone	0.0698412	0.184792	0.000320288	0.000167819
Clustering-based subsystems;CBSS-316273.3.peg.922	0.0602373	0.167162	0.000264021	0.000111879
Clustering-based subsystems;CBSS-316273.3.peg.922;probable iron binding protein from the HesB_IscA_SufA family	0.0602373	0.167162	0.000264021	0.000111879
Virulence;Bacterial_cyanide_production_and_tolerance_mechanisms	0.998302	0.999985	0.000151488	0
Virulence;Bacterial_cyanide_production_and_tolerance_mechanisms;Hydrogen cyanide synthase HcnC	0.998302	0.999985	0.000151488	0
DNA Metabolism;DNA replication;DNA-replication;Primosomal replication protein N prime prime	0.0701683	0.184985	0.000161587	1.02746e-05
Carbohydrates;Monosaccharides;L-Arabinose_utilization;L-arabinose transport ATP-binding protein AraG (TC 3.A.1.2.2)	0.318786	0.529796	0.00489089	0.00474003
Carbohydrates;Monosaccharides;L-ascorbate_utilization_(and_related_gene_clusters);Ascorbate-specific PTS system, EIIB component (EC 2.7.1.69)	0.810998	0.999985	0.000256808	0.000106171
Cofactors, Vitamins, Prosthetic Groups, Pigments;Quinone cofactors;Menaquinone_Biosynthesis_via_Futalosine_--_gjo;Menaquinone via futalosine step 2	0.610748	0.82166	0.000398196	0.000247733
Clustering-based subsystems;Nucleotidyl-phosphate metabolic cluster;CBSS-222523.1.peg.1311;Adenylate cyclase	0.348049	0.560518	0.000259693	0.000109596
Stress Response;Osmotic stress;Choline_and_Betaine_Uptake_and_Betaine_Biosynthesis;Choline ABC transport system, choline-binding protein OpuBC	0.364428	0.577236	0.000251037	0.000101605
Stress Response;Hfl_operon;RNA-binding protein Hfq	0.336322	0.548286	0.000377998	0.000229467
Clustering-based subsystems;Ribosomal Protein L28P relates to a set of uncharacterized proteins;A_Gram-positive_cluster_that_relates_ribosomal_protein_L28P_to_a_set_of_uncharacterized_proteins;LSU ribosomal protein L28p	0.959234	0.999985	0.0024743	0.00232663
Clustering-based subsystems;Probably GTP or GMP signaling related;CBSS-176299.4.peg.1292;DNA-directed RNA polymerase omega subunit (EC 2.7.7.6)	0.162399	0.337331	0.00127971	0.00113249
Carbohydrates;Central carbohydrate metabolism;Dehydrogenase_complexes;Pyruvate dehydrogenase E1 component beta subunit (EC 1.2.4.1)	0.572535	0.784726	0.000227953	8.10554e-05
Virulence;Iron Scavenging Mechanisms;Heme,_hemin_uptake_and_utilization_systems_in_GramPositives;Iron compound ABC uptake transporter substrate-binding protein	0.379737	0.592726	0.00141388	0.0012672
Amino Acids and Derivatives;Aromatic amino acids and derivatives;Common_Pathway_For_Synthesis_of_Aromatic_Compounds_(DAHP_synthase_to_chorismate);Shikimate 5-dehydrogenase I gamma (EC 1.1.1.25)	0.397574	0.610396	0.000157259	1.14163e-05
Stress Response;Oxidative stress;Glutaredoxins;Glutaredoxin 1	0.996884	0.999985	0.000145717	0
Virulence;Type III, Type IV, Type VI, ESAT secretion systems;Type_IV_pilus;Type IV pilus biogenesis protein PilE	0.451287	0.658455	0.000418394	0.000272848
Cofactors, Vitamins, Prosthetic Groups, Pigments;Coenzyme B;Coenzyme_B_synthesis;Coenzyme B synthesis from 2-oxoglutarate: steps 4, 7, 8, 11, and 12 [large subunit]	0.848763	0.999985	0.00170099	0.00155604
Phages, Prophages, Transposable elements;Bacteriophage structural proteins;Phage_capsid_proteins;Phage head completion-stabilization protein	0.99871	0.999985	0.000144274	0
Stress Response;Universal_stress_protein_family;Universal stress protein G	0.996286	0.999985	0.000144274	0
RNA Metabolism;RNA processing and modification;tRNA_modification_Bacteria;tRNA-specific adenosine-34 deaminase (EC 3.5.4.-)	1.7254e-05	0.000200636	0.0103646	0.010221
Membrane Transport;Transport_of_Molybdenum;Molybdenum transport system protein ModD	0.133816	0.294655	0.000386654	0.000243166
Stress Response;Oxidative stress;Glutaredoxins;Glutaredoxin-like protein NrdH, required for reduction of Ribonucleotide reductase class Ib	0.00463652	0.0224398	0.000154373	1.14163e-05
Miscellaneous;Luciferases;LuxE, long-chain-fatty-acid ligase (EC 6.2.1.19)	0.202759	0.39674	0.000652118	0.000509165
Carbohydrates;Central carbohydrate metabolism;Peripheral_Glucose_Catabolism_Pathways	0.262209	0.471388	0.000307303	0.000164394
Metabolism of Aromatic Compounds;Aromatic_Amin_Catabolism;Phenylacetaldehyde dehydrogenase (EC 1.2.1.39)	0.998482	0.999985	0.000142831	0
Amino Acids and Derivatives;Branched-chain amino acids;Leucine_Degradation_and_HMG-CoA_Metabolism	0.235218	0.438854	0.000256808	0.000114163
Regulation and Cell signaling;Stringent_Response,_(p)ppGpp_metabolism;Guanosine-3',5'-bis(diphosphate) 3'-pyrophosphohydrolase (EC 3.1.7.2)	0.596259	0.807928	0.0270413	0.0269001
DNA Metabolism;DNA_structural_proteins,_bacterial;DNA-binding protein HBsu	0.159471	0.333407	0.0073724	0.0072322
Clustering-based subsystems;Cell_division-ribosomal_stress_proteins_cluster;Spore cortex biosynthesis protein	0.522561	0.732461	0.000972406	0.000832245
Metabolism of Aromatic Compounds;Salicylate_and_gentisate_catabolism;Maleate cis-trans isomerase (EC 5.2.1.1)	0.00541126	0.0255558	0.000157259	1.71244e-05
Motility and Chemotaxis;Flagellar motility in Prokaryota;Flagellum;Flagellar biosynthesis protein FliL	0.998076	0.999985	0.000139946	0
Respiration;Electron donating reactions;Respiratory_dehydrogenases_1;Glycerol dehydrogenase (EC 1.1.1.6)	0.246532	0.453369	0.00841405	0.0082745
Carbohydrates;Central carbohydrate metabolism;Ethylmalonyl-CoA_pathway_of_C2_assimilation;Acyltransferase family protein associated with ethylmalonyl-CoA pathway	0.018116	0.066156	0.000154373	1.48411e-05
Plant-Prokaryote DOE project;Iron-sulfur_cluster_assembly;Thiamin biosynthesis lipoprotein ApbE	0.000337485	0.00261891	0.0258957	0.0257562
Regulation and Cell signaling;Orphan_regulatory_proteins;DNA transformation protein TfoX	0.488031	0.698042	0.00137926	0.00123981
Carbohydrates;Fermentation;Acetone_Butanol_Ethanol_Synthesis;Acetyl-CoA:acetoacetyl-CoA transferase, alpha subunit (EC 2.8.3.8)	0.520227	0.730066	0.00103733	0.000898459
Amino Acids and Derivatives;Arginine; urea cycle, polyamines;Putrescine_utilization_pathways;Gamma-glutamyl-aminobutyraldehyde dehydrogenase (EC 1.2.1.-)	0.999951	0.999985	0.000138503	0
Virulence;Invasion and intracellular resistance;Salmonella_invasion_locus	0.998393	0.999985	0.000138503	0
Amino Acids and Derivatives;Arginine; urea cycle, polyamines;Arginine_Deiminase_Pathway;Transcriptional regulator ArcR essential for anaerobic expression of the ADI pathway, Crp/Fnr family	0.648818	0.857586	0.000245266	0.000107313
Nucleosides and Nucleotides;Pyrimidines;pyrimidine_conversions;Thymidine kinase (EC 2.7.1.21)	0.00615486	0.0285422	0.0111509	0.0110133
Respiration;Electron accepting reactions;Anaerobic_respiratory_reductases;Coenzyme F420-dependent oxidoreductase	0.0204737	0.0723631	0.0198622	0.019725
Amino Acids and Derivatives;Aromatic amino acids and derivatives;Tryptophan_catabolism;2-keto-4-pentenoate hydratase (EC 4.2.1.-)	0.998109	0.999985	0.00013706	0
Respiration;Electron accepting reactions;Terminal_cytochrome_oxidases;Cytochrome O ubiquinol oxidase subunit IV (EC 1.10.3.-)	0.996358	0.999985	0.00013706	0
Clustering-based subsystems;Shiga toxin cluster;CBSS-194948.1.peg.143;putative endopeptidase	0.99995	0.999985	0.000135617	0
Membrane Transport;ECF_class_transporters;Substrate-specific component YkoE of thiamin-regulated ECF transporter for HydroxyMethylPyrimidine	0.451909	0.658781	0.000383769	0.000248874
Respiration;ATP synthases;F0F1-type_ATP_synthase;ATP synthase protein I	2.48404e-06	3.62161e-05	0.000135617	1.14163e-06
Clustering-based subsystems;Choline bitartrate degradation, putative;CBSS-344610.3.peg.2335;Putative dioxygenase, alpha subunit (EC 1.-.-.-)	0.99817	0.999985	0.000134175	0
Amino Acids and Derivatives;Lysine, threonine, methionine, and cysteine;Lysine_fermentation;L-beta-lysine 5,6-aminomutase beta subunit (EC 5.4.3.3)	0.99839	0.999985	0.000408295	0.000275132
RNA Metabolism;RNA processing and modification;tRNA_modification_Bacteria;Iron binding protein IscA for iron-sulfur cluster assembly	0.996493	0.999985	0.000132732	0
Respiration;Electron donating reactions;Respiratory_Complex_I;NADH ubiquinone oxidoreductase chain A (EC 1.6.5.3)	0.996323	0.999985	0.000132732	0
Virulence;Type III, Type IV, Type VI, ESAT secretion systems;Type_III_secretion_system;Type III secretion chaperone protein for YopD (SycD)	0.99995	0.999985	0.000132732	0
Cell Wall and Capsule;Gram-Negative cell wall components;Major_Outer_Membrane_Proteins;Integral membrane protein YfiB	0.996103	0.999985	0.000131289	0
Respiration;Formate_hydrogenase;Hydrogenase-4 component A (EC 1.-.-.-)	0.998055	0.999985	0.000131289	0
Virulence;Iron Scavenging Mechanisms;Siderophore_assembly_kit;Periplasmic hemin-binding protein	0.217145	0.414992	0.000833903	0.000703241
Cofactors, Vitamins, Prosthetic Groups, Pigments;NAD and NADP;NAD_and_NADP_cofactor_biosynthesis_global;Nicotinamidase/isochorismatase family protein	0.998054	0.999985	0.000129847	0
Respiration;Electron accepting reactions;Anaerobic_respiratory_reductases;F420-dependent sulfite reductase	0.30262	0.511769	0.000375112	0.000245449
Carbohydrates;Fermentation;Acetone_Butanol_Ethanol_Synthesis;Acetyl-CoA:acetoacetyl-CoA transferase, beta subunit (EC 2.8.3.8)	0.475306	0.682886	0.000134175	5.70813e-06
Clustering-based subsystems;Conjugative_transfer_related_cluster;IncF plasmid conjugative transfer pilus assembly protein TraK	0.999948	0.999985	0.000128404	0
Clustering-based subsystems;Conserved_cluster_around_acetyltransferase_YpeA_in_Enterobacteria;Inner membrane protein YfeZ	0.996184	0.999985	0.000128404	0
Clustering-based subsystems;CBSS-211586.1.peg.3133;Cell division protein FtsB	0.0622097	0.17091	0.000248151	0.000119871
Clustering-based subsystems;CBSS-211586.1.peg.3133;2-C-methyl-D-erythritol 2,4-cyclodiphosphate synthase (EC 4.6.1.12)	0.121954	0.276119	0.00771433	0.0075861
Virulence;Type III, Type IV, Type VI, ESAT secretion systems;Type_III_secretion_system;Type III secretion inner membrane protein (YscR,SpaR,HrcR,EscR,homologous to flagellar export components)	0.42341	0.631424	0.000132732	4.5665e-06
Plant-Prokaryote DOE project;Iron-sulfur_cluster_assembly;FIG001341: Probable Fe(2+)-trafficking protein YggX	0.0300445	0.0978352	0.000197655	6.96392e-05
Carbohydrates;Organic acids;Glycerate_metabolism;Tartrate decarboxylase (EC 4.1.1.73)	0.794964	0.999985	0.00016303	3.53904e-05
Carbohydrates;Central carbohydrate metabolism;Pyruvate_Alanine_Serine_Interconversions;Omega-amino acid--pyruvate aminotransferase (EC 2.6.1.18)	0.824484	0.999985	0.000474661	0.000347054
Clustering-based subsystems;Conserved_cluster_around_acetyltransferase_YpeA_in_Enterobacteria	0.21087	0.407449	0.00179188	0.00166449
Plant-Prokaryote DOE project;Iojap;Iojap protein	0.374725	0.587741	0.00466293	0.00453568
Phages, Prophages, Transposable elements;Bacteriophage structural proteins;Phage_tail_proteins_2;Phage tail completion protein	0.998599	0.999985	0.000125518	0
Carbohydrates;Sugar alcohols;Mannitol_Utilization;Hydrolase in polyol utilization gene cluster, haloacid dehalogenase-like family	0.451964	0.658781	0.00045302	0.000327647
Clustering-based subsystems;Shiga toxin cluster;CBSS-194948.1.peg.143;antitermination protein Q	0.998053	0.999985	0.000124076	0
Stress Response;Universal_stress_protein_family;Universal stress protein F	0.996395	0.999985	0.000124076	0
Carbohydrates;Sugar alcohols;Mannitol_Utilization;PTS system, mannitol-specific IIB component (EC 2.7.1.69)	0.952192	0.999985	0.00105753	0.00093385
Protein Metabolism;Protein folding;Periplasmic_disulfide_interchange;Periplasmic thiol:disulfide oxidoreductase DsbB, required for DsbA reoxidation	0.120798	0.274486	0.000214968	9.133e-05
Carbohydrates;Monosaccharides;D-ribose_utilization;Ribose ABC transport system, ATP-binding protein RbsA (TC 3.A.1.2.1)	0.120989	0.274579	0.0192937	0.0191702
Amino Acids and Derivatives;Lysine, threonine, methionine, and cysteine;Lysine_degradation;L-lysine permease	0.996371	0.999985	0.000122633	0
Virulence;Type III, Type IV, Type VI, ESAT secretion systems;Type_4_conjugative_transfer_system,_IncI1_type;IncI1 plasmid conjugative transfer inner membrane protein PilR	0.999947	0.999985	0.000122633	0
Cell Wall and Capsule;Murein_Hydrolases	0.763066	0.972853	0.0027917	0.00266912
Clustering-based subsystems;Shiga toxin cluster;CBSS-194948.1.peg.143;Lipoprotein Bor	0.996524	0.999985	0.00012119	0
Virulence;Iron Scavenging Mechanisms;Transport_of_Iron;Periplasmic protein p19 involved in high-affinity Fe2+ transport	0.738221	0.947373	0.000193327	7.42057e-05
Carbohydrates;Monosaccharides;L-fucose_utilization_temp;dehydrogenase clustered with L-fuconate utilization genes	1.26659e-09	3.99598e-08	0.000154373	3.53904e-05
Amino Acids and Derivatives;Aromatic amino acids and derivatives;Tryptophan_catabolism;4-oxalocrotonate decarboxylase (EC 4.1.1.77)	0.940496	0.999985	0.000219296	0.000100463
Miscellaneous;Broadly_distributed_proteins_not_in_subsystems	0.997952	0.999985	0.000118305	0
Miscellaneous;Broadly_distributed_proteins_not_in_subsystems;Putative oxidoreductase YncB	0.997952	0.999985	0.000118305	0
Clustering-based subsystems;Cell Division;CBSS-393130.3.peg.794;Septation ring formation regulator EzrA	0.357714	0.571303	0.000230838	0.000113021
Cell Wall and Capsule;Gram-Negative cell wall components;LOS_core_oligosaccharide_biosynthesis;Phosphoheptose isomerase (EC 5.3.1.-)	0.839927	0.999985	0.00169666	0.00157887
Membrane Transport;ABC transporters;ABC_transporter_alkylphosphonate_(TC_3.A.1.9.1)	0.979563	0.999985	0.000350586	0.000232892
Membrane Transport;ABC transporters;ABC_transporter_alkylphosphonate_(TC_3.A.1.9.1);Phosphonate ABC transporter ATP-binding protein (TC 3.A.1.9.1)	0.979563	0.999985	0.000350586	0.000232892
Photosynthesis;Electron transport and photophosphorylation	0.124657	0.280096	0.000191884	7.42057e-05
Photosynthesis;Electron transport and photophosphorylation;Photosystem_II	0.124657	0.280096	0.000191884	7.42057e-05
Photosynthesis;Electron transport and photophosphorylation;Photosystem_II;Putative chaperon-like protein Ycf39 for quinone binding in Photosystem II	0.124657	0.280096	0.000191884	7.42057e-05
Regulation and Cell signaling;Orphan_regulatory_proteins;Copper sensory histidine kinase CusS	0.126575	0.283083	0.0112245	0.0111069
Carbohydrates;Sugar alcohols;Glycerol_and_Glycerol-3-phosphate_Uptake_and_Utilization;Glycerol uptake operon antiterminator regulatory protein	0.37205	0.585368	0.00121334	0.00109596
Virulence;Type III, Type IV, Type VI, ESAT secretion systems;Type_IV_pilus;Type IV fimbrial biogenesis protein PilW	0.960565	0.999985	0.000161587	4.45234e-05
Stress Response;Universal_stress_protein_family;Universal stress protein B	0.99866	0.999985	0.000116862	0
Carbohydrates;Di- and oligosaccharides;Beta-Glucoside_Metabolism;Beta-glucanase precursor (EC 3.2.1.73)	0.0923594	0.226139	0.0277049	0.0275897
Cofactors, Vitamins, Prosthetic Groups, Pigments;Tetrapyrroles;Coenzyme_B12_biosynthesis;Vitamin B12 ABC transporter, B12-binding component BtuF	0.211984	0.408781	0.000336158	0.000221475
Carbohydrates;Sugar alcohols;Mannitol_Utilization;Transcriptional regulator of mannitol utilization, DeoR family protein	0.997907	0.999985	0.000113976	0
Virulence;Resistance to antibiotics and toxic compounds;Bacitracin_Stress_Response;Transporter LiaF	0.999944	0.999985	0.000113976	0
DNA Metabolism;DNA_phosphorothioation	0.0593022	0.165043	0.000209197	9.58965e-05
DNA Metabolism;DNA_phosphorothioation;NifS-like cysteine desulfurase DndA	0.0593022	0.165043	0.000209197	9.58965e-05
Respiration;Sodium Ion-Coupled Energetics;Na+_translocating_decarboxylases_and_related_biotin-dependent_enzymes;Biotin carboxyl carrier protein of methylmalonyl-CoA:Pyruvate transcarboxylase	0.743057	0.952707	0.00134608	0.00123296
Carbohydrates;Sugar alcohols;Propanediol_utilization;Propanediol diffusion facilitator	0.999944	0.999985	0.000112534	0
Metabolism of Aromatic Compounds;Phenylacetyl-CoA_catabolic_pathway_(core);Phenylacetic acid degradation protein PaaE, ketothiolase	0.999944	0.999985	0.000112534	0
Cell Wall and Capsule;Capsular and extracellular polysacchrides;Capsular_Polysaccharide_(CPS)_of_Campylobacter;Capsular polysaccharide ABC transporter, ATP-binding protein KpsT	0.999943	0.999985	0.000111091	0
Membrane Transport;ECF_class_transporters;Transmembrane component SS1135 of energizing module of predicted ECF transporter	0.999943	0.999985	0.000111091	0
Virulence;Type III, Type IV, Type VI, ESAT secretion systems;Type_III_secretion_system;Type III secretion inner membrane protein (YscQ,homologous to flagellar export components)	0.998638	0.999985	0.000111091	0
Virulence;Iron Scavenging Mechanisms;Hemin_transport_system;Haemin uptake system permease protein	0.0787127	0.200507	0.000148602	3.76736e-05
Respiration;Electron donating reactions;Formate_dehydrogenase;Formate dehydrogenase N beta subunit (EC 1.2.1.2)	0.204201	0.398565	0.000311632	0.000200926
Fatty Acids, Lipids, and Isoprenoids;Fatty acids;Phospholipid_and_Fatty_acid_biosynthesis_related_cluster;3-hydroxydecanoyl-[ACP] dehydratase (EC 4.2.1.60)	0.244389	0.450609	0.00194625	0.00183573
Membrane Transport;ABC transporters;Periplasmic-Binding-Protein-Dependent_Transport_System_for_&#945;-Glucosides	0.219182	0.418054	0.000164472	5.4798e-05
DNA Metabolism;DNA uptake, competence;Gram_Positive_Competence;Late competence protein ComGB, access of DNA to ComEA	0.414212	0.62302	0.000113976	4.5665e-06
Virulence;Iron Scavenging Mechanisms;Iron(III)_dicitrate_transport_system_Fec;Iron(III) dicitrate transport protein FecA	0.999942	0.999985	0.000108205	0
Membrane Transport;ECF_class_transporters;ATPase component STY3232 of energizing module of queuosine-regulated ECF transporter	0.667632	0.877036	0.00022651	0.000118729
Membrane Transport;ABC transporters;Periplasmic-Binding-Protein-Dependent_Transport_System_for_&#945;-Glucosides;Alpha-glucoside transport system permease protein AglG	0.29381	0.502611	0.000150045	4.33818e-05
Carbohydrates;Monosaccharides;Deoxyribose_and_Deoxynucleoside_Catabolism;Nucleoside permease NupC	0.76284	0.972853	0.000781965	0.000675842
Dormancy and Sporulation;Bacillus_biofilm_matrix_protein_component_TasA_and_homologs	0.182519	0.36858	0.000321731	0.000215767
Dormancy and Sporulation;Bacillus_biofilm_matrix_protein_component_TasA_and_homologs;Signal peptidase SipW (EC 3.4.21.89), required for TasA secretion	0.182519	0.36858	0.000321731	0.000215767
Clustering-based subsystems;Shiga toxin cluster;CBSS-194948.1.peg.143;Protein NinB	0.998598	0.999985	0.00010532	0
Carbohydrates;CO2 fixation;CO2_uptake,_carboxysome;Carboxysome protein CcmL	0.497751	0.707737	0.000499188	0.000395002
Cell Wall and Capsule;Gram-Negative cell wall components;Lipopolysaccharide_assembly	0.285664	0.494738	0.0175206	0.0174166
Cofactors, Vitamins, Prosthetic Groups, Pigments;Quinone cofactors;Menaquinone_Biosynthesis_via_Futalosine_--_gjo;3-polyprenyl-4-hydroxybenzoate carboxy-lyase (EC 4.1.1.-)	0.415528	0.623958	0.00337889	0.00327532
Dormancy and Sporulation;Sporulation_Cluster_III_A;Stage III sporulation protein AB	0.259517	0.468246	0.00135329	0.00125122
Carbohydrates;Monosaccharides;D-Tagatose_and_Galactitol_Utilization;PTS system, galactitol-specific IIA component (EC 2.7.1.69)	0.268403	0.479313	0.00106618	0.000964674
Virulence;Type III, Type IV, Type VI, ESAT secretion systems;Type_III_secretion_system;Type III secretion bridge between inner and outermembrane lipoprotein (YscJ,HrcJ,EscJ, PscJ)	0.998582	0.999985	0.000100992	0
Nitrogen Metabolism;Nitrate_and_nitrite_ammonification;Nitrate reductase cytochrome c550-type subunit	0.122222	0.2764	0.000199098	9.81798e-05
Virulence;Streptococcus_agalactiae_virulome	0.75327	0.962276	0.00054247	0.000441809
Virulence;Streptococcus_agalactiae_virulome;Hemolysin III	0.75327	0.962276	0.00054247	0.000441809
Plant-Prokaryote DOE project;At2g23840;Probable 3-methyladenine DNA glycosylase/8-oxoguanine DNA glycosylase	0.0302204	0.0983249	0.000124076	2.39741e-05
Plant-Prokaryote DOE project;Experimental-PTPS;Dihydroneopterin triphosphate epimerase	0.996361	0.999985	9.9549e-05	0
Clustering-based subsystems;Conjugative_transfer_related_cluster;Conjugative signal peptidase TrhF	1.68311e-09	5.14148e-08	0.000113976	1.48411e-05
Cofactors, Vitamins, Prosthetic Groups, Pigments;Quinone cofactors;Tocopherol_Biosynthesis	0.433649	0.640982	0.000243823	0.000144986
Amino Acids and Derivatives;Lysine, threonine, methionine, and cysteine;Methionine_Biosynthesis;Homoserine O-acetyltransferase (EC 2.3.1.31)	0.956492	0.999985	0.000877185	0.000778589
Secondary Metabolism;Biosynthesis of phenylpropanoids;Phenylpropionate_Degradation;2,3-dihydroxy-2,3-dihydro-phenylpropionate dehydrogenase (EC 1.3.1.-)	0.997921	0.999985	9.81063e-05	0
Amino Acids and Derivatives;Lysine, threonine, methionine, and cysteine;Cysteine_Biosynthesis;Phosphoadenylyl-sulfate reductase [thioredoxin] (EC 1.8.4.8)	0.287407	0.495951	0.00501785	0.00492041
Amino Acids and Derivatives;Aromatic amino acids and derivatives;Phenylalanine_and_Tyrosine_Branches_from_Chorismate;Periplasmic chorismate mutase I precursor (EC 5.4.99.5)	0.999937	0.999985	9.66635e-05	0
Regulation and Cell signaling;Programmed Cell Death and Toxin-antitoxin Systems;Toxin-antitoxin_systems_(other_than_RelBE_and_MazEF);Antitoxin YgiT	0.997853	0.999985	9.66635e-05	0
Sulfur Metabolism;Inorganic sulfur assimilation;Inorganic_Sulfur_Assimilation;Putative sulfate permease	0.0969367	0.234513	0.00555166	0.00545583
Carbohydrates;Aminosugars;(GlcNAc)2_Catabolic_Operon;GlcNAc phosphomutase (EC 5.4.2.3)	0.633512	0.844025	0.000561225	0.000465783
RNA Metabolism;RNA processing and modification;tRNA_modification_Bacteria;tRNA 5-methylaminomethyl-2-thiouridine synthase TusB	0.996094	0.999985	9.52208e-05	0
Carbohydrates;Monosaccharides;D-Sorbitol(D-Glucitol)_and_L-Sorbose_Utilization;PTS system, glucitol/sorbitol-specific IIA component (EC 2.7.1.69)	0.647489	0.856421	0.000367898	0.00027399
Secondary Metabolism;Aromatic amino acids and derivatives;Cinnamic_Acid_Degradation;2,3-dihydroxyphenylpropionate 1,2-dioxygenase (EC 1.13.11.-)	0.999936	0.999985	9.3778e-05	0
Virulence;Type III, Type IV, Type VI, ESAT secretion systems;Type_4_secretion_and_conjugative_transfer	0.998514	0.999985	9.3778e-05	0
Virulence;Type III, Type IV, Type VI, ESAT secretion systems;Type_4_secretion_and_conjugative_transfer;IncF plasmid conjugative transfer protein TraR	0.998514	0.999985	9.3778e-05	0
Carbohydrates;Monosaccharides;L-Arabinose_utilization;L-arabinose transport system permease protein (TC 3.A.1.2.2)	0.236653	0.440463	0.00225356	0.00215996
Clustering-based subsystems;Shiga toxin cluster;CBSS-194948.1.peg.143;Phage lysis protein S	0.998057	0.999985	9.23353e-05	0
Motility and Chemotaxis;Flagellar motility in Prokaryota;Flagellum;Flagellar biosynthesis protein FliO	0.998503	0.999985	9.23353e-05	0
Virulence;Type III, Type IV, Type VI, ESAT secretion systems;Type_4_conjugative_transfer_system,_IncI1_type;IncI1 plasmid conjugative transfer ATPase PilQ	0.999935	0.999985	9.23353e-05	0
Virulence;Type III, Type IV, Type VI, ESAT secretion systems;Type_4_conjugative_transfer_system,_IncI1_type;IncI1 plasmid pilus assembly protein PilO	0.999935	0.999985	9.08926e-05	0
Cofactors, Vitamins, Prosthetic Groups, Pigments;Molybdopterin_cytosine_dinucleotide;CTP:molybdopterin cytidylyltransferase	0.345022	0.557276	0.00368908	0.00359955
Secondary Metabolism;Aromatic amino acids and derivatives;Cinnamic_Acid_Degradation;2-hydroxy-6-ketonona-2,4-dienedioic acid hydrolase (EC 3.7.1.-)	0.998538	0.999985	8.94498e-05	0
Membrane Transport;Transport_of_Zinc;Zinc ABC transporter, inner membrane permease protein ZnuB	0.911823	0.999985	0.00730747	0.0072185
Virulence;Iron Scavenging Mechanisms;Transport_of_Iron;Ferrous iron-sensisng transcriptional regulator FeoC	0.995993	0.999985	8.80071e-05	0
Metabolism of Aromatic Compounds;Benzoate_transport_and_degradation_cluster;Benzoate transport, inner-membrane translocator	0.999932	0.999985	8.65643e-05	0
Virulence;Invasion and intracellular resistance;Salmonella_invasion_locus;Surface presentation of antigens protein SpaP	0.999932	0.999985	8.65643e-05	0
RNA Metabolism;RNA processing and modification;tRNA_modification_Bacteria;Believed to be involved in assembly of Fe-S clusters	0.0121832	0.0492576	0.000142831	5.70813e-05
Amino Acids and Derivatives;Histidine Metabolism;Histidine_Biosynthesis;Imidazole glycerol phosphate synthase cyclase subunit (EC 4.1.3.-)	0.168453	0.346315	0.0121984	0.0121126
Virulence;Resistance to antibiotics and toxic compounds;Adaptation_to_d-cysteine;D-cysteine desulfhydrase (EC 4.4.1.15)	0.96887	0.999985	0.000885842	0.000800279
Membrane Transport;General transport systems;General_Secretion_Pathway;General secretion pathway protein G	0.391837	0.604239	0.000846888	0.000761464
Plant-Prokaryote DOE project;COG3760	0.00805044	0.0353551	9.66635e-05	1.14163e-05
Plant-Prokaryote DOE project;COG3760;UPF0434 protein YcaR	0.00805044	0.0353551	9.66635e-05	1.14163e-05
Clustering-based subsystems;Translation	0.99845	0.999985	8.51216e-05	0
Clustering-based subsystems;Translation;CBSS-326442.4.peg.1852	0.99845	0.999985	8.51216e-05	0
Clustering-based subsystems;Translation;CBSS-326442.4.peg.1852;tRNA 2-thiouridine synthesizing protein E (EC 2.8.1.-)	0.99845	0.999985	8.51216e-05	0
Virulence;Toxins and superantigens;Pertussis_toxin	0.996635	0.999985	8.51216e-05	0
Virulence;Toxins and superantigens;Pertussis_toxin;Major pilus subunit of type IV secretion complex, VirB2	0.996635	0.999985	8.51216e-05	0
Nucleosides and Nucleotides;Hydantoin_metabolism;N-methylhydantoinase B (EC 3.5.2.14)	0.256484	0.464851	0.00010532	2.16909e-05
Stress Response;Periplasmic Stress;Periplasmic_Stress_Response;Outer membrane stress sensor protease DegS	0.720908	0.931758	0.00139513	0.00131173
Phages, Prophages, Transposable elements;Bacteriophage structural proteins;Phage_tail_proteins_2;Phage tail assembly chaperone	0.998422	0.999985	8.22361e-05	0
DNA Metabolism;DNA uptake, competence;Gram_Positive_Competence;Late competence protein ComC, processing protease	0.634933	0.845333	0.000102434	2.05493e-05
Plant-Prokaryote DOE project;Iron-sulfur_cluster_assembly;Iron binding protein SufA for iron-sulfur cluster assembly	0.996441	0.999985	8.07934e-05	0
Protein Metabolism;Protein processing and modification;Ubiquitin-like_archaeal_modifier_proteins_(SAMPs)	0.0914508	0.224221	0.000142831	6.27894e-05
Protein Metabolism;Protein processing and modification;Ubiquitin-like_archaeal_modifier_proteins_(SAMPs);Ubiquitin-like small archaeal modifier protein SAMP1	0.0914508	0.224221	0.000142831	6.27894e-05
Sulfur Metabolism;Organic sulfur assimilation;Alkanesulfonate_assimilation	0.000135303	0.00117558	0.045491	0.0454116
Sulfur Metabolism;Organic sulfur assimilation;Alkanesulfonate_assimilation;Putative arylsulfatase regulatory protein	0.000135303	0.00117558	0.045491	0.0454116
Virulence;Iron Scavenging Mechanisms;Siderophore_assembly_kit;Hemin ABC transporter, permease protein	0.931602	0.999985	0.00109937	0.00102061
Respiration;Formate_hydrogenase;Hydrogenase-4 component H (EC 1.-.-.-)	0.998413	0.999985	7.79079e-05	0
Carbohydrates;Fermentation;Acetoin,_butanediol_metabolism;Acetoin (diacetyl) reductase (EC 1.1.1.5)	0.178817	0.363011	0.000186113	0.000108454
Nitrogen Metabolism;Nitrate_and_nitrite_ammonification;Ferredoxin--nitrite reductase (EC 1.7.7.1)	0.916714	0.999985	0.00013706	6.05062e-05
Membrane Transport;Potassium_homeostasis;Putative cytoplasmic protein ,probably associated with Glutathione-regulated potassium-efflux	0.997279	0.999985	7.64652e-05	0
Virulence;Type III, Type IV, Type VI, ESAT secretion systems;Type_4_conjugative_transfer_system,_IncI1_type;IncI1 plasmid conjugative transfer lipoprotein PilN	0.999926	0.999985	7.64652e-05	0
Clustering-based subsystems;KH_domain_RNA_binding_protein_YlqC	0.204895	0.39911	0.00586185	0.00578576
Clustering-based subsystems;KH_domain_RNA_binding_protein_YlqC;SSU ribosomal protein S16p	0.204895	0.39911	0.00586185	0.00578576
Respiration;Electron accepting reactions;Anaerobic_respiratory_reductases;CoB--CoM heterodisulfide reductase subunit A (EC 1.8.98.1)	0.897962	0.999985	0.00619368	0.00611797
Clustering-based subsystems;CBSS-176280.1.peg.1561;Acyl-CoA hydrolase (EC 3.1.2.20)	0.933998	0.999985	0.000206312	0.000131287
Photosynthesis;Proteorhodopsin;Phytoene synthase (EC 2.5.1.32)	0.47162	0.679561	0.00108494	0.00101034
Carbohydrates;Fermentation;Acetoin,_butanediol_metabolism;Acetoin catabolism protein X	0.999923	0.999985	7.21369e-05	0
Clustering-based subsystems;Bacteriophage_P4_cluster	0.999923	0.999985	7.21369e-05	0
Clustering-based subsystems;Bacteriophage_P4_cluster;FIG033266: Phage DNA binding protein	0.999923	0.999985	7.21369e-05	0
Clustering-based subsystems;Conjugative_transfer_related_cluster;Conjugative transfer protein s043	0.999923	0.999985	7.21369e-05	0
Respiration;Sodium Ion-Coupled Energetics;Na+_translocating_decarboxylases_and_related_biotin-dependent_enzymes;Biotin carboxyl carrier protein of glutaconyl-CoA decarboxylase	0.999923	0.999985	7.21369e-05	0
Respiration;Electron accepting reactions;Anaerobic_respiratory_reductases;Formate dehydrogenase -O, gamma subunit (EC 1.2.1.2)	0.205223	0.399226	0.00040541	0.000333355
Carbohydrates;One-carbon Metabolism;Serine-glyoxylate_cycle;Methylcrotonyl-CoA carboxylase biotin-containing subunit (EC 6.4.1.4)	0.964228	0.999985	0.000115419	4.33818e-05
Phages, Prophages, Transposable elements;Listeria_phi-A118-like_prophages;Antirepressor [Bacteriophage A118]	0.447198	0.654473	0.00535256	0.00528116
Cell Wall and Capsule;Capsular and extracellular polysacchrides;Capsular_heptose_biosynthesis;Capsular polysaccharide biosynthesis protein WcbJ, NAD-dependent epimerase/dehydratase family	0.999922	0.999985	7.06942e-05	0
Membrane Transport;Uni- Sym- and Antiporters;Sodium_Hydrogen_Antiporter;Na(+) H(+) antiporter subunit B	0.332868	0.54536	0.000277006	0.000206634
Clustering-based subsystems;Conjugative_transfer_related_cluster;Conjugative transfer protein TraV	0.999921	0.999985	6.92515e-05	0
Cofactors, Vitamins, Prosthetic Groups, Pigments;Molybdopterin_cytosine_dinucleotide;Periplasmic aromatic aldehyde oxidoreductase, iron-sulfur subunit YagT	0.99862	0.999985	6.92515e-05	0
Respiration;Formate_hydrogenase;Hydrogenase-4 component I (EC 1.-.-.-)	0.998338	0.999985	6.92515e-05	0
Dormancy and Sporulation;Sporulation_Cluster_III_A;Stage III sporulation protein AF	0.705946	0.915185	0.000926238	0.000857361
Cofactors, Vitamins, Prosthetic Groups, Pigments;Quinone cofactors;Menaquinone_Biosynthesis_via_Futalosine_--_gjo;Menaquinone via futalosine step 4	0.969543	0.999985	0.000450135	0.000381303
RNA Metabolism;RNA processing and modification;tRNA_modification_Bacteria;Queuosine Biosynthesis QueE Radical SAM	0.6345	0.845048	0.00598015	0.00591134
Clustering-based subsystems;Shiga toxin cluster;CBSS-194948.1.peg.143;Putative DNA-binding protein Roi of bacteriophage BP-933W	0.998379	0.999985	6.78087e-05	0
Carbohydrates;Di- and oligosaccharides;Lactose_and_Galactose_Uptake_and_Utilization;Beta-galactosidase small subunit (EC 3.2.1.23)	0.086068	0.214141	0.00281334	0.00274561
Membrane Transport;Uni- Sym- and Antiporters;Sodium_Hydrogen_Antiporter;Na(+) H(+) antiporter subunit C	0.241697	0.446826	8.94498e-05	2.28325e-05
Nitrogen Metabolism;Denitrification;Nitrous oxide reductase maturation periplasmic protein NosX	0.999919	0.999985	6.6366e-05	0
Clustering-based subsystems;Lipopolysaccharide_assembly_cluster	0.998242	0.999985	6.49233e-05	0
Clustering-based subsystems;Lipopolysaccharide_assembly_cluster;Phosphocarrier protein, nitrogen regulation associated	0.998242	0.999985	6.49233e-05	0
Clustering-based subsystems;Conjugative_transfer_related_cluster;IncF plasmid conjugative transfer protein TraD	0.29501	0.502875	0.000480432	0.000415552
Protein Metabolism;Protein biosynthesis;Translation_initiation_factors_bacterial;Translation initiation factor 1	0.313382	0.524894	0.00327213	0.00320797
Stress Response;Cold shock;Cold_shock,_CspA_family_of_proteins;Cold shock protein CspA	0.912752	0.999985	0.000155816	9.24717e-05
Cofactors, Vitamins, Prosthetic Groups, Pigments;Riboflavin, FMN, FAD;Riboflavin,_FMN_and_FAD_metabolism;Pyrimidine deaminase archaeal predicted (EC 3.5.4.26)	0.57779	0.788929	0.000415509	0.000352762
Clustering-based subsystems;Shiga toxin cluster;CBSS-194948.1.peg.143;Ren protein	0.998325	0.999985	6.20378e-05	0
Respiration;Electron donating reactions;Coenzyme_F420-H2_dehydrogenase_(methanophenazine);Coenzyme F(420)H(2) dehydrogenase (methanophenazine) subunit FpoI	0.605182	0.817601	6.34805e-05	3.42488e-06
Plant-Prokaryote DOE project;At3g21300;Aspartyl-tRNA(Asn) amidotransferase subunit C (EC 6.3.5.6)	0.184066	0.370538	0.00133742	0.00127748
Carbohydrates;Central carbohydrate metabolism;Methylglyoxal_Metabolism;Aldehyde dehydrogenase B (EC 1.2.1.22)	0.643062	0.85309	0.00106186	0.00100235
Clustering-based subsystems;proteosome related;Cluster-based_Subsystem_Grouping_Hypotheticals_-_perhaps_Proteosome_Related;Prokaryotic ubiquitin-like protein Pup	0.999943	0.999985	5.91523e-05	0
Secondary Metabolism;Biosynthesis of phenylpropanoids;Phenylpropionate_Degradation;3-phenylpropionate dioxygenase, beta subunit (EC 1.14.12.19)	0.999943	0.999985	5.91523e-05	0
Amino Acids and Derivatives;Lysine, threonine, methionine, and cysteine;Lysine_biosynthesis_AAA_pathway_2;Homoaconitase large subunit (EC 4.2.1.36)	0.56401	0.778092	0.000144274	8.56219e-05
RNA Metabolism;RNA processing and modification;tRNA_modification_Archaea;tRNA and rRNA cytosine-C5-methylase Type 1	0.97411	0.999985	0.000865643	0.000807129
Miscellaneous;Luciferases;LuxA, luciferase alpha chain (EC 1.14.14.3)	0.999942	0.999985	5.77096e-05	0
Membrane Transport;Uni- Sym- and Antiporters;Sodium_Hydrogen_Antiporter	0.182778	0.368911	0.00176303	0.00170559
Nucleosides and Nucleotides;Pyrimidines;pyrimidine_conversions;Purine trans deoxyribosylase (Nucleoside deoxyribosyltransferase-I) (EC 2.4.2.6)	0.00401648	0.0199477	0.000103877	4.68066e-05
Respiration;Carbon_monoxide_induced_hydrogenase;CO dehydrogenase/acetyl-CoA synthase, CO dehydrogenase subunit (EC 1.2.99.2)	0.153647	0.325296	0.000108205	5.13731e-05
Carbohydrates;Central carbohydrate metabolism;Glycolysis_and_Gluconeogenesis;Non-phosphorylating glyceraldehyde-3-phosphate dehydrogenase (NADP) (EC 1.2.1.9)	0.218446	0.417269	0.000233724	0.000176952
Membrane Transport;Potassium_homeostasis;Trk system potassium uptake protein TrkG	0.999941	0.999985	5.62668e-05	0
Cell Wall and Capsule;Capsular and extracellular polysacchrides;Extracellular_Polysaccharide_Biosynthesis_of_Streptococci;Tyrosine-protein phosphatase CpsB (EC 3.1.3.48)	0.99994	0.999985	5.48241e-05	0
Clustering-based subsystems;Carbohydrates;Beta-lactamase_cluster_in_Streptococcus	0.99994	0.999985	5.48241e-05	0
Clustering-based subsystems;Carbohydrates;Beta-lactamase_cluster_in_Streptococcus;Aquaporin (Major Intrinsic Protein Family)	0.99994	0.999985	5.48241e-05	0
Stress Response;Oxidative stress;Glutaredoxins;Glutaredoxin	0.0659575	0.177532	7.79079e-05	2.39741e-05
Amino Acids and Derivatives;Lysine, threonine, methionine, and cysteine;Threonine_anaerobic_catabolism_gene_cluster;Threonine catabolic operon transcriptional activator TdcR	0.998122	0.999985	5.33813e-05	0
Virulence;Resistance to antibiotics and toxic compounds;Mercury_resistance_operon	0.999939	0.999985	5.33813e-05	0
Virulence;Resistance to antibiotics and toxic compounds;Mercury_resistance_operon;Mercuric transport protein, MerT	0.999939	0.999985	5.33813e-05	0
Clustering-based subsystems;alpha-proteobacterial cluster of hypotheticals	0.999938	0.999985	5.19386e-05	0
Clustering-based subsystems;alpha-proteobacterial cluster of hypotheticals;CBSS-52598.3.peg.2843	0.999938	0.999985	5.19386e-05	0
Clustering-based subsystems;alpha-proteobacterial cluster of hypotheticals;CBSS-52598.3.peg.2843;FIG003492: Threonine dehydrogenase and related Zn-dependent dehydrogenases	0.999938	0.999985	5.19386e-05	0
Virulence;Invasion and intracellular resistance;Salmonella_invasion_locus;Surface presentation of antigens protein SpaQ	0.998233	0.999985	5.19386e-05	0
Nitrogen Metabolism;Nitrate_and_nitrite_ammonification;Cytochrome c-type protein NrfB precursor	0.0637777	0.173607	0.000294319	0.000243166
Protein Metabolism;Protein biosynthesis;Ribosome_LSU_bacterial;LSU ribosomal protein L32p	0.00096869	0.00632237	0.00199242	0.00194305
Carbohydrates;One-carbon Metabolism;Serine-glyoxylate_cycle;Methylenetetrahydrofolate dehydrogenase (NADP+) (EC 1.5.1.5)	0.334303	0.546615	0.0131506	0.0131013
Clustering-based subsystems;PFGI-1-like_cluster_1	0.998178	0.999985	4.90531e-05	0
Clustering-based subsystems;PFGI-1-like_cluster_1;Single-stranded DNA-binding protein in PFGI-1-like cluster	0.998178	0.999985	4.90531e-05	0
Fatty Acids, Lipids, and Isoprenoids;Fatty acids;Fatty_Acid_Biosynthesis_FASII;Trans-2,cis-3-Decenoyl-ACP isomerase	0.999935	0.999985	4.90531e-05	0
Secondary Metabolism;Biosynthesis of phenylpropanoids;Phenylpropionate_Degradation;3-phenylpropionate dioxygenase, alpha subunit (EC 1.14.12.19)	0.999935	0.999985	4.90531e-05	0
Carbohydrates;Monosaccharides;D-allose_utilization;D-allose-6-phosphate isomerase (EC 5.3.1.-)	0.287708	0.495951	0.000139946	9.133e-05
Membrane Transport;Potassium_homeostasis;TrkA-N:Sodium/hydrogen exchanger	0.758911	0.968839	0.00108205	0.00103431
Phosphorus Metabolism;Phosphate_metabolism;Phosphate transport system permease protein PstA (TC 3.A.1.7.1)	0.0502545	0.14676	0.0136353	0.0135876
Virulence;Type III, Type IV, Type VI, ESAT secretion systems;Type_4_conjugative_transfer_system,_IncI1_type;IncI1 plasmid conjugative transfer prepilin PilS	0.999934	0.999985	4.76104e-05	0
Cell Wall and Capsule;Sortase;LPXTG specific sortase A	0.999932	0.999985	4.61676e-05	0
Clustering-based subsystems;Pyruvate kinase associated cluster	0.999932	0.999985	4.61676e-05	0
Clustering-based subsystems;Pyruvate kinase associated cluster;CBSS-288000.5.peg.1793	0.999932	0.999985	4.61676e-05	0
Clustering-based subsystems;Pyruvate kinase associated cluster;CBSS-288000.5.peg.1793;putative esterase	0.999932	0.999985	4.61676e-05	0
Membrane Transport;Transport_of_Nickel_and_Cobalt;Nickel responsive regulator NikR	0.364196	0.577106	0.000297204	0.000251158
DNA Metabolism;DNA repair;DNA_repair,_bacterial_UvrD_and_related_helicases;putative ATP-dependent DNA helicase YjcD	0.063265	0.172455	0.000572767	0.000527431
Respiration;Soluble_cytochromes_and_functionally_related_electron_carriers;Cytochrome C553 (soluble cytochrome f)	0.999931	0.999985	4.47249e-05	0
RNA Metabolism;RNA processing and modification;tRNA_modification_Bacteria;Queuosine Biosynthesis QueC ATPase	0.316018	0.526559	0.0071329	0.00708835
Virulence;Iron Scavenging Mechanisms;Campylobacter_Iron_Metabolism;Ferric receptor CfrA	0.949517	0.999985	0.00319855	0.00315431
Protein Metabolism;Protein biosynthesis;Universal_GTPases;GTP-binding protein YqeH, required for biogenesis of 30S ribosome subunit	0.949797	0.999985	0.000165915	0.000122154
Nitrogen Metabolism;Nitrate_and_nitrite_ammonification;Nitrite reductase probable electron transfer 4Fe-S subunit (EC 1.7.1.4)	0.42485	0.632591	5.04959e-05	6.84975e-06
Virulence;Toxins and superantigens;Prophage-encoded_Exotoxins	0.998646	0.999985	4.32822e-05	0
Virulence;Toxins and superantigens;Prophage-encoded_Exotoxins;Mitogenic factor 3	0.998646	0.999985	4.32822e-05	0
Amino Acids and Derivatives;Aromatic amino acids and derivatives;Common_Pathway_For_Synthesis_of_Aromatic_Compounds_(DAHP_synthase_to_chorismate);2-amino-3,7-dideoxy-D-threo-hept-6-ulosonate synthase (EC 2.5.1.-)	0.215578	0.413289	0.000141388	9.81798e-05
Respiration;Electron accepting reactions;Anaerobic_respiratory_reductases;CoB--CoM heterodisulfide reductase subunit C (EC 1.8.98.1)	0.627511	0.837189	0.00167791	0.00163595
Cofactors, Vitamins, Prosthetic Groups, Pigments;Coenzyme A;Coenzyme_A_Biosynthesis;Phosphopantothenoylcysteine synthetase (EC 6.3.2.5)	0.466389	0.675369	4.32822e-05	2.28325e-06
Carbohydrates;Monosaccharides;D-gluconate_and_ketogluconates_metabolism;High-affinity gluconate transporter GntT	0.165533	0.341079	0.000529485	0.000488616
Amino Acids and Derivatives;Aromatic amino acids and derivatives;Phenylalanine_and_Tyrosine_Branches_from_Chorismate;Biosynthetic Aromatic amino acid aminotransferase beta (EC 2.6.1.57)	0.260266	0.46921	0.000731469	0.000690683
Virulence;Iron Scavenging Mechanisms;Iron_acquisition_in_Vibrio;Putative heme iron utilization protein	0.978414	0.999985	0.000167358	0.00012672
Plant-Prokaryote DOE project;Experimental-PTPS;Sepiapterin reductase (EC 1.1.1.153)	0.999925	0.999985	4.03967e-05	0
Dormancy and Sporulation;Sporulation_gene_orphans;Stage V sporulation protein required for dehydratation of the spore core and assembly of the coat (SpoVS)	0.370612	0.584375	6.6366e-05	2.62574e-05
Virulence;Type III, Type IV, Type VI, ESAT secretion systems;Type_III_secretion_system;Type III secretion inner membrane protein (YscS,homologous to flagellar export components)	0.465861	0.675113	4.18394e-05	2.28325e-06
Nitrogen Metabolism;Nitrate_and_nitrite_ammonification;Nitrate ABC transporter, ATP-binding protein	0.738405	0.947373	0.000230838	0.000191793
Nucleosides and Nucleotides;Purines;De_Novo_Purine_Biosynthesis;PurR: transcription regulator associated with purine metabolism	0.384356	0.597009	4.47249e-05	5.70813e-06
Virulence;Iron Scavenging Mechanisms;Iron_acquisition_in_Vibrio;Bacterioferritin-associated ferredoxin	0.997195	0.999985	3.8954e-05	0
Protein Metabolism;Protein biosynthesis;Ribosome_activity_modulation;Ribosome modulation factor	0.998573	0.999985	3.75112e-05	0
Stress Response;Osmotic stress;Choline_and_Betaine_Uptake_and_Betaine_Biosynthesis;Choline ABC transport system, permease protein OpuBB	0.998564	0.999985	3.75112e-05	0
Regulation and Cell signaling;DNA-binding_regulatory_proteins,_strays;LysR family transcriptional regulator PA5437	0.338679	0.550775	0.000111091	7.42057e-05
Membrane Transport;ECF_class_transporters;Substrate-specific component NikM of nickel ECF transporter	0.436203	0.643155	0.000160144	0.000123296
Clustering-based subsystems;Shiga toxin cluster;CBSS-194948.1.peg.143;Protein NinE	0.998544	0.999985	3.60685e-05	0
Carbohydrates;Sugar alcohols;Glycerol_fermenation_to_1,3-propanediol;Glycerol dehydratase small subunit (EC 4.2.1.30)	0.416117	0.624418	8.51216e-05	4.90899e-05
Protein Metabolism;Selenoproteins;Glycine_reductase,_sarcosine_reductase_and_betaine_reductase;Betaine reductase component B alpha subunit (EC 1.21.4.4)	0.0504848	0.147021	0.00012119	8.56219e-05
Miscellaneous;ZZ_gjo_need_homes;Mitochondrial processing peptidase-like protein (EC 3.4.24.64)	0.158115	0.331834	0.0621705	0.0621353
Cell Wall and Capsule;Gram-Negative cell wall components;KDO2-Lipid_A_biosynthesis;UDP-N-acetylglucosamine 4-epimerase (EC 5.1.3.7)	0.999916	0.999985	3.46257e-05	0
Clustering-based subsystems;Membrane-bound hydrogenase;CBSS-69014.3.peg.2094;Membrane bound hydrogenase, MbhB subunit	0.998501	0.999985	3.46257e-05	0
Protein Metabolism;Protein degradation;Aminopeptidases_(EC_3.4.11.-);Peptidase B (EC 3.4.11.23)	0.999916	0.999985	3.46257e-05	0
Metabolism of Aromatic Compounds;Benzoate_transport_and_degradation_cluster;Benzoate transport, extracellular ligand-binding receptor	0.0514691	0.149175	5.33813e-05	1.94076e-05
Carbohydrates;Monosaccharides;D-Tagatose_and_Galactitol_Utilization;PTS system, galactitol-specific IIB component (EC 2.7.1.69)	0.382743	0.595171	0.000499188	0.000466925
Respiration;Electron accepting reactions;Anaerobic_respiratory_reductases;CoB--CoM heterodisulfide reductase subunit B (EC 1.8.98.1)	0.595848	0.807826	0.00263588	0.00260405
Amino Acids and Derivatives;Arginine; urea cycle, polyamines;Arginine_Biosynthesis_extended;Acetylornithine aminotransferase 2 (EC 2.6.1.11)	0.99991	0.999985	3.17403e-05	0
Nucleosides and Nucleotides;Hydantoin_metabolism;N-carbamoyl-L-amino acid hydrolase (EC 3.5.1.87)	0.998456	0.999985	3.17403e-05	0
Plasmids;Plasmid transfer;Plasmid-encoded_T-DNA_transfer;Inner membrane protein forms channel for type IV secretion of T-DNA complex, VirB3	0.99991	0.999985	3.17403e-05	0
Clustering-based subsystems;Spore_Coat;Spore coat protein F	0.120468	0.274182	0.000251037	0.000220334
Protein Metabolism;Protein biosynthesis;Translation_elongation_factors_bacterial;Translation elongation factor G paralog	0.999906	0.999985	3.02975e-05	0
Virulence;Iron Scavenging Mechanisms;Siderophore_Staphylobactin	0.988351	0.999985	7.50224e-05	4.5665e-05
Virulence;Iron Scavenging Mechanisms;Siderophore_Staphylobactin;Siderophore staphylobactin biosynthesis protein SbnB	0.988351	0.999985	7.50224e-05	4.5665e-05
Fatty Acids, Lipids, and Isoprenoids;Polyhydroxybutyrate_metabolism;Butyrate-acetoacetate CoA-transferase subunit A (EC 2.8.3.9)	0.503862	0.713988	0.000336158	0.000307097
Carbohydrates;Monosaccharides;D-gluconate_and_ketogluconates_metabolism;Gluconate permease, Bsu4004 homolog	0.425585	0.63344	0.000122633	9.36133e-05
Metabolism of Aromatic Compounds;Anaerobic degradation of aromatic compounds	0.999902	0.999985	2.88548e-05	0
Metabolism of Aromatic Compounds;Anaerobic degradation of aromatic compounds;Anaerobic_benzoate_metabolism	0.999902	0.999985	2.88548e-05	0
Metabolism of Aromatic Compounds;Anaerobic degradation of aromatic compounds;Anaerobic_benzoate_metabolism;2-hydroxycyclohexanecarboxyl-CoA dehydrogenase (EC 1.1.1.-)	0.999902	0.999985	2.88548e-05	0
Amino Acids and Derivatives;Aromatic amino acids and derivatives;Aromatic_amino_acid_degradation;Aromatic-L-amino-acid decarboxylase (EC 4.1.1.28)	0.990701	0.999985	0.00024238	0.000214626
Amino Acids and Derivatives;Aromatic amino acids and derivatives;Aromatic_amino_acid_degradation;Tryptophan 2-monooxygenase (EC 1.13.12.3)	0.999898	0.999985	2.7412e-05	0
Clustering-based subsystems;Conjugative_transfer_related_cluster;IncF plasmid conjugative transfer pilus assembly protein TraL	0.999898	0.999985	2.7412e-05	0
Membrane Transport;Uni- Sym- and Antiporters;Sodium_Hydrogen_Antiporter;Na(+) H(+) antiporter subunit B (TC 2.A.63.1.2)	0.999898	0.999985	2.7412e-05	0
Respiration;Sodium Ion-Coupled Energetics;Na+_translocating_decarboxylases_and_related_biotin-dependent_enzymes;Membrane protein associated with oxaloacetate decarboxylase	0.999898	0.999985	2.7412e-05	0
Metabolism of Aromatic Compounds;Metabolism of central aromatic intermediates;Protocatechuate_branch_of_beta-ketoadipate_pathway;3-oxoadipate enol-lactone hydrolase	0.88342	0.999985	3.60685e-05	9.133e-06
Regulation and Cell signaling;Programmed Cell Death and Toxin-antitoxin Systems;Toxin-antitoxin_systems_(other_than_RelBE_and_MazEF);VapB protein (antitoxin to VapC)	0.00419836	0.0207173	3.46257e-05	7.99138e-06
Amino Acids and Derivatives;Aromatic amino acids and derivatives;Phenylalanine_and_Tyrosine_Branches_from_Chorismate;Chorismate mutase I (EC 5.4.99.5)	0.403474	0.613998	0.000564111	0.000537706
Cell Wall and Capsule;Gram-Positive cell wall components;Polyglycerolphosphate_lipoteichoic_acid_biosynthesis;Glycosyltransferase LafA, responsible for the formation of Glc-DAG	0.998291	0.999985	2.59693e-05	0
Virulence;Iron Scavenging Mechanisms;Heme,_hemin_uptake_and_utilization_systems_in_GramPositives;Iron compound ABC uptake transporter ATP-binding protein PiuD	0.999894	0.999985	2.59693e-05	0
Carbohydrates;Aminosugars;(GlcNAc)2_Catabolic_Operon;(GlcNAc)2 ABC transporter, ATP-binding component 2	0.0100825	0.0424126	3.02975e-05	4.5665e-06
Cell Wall and Capsule;Gram-Negative cell wall components;Core_Oligosaccharide_Glycosylation_in_Pseudomonas	0.999889	0.999985	2.45266e-05	0
Cell Wall and Capsule;Gram-Negative cell wall components;Core_Oligosaccharide_Glycosylation_in_Pseudomonas;Glycosyl transferase in large core OS assembly cluster	0.999889	0.999985	2.45266e-05	0
Stress Response;Osmotic stress;Choline_and_Betaine_Uptake_and_Betaine_Biosynthesis;Choline ABC transport system, permease protein OpuBD	0.999889	0.999985	2.45266e-05	0
Cofactors, Vitamins, Prosthetic Groups, Pigments;Tetrapyrroles;Coenzyme_B12_biosynthesis;Vitamin B12 ABC transporter, permease component BtuC	0.3419	0.554328	0.000532371	0.000508023
Nitrogen Metabolism;Nitrogen_fixation;Iron-sulfur cluster assembly scaffold protein NifU	0.606056	0.818365	0.000148602	0.000124437
Carbohydrates;Monosaccharides;L-fucose_utilization_temp;2,4-diketo-3-deoxy-L-fuconate hydrolase	0.323971	0.536148	9.23353e-05	6.84975e-05
Carbohydrates;Di- and oligosaccharides;Beta-Glucoside_Metabolism;PTS system, cellobiose-specific IIB component (EC 2.7.1.69)	0.591881	0.804715	0.0012725	0.00124894
Cell Wall and Capsule;Gram-Negative cell wall components;Lipid_A_modifications	0.999883	0.999985	2.30838e-05	0
Cell Wall and Capsule;Gram-Negative cell wall components;Lipid_A_modifications;Sensor protein PhoQ (EC 2.7.13.3)	0.999883	0.999985	2.30838e-05	0
Nucleosides and Nucleotides;Pyrimidines;Pyrimidine_utilization	0.999883	0.999985	2.30838e-05	0
Nucleosides and Nucleotides;Pyrimidines;Pyrimidine_utilization;Pyrimidine ABC transporter, ATP-binding protein	0.999883	0.999985	2.30838e-05	0
Secondary Metabolism;Biosynthesis of phenylpropanoids;Phenylpropionate_Degradation;3-phenylpropionate dioxygenase ferredoxin subunit	0.999883	0.999985	2.30838e-05	0
Carbohydrates;CO2 fixation;CO2_uptake,_carboxysome;Ribulose-1,5-bisphosphate carboxylase, Type III (EC 4.1.1.39)	0.999921	0.999985	2.16411e-05	0
Phages, Prophages, Transposable elements;Bacteriophage structural proteins;Phage_capsid_proteins;Phage capsid scaffolding protein	0.999921	0.999985	2.16411e-05	0
Carbohydrates;Central carbohydrate metabolism;Glycolysis_and_Gluconeogenesis;Fructose-bisphosphate aldolase, archaeal class I (EC 4.1.2.13)	0.999916	0.999985	2.01983e-05	0
Carbohydrates;Sugar alcohols;Inositol_catabolism;5-keto-2-deoxy-D-gluconate-6 phosphate aldolase [form 2] (EC 4.1.2.29)	0.999916	0.999985	2.01983e-05	0
RNA Metabolism;RNA processing and modification;tRNA_nucleotidyltransferase	0.999916	0.999985	2.01983e-05	0
RNA Metabolism;RNA processing and modification;tRNA_nucleotidyltransferase;tRNA nucleotidyltransferase, CC-adding (EC 2.7.7.21)	0.999916	0.999985	2.01983e-05	0
Virulence;Iron Scavenging Mechanisms;Iron_Scavenging_cluster_in_Thermus;Heme ABC transporter, permease protein HmuU	0.999916	0.999985	2.01983e-05	0
Membrane Transport;Potassium_homeostasis;Kef-type transport system 2 (probable substrate potassium), subunit 1	0.972009	0.999985	4.18394e-05	2.16909e-05
Cell Wall and Capsule;Capsular and extracellular polysacchrides;Rhamnose_containing_glycans;Capsular polysaccharide ABC transporter, permease protein KpsM	0.36339	0.576778	0.00030009	0.00028084
Carbohydrates;Aminosugars;N-Acetyl-Galactosamine_and_Galactosamine_Utilization;Tagatose-6-phosphate kinase AgaZ (EC 2.7.1.144)	0.34502	0.557276	3.17403e-05	1.25579e-05
Carbohydrates;Sugar alcohols;Glycerol_fermenation_to_1,3-propanediol;Glycerol dehydratase medium subunit (EC 4.2.1.30)	0.927515	0.999985	3.02975e-05	1.14163e-05
Clustering-based subsystems;CBSS-314269.3.peg.1840;Carbon-monoxide dehydrogenase form II, large subunit (EC 1.2.99.2)	0.999911	0.999985	1.87556e-05	0
Fatty Acids, Lipids, and Isoprenoids;Isoprenoids;Carotenoids;Regulator of carotenoid biosynthesis	0.999911	0.999985	1.87556e-05	0
Respiration;Electron accepting reactions;Anaerobic_respiratory_reductases;Sulfite reductase beta subunit (EC 1.8.99.1)	0.999911	0.999985	1.87556e-05	0
Respiration;Sodium Ion-Coupled Energetics;Na+_translocating_decarboxylases_and_related_biotin-dependent_enzymes;Oxaloacetate decarboxylase alpha chain (EC 4.1.1.3)	0.161712	0.336631	0.0285922	0.0285737
Clustering-based subsystems;Isoprenoid/cell wall biosynthesis: PREDICTED UNDECAPRENYL DIPHOSPHATE PHOSPHATASE;CBSS-83331.1.peg.3039;Stage V sporulation protein D (Sporulation-specific penicillin-binding protein)	0.558761	0.772511	0.000245266	0.000227183
Cofactors, Vitamins, Prosthetic Groups, Pigments;Molybdopterin_cytosine_dinucleotide;Periplasmic aromatic aldehyde oxidoreductase, FAD binding subunit YagS	0.905239	0.999985	0.000167358	0.000149553
Clustering-based subsystems;Cell Division;Cell_Division_Cluster	0.300111	0.507971	1.87556e-05	1.14163e-06
Clustering-based subsystems;Cell Division;Cell_Division_Cluster;Cell division protein YlmG/Ycf19 (putative), YggT family	0.300111	0.507971	1.87556e-05	1.14163e-06
Carbohydrates;Central carbohydrate metabolism;Ethylmalonyl-CoA_pathway_of_C2_assimilation;Acetoacetyl-CoA reductase (EC 1.1.1.36) of ethylmalonyl-CoA pathway	0.999904	0.999985	1.73129e-05	0
Carbohydrates;Di- and oligosaccharides;Sucrose_utilization;Sucrose permease, major facilitator superfamily	0.999904	0.999985	1.73129e-05	0
Clustering-based subsystems;Bacterial_Cell_Division;Cell division protein FtsJ	0.999904	0.999985	1.73129e-05	0
Metabolism of Aromatic Compounds;Salicylate_and_gentisate_catabolism;regulator protein,AreR	0.999904	0.999985	1.73129e-05	0
Protein Metabolism;Protein biosynthesis;Ribosome_LSU_eukaryotic_and_archaeal	0.779667	0.989104	8.07934e-05	6.3931e-05
Protein Metabolism;Protein biosynthesis;Ribosome_LSU_eukaryotic_and_archaeal;LSU ribosomal protein L7Ae	0.779667	0.989104	8.07934e-05	6.3931e-05
Clustering-based subsystems;YidC_containing_cluster_in_LSU_rRNA_proximity	0.471932	0.679561	0.00115708	0.00114048
Clustering-based subsystems;YidC_containing_cluster_in_LSU_rRNA_proximity;FIG134306: Universal stress protein UspA	0.471932	0.679561	0.00115708	0.00114048
Clustering-based subsystems;EC699-706;Deoxyribodipyrimidine photolyase, type II (EC 4.1.99.3)	0.378752	0.592608	0.000336158	0.000319655
Cofactors, Vitamins, Prosthetic Groups, Pigments;Quinone cofactors;Menaquinone_Biosynthesis_via_Futalosine_--_gjo;Menaquinone via futalosine step 4, possible alternative	0.0429159	0.129482	2.88548e-05	1.25579e-05
Stress Response;Osmotic stress;Choline_and_Betaine_Uptake_and_Betaine_Biosynthesis;Choline ABC transport system, ATP-binding protein OpuBA	0.107271	0.252822	0.00043715	0.00042126
Cofactors, Vitamins, Prosthetic Groups, Pigments;Folate and pterines;Pterin_metabolism_3	0.999896	0.999985	1.58701e-05	0
Cofactors, Vitamins, Prosthetic Groups, Pigments;Folate and pterines;Pterin_metabolism_3;COGs COG3146	0.999896	0.999985	1.58701e-05	0
Carbohydrates;Monosaccharides;L-Arabinose_utilization;L-2-keto-3-deoxyarabonate dehydratase (EC 4.2.1.43)	0.332375	0.545316	3.60685e-05	2.05493e-05
Respiration;Electron accepting reactions;Ubiquinone_Menaquinone-cytochrome_c_reductase_complexes;ubiquinol cytochrome C oxidoreductase, cytochrome C1 subunit	0.976815	0.999985	3.60685e-05	2.05493e-05
Protein Metabolism;Protein biosynthesis;Translation_elongation_factor_G_family;Ribosome protection-type tetracycline resistance related proteins	0.999886	0.999985	1.44274e-05	0
Virulence;Type III, Type IV, Type VI, ESAT secretion systems;Type_4_conjugative_transfer_system,_IncI1_type;IncI1 plasmid conjugative transfer protein PilL	0.999886	0.999985	1.44274e-05	0
Dormancy and Sporulation;Exosporium	0.928115	0.999985	2.45266e-05	1.02746e-05
Dormancy and Sporulation;Exosporium;Outer spore coat protein E	0.928115	0.999985	2.45266e-05	1.02746e-05
Virulence;Ton_and_Tol_transport_systems;Colicin I receptor precursor	0.312076	0.523284	0.000888727	0.000874485
Respiration;Cytochrome_B6-F_complex	0.999874	0.999985	1.29847e-05	0
Respiration;Cytochrome_B6-F_complex;Cytochrome b6-f complex iron-sulfur subunit PetC1 (Rieske iron sulfur protein EC 1.10.99.1)	0.999874	0.999985	1.29847e-05	0
Virulence;Streptococcus_pyogenes_Virulome;Hyaluronan synthase (EC 2.4.1.212)	0.919445	0.999985	2.16411e-05	9.133e-06
Amino Acids and Derivatives;Aromatic amino acids and derivatives;Chorismate:_Intermediate_for_synthesis_of_PAPA_antibiotics,_PABA,_anthranilate,_3-hydroxyanthranilate_and_more.;Isochorismate pyruvate-lyase (EC 4.-.-.-)	0.999857	0.999985	1.15419e-05	0
Cell Wall and Capsule;Gram-Negative cell wall components;Vibrio_Core_Oligosaccharide_Biosynthesis;Nucleoside-diphosphate-sugar pyrophosphorylase involved in lipopolysaccharide biosynthesis/translation initiation factor 2B, gamma/epsilon subunits (eIF-2Bgamma/eIF-2Bepsilon)	0.999857	0.999985	1.15419e-05	0
Phages, Prophages, Transposable elements;Bacteriophage integration/excision/lysogeny;Phage_integration_and_excision;Site-specific tyrosine recombinase	0.999857	0.999985	1.15419e-05	0
Amino Acids and Derivatives;Aromatic amino acids and derivatives;Phenylalanine_and_Tyrosine_Branches_from_Chorismate;Periplasmic aromatic amino acid aminotransferase beta precursor (EC 2.6.1.57)	0.2415	0.446675	0.000399639	0.000388153
Nucleosides and Nucleotides;Detoxification;Nudix_proteins_(nucleoside_triphosphate_hydrolases);Thiamin-phosphate pyrophosphorylase-like protein	0.280383	0.491116	0.00120757	0.00119642
Amino Acids and Derivatives;Lysine, threonine, methionine, and cysteine;Cysteine_Biosynthesis;Sulfate permease	0.300017	0.507971	0.0233652	0.0233542
Metabolism of Aromatic Compounds;Peripheral pathways for catabolism of aromatic compounds;Benzoate_degradation;1,2-dihydroxycyclohexa-3,5-diene-1-carboxylate dehydrogenase (EC 1.3.1.25)	0.592387	0.804835	0.00124797	0.00123752
Virulence;Resistance to antibiotics and toxic compounds;Cobalt-zinc-cadmium_resistance;Cation efflux system protein CusF precursor	0.222387	0.422909	7.64652e-05	6.62143e-05
Amino Acids and Derivatives;Branched-chain amino acids;Branched_chain_amino_acid_degradation_regulons;Methylglutaconyl-CoA hydratase (EC 4.2.1.18)	0.999835	0.999985	1.00992e-05	0
Cofactors, Vitamins, Prosthetic Groups, Pigments;Tetrapyrroles;Coenzyme_B12_biosynthesis;Sirohydrochlorin cobaltochelatase (EC 4.99.1.3)	0.999835	0.999985	1.00992e-05	0
Nucleosides and Nucleotides;Hydantoin_metabolism;D-hydantoinase (EC 3.5.2.2)	0.999835	0.999985	1.00992e-05	0
Sulfur Metabolism;Organic sulfur assimilation;Utilization_of_glutathione_as_a_sulphur_source	0.999835	0.999985	1.00992e-05	0
Sulfur Metabolism;Organic sulfur assimilation;Utilization_of_glutathione_as_a_sulphur_source;Putative glutathione transporter, permease component	0.999835	0.999985	1.00992e-05	0
Virulence;Resistance to antibiotics and toxic compounds;USS-DB-2	0.999835	0.999985	1.00992e-05	0
Virulence;Resistance to antibiotics and toxic compounds;USS-DB-2;Response regulator, ompR family [USSDB2A]	0.999835	0.999985	1.00992e-05	0
Metabolism of Aromatic Compounds;Metabolism of central aromatic intermediates;Homogentisate_pathway_of_aromatic_compound_degradation;Transcriptional regulator, IclR family	0.705573	0.915011	0.000113976	0.00010503
Clustering-based subsystems;Cytochrome biogenesis;CBSS-196164.1.peg.461;Glutamate-1-semialdehyde aminotransferase (EC 5.4.3.8)	0.35086	0.563396	0.00564399	0.00563506
Amino Acids and Derivatives;Branched-chain amino acids;Branched_chain_amino_acid_degradation_regulons;Isovaleryl-CoA dehydrogenase (EC 1.3.99.10)	0.999802	0.999985	8.65643e-06	0
Clustering-based subsystems;Glutaredoxin_3_containing_cluster_2;Glutaredoxin 3 (Grx2)	0.999802	0.999985	8.65643e-06	0
Cofactors, Vitamins, Prosthetic Groups, Pigments;Folate and pterines;Molybdenum_cofactor_biosynthesis;Molybdopterin biosynthesis protein MoeB	0.998332	0.999985	8.65643e-06	0
Membrane Transport;Uni- Sym- and Antiporters;Sodium_Hydrogen_Antiporter;Na(+) H(+) antiporter subunit G (TC 2.A.63.1.2)	0.999802	0.999985	8.65643e-06	0
Sulfur Metabolism;Organic sulfur assimilation;Taurine_Utilization;Taurine transporter substrate-binding protein	0.18565	0.373017	0.000150045	0.000141562
Carbohydrates;Di- and oligosaccharides;Beta-Glucoside_Metabolism;PTS system, beta-glucoside-specific IIB component (EC 2.7.1.69)	0.997327	0.999985	3.46257e-05	2.62574e-05
Sulfur Metabolism;Inorganic sulfur assimilation;Inorganic_Sulfur_Assimilation;Ferredoxin--sulfite reductase, actinobacterial type (EC 1.8.7.1)	0.0732866	0.190595	4.47249e-05	3.6532e-05
Respiration;Electron donating reactions;Formate_dehydrogenase;Formate dehydrogenase alpha subunit (EC 1.2.1.2)	0.296833	0.505089	4.90531e-05	4.10985e-05
Amino Acids and Derivatives;Lysine, threonine, methionine, and cysteine;Lysine_degradation;Beta-lysine acetyltransferase (EC 2.3.1.-)	0.999837	0.999985	7.21369e-06	0
Clustering-based subsystems;Ycd_cluster_(_putative_2-hydroxyacid_dehydrogenase_)	0.999837	0.999985	7.21369e-06	0
Clustering-based subsystems;Ycd_cluster_(_putative_2-hydroxyacid_dehydrogenase_);Putative 2-hydroxyacid dehydrogenase YcdW (EC 1.-.-.-)	0.999837	0.999985	7.21369e-06	0
Respiration;Reverse electron transport;Archaeal_membrane_bound_hydrogenases;Energy conserving hydrogenase Ehb large subunit (protein N)	0.999837	0.999985	7.21369e-06	0
Virulence;Iron Scavenging Mechanisms;Iron(III)_dicitrate_transport_system_Fec;Iron(III) dicitrate transport system permease protein FecD (TC 3.A.1.14.1)	0.999837	0.999985	7.21369e-06	0
RNA Metabolism;RNA processing and modification;tRNA_processing;5-carboxymethyl uridine and 5-carboxymethyl 2-thiouridine methyltransferase	0.468131	0.67647	0.000196213	0.00018951
Amino Acids and Derivatives;Lysine, threonine, methionine, and cysteine;Methionine_Salvage;5-methylthioribose kinase (EC 2.7.1.100)	0.865129	0.999985	0.000481875	0.000476058
Clustering-based subsystems;CBSS-193567.1.peg.90	0.999757	0.999985	5.77096e-06	0
Clustering-based subsystems;CBSS-193567.1.peg.90;FIG107367: Single-stranded DNA-binding protein	0.999757	0.999985	5.77096e-06	0
Clustering-based subsystems;Cell_wall_related_cluster;FIG123464: Polysaccharide export protein	0.999757	0.999985	5.77096e-06	0
Clustering-based subsystems;Shiga toxin cluster;CBSS-194948.1.peg.143;similar bacteriphage P22 ninH	0.999757	0.999985	5.77096e-06	0
Membrane Transport;Uni- Sym- and Antiporters;Sodium_Hydrogen_Antiporter;Na(+) H(+) antiporter subunit A (TC 2.A.63.1.2)	0.993387	0.999985	2.16411e-05	1.59828e-05
Amino Acids and Derivatives;Lysine, threonine, methionine, and cysteine;Methionine_Salvage;Glutamine-dependent 2-keto-4-methylthiobutyrate transaminase	0.993783	0.999985	7.06942e-05	6.50727e-05
Carbohydrates;CO2 fixation;CO2_uptake,_carboxysome;putative carboxysome peptide A	0.999431	0.999985	4.32822e-06	0
Virulence;Iron Scavenging Mechanisms;Heme,_hemin_uptake_and_utilization_systems_in_GramPositives;Heme ABC type transporter HtsABC, permease protein HtsB	0.984413	0.999985	1.44274e-05	1.02746e-05
Amino Acids and Derivatives;Aromatic amino acids and derivatives;Phenylalanine_and_Tyrosine_Branches_from_Chorismate;Chorismate mutase II (EC 5.4.99.5)	0.361827	0.575937	1.73129e-05	1.36995e-05
Amino Acids and Derivatives;Arginine; urea cycle, polyamines;Urea_decomposition;Urease beta subunit (EC 3.5.1.5)	0.251499	0.460086	3.8954e-05	3.53904e-05
Membrane Transport;ABC transporters;Periplasmic-Binding-Protein-Dependent_Transport_System_for_&#945;-Glucosides;ABC alpha-glucoside transporter, inner membrane subunit AglF	0.999985	0.999985	1.44274e-05	1.14163e-05
Metabolism of Aromatic Compounds;Benzoate_transport_and_degradation_cluster;Benzoate transport, ATPase component	0.999177	0.999985	2.88548e-06	0
Virulence;Resistance to antibiotics and toxic compounds;Methicillin_resistance_in_Staphylococci;RNA polymerase sigma factor SigB	0.378986	0.592726	0.0010835	0.00108112
Virulence;Iron Scavenging Mechanisms;Campylobacter_Iron_Metabolism;Peroxide stress regulator	0.57603	0.788006	0.0029706	0.00296823
Clustering-based subsystems;EC49-61;Organic solvent tolerance protein precursor	0.530333	0.740389	0.0300941	0.0300921
Carbohydrates;Monosaccharides;Fructose_utilization;Fructose-specific phosphocarrier protein HPr (EC 2.7.1.69)	0.202325	0.396544	0.00228963	0.00228782
Virulence;Resistance to antibiotics and toxic compounds;Methicillin_resistance_in_Staphylococci;HmrB protein involved in methicillin resistance	0.80547	0.999985	3.46257e-05	3.31071e-05
Virulence;Quorum sensing and biofilm formation;Acyl_Homoserine_Lactone_(AHL)_Autoinducer_Quorum_Sensing_	0.999984	0.999985	7.21369e-06	5.70813e-06
Virulence;Quorum sensing and biofilm formation;Acyl_Homoserine_Lactone_(AHL)_Autoinducer_Quorum_Sensing_;Transcriptional regulator RhlR	0.999984	0.999985	7.21369e-06	5.70813e-06
Membrane Transport;Uni- Sym- and Antiporters;Sodium_Hydrogen_Antiporter;Na(+) H(+) antiporter subunit D	0.450083	0.656947	0.000940666	0.000939558
Cofactors, Vitamins, Prosthetic Groups, Pigments;Tetrapyrroles;Cobalamin_synthesis;Cobyric acid synthase	0.0601637	0.167162	0.0165121	0.0165113
Cofactors, Vitamins, Prosthetic Groups, Pigments;Tetrapyrroles;Heme_and_Siroheme_Biosynthesis;Coproporphyrinogen III oxidase, oxygen-independent (EC 1.3.99.22), divergent, putative 2	0.362266	0.576182	4.76104e-05	4.68066e-05
Cell Wall and Capsule;Gram-Negative cell wall components;Lipid_A-Ara4N_pathway_(_Polymyxin_resistance_)	0.778032	0.987962	0.000418394	0.000417835
DNA Metabolism;DNA uptake, competence;Gram_Positive_Competence;late competence protein ComGC, access of DNA to ComEA	0.948636	0.999985	3.46257e-05	3.42488e-05
# Total reads	0.039073	0.120121	100	100
Carbohydrates;Organic acids;Isobutyryl-CoA_to_Propionyl-CoA_Module;Enoyl-CoA hydratase [valine degradation] (EC 4.2.1.17)	0.953469	0.999985	1.00992e-05	1.02746e-05
Membrane Transport;Tricarboxylate transport;Tricarboxylate_transport_system;Tricarboxylate transport sensor protein TctE	0.440323	0.64693	2.01983e-05	2.05493e-05
Carbohydrates;Monosaccharides;L-fucose_utilization_temp;2-keto-3-deoxy-L-fuconate dehydrogenase	0.809281	0.999985	0.000145717	0.000146128
Membrane Transport;ECF_class_transporters;Substrate-specific component NiaX of predicted niacin ECF transporter	0.321864	0.533299	0.000134175	0.000134712
Clustering-based subsystems;Conserved_cluster_around_acetyltransferase_YpeA_in_Enterobacteria;Acetyltransferase YpeA	0.0832084	0.209875	0.00166348	0.00166449
Clustering-based subsystems;Two related proteases;CBSS-257314.1.peg.676;Unspecified monosaccharide ABC transport system, permease component Ia (FIG025991)	0.943437	0.999985	1.73129e-05	1.94076e-05
Carbohydrates;CO2 fixation;CO2_uptake,_carboxysome;Carboxysome protein CcmM	0.224794	0.42455	5.77096e-06	7.99138e-06
Respiration;Electron accepting reactions;Ubiquinone_Menaquinone-cytochrome_c_reductase_complexes;Ubiquinol--cytochrome c reductase, cytochrome B subunit (EC 1.10.2.2)	0.999018	0.999985	0	2.28325e-06
Virulence;Type III, Type IV, Type VI, ESAT secretion systems;Toxin_co-regulated_pilus;TCP pilus virulence regulatory protein ToxT, transcription activator	0.999018	0.999985	0	2.28325e-06
Cofactors, Vitamins, Prosthetic Groups, Pigments;Tetrapyrroles;Bilin_Biosynthesis	0.294088	0.502639	1.87556e-05	2.16909e-05
Cofactors, Vitamins, Prosthetic Groups, Pigments;Tetrapyrroles;Bilin_Biosynthesis;Phycocyanobilin lyase alpha subunit	0.294088	0.502639	1.87556e-05	2.16909e-05
RNA Metabolism;RNA processing and modification;Queuosine-Archaeosine_Biosynthesis;preQ1-regulated inosine-uridine nucleoside hydrolase (EC 3.2.2.1)	0.667094	0.876629	0.0011614	0.00116446
Respiration;Electron accepting reactions;Anaerobic_respiratory_reductases;Sulfite reductase alpha subunit (EC 1.8.99.1)	0.796578	0.999985	5.77096e-06	9.133e-06
Amino Acids and Derivatives;Glutamine, glutamate, aspartate, asparagine; ammonia assimilation;Glutamine,_Glutamate,_Aspartate_and_Asparagine_Biosynthesis;glutamine synthetase family protein	0.999014	0.999985	0	3.42488e-06
Amino Acids and Derivatives;Histidine Metabolism;Histidine_Degradation;N-formylglutamate deformylase (EC 3.5.1.68)	0.999014	0.999985	0	3.42488e-06
[truncated: 1,850 more rows]
