# Supplementary material for: Gut Microbiome Metagenomics Analysis Suggests a Functional Model for the Development of Autoimmunity for Type 1 Diabetes
Source: PLoS One. 2011 Oct 17;6(10):e25792. doi: 10.1371/journal.pone.0025792 (PMC3197175; doi:10.1371/journal.pone.0025792)
Supplement: Supporting Dataset S3 — The results of 16S rRNA mining from the metagenomic data. All six levels of taxonomic discrimination are listed with the level of statistical difference between cases and controls for each taxon. Data are listed as a % of all 16S rRNA reads mined from the metagenomic data. (XLSX) [file pone.0025792.s006.xlsx]

## Sheet: phylum met
	case1	case2	case3	case4	control1	control2	control3	control4		O.T.U.	pvalue_pairs	qvalues	% Cases	% Controls	Cases-Controls
Acidobacteria	0	1	0	0	0	2	1	3		Acidobacteria	0.2547	0.0444444	0.000833132	0.0034711	-0.00263797
Actinobacteria	356	177	253	829	50	38	325	337		Actinobacteria	0	0.0138889	1.34551	0.433887	0.911621
Aquificae	0	0	0	0	0	0	1	1		Aquificae	NA	10	0	0.00115703	-0.00115703
Bacteroidetes	13403	24229	13642	12280	13192	18395	30093	20456		Bacteroidetes	0	0.00277778	52.9489	47.517	5.43186
Chlamydiae	0	0	0	0	1	0	3	0		Chlamydiae	NA	10	0	0.00231406	-0.00231406
Chlorobi	0	1	0	1	1	0	3	1		Chlorobi	0.7075	0.0361111	0.00166626	0.00289258	-0.00122632
Chloroflexi	0	0	0	0	0	0	10	0		Chloroflexi	NA	10	0	0.00578516	-0.00578516
Cyanobacteria	6	6	10	2	11	8	35	69		Cyanobacteria	0	0.025	0.0199952	0.0711575	-0.0511623
Deinococcus-Thermus	1	0	0	0	1	0	3	3		Deinococcus-Thermus	0.153	0.0416667	0.000833132	0.00404961	-0.00321648
Euryarchaeota	10	11	2	1	11	1	4	11		Euryarchaeota	0.3984	0.0194444	0.0199952	0.0156199	0.00437523
Fibrobacteres	0	0	1	0	1	0	0	0		Fibrobacteres	1	0.0472222	0.000833132	0.000578516	0.000254616
Firmicutes	6730	4613	19621	10757	12804	17338	24825	19129		Firmicutes	0	0.00555556	34.7591	42.8657	-8.10664
Fusobacteria	39	2	285	4	80	294	448	411		Fusobacteria	0	0.0166667	0.274934	0.713311	-0.438377
Ktedonobacteria	0	0	0	0	0	0	0	1		Ktedonobacteria	NA	10	0	0.000578516	-0.000578516
Lentisphaerae	5	0	0	0	0	0	0	0		Lentisphaerae	0.0126	0.0333333	0.00416566	0	0.00416566
Planctomycetes	0	0	0	0	0	0	0	1		Planctomycetes	NA	10	0	0.000578516	-0.000578516
Proteobacteria	2107	1630	4402	2718	1286	1364	5185	2126		Proteobacteria	0	0.00833333	9.04531	5.7626	3.28271
Spirochaetes	7	3	5	1	1	5	5	32		Spirochaetes	0.0333	0.0277778	0.0133301	0.0248762	-0.0115461
Synergistetes	1	0	1	0	0	0	1	2		Synergistetes	1	0.0388889	0.00166626	0.00173555	-6.92847e-05
Tenericutes	425	553	545	303	343	584	1434	874		Tenericutes	0	0.0111111	1.5213	1.8715	-0.350201
Thermotogae	15	2	1	2	3	0	14	23		Thermotogae	0.2404	0.0222222	0.0166626	0.0231406	-0.00647801
Unclassified	5	10	4	1	2	5	7	2		Unclassified	0.0898	0.05	0.0166626	0.00925626	0.00740638
Verrucomicrobia	8	0	2	0	0	0	16	1140		Verrucomicrobia	0	0.0305556	0.00833132	0.668765	-0.660433
Total	23118	31238	38774	26899	27787	38034	62413	44622

## Sheet: Species summary
O.T.U.	pvalue_pairs	qvalues	% Cases	% Controls
Bacteroides_fragilis	0	2.59471e-05	5.22874	1.4029
UNCLASSIFIED	0	0.05	46.4879	42.9392
Bacteroides_thetaiotaomicron	0	5.18941e-05	4.36061	1.58918
Bacteroides_uniformis	0	7.78412e-05	2.067	1.21315
Bacteroides_acidifaciens	0	0.000207577	1.16305	0.340168
Escherichia_coli	0	0.000233524	0.754818	0.0173555
Ruminococcus_flavefaciens	0	0.000259471	0.681502	0.143472
Bacteroides_pyogenes	0	0.0004411	0.615685	0.248183
Bacteroides_ovatus	0	0.000129735	1.67126	1.33348
Bacteroides_dorei	0	0.000181629	1.08057	0.786782
bacterium_ic1292	0	0.000726518	0.299928	0.0161985
Bacteroides_xylanisolvens	0	0.000752465	0.278266	0.0156199
Streptococcus_thermophilus	0	0.000544888	0.318256	0.0561161
Clostridium_indolis	0	0.00062273	0.317423	0.0838849
Bacteroidaceae_bacterium_Smarlab_3301643	0	0.000856253	0.237443	0.0109918
Clostridiaceae_bacterium_LEMV63	0	0.000674624	0.325755	0.112232
Lachnospiraceae_bacterium_DJF_VR44	0	0.000648677	0.348249	0.140579
Bacteroides_sp._XB44A	0	0.0008822	0.275767	0.0682649
Bacteroides_sp._Smarlab_3301643	0	0.000804359	0.294096	0.103554
Ruminococcus_bromii	0	0.00116762	0.232444	0.054959
Bacteroides_sp._265d	0	0.00127141	0.188288	0.0144629
Bacteroides_eggerthii	0	0.000908147	0.230778	0.0584301
Bifidobacterium_longum	0	0.00106383	0.183289	0.0121488
Bacteroides_sp._CO11	0	0.00129735	0.194953	0.0306614
Bacteroides_suis	0	0.000830306	0.227445	0.0734716
butyrate-producing_bacterium_SSC/2	0	0.00137519	0.147464	0.00867774
Eubacterium_tortuosum	0	0.000778412	0.241608	0.104133
Bacteroides_intestinalis	0	0.000596783	0.297428	0.163142
Haemophilus_influenzae	0	0.00207577	0.148297	0.0225621
Ruminococcus_sp._DJF_VR67	0	0.000934094	0.192453	0.0676864
Salmonella_enterica	0	0.00212766	0.112473	0.00115703
bacterium_mpn-isolate_group_5	0	0.00215361	0.119138	0.00925626
Bacteroides_sp._4072	0	0.00160872	0.143299	0.0399176
Bacteroides_sp._HB5	0	0.00233524	0.10914	0.00578516
Coprococcus_catus	0	0.00142709	0.192453	0.08967
Cronobacter_sakazakii	0	0.00225739	0.108307	0.00636368
Bacteroides_coprosuis	0	0.00197198	0.128302	0.0283473
Bacteroides_sp._C35	0	0.00147898	0.173291	0.0740501
Eubacterium_eligens	0.0005	0.000467047	0.609019	0.51083
Haemophilus_parainfluenzae	0	0.00275039	0.109973	0.0121488
Oligella_sp._PB2-1	0	0.000700571	0.217447	0.119753
Bacteroides_sp._7853	0	0.00179035	0.125803	0.0300828
Eubacterium_saphenum	0	0.00168656	0.127469	0.0323969
Bacteroides_sp._WH2	0	0.00163467	0.154963	0.0607442
Clostridium_lactatifermentans	0	0.00150493	0.146631	0.052645
Eubacterium_saburreum	0	0.00173845	0.12497	0.0318184
Clostridiaceae_bacterium_bSSV31	0	0.0017644	0.12497	0.0323969
Bacteroides_propionicifaciens	0	0.00204982	0.137467	0.0468598
Bifidobacterium_breve	0	0.00243902	0.0999758	0.00983478
Bacteroidaceae_bacterium_DJF_B220	0	0.00288012	0.0941439	0.00462813
Bacteroides_sp._XO77B42	0	0.00145304	0.128302	0.0393391
Bacteroides_sp._WH302	0	0.00186819	0.146631	0.0619012
Bacteroides_denticanum	0	0.00121951	0.173291	0.0914056
Bacteroides_sp._CS19	0	0.00303581	0.0991427	0.0185125
Bacteroides_massiliensis	0	0.00134925	0.17829	0.0977692
bacterium_ic1258	0	0.00181629	0.147464	0.071736
Bacteroides_sp._AR20	0	0.0022055	0.104141	0.0289258
Clostridium_bifermentans	0	0.00262065	0.0991427	0.0260332
Bacteroides_stercoris	0	0.00184224	0.104975	0.0329754
bacterium_ic1214	0	0.00326933	0.0774813	0.00578516
Alistipes_onderdonkii	0	0.00114167	0.152463	0.0809923
Ruminococcus_sp._CB3	0	0.00166061	0.126636	0.0561161
Ruminococcus_gnavus	0	0.00153088	0.146631	0.0763641
Bacteroides_sp._CIP103040	0	0.00171251	0.139133	0.0740501
Shigella_flexneri	0	0.00371043	0.0666506	0.00231406
Clostridiales_bacterium_L2-14	0	0.00280228	0.107474	0.0485954
Clostridium_sp._MDA2315	0	0.00363259	0.0666506	0.00809923
Shigella_boydii	0	0.00415153	0.0583192	0
Bacteroides_salyersiae	0	0.00210171	0.107474	0.0491739
Bacteroides_sp._CJ89	0	0.00407369	0.0574861	0.00231406
Clostridium_innocuum	0	0.00192008	0.127469	0.072893
Bacteroides_sp._WH305	0	0.00251687	0.0916445	0.0376036
Terrahaemophilus_aromaticivorans	0	0.0035807	0.0833132	0.0295043
Veillonella_parvula	0	0.00332122	0.0641512	0.0104133
Prevotella_sp._cp02.11	0	0.00324338	0.0741487	0.0214051
Dehalobacterium_formicoaceticum	0	0.00347691	0.06915	0.0185125
Bifidobacterium_adolescentis	0	0.00384017	0.0558198	0.00636368
Clostridium_sp._FL2	0	0.00376232	0.0649843	0.0156199
Bifidobacterium_animalis	0	0.0040218	0.0541536	0.00636368
Ruminococcus_sp._END-1	0	0.00360664	0.0616518	0.0138844
Roseburia_inulinivorans	0.0017	0.00124546	0.185788	0.138265
Coprobacillus_cateniformis	0	0.00399585	0.0541536	0.00752071
bacterium_mpn-isolate_group_27	0	0.00451479	0.0591524	0.0144629
Streptococcus_salivarius	0	0.00448884	0.0491548	0.00462813
Bacteroides_sp._35AE37	0	0.00254281	0.075815	0.0323969
Roseburia_sp._DJF_VR77	0.0012	0.00202387	0.146631	0.103554
human_intestinal_firmicute_CO35	0	0.00480021	0.0516542	0.00925626
Solobacterium_moorei	0	0.00381422	0.0799807	0.0376036
Bacteroides_tectus	0	0.0031396	0.0791475	0.037025
Haemophilus_haemolyticus	0	0.004904	0.0491548	0.00809923
Veillonella_dispar	0	0.00435911	0.0458223	0.00520665
Shigella_sonnei	0	0.0048521	0.0416566	0.00115703
Bacteroides_sp._35BE34	0	0.00293202	0.0683168	0.0306614
Firmicutes_bacterium_EG14	0	0.00316554	0.0774813	0.0399176
Clostridium_sp._CJ23	0	0.0044629	0.044156	0.00694219
Haemophilus_parasuis	0	0.00531915	0.044156	0.00694219
Ruminococcus_sp._DJF_VR87	0.0002	0.00246497	0.0908114	0.053802
Clostridium_ramosum	0.0002	0.00249092	0.0891451	0.052645
Eubacterium_limosum	0	0.00311365	0.0716494	0.0352895
Bacteroides_sp._35BE35	0	0.00321744	0.0591524	0.0237192
bacterium_'New_Zealand_B'	0	0.00306175	0.0683168	0.0329754
Bacteroides_sp._35AE31	0.0001	0.00267255	0.0749819	0.0399176
Clostridium_piliforme	0	0.00373638	0.063318	0.0283473
Alistipes_putredinis	0	0.00428127	0.0424897	0.00752071
Bacteroides_graminisolvens	0	0.00513752	0.0358247	0.00115703
Lactobacillales_bacterium_DJF_B280	0	0.00425532	0.0474885	0.0133059
rumen_bacterium_R-7	0.0001	0.00319149	0.0708162	0.0376036
Bifidobacterium_bifidum	0	0.00518941	0.0366578	0.00520665
Eubacterium_cf._saburreum_oral_strain_C27KA	0.0001	0.00461858	0.0558198	0.0260332
Bacteroides_helcogenes	0.0001	0.00412558	0.0549867	0.0254547
segmented_filamentous_bacterium	0.0008	0.00350285	0.0699831	0.0404961
butyrate-producing_bacterium_T2-132	0.0001	0.0039699	0.0558198	0.0266117
Sutterella_morbirenis	0	0.00537104	0.0374909	0.00925626
mastodon_intestinal_bacterium_AN-22-6	0	0.00482615	0.0391572	0.0109918
bovine_rumen_bacterium_JPR13	0	0.00521536	0.0341584	0.00694219
Pantoea_agglomerans	0	0.00612351	0.0283265	0.00231406
Clostridiales_bacterium_AHT16	0	0.00503373	0.0366578	0.0109918
Shigella_dysenteriae	0	0.00594188	0.0266602	0.00173555
butyrate-producing_bacterium_SR1/1	0.0004	0.00472237	0.044156	0.0202481
Ruminococcus_sp._DJF_VR66	0.0008	0.00438505	0.0474885	0.0237192
Lachnospiraceae_bacterium_A2	0.0006	0.00526725	0.044156	0.0208266
Lachnospiraceae_bacterium_DJF_VP18k1	0.0004	0.00498184	0.0408235	0.017934
Clostridium_sp._MLG856-1	0.0001	0.00500778	0.0366578	0.0138844
Desulfotomaculum_sp._CYP9	0.0002	0.00552673	0.0383241	0.0156199
Enterobacter_hormaechei	0	0.00656461	0.0216614	0.000578516
Veillonella_atypica	0	0.00638298	0.0233277	0.00231406
Ruminococcus_sp._16442	0.0025	0.00456668	0.0424897	0.0219836
Escherichia_fergusonii	0	0.00726518	0.0199952	0
Ruminococcus_sp._NML_00-0124	0.0018	0.00495589	0.0366578	0.0173555
Parasporobacterium_paucivorans	0.0004	0.00542294	0.0299928	0.0109918
bacterium_ic1311	0.0051	0.00492994	0.0408235	0.0219836
Haemophilus_ducreyi	0	0.00770628	0.0216614	0.00289258
Aggregatibacter_aphrophilus	0	0.0084328	0.019162	0.000578516
Ruminococcus_sp._5	0	0.00609756	0.0233277	0.00520665
Bacteroides_sp._CO58	0.0003	0.00620135	0.0258271	0.00809923
Bifidobacterium_pseudolongum	0	0.00648677	0.0216614	0.00404961
Haemophilus_haemoglobinophilus	0.0001	0.00742086	0.0233277	0.00578516
Elbe_River_snow_isolate_9_3	0.001	0.00588998	0.0274934	0.0104133
Eggerthella_lenta	0.0103	0.00508563	0.0383241	0.0214051
Klebsiella_pneumoniae	0	0.00762844	0.0166626	0
Bifidobacterium_pseudocatenulatum	0.0001	0.0066684	0.0216614	0.00520665
Eubacterium_sp._CB4	0.0042	0.0057862	0.0308259	0.0144629
swine_fecal_bacterium_FPC70	0.0007	0.00614946	0.0241608	0.00809923
Streptococcus_sp._M40	0	0.00744681	0.0166626	0.00115703
Clostridium_ruminantium	0.0005	0.00718734	0.0216614	0.00636368
Citrobacter_freundii	0	0.0079917	0.0158295	0.000578516
Streptococcus_parasanguinis	0.0001	0.0071095	0.019162	0.00404961
Ruminococcus_sp._CO47	0	0.00781007	0.0149964	0
Clostridium_sordellii	0	0.00814738	0.0166626	0.00173555
Serratia_marcescens	0	0.00848469	0.0158295	0.00115703
Clostridium_glycolicum	0.0094	0.00599377	0.0283265	0.0138844
butyrate-producing_bacterium_SL6/1/1	0.0001	0.00760249	0.0183289	0.00404961
bacterium_G100VIII	0.0006	0.0070576	0.0199952	0.00578516
Aggregatibacter_actinomycetemcomitans	0	0.00996367	0.0141632	0
Aggregatibacter_segnis	0	0.00998962	0.0141632	0
Bifidobacterium_dentium	0.0001	0.00736897	0.0166626	0.00289258
Actinobacillus_pleuropneumoniae	0	0.0097561	0.0141632	0.000578516
Coconut_lethal_yellowing_phytoplasma	0.0096	0.0062273	0.024994	0.0115703
bacterium_mpn-isolate_group_19	0.0096	0.00635703	0.024994	0.0115703
Enterobacter_cloacae	0.0001	0.00864037	0.0149964	0.00173555
Streptococcus_pneumoniae	0.0003	0.0079398	0.0166626	0.0034711
Bifidobacterium_sp._h12	0	0.0083809	0.0133301	0.000578516
Bifidobacterium_indicum	0	0.00866632	0.0133301	0.000578516
Alcaligenes_faecalis	0.0001	0.00900363	0.0133301	0.00115703
Clostridium_sp._SC1013	0.0013	0.00773223	0.0166626	0.00462813
Clostridium_sp._NB2	0.0013	0.00822522	0.0166626	0.00462813
Alistipes_sp._DJF_B185	0	0.00791386	0.012497	0.000578516
Bacteroides_sp._111	0	0.00947068	0.012497	0.000578516
Bifidobacterium_subtile	0.0003	0.00918526	0.012497	0.00173555
Actinobacillus_porcinus	0.0002	0.0105086	0.0116638	0.00115703
Ruminococcus_sp._C36	0.0014	0.00879606	0.0133301	0.00289258
Klebsiella_oxytoca	0	0.0105605	0.00999758	0
Clostridium_sp._CM-C99	0.0095	0.00915931	0.0149964	0.00520665
butyrate-producing_bacterium_Ph07AW01	0.002	0.00939284	0.0116638	0.00231406
Streptococcus_pyogenes	0.0066	0.00908147	0.0133301	0.00404961
Clostridium_sp._U42	0.0016	0.00934094	0.0108307	0.00173555
Pectobacterium_carotovorum	0.0019	0.00983394	0.0108307	0.00173555
Ruminococcus_callidus	0.0004	0.0104567	0.00916445	0.000578516
Bifidobacterium_asteroides	0.0005	0.0103269	0.00916445	0.000578516
Bifidobacterium_coryneforme	0.0001	0.0106902	0.00833132	0
Pasteurella_multocida	0.0016	0.0124546	0.00916445	0.00115703
Streptococcus_agalactiae	0.0076	0.0100675	0.0108307	0.00289258
Actinobacillus_rossii	0.0077	0.011261	0.0108307	0.00289258
Enterobacter_aerogenes	0.0009	0.0119097	0.00833132	0.000578516
Peptostreptococcus_anaerobius	0.0009	0.0120654	0.00833132	0.000578516
Collinsella_intestinalis	0.0087	0.0106124	0.00999758	0.00231406
butyrate-producing_bacterium_Ph07AY04	0.0093	0.0109756	0.00999758	0.00231406
Cronobacter_muytjensii	0.0004	0.0119875	0.00749819	0
Streptococcus_anginosus	0.0031	0.0115205	0.00833132	0.00115703
Ruminococcus_sp._YE281	0.0021	0.0113908	0.00749819	0.000578516
Bordetella_petrii	0.0021	0.0120394	0.00749819	0.000578516
Streptococcus_oralis	0.0021	0.0124286	0.00749819	0.000578516
Bifidobacterium_pullorum	0.0007	0.0126103	0.00666506	0
Escherichia_albertii	0.0009	0.0129735	0.00666506	0
Edwardsiella_tarda	0.001	0.0129476	0.00666506	0
bacterium_ic1391	0.0043	0.0126362	0.00666506	0.000578516
Bifidobacterium_sp.	0.005	0.0123508	0.00666506	0.000578516
swine_fecal_bacterium_RF2C-Xyl8	0.0019	0.0138817	0.00583192	0
Pectobacterium_cypripedii	0.002	0.0138557	0.00583192	0
Citrobacter_farmeri	0.0021	0.0131811	0.00583192	0
Hafnia_alvei	0.0022	0.0138298	0.00583192	0
Mannheimia_succiniciproducens	0.0095	0.0155423	0.00583192	0.000578516
Clostridium_sp._MT_162	0.0097	0.0144525	0.00583192	0.000578516
Enterobacter_asburiae	0.0098	0.0132071	0.00583192	0.000578516
Bifidobacterium_boum	0.0104	0.0131292	0.00583192	0.000578516
Clostridium_irregulare	0.0046	0.0156201	0.00499879	0
Pectobacterium_wasabiae	0.0046	0.0158537	0.00499879	0
Vibrio_cholerae	0.0046	0.0164504	0.00499879	0
Escherichia_sp._M1N2G03	0.0047	0.014193	0.00499879	0
Bifidobacterium_gallinarum	0.0048	0.014712	0.00499879	0
Eggerthella_sp._CJ88	0.0051	0.0137519	0.00499879	0
Pantoea_ananatis	0.0051	0.0159315	0.00499879	0
Enterobacter_radicincitans	0.0052	0.0144006	0.00499879	0
Bifidobacterium_simiae	0.0107	0.0152309	0.00416566	0
Citrobacter_koseri	0.0111	0.0160872	0.00416566	0
Yersinia_pestis	0.0112	0.0163985	0.00416566	0
Actinobacillus_minor	0.0112	0.0172029	0.00416566	0
bacterium_C15	0.0113	0.0165023	0.00416566	0
Erwinia_amylovora	0.0114	0.015205	0.00416566	0
Cronobacter_turicensis	0.0114	0.0163467	0.00416566	0
Escherichia_vulneris	0.0115	0.0148158	0.00416566	0
bacterium_Ba2	0.0118	0.0152828	0.00416566	0
Shigella_sp._55	0.0119	0.0148417	0.00416566	0
Shigella_sp._4109	0.012	0.0163726	0.00416566	0
Erwinia_rhapontici	0.012	0.0167878	0.00416566	0
Bifidobacterium_tsurumiense	0.0125	0.0152569	0.00416566	0
Prevotella_genomosp._P4	0.006	0.0400104	0.000833132	0.00809923
Prevotella_sp._N19-22	0.0062	0.0400363	0.000833132	0.00809923
Prevotella_sp._HY-36-2	0.0037	0.0331344	0.000833132	0.00867774
Prevotella_sp._E9_42	0.0083	0.0248832	0.00166626	0.00983478
bacterium_ic1340	0.0085	0.022055	0.0024994	0.0109918
Catonella_morbi	0.005	0.0223145	0.00166626	0.0104133
Lactobacillus_delbrueckii	0.0091	0.01959	0.0024994	0.0115703
Clostridium_beijerinckii	0.0015	0.0442398	0.000833132	0.0104133
Oscillibacter_valericigenes	0.0055	0.0183965	0.00333253	0.0133059
Fastidiosipila_sanguinis	0.0056	0.0173845	0.00333253	0.0133059
Prevotella_multiformis	0.0008	0.0387909	0.000833132	0.0109918
Prevotella_veroralis	0.0009	0.0400882	0.000833132	0.0109918
bacterium_ASF500	0.0029	0.0183705	0.0024994	0.0127274
butyrate-producing_bacterium_SR1/5	0.0037	0.0209133	0.0024994	0.0127274
Anaerofilum_pentosovorans	0.0063	0.0168396	0.00333253	0.0138844
Clostridium_sp._SC106	0.0078	0.0145823	0.00499879	0.0156199
Prevotella_pleuritidis	0.0005	0.0278153	0.000833132	0.0115703
Eubacterium_angustum	0.0015	0.0214842	0.00166626	0.0127274
butyrate-producing_bacterium_PH07BW09	0.0081	0.0145304	0.00499879	0.0161985
human_intestinal_firmicute_CO13	0.0021	0.0178256	0.00333253	0.0150414
Prevotella_micans	0.0003	0.0387649	0.000833132	0.0127274
Lactobacillus_helveticus	0.0004	0.0240529	0.00166626	0.0138844
Prevotella_bryantii	0.0002	0.0277634	0.000833132	0.0133059
swine_fecal_bacterium_SD-Pec1	0.0003	0.0499222	0.000833132	0.0133059
Prevotella_maculosa	0.0012	0.018604	0.0024994	0.0150414
Clostridium_sp._A9	0.0045	0.0130514	0.00583192	0.0185125
Clostridium_sp._CE6	0.005	0.0130773	0.00583192	0.0185125
human_intestinal_firmicute_CO2	0.0053	0.0133108	0.00749819	0.0202481
Ruminococcus_sp._SC101	0.0002	0.02452	0.00166626	0.0144629
Porphyromonadaceae_bacterium_JN18_A107_G	0	0.0275298	0.000833132	0.0138844
Prevotella_amnii	0.0001	0.0399844	0.000833132	0.0138844
swine_fecal_bacterium_FPC67	0.0017	0.0140114	0.00499879	0.0185125
Erysipelothrix_tonsillarum	0.0018	0.0159056	0.00499879	0.019091
Porphyromonas_gingivalis	0.001	0.0135444	0.00583192	0.0202481
Dialister_micraerophilus	0.0001	0.0251687	0.00166626	0.0161985
Dysgonomonas_mossii	0.0006	0.0198755	0.00333253	0.017934
Bacteroides_xylanolyticus	0.0097	0.0102231	0.012497	0.0271903
Prevotella_loescheii	0.0004	0.0153866	0.00416566	0.019091
bacterium_ic1393	0.0079	0.00835496	0.0166626	0.0329754
Clostridiaceae_bacterium_SH032	0.0007	0.0140374	0.00666506	0.0231406
Eubacterium_sp._SG122	0	0.0244681	0.00166626	0.0185125
Clostridium_phytofermentans	0.0077	0.00775817	0.0166626	0.0335539
Oscillospira_sp._H	0.0005	0.012247	0.00666506	0.0242977
Shuttleworthia_satelles	0.0015	0.009315	0.0116638	0.0295043
Clostridium_aldenense	0.002	0.008822	0.0133301	0.0312399
Prevotella_buccae	0	0.0248573	0.00166626	0.0202481
Bacteroides_sp._EBA1-2	0	0.020576	0.0024994	0.0214051
Clostridium_acetobutylicum	0	0.0218734	0.0024994	0.0214051
bacterium_mpn-isolate_group_22	0	0.0321225	0.000833132	0.0202481
Dialister_sp._GBA27	0.0011	0.00895174	0.0133301	0.0329754
Eubacterium_sp._SG121	0	0.0158796	0.00499879	0.0248762
butyrate-producing_bacterium_M104/1	0.0001	0.0136741	0.00499879	0.0248762
Anaerotruncus_sp._NML_070203	0	0.0133887	0.00583192	0.0266117
bacterium_mpn-isolate_group_24	0.004	0.0066165	0.0224946	0.0433887
Bacteroides_sp._CS3	0	0.0135184	0.00583192	0.0271903
rumen_bacterium_8/94-32	0	0.0113129	0.00749819	0.0295043
Ruminococcus_sp._CO12	0.0004	0.00858848	0.0149964	0.037025
Prevotella_histicola	0	0.0221588	0.00166626	0.0237192
butyrate-producing_bacterium_L1-810	0.0004	0.00768033	0.0141632	0.0364465
Clostridium_ljungdahlii	0	0.0179813	0.00416566	0.0266117
Prevotella_tannerae	0.0001	0.0110535	0.00833132	0.0318184
Fusobacterium_sp._CO5	0.0016	0.00692787	0.0258271	0.0503309
Eubacterium_cylindroides	0.0006	0.00677218	0.0199952	0.0445457
Prevotella_nanceiensis	0	0.0218215	0.0024994	0.0271903
Bacteroides_sp._CS21	0	0.0181111	0.00333253	0.0283473
Eubacteriaceae_bacterium_DJF_CR57k1	0.0001	0.0100415	0.0116638	0.0376036
Ruminococcus_sp._CO1	0.0001	0.00973015	0.012497	0.0387606
Lactococcus_lactis	0	0.0121173	0.00833132	0.0352895
human_intestinal_firmicute_CO19	0.0073	0.00464453	0.0541536	0.0815708
Clostridium_scindens	0.0108	0.00409964	0.0616518	0.0890915
Bacteroides_pectinophilus	0.0003	0.00625324	0.0241608	0.0520665
Clostridium_sp._ADS23	0.0101	0.00337312	0.0658174	0.0942981
Ruminococcus_sp._CO22	0	0.0108978	0.00999758	0.0387606
butyrate-producing_bacterium_L2-50	0	0.0263882	0.00166626	0.0306614
Clostridium_sp.	0.0035	0.00365854	0.063318	0.0954552
Dialister_propionicifaciens	0	0.013726	0.00583192	0.0404961
Clostridiaceae_bacterium_DJF_LS13	0	0.0112091	0.00833132	0.0433887
Prevotella_denticola	0	0.0125324	0.00666506	0.0428102
Clostridia_bacterium_TSW07CA7	0	0.0231707	0.00166626	0.0387606
Prevotella_baroniae	0	0.0248313	0.00166626	0.0387606
Eubacterium_cellulosolvens	0	0.00591593	0.0324921	0.072893
Dialister_pneumosintes	0	0.0120913	0.00749819	0.0491739
Anaerostipes_sp._AIP_183.04	0	0.00936689	0.0133301	0.0601657
human_intestinal_firmicute_CS26	0	0.0166061	0.00333253	0.0503309
Ruminococcus_sp._CJ63	0.0006	0.00298391	0.101642	0.148679
Parabacteroides_gordonii	0	0.0241048	0.00166626	0.0497524
Clostridium_botulinum	0	0.0265439	0.00166626	0.0503309
butyrate-producing_bacterium_Ph07AY02	0	0.0136482	0.00749819	0.0566946
butyrate-producing_bacterium_SM4/1	0	0.00391801	0.0491548	0.0989263
Clostridium_butyricum	0	0.011754	0.00916445	0.0613227
Acetonema_longum	0	0.00329528	0.0666506	0.122067
Prevotella_salivae	0	0.0229632	0.00166626	0.0584301
bacterium_ic1296	0	0.0125584	0.00833132	0.0653723
Parabacteroides_sp._DJF_B084	0	0.0111832	0.00666506	0.0665294
Odoribacter_splanchnicus	0	0.00734302	0.0241608	0.088513
Blautia_producta	0.0001	0.00140114	0.162461	0.227357
Coprococcus_comes	0	0.00386611	0.0524873	0.118596
Fusobacterium_sp._CB14	0	0.00469642	0.0508211	0.12091
butyrate-producing_bacterium_ART55/1	0	0.00539699	0.0399903	0.110497
Parabacteroides_goldsteinii	0	0.00674624	0.0166626	0.088513
Prevotella_intermedia	0	0.0118319	0.00749819	0.0844634
Eubacterium_siraeum	0	0.00786196	0.0158295	0.0931411
Prevotella_oris	0	0.0101972	0.00999758	0.088513
Lachnospiraceae_bacterium_DJF_RP14	0	0.00433316	0.0558198	0.137108
Mogibacterium_pumilum	0	0.0389984	0.000833132	0.0850419
Prevotella_sp._oral_taxon_313	0	0.0189933	0.0024994	0.0919841
Verrucomicrobia_bacterium_MS-F-88	0	0.0318371	0.000833132	0.090827
Phascolarctobacterium_faecium	0	0.00194603	0.114139	0.204795
butyrate-producing_bacterium_PH07BY04	0	0.00295797	0.103308	0.197853
butyrate-producing_bacterium_L1-952	0	0.0126881	0.00583192	0.100662
Prevotella_melaninogenica	0	0.0130254	0.00583192	0.101819
Prevotella_nigrescens	0	0.0105864	0.00916445	0.106447
butyrate-producing_bacterium_P607	0	0.00892579	0.0141632	0.113389
Prevotella_oulorum	0	0.0159574	0.00416566	0.104711
butyrate-producing_bacterium_PH07AY3	0	0.0075506	0.0199952	0.123224
Fusobacterium_sp._CO6	0	0.00430721	0.0674837	0.171241
Roseburia_sp._11SE38	0	0.0104307	0.0116638	0.115703
Roseburia_sp._11SE37	0	0.00827711	0.0174958	0.124381
butyrate-producing_bacterium_PH05YB02	0	0.00812143	0.0183289	0.129009
Bacteroides_sp._BL52	0.0006	0.000311365	0.697331	0.81108
Dialister_invisus	0	0.00505968	0.0399903	0.156778
swine_fecal_bacterium_RF3E-Xyl1	0	0.0035288	0.06915	0.19496
Bacteroides_sp._CJ69	0	0.00550078	0.0299928	0.16372
butyrate-producing_bacterium_M50/1	0	0.00783601	0.0166626	0.150414
Clostridium_perfringens	0	0.00902958	0.0133301	0.1481
Roseburia_faecis	0	0.00111572	0.229111	0.365044
bacterium_str._31285	0	0.00563051	0.0291596	0.167191
Burkholderiales_bacterium_Smarlab_3302047	0	0.017177	0.00416566	0.142894
Bacteroides_sp._BBDP74	0	0.000285418	0.713161	0.852733
Roseburia_hominis	0	0.00272444	0.104141	0.245291
Sutterella_parvirubra	0	0.00334717	0.0816469	0.223886
Roseburia_intestinalis	0	0.0030877	0.0683168	0.211158
Parabacteroides_merdae	0	0.00913337	0.00999758	0.168348
human_intestinal_firmicute_CO4	0	0.0074987	0.0199952	0.181076
Ruminococcus_obeum	0	0.0013233	0.176624	0.411325
Clostridiaceae_bacterium_DJF_VR09	0	0.000985989	0.257438	0.500995
Ruminococcus_sp._YE58	0	0.00345096	0.0799807	0.323969
butyrate-producing_bacterium_M21/2	0	0.00199792	0.156629	0.403226
Clostridiales_bacterium_A2-162	0	0.00389206	0.0666506	0.317027
Sutterella_wadsworthensis	0	0.00277634	0.0941439	0.351738
Prevotella_ruminicola	0	0.00607161	0.0241608	0.282894
Ruminococcus_sp.	0	0.0026985	0.0966433	0.369672
butyrate-producing_bacterium_SS2/1	0	0.00238713	0.113306	0.422895
bacterium_08.96.4	0	0.00259471	0.103308	0.414218
Prevotella_timonensis	0	0.027919	0.000833132	0.334382
human_intestinal_firmicute_CB47	0	0.00189414	0.160794	0.496367
bacterium_ic1379	0	0.00108978	0.239109	0.577359
Akkermansia_muciniphila	0	0.0217436	0.00166626	0.34306
Anaerostipes_sp._35-7	0	0.00217955	0.116638	0.466284
Bacteroides_vulgatus	0	0.000155682	1.17722	1.5296
butyrate-producing_bacterium_PH07AY5	0	0.000570835	0.415733	1.00257
Prevotella_falsenii	0	0.0111313	0.00833132	0.635211
Bacteroides_caccae	0	0.000518941	0.387406	1.07026
Subdoligranulum_sp._DJF_VR33k2	0	0.000389206	0.738988	1.47695
Prevotellaceae_bacterium_DJF_RP17	0	0.0399066	0.000833132	0.743393
Parabacteroides_distasonis	0	0.00241308	0.0833132	0.981164
rumen_bacterium_R-9	0	0.0195641	0.0024994	1.70489
Faecalibacterium_prausnitzii	0	0.000103788	2.15198	4.26945
Prevotella_copri	0	0.0153607	0.00416566	2.15266
unidentified_bacterium_ZF3	0.0134	0.010794	0.00833132	0.0202481
bacterium_mpn-isolate_group_20	0.0135	0.00664245	0.0208283	0.0376036
Eubacterium_sp._C12b	0.0137	0.0201349	0.0024994	0.0104133
human_intestinal_firmicute_CB17	0.0145	0.0115983	0.00999758	0.00289258
Clostridiaceae_bacterium_DJF_LS40	0.0147	0.0131552	0.00583192	0.0161985
Collinsella_stercoris	0.015	0.00944473	0.012497	0.00404961
Bacteroides_cellulosilyticus	0.0152	0.00256876	0.0774813	0.053802
Bacteroides_sp._XB12B	0.0154	0.00420343	0.0491548	0.0306614
Bacteroides_sp._31SF15	0.0157	0.00355475	0.0591524	0.0387606
Alistipes_finegoldii	0.0169	0.00103788	0.16496	0.130166
Sutterella_stercoricanis	0.0183	0.0110794	0.0108307	0.0034711
Clostridium_glycyrrhizinilyticum	0.0187	0.0179554	0.00416566	0.0127274
Bacteroides_coprocola	0.0191	0.00378827	0.0666506	0.0925626
Eubacterium_sp._WAL_14571	0.0194	0.0121432	0.00666506	0.00115703
Bacteroidales_str._KB9	0.0195	0.0330825	0.000833132	0.00694219
Bacteroidaceae_bacterium_SV444	0.0196	0.0131033	0.00666506	0.00115703
Oscillospira_guilliermondii	0.0197	0.0120135	0.00666506	0.016777
Bifidobacterium_sp._oral_strain_A32ED	0.0199	0.0114946	0.00666506	0.00115703
Clostridium_cocleatum	0.0205	0.00454074	0.0424897	0.0260332
Eubacterium_yurii	0.0209	0.00596783	0.024994	0.0127274
Pasteurella_pneumotropica	0.021	0.0167099	0.00499879	0.000578516
Clostridiaceae_bacterium_NML_060002	0.021	0.0252984	0.00166626	0.00809923
Streptococcus_vestibularis	0.0214	0.0141152	0.00499879	0.000578516
Bifidobacterium_thermophilum	0.0215	0.0139076	0.00499879	0.000578516
Clostridium_lentocellum	0.0215	0.0410483	0.000833132	0.00694219
Edwardsiella_ictaluri	0.0222	0.0141671	0.00499879	0.000578516
Prevotella_sp._B31FD	0.0228	0.0229891	0.00166626	0.00867774
butyrate-producing_bacterium_M62/1	0.0229	0.0026466	0.114972	0.146943
Clostridium_oroticum	0.0231	0.00954852	0.0108307	0.0225621
Blautia_schinkii	0.0245	0.00511157	0.0383241	0.0231406
Lactococcus_garvieae	0.0268	0.0117281	0.00833132	0.0185125
Shigella_sp._4095	0.0269	0.0175402	0.00333253	0
Citrobacter_rodentium	0.0272	0.017151	0.00333253	0
swine_fecal_bacterium_RF2B-Pec13	0.0274	0.0164764	0.00333253	0
Enterobacteriales_bacterium_LBRN-NC18	0.0278	0.0189673	0.00333253	0
Streptococcus_intermedius	0.0279	0.0168137	0.00333253	0
Escherichia_sp._EMB_210	0.0279	0.0182667	0.00333253	0
Actinobacillus_succinogenes	0.0279	0.0200052	0.00333253	0
bacterium_ES18	0.028	0.0185522	0.00333253	0
Veillonella_sp._ADV_360.00	0.0281	0.0185262	0.00333253	0
Streptococcus_sanguinis	0.0282	0.0109237	0.00833132	0.00231406
Peptostreptococcus_sp.	0.0283	0.0189414	0.00333253	0
Bifidobacterium_sp._IR007-113	0.0285	0.0165542	0.00333253	0
Enterobacter_pulveris	0.0285	0.016684	0.00333253	0
Shigella_sp._YAAJ-10	0.0285	0.0175662	0.00333253	0
Eggerthella_sp._SDG-2	0.0285	0.0184224	0.00333253	0
proteobacterium_symbiont_of_Nilaparvata_lugens	0.0286	0.0122989	0.00833132	0.00231406
bacterium_Iso11_2	0.0286	0.0163207	0.00416566	0.0121488
Pectobacterium_atrosepticum	0.0287	0.0168656	0.00333253	0
Bifidobacterium_sp._MW-222	0.0288	0.0169953	0.00333253	0
Veillonella_sp._NVG_88cf	0.0289	0.0173326	0.00333253	0
Escherichia_sp._6CR	0.0289	0.0182408	0.00333253	0
Serratia_proteamaculans	0.0295	0.0177997	0.00333253	0
Clostridium_aminovalericum	0.0296	0.0137779	0.00583192	0.0144629
Clostridium_sp._pandaD	0.0305	0.00739491	0.0166626	0.0295043
Lachnospiraceae_bacterium_DJF_RR13	0.031	0.00487805	0.0491548	0.0323969
Bacillus_sp._4b	0.0317	0.0169175	0.00333253	0.0109918
Oscillospiraceae_bacterium_NML_061048	0.0326	0.0112351	0.00749819	0.0173555
Ruminococcus_sp._M76	0.0329	0.0344318	0.000833132	0.00578516
Hydrogenoanaerobacterium_saccharovorans	0.0334	0.01178	0.00749819	0.0173555
Prevotella_sp._oral_taxon_292	0.0337	0.0278931	0.000833132	0.00636368
Eubacterium_rangiferina	0.0342	0.0390244	0.000833132	0.00636368
Clostridium_homopropionicum	0.035	0.0443435	0.000833132	0.00578516
butyrate-producing_bacterium_T1-815	0.0356	0.0057343	0.0233277	0.0381821
bacterium_mpn-isolate_group_18	0.0357	0.00817333	0.0158295	0.0283473
Prevotella_sp._DJF_RP53	0.0357	0.0388168	0.000833132	0.00636368
Clostridium_sp._BL-14	0.0359	0.0446549	0.000833132	0.00636368
swine_fecal_bacterium_FPC111	0.0369	0.00806954	0.0166626	0.00809923
bacterium_Ba1	0.0371	0.0124027	0.00583192	0.00115703
Mannheimia_varigena	0.0373	0.0148677	0.00583192	0.00115703
rumen_bacterium_3/9293-14A	0.038	0.0114686	0.00916445	0.00289258
Ruminococcus_sp._M-1	0.0385	0.00700571	0.019162	0.0323969
Ruminococcus_sp._CO34	0.0397	0.00985989	0.0108307	0.00404961
Clostridiaceae_bacterium_DJF_B063	0.0399	0.0103529	0.012497	0.0231406
Ruminococcus_sp._CB10	0.0402	0.0151531	0.00416566	0.0115703
Lachnobacterium_bovis	0.0448	0.00923716	0.0158295	0.0271903
Acidaminococcus_fermentans	0.0455	0.0169434	0.00333253	0.00983478
Mannheimia_haemolytica	0.0455	0.0180592	0.00416566	0.000578516
Brenneria_quercina	0.0458	0.0154645	0.00416566	0.000578516
Denitrobacterium_detoxificans	0.0459	0.0150234	0.00416566	0.000578516
Clostridium_herbivorans	0.0466	0.00443695	0.0541536	0.0740501
Bifidobacterium_sp._M24	0.0468	0.014219	0.00416566	0.000578516
Streptococcus_gallolyticus	0.0481	0.0119616	0.00749819	0.00231406
Ruminococcus_sp._ID1	0.0486	0.00856253	0.0116638	0.00462813
Porphyromonas_levii	0.0489	0.00477426	0.0399903	0.0572731
Clostridiales_bacterium_DJF_B152	0.0516	0.00555267	0.0299928	0.0451243
unidentified_bacterium_MK1-309	0.052	0.0103788	0.00916445	0.0034711
butyrate-producing_bacterium_L1-81	0.0527	0.00404774	0.0466554	0.0647938
human_intestinal_firmicute_CO10	0.0538	0.00962636	0.012497	0.0225621
Anaerotruncus_sp._G3	0.0545	0.029917	0.000833132	0.00520665
Clostridium_sp._Sukashi-1	0.0562	0.0341723	0.000833132	0.00520665
bacterium_ic1395	0.0565	0.0320965	0.000833132	0.00520665
Oscillospira_sp._B	0.0567	0.0299429	0.000833132	0.00520665
human_intestinal_bacterium_julong_601	0.0592	0.00282823	0.101642	0.0798352
anaerobic_bacterium_EtOH8	0.0601	0.01274	0.00666506	0.00173555
Veillonella_sp._oral_taxon_780	0.061	0.00967826	0.00999758	0.00404961
Streptococcus_dysgalactiae	0.061	0.0104826	0.00999758	0.00404961
Anaerostipes_sp._IE4	0.0612	0.00659056	0.0199952	0.0109918
Lachnospiraceae_bacterium_DJF_VP17k1	0.0658	0.00300986	0.0991427	0.0780997
butyrate-producing_bacterium_PH07BW10	0.0658	0.00417748	0.0449891	0.0619012
Victivallis_vadensis	0.0663	0.0179294	0.0024994	0
Brenneria_nigrifluens	0.0664	0.0192008	0.0024994	0
Streptococcus_cristatus	0.0669	0.0196679	0.0024994	0
bacterium_ZhS050715	0.067	0.0211469	0.0024994	0
butyrate-producing_bacterium_PH05YA09	0.0671	0.00941879	0.012497	0.00578516
Streptococcus_parauberis	0.0671	0.0197198	0.0024994	0
Pasteurella_mairii	0.0671	0.0227556	0.0024994	0
bacterium_B4-10	0.0673	0.0193306	0.0024994	0
Vibrio_campbellii	0.0673	0.0208355	0.0024994	0
Bifidobacterium_sp._CJ59	0.0676	0.019097	0.0024994	0
Cronobacter_malonaticus	0.0676	0.0192527	0.0024994	0
Rahnella_aquatilis	0.0676	0.0193046	0.0024994	0
Escherichia_hermannii	0.0676	0.0203684	0.0024994	0
Citrobacter_sp._HPC_1199	0.0677	0.0192268	0.0024994	0
coliform_bacterium_S2/34	0.0677	0.0193565	0.0024994	0
Pseudomonas_fluorescens	0.0677	0.0208095	0.0024994	0
coliform_bacterium_S3/117	0.0677	0.0211728	0.0024994	0
Sodalis_glossinidius	0.0679	0.0219772	0.0024994	0
swine_fecal_bacterium_RF1A-Cel5	0.068	0.0193825	0.0024994	0
Leclercia_adecarboxylata	0.068	0.0210431	0.0024994	0
Enterobacter_sp._DAP19	0.0681	0.0192787	0.0024994	0
Pasteurellaceae_bacterium_R46	0.0681	0.0227815	0.0024994	0
swine_manure_bacterium_37-1	0.0683	0.0204463	0.0024994	0
Escherichia_sp._ZY-2006a	0.0683	0.0210171	0.0024994	0
Bifidobacterium_psychraerophilum	0.0684	0.0186819	0.0024994	0
Citrobacter_murliniae	0.0686	0.0203166	0.0024994	0
Shigella_sp._121403	0.0686	0.021095	0.0024994	0
Cronobacter_dublinensis	0.0687	0.0203425	0.0024994	0
Veillonella_sp._NVG_05cf	0.0688	0.01863	0.0024994	0
swine_fecal_bacterium_RF3D-Cel1	0.0688	0.0212247	0.0024994	0
fruit_powder_bacterium_509/05	0.0689	0.0191749	0.0024994	0
bacterium_SAL_18	0.069	0.0188116	0.0024994	0
Streptococcus_constellatus	0.069	0.0202128	0.0024994	0
Trabulsiella_guamensis	0.069	0.0204203	0.0024994	0
Veillonella_sp._NVG_24cf	0.0691	0.0179035	0.0024994	0
Escherichia_sp._BBDP20	0.0691	0.0203944	0.0024994	0
Petrobacter_succinatimandens	0.0691	0.0219512	0.0024994	0
swine_fecal_bacterium_RF1A-Cel6	0.0691	0.0228853	0.0024994	0
Bifidobacterium_sp._group_II-3	0.0693	0.019123	0.0024994	0
Shigella_sp._4104	0.0693	0.0211209	0.0024994	0
Actinobacillus_equuli	0.0696	0.0164245	0.00499879	0.00115703
bovine_rumen_bacterium_JPR1	0.0696	0.0228594	0.0024994	0
Clostridium_sp._MT54	0.0697	0.0151012	0.00499879	0.00115703
Geobacillus_sp._Y2-2	0.0697	0.0191489	0.0024994	0
Plesiomonas_sp._T1N1D03	0.0699	0.0206798	0.0024994	0
swine_fecal_bacterium_RF3G-Cel2	0.0701	0.0155682	0.00499879	0.00115703
Brenneria_alni	0.0703	0.0197976	0.0024994	0
Firmicutes_bacterium_VNs39	0.0704	0.0153088	0.00499879	0.00115703
Pantoea_sp._NIIST-186	0.0704	0.0198236	0.0024994	0
Bifidobacterium_sp._Bma6	0.0708	0.0201868	0.0024994	0
Bacteroides_nordii	0.0773	0.000960042	0.229944	0.263803
Clostridium_leptum	0.078	0.00716139	0.019162	0.0300828
rumen_bacterium_8/9293-6	0.0796	0.0201609	0.0024994	0.00752071
Clostridium_metallolevans	0.0818	0.0133627	0.00666506	0.00231406
Bifidobacterium_ruminantium	0.0824	0.012273	0.00666506	0.00231406
Clostridiaceae_bacterium_37-7-2Cl	0.0825	0.0197717	0.0024994	0.00809923
Desulfovibrio_ferrophilus	0.0828	0.00697976	0.0158295	0.00867774
butyrate-producing_bacterium_A2-232	0.0837	0.00897769	0.0141632	0.0237192
bacterium_MB7-1	0.0843	0.0128438	0.00666506	0.00231406
Bacteroides_sp._253c	0.0869	0.0061754	0.0274934	0.0173555
Dorea_formicigenerans	0.0899	0.0139336	0.00583192	0.0127274
Porphyromonas_gulae	0.09	0.0397509	0.000833132	0.00462813
Eubacterium_ramulus	0.0902	0.00290607	0.0816469	0.101819
Bacteroidales_str._KB12	0.0906	0.0396471	0.000833132	0.00462813
Lactobacillus_plantarum	0.0914	0.0334717	0.000833132	0.00462813
Lachnospiraceae_bacterium_19gly4	0.0923	0.0325895	0.000833132	0.00462813
Clostridiaceae_bacterium_FH052	0.0924	0.0429683	0.000833132	0.00462813
rod-shaped_symbiont_of_Mixotricha_paradoxa	0.0925	0.0317852	0.000833132	0.00462813
Prevotella_aurantiaca	0.0931	0.0277374	0.000833132	0.00462813
Prevotella_sp._CH16.6	0.0967	0.00228334	0.102475	0.124381
rumen_bacterium_1/9293-2	0.0977	0.0101713	0.0116638	0.00578516
Bacteroides_sp._AR29	0.1008	0.0146601	0.00583192	0.00173555
Clostridium_lituseburense	0.1027	0.0128957	0.00749819	0.00289258
Clostridium_sp._W3RG7	0.1028	0.0139595	0.00583192	0.00173555
Clostridium_sp._Iso-A2	0.1031	0.0144785	0.00583192	0.00173555
Firmicutes_bacterium_DJF_VP44	0.1064	0.00581214	0.0233277	0.0144629
Clostridium_difficile	0.1069	0.0100934	0.012497	0.00636368
Bacteroides_sp._DSM_12148	0.1098	0.00957447	0.00999758	0.00462813
bacterium_ic1272	0.1107	0.0101194	0.00999758	0.00462813
Bacteroides_sp._EBA5-17	0.1111	0.00230929	0.10914	0.130745
Prevotella_paludivivens	0.1179	0.0195122	0.0024994	0.00694219
Bacteroides_barnesiae	0.1199	0.00788791	0.0158295	0.0248762
Clostridium_viride	0.12	0.0202647	0.0024994	0.00694219
Bacteroides_sp._D8	0.1208	0.0204722	0.0024994	0.00694219
Anaerostipes_caccae	0.1238	0.00368448	0.0608186	0.0468598
Bacteroides_sp._CB57	0.1242	0.0115464	0.00833132	0.0034711
human_intestinal_firmicute_CJ6	0.1266	0.0159834	0.00416566	0.00925626
Ruminococcus_sp._9SE51	0.1301	0.015672	0.00416566	0.00115703
Peptostreptococcus_sp._C27	0.131	0.0180073	0.00416566	0.00115703
endosymbiont_of_Sphenophorus_levis	0.1311	0.0165283	0.00416566	0.00115703
Bacteroides_sp._BL14	0.1315	0.0156461	0.00416566	0.00115703
Clostridium_sp._cTPY-2-4	0.1344	0.00576025	0.0266602	0.0376036
human_intestinal_firmicute_CJ31	0.1358	0.0224702	0.00166626	0.00578516
Clostridiaceae_bacterium_WN011	0.1371	0.0254281	0.00166626	0.00520665
Lactobacillus_fermentum	0.1381	0.0250389	0.00166626	0.00520665
Porphyromonas_endodontalis	0.1383	0.0248054	0.00166626	0.00520665
Ruminococcus_sp._CO28	0.1387	0.00874416	0.0174958	0.0266117
Bacteroides_gallinarum	0.14	0.0243124	0.00166626	0.00520665
Clostridiales_bacterium_DJF_VP35	0.1405	0.00949663	0.0108307	0.00578516
Clostridium_sp._strain_Z6	0.141	0.0222626	0.00166626	0.00578516
butyrate-producing_bacterium_L1-93	0.1455	0.0153347	0.00499879	0.0104133
human_intestinal_bacterium_PUE	0.1458	0.0155942	0.00499879	0.0104133
Collinsella_aerofaciens	0.1468	0.0116243	0.00833132	0.00404961
Alistipes_massiliensis	0.1469	0.0158018	0.00333253	0.00809923
rumen_bacterium_RC7r-54	0.1472	0.0108718	0.00833132	0.00404961
Eubacterium_sp._SG1213	0.1561	0.00825117	0.0183289	0.0115703
Ruminococcus_sp._CCUG_37327_A	0.1576	0.00560457	0.0291596	0.0202481
Anaplasma_phagocytophilum	0.16	0.00804359	0.0166626	0.0248762
bacterium_YE266	0.1618	0.012766	0.00666506	0.00289258
Clostridiales_bacterium_DJF_CP67	0.1622	0.0104048	0.00916445	0.00462813
Bisgaard_Taxon_45	0.1642	0.0267514	0.00166626	0
Enterobacter_sp._C18	0.1643	0.0223664	0.00166626	0
Gemella_morbillorum	0.1646	0.017644	0.00333253	0.000578516
Yersinia_enterocolitica	0.1647	0.0216917	0.00166626	0
Bifidobacterium_sp._JCM_7013	0.1651	0.0169694	0.00333253	0.000578516
Bifidobacterium_crudilactis	0.1653	0.0157758	0.00333253	0.000578516
Mannheimia_sp._B1829/84	0.1654	0.0259471	0.00166626	0
Shigella_sp._DBC-1	0.1655	0.0258952	0.00166626	0
cf._Escherichia_coli_symbiont_4_of_Acromyrmex_octospinosus	0.1656	0.0216399	0.00166626	0
Shigella_sp._T47090	0.1657	0.0238454	0.00166626	0
Erwinia_billingiae	0.1657	0.0257135	0.00166626	0
Rikenellaceae_bacterium_JAM-BA0501	0.1658	0.0213544	0.00166626	0
Enterococcus_moraviensis	0.1659	0.0233005	0.00166626	0
Gemella_sp._933-88	0.1659	0.0241308	0.00166626	0
Mannheimia_sp._M14.4	0.1659	0.0269331	0.00166626	0
Bifidobacterium_thermacidophilum	0.166	0.0176959	0.00333253	0.000578516
Veillonella_sp._HF9	0.166	0.021562	0.00166626	0
Bifidobacterium_sp._65947	0.1662	0.0232226	0.00166626	0
swine_fecal_bacterium_RF2B-Pec14	0.1664	0.0261028	0.00166626	0
bacterium_Ba211	0.1665	0.0217696	0.00166626	0
bacterium_C20	0.1665	0.0239232	0.00166626	0
bacterium_DAB_16s_R32(2)	0.1665	0.0239491	0.00166626	0
Pantoea_sp._42HD1	0.1665	0.0257914	0.00166626	0
Actinobacillus_capsulatus	0.1665	0.0267774	0.00166626	0
bacterium_Bm31	0.1666	0.0238972	0.00166626	0
Enterococcus_faecalis	0.1667	0.0174624	0.00333253	0.000578516
Citrobacter_sp._A9IG	0.1667	0.0234821	0.00166626	0
Clostridium_venationis	0.1668	0.0175143	0.00333253	0.000578516
Alkaliflexus_imshenetskii	0.1668	0.0221328	0.00166626	0
Actinobacillus_lignieresii	0.1668	0.0268033	0.00166626	0
Blautia_wexlerae	0.1669	0.00809549	0.0149964	0.00925626
Clostridium_sp._27	0.167	0.0184484	0.00333253	0.000578516
Streptococcus_australis	0.167	0.0199533	0.00333253	0.000578516
Cytophaga_sp._AN-BI4	0.167	0.0221847	0.00166626	0
Clostridium_algidixylanolyticum	0.167	0.0250649	0.00166626	0
Providencia_rettgeri	0.167	0.0258173	0.00166626	0
Gallibacterium_anatis	0.167	0.0268552	0.00166626	0
Escherichia_sp._EMB_339	0.1671	0.0236637	0.00166626	0
Yersinia_pseudotuberculosis	0.1672	0.0217177	0.00166626	0
Avibacterium_gallinarum	0.1673	0.0268293	0.00166626	0
Kluyvera_ascorbata	0.1675	0.0177737	0.00333253	0.000578516
Shigella_sp._4096	0.1675	0.0223923	0.00166626	0
Clostridium_sp._U201	0.1675	0.0251168	0.00166626	0
Shigella_sp._T47355	0.1676	0.0224183	0.00166626	0
marine_bacterium_r55	0.1676	0.0242605	0.00166626	0
Enterobacter_cancerogenus	0.1676	0.0256876	0.00166626	0
bacterium_38	0.1676	0.025973	0.00166626	0
swine_fecal_bacterium_RF1A-Pec4	0.1676	0.0271925	0.00166626	0
Escherichia	0.1677	0.0234302	0.00166626	0
Enterobacter_sp._PCSAS2-14	0.1677	0.0236118	0.00166626	0
Photobacterium_leiognathi	0.1678	0.0270368	0.00166626	0
Clostridium_sp._48	0.1679	0.02548	0.00166626	0
Haemophilus_sp._D191-1	0.1679	0.0268812	0.00166626	0
Clostridium_sp._AG07-8	0.168	0.0262065	0.00166626	0
Shigella_sp._RE9	0.1681	0.0238194	0.00166626	0
coliform_bacterium_Sc4	0.1681	0.0260768	0.00166626	0
Salmonella_sp._4064	0.1682	0.0258433	0.00166626	0
Candidatus_Blochmannia_floridanus	0.1682	0.0266736	0.00166626	0
primary_endosymbiont_of_Sitophilus_oryzae	0.1683	0.0256617	0.00166626	0
Pseudomonas_sp._HPC1258	0.1683	0.0270109	0.00166626	0
Streptococcus_ferus	0.1684	0.0182148	0.00333253	0.000578516
Escherichia_sp._4067	0.1684	0.0216658	0.00166626	0
Escherichia_sp._G3	0.1684	0.0237416	0.00166626	0
bacterium_mpn-isolate_group_15	0.1684	0.0260509	0.00166626	0
Vibrio_proteolyticus	0.1685	0.0270628	0.00166626	0
Prevotella_sp._Smarlab_121567	0.1686	0.023015	0.00166626	0
Escherichia_sp._ZHS050713	0.1686	0.0257654	0.00166626	0
Enterobacter_sp._Ca3	0.1687	0.0235599	0.00166626	0
bacterium_OSW_10	0.1687	0.0239751	0.00166626	0
Escherichia_sp._dayi	0.1688	0.0237675	0.00166626	0
bacterium_Bm29	0.1688	0.025999	0.00166626	0
Escherichia_sp._FHM102	0.1689	0.0237156	0.00166626	0
Streptococcus_sp._oral_strain_T4-E3	0.1689	0.026492	0.00166626	0
swine_fecal_bacterium_RF2B-Cel1	0.169	0.0242865	0.00166626	0
poultry_manure_bacterium_MUC7	0.169	0.0251946	0.00166626	0
Escherichia_sp._FH14	0.1691	0.0236897	0.00166626	0
Clostridium_sp._CM-C52	0.1691	0.0266217	0.00166626	0
Clostridium_bovipellis	0.1692	0.0241567	0.00166626	0
Firmicutes_bacterium_HF6	0.1692	0.0255838	0.00166626	0
bacterium_RI1	0.1693	0.0270887	0.00166626	0
Enterobacteriaceae_bacterium_M123	0.1695	0.0256357	0.00166626	0
Enterobacter_oryzae	0.1696	0.023534	0.00166626	0
Enterobacter_sp._PE-R	0.1696	0.0236378	0.00166626	0
Shigella_sp._BBDP15	0.1696	0.0246238	0.00166626	0
Shigella_sp._ISW_13	0.1696	0.0267255	0.00166626	0
Veillonella_sp._NVG_30cf	0.1697	0.021588	0.00166626	0
Bifidobacterium_sp._GC61	0.1698	0.0232486	0.00166626	0
Brenneria_rubrifaciens	0.1698	0.0234561	0.00166626	0
Bifidobacterium_sp._LISLUCIII-P2	0.1699	0.0253762	0.00166626	0
Firmicutes_str._C38	0.1701	0.0224442	0.00166626	0
Burkholderia_sp._G2SM45	0.1701	0.0245719	0.00166626	0
Enterobacter_cowanii	0.1701	0.0245978	0.00166626	0
Citrobacter_sp._F3-3	0.1702	0.0266995	0.00166626	0
bacterium_EI25	0.1703	0.0260249	0.00166626	0
Enterobacter_sp._DIV156	0.1704	0.0235859	0.00166626	0
Weissella_cibaria	0.1704	0.0243643	0.00166626	0
Serratia_profundus	0.1705	0.0242346	0.00166626	0
unidentified_gamma_proteobacterium_S11	0.1706	0.0238713	0.00166626	0
coliform_bacterium_S3/104	0.1707	0.0271406	0.00166626	0
Bifidobacterium_sp._MW-81	0.1709	0.0232745	0.00166626	0
Streptococcus_equinus	0.1719	0.0142968	0.00499879	0.00173555
Clostridium_sp._cTPY-12	0.1767	0.022548	0.0024994	0.00636368
Odoribacter_denticanis	0.177	0.0224961	0.0024994	0.00636368
swine_manure_pit_bacterium_PPC90	0.1771	0.0170991	0.00416566	0.00867774
Prevotella_oralis	0.1773	0.020602	0.0024994	0.00636368
Clostridium_sporogenes	0.1776	0.0183186	0.0024994	0.00636368
Butyricicoccus_pullicaecorum	0.1783	0.0226258	0.0024994	0.00636368
Oribacterium_sinus	0.1798	0.00627919	0.0241608	0.0335539
Pusillimonas_sp._H11	0.1858	0.013259	0.00749819	0.0034711
bacterium_ic1291	0.1921	0.00640893	0.0291596	0.0208266
Bacteroidaceae_bacterium_SV452	0.1954	0.000337312	0.644011	0.684385
Ruminococcus_sp._DJF_VR52	0.1983	0.00643487	0.0224946	0.0312399
Hespellia_porcina	0.2026	0.0162169	0.00499879	0.00983478
Ruminococcus_sp._CO27	0.2027	0.0121951	0.00749819	0.0127274
Lachnospiraceae_bacterium_DJF_VP30	0.2028	0.0145563	0.00499879	0.00925626
Clostridium_sticklandii	0.2033	0.0111572	0.00749819	0.0127274
butyrate-producing_bacterium_A2-207	0.2052	0.0141412	0.00499879	0.00983478
Coprococcus_eutactus	0.2066	0.00568241	0.0266602	0.035868
rumen_bacterium_8/9293-21	0.2093	0.0167359	0.00499879	0.00925626
Clostridium_sp._ID5	0.2102	0.00583809	0.0274934	0.0196696
Clostridium_celerecrescens	0.2113	0.00557862	0.0341584	0.0254547
Bacteroides_sp._CCUG_39913	0.2118	0.00646082	0.0183289	0.0121488
Clostridiaceae_bacterium_SK082	0.2127	0.0199014	0.00333253	0.00752071
bacterium_ic1297	0.2145	0.0200311	0.00333253	0.00752071
Butyrivibrio_cf._fibrisolvens_EAT6	0.2155	0.0194084	0.00333253	0.00694219
Bacteroidaceae_bacterium_S533	0.2168	0.0176181	0.00333253	0.00694219
Streptococcus_pseudopneumoniae	0.2174	0.0128697	0.00583192	0.00231406
Clostridium_sp._MU01-5	0.2208	0.0138038	0.00583192	0.00231406
Bacteroides_sp._Smarlab_3302398	0.2245	0.0123768	0.00583192	0.0104133
Clostridium_sp._10806	0.2254	0.014686	0.00583192	0.0104133
Clostridium_nexile	0.2279	0.00633108	0.024994	0.0335539
Clostridium_sp._CJ67	0.2336	0.0166321	0.00333253	0.00115703
Barnesiella_sp._EBA7-27	0.2343	0.0165802	0.00333253	0.00115703
Streptococcus_equi	0.2354	0.0181889	0.00333253	0.00115703
rumen_bacterium_37H-28A	0.2368	0.0114167	0.00833132	0.00462813
bacterium_PE03-6G18	0.2373	0.0194344	0.00333253	0.00115703
Bacteroides_sp._QQW-2006	0.2383	0.0116762	0.00833132	0.00462813
Eubacteriaceae_bacterium_DJF_B077	0.2429	0.00869227	0.0158295	0.0104133
Gemella_haemolysans	0.2458	0.0144266	0.00583192	0.00289258
Bacteroides_sp._315-5	0.2495	0.0134925	0.00583192	0.00289258
Clostridium_baratii	0.2496	0.0409964	0.000833132	0.0034711
Anaerofilum_agile	0.2507	0.029891	0.000833132	0.0034711
Clostridiales_bacterium_Yos55	0.251	0.0290607	0.000833132	0.0034711
Ruminococcus_sp._YE71	0.2523	0.0121692	0.00666506	0.0115703
Streptococcus_suis	0.2599	0.00889984	0.012497	0.00809923
Firmicutes_str._C29	0.2615	0.0226518	0.0024994	0.00578516
Prevotella_sp._oral_taxon_317	0.2623	0.0195381	0.0024994	0.00578516
Bacteroides_sp._CB53	0.2638	0.0200571	0.0024994	0.00578516
Butyrivibrio_hungatei	0.2651	0.0183446	0.0024994	0.00578516
Ruminococcus_sp._CS6	0.2657	0.00747276	0.0166626	0.0115703
Caldaterra_satsumae	0.2675	0.0113648	0.00749819	0.0121488
Roseburia_sp._11SE39	0.2677	0.00236118	0.126636	0.111654
rumen_bacterium_8/9293-5	0.2756	0.0108459	0.00999758	0.00578516
Clostridium_neopropionicum	0.2771	0.0125843	0.00666506	0.0034711
Clostridium_sp._Iso-W7	0.2825	0.0161391	0.00416566	0.00173555
Streptococcus_gordonii	0.2846	0.0161131	0.00416566	0.00173555
Clostridium_sp._ZIRB-1	0.2857	0.0167618	0.00416566	0.00173555
Bisgaard_Taxon_5	0.2869	0.0180332	0.00416566	0.00173555
Veillonella_montpellierensis	0.2886	0.0160612	0.00416566	0.00173555
bacterium_mpn-isolate_group_25	0.2903	0.00422937	0.0508211	0.0416532
rumen_bacterium_38H-46	0.2955	0.0106642	0.00999758	0.00636368
Ruminococcus_sp._WAL_17306	0.3071	0.0174364	0.00333253	0.00636368
Haemophilus_parahaemolyticus	0.3072	0.0228075	0.0024994	0.000578516
Serratia_plymuthica	0.3095	0.021069	0.0024994	0.000578516
Streptococcus_uberis	0.31	0.0197457	0.0024994	0.000578516
bacterium_ic1332	0.3105	0.0220291	0.0024994	0.000578516
Bacillus_pseudofirmus	0.3116	0.0190451	0.0024994	0.000578516
Alloscardovia_omnicolens	0.3116	0.0190711	0.0024994	0.000578516
Clostridium_sp._NB_47	0.312	0.0202387	0.0024994	0.000578516
Streptococcus_iniae	0.3121	0.0196938	0.0024994	0.000578516
Bifidobacterium_magnum	0.3121	0.0207577	0.0024994	0.000578516
Haemophilus_sp._cp03.04	0.3122	0.0228334	0.0024994	0.000578516
Megasphaera_elsdenii	0.3126	0.0187597	0.0024994	0.000578516
Shewanella_algae	0.314	0.0227296	0.0024994	0.000578516
Actinomyces_slackii	0.3145	0.0207317	0.0024994	0.000578516
Coriobacterium_sp._CCUG_33917	0.3152	0.0205501	0.0024994	0.000578516
Bacteroidetes_bacterium_Eg28	0.3166	0.00342501	0.056653	0.0474383
Veillonella_rogosae	0.3177	0.0178775	0.0024994	0.000578516
Firmicutes_bacterium_M38	0.3201	0.0115724	0.00999758	0.0144629
Clostridium_aminophilum	0.3227	0.0214323	0.00166626	0.00404961
Clostridiales_bacterium_80/3	0.3235	0.00669434	0.019162	0.0248762
Oribacterium_sp._oral_taxon_102	0.3251	0.0242086	0.00166626	0.00404961
Butyrivibrio_sp._A	0.3256	0.0262325	0.00166626	0.00404961
Ruminococcus_sp._SC103	0.3258	0.0117021	0.00666506	0.0104133
Clostridiales_bacterium_DJF_RP51	0.3262	0.010275	0.0116638	0.00752071
Riemerella_anatipestifer	0.3274	0.0261546	0.00166626	0.00404961
Clostridiales_bacterium_HAW-EB17	0.3293	0.0124805	0.00749819	0.00462813
Ruminococcus_sp._CS1	0.33	0.0123249	0.00749819	0.00462813
Clostridium_sp._OkiN108	0.3307	0.0150493	0.00499879	0.00231406
Ruminococcus_sp._M6	0.3325	0.0147379	0.00499879	0.00231406
Alistipes_sp._EBA6-25cl2	0.334	0.0110275	0.00749819	0.00462813
Lactobacillales_bacterium_HY-36-1	0.336	0.013233	0.00499879	0.00231406
Prevotella_sp.	0.3373	0.0160353	0.00416566	0.00752071
Clostridium_xylanolyticum	0.3385	0.0154385	0.00416566	0.00752071
Clostridium_sp._ArC5	0.342	0.00991178	0.0116638	0.00809923
Alistipes_sp._EBA6-25	0.3431	0.00685003	0.0166626	0.0121488
butyrate-producing_bacterium_A2-166	0.3435	0.00840685	0.0158295	0.0208266
bacterium_YE61	0.3514	0.00765439	0.0174958	0.0127274
Streptococcus_mitis	0.3515	0.00752465	0.0174958	0.0127274
Butyrivibrio_fibrisolvens	0.3605	0.00119357	0.206617	0.223307
Eubacteriaceae_bacterium_WN037	0.3644	0.00965231	0.012497	0.0173555
Clostridium_hylemonae	0.3732	0.0052932	0.0391572	0.0468598
Clostridium_sp._XB90	0.3743	0.010768	0.00916445	0.00578516
Bilophila_wadsworthia	0.3757	0.00630514	0.019162	0.0144629
Coprococcus_sp._DJF_B005	0.3791	0.0187338	0.0024994	0.00520665
Eubacterium_sp._SG1215	0.38	0.0225739	0.0024994	0.00520665
Ruminococcus_sp._Eg2	0.3821	0.0205241	0.0024994	0.00520665
Bacteroides_sp._445-9	0.3853	0.0107421	0.00916445	0.0133059
rumen_bacterium_2/9293-25	0.3868	0.0113389	0.00916445	0.0127274
Butyrivibrio_sp.	0.3868	0.0190192	0.0024994	0.00462813
Leuconostoc_mesenteroides	0.3876	0.0207836	0.0024994	0.00462813
butyrate-producing_bacterium_PH05YB03	0.3939	0.00801764	0.0141632	0.0104133
Lachnospiraceae_bacterium_DJF_VP08k1	0.397	0.0136222	0.00583192	0.00925626
Clostridium_sp._IE5	0.4013	0.00845874	0.0149964	0.0109918
Enterobacter_sp._sw39	0.4021	0.0466269	0.000833132	0
Enterobacteriaceae_bacterium_M508	0.403	0.0347691	0.000833132	0
bacterium_mpn-isolate_group_10	0.4031	0.0145044	0.00583192	0.0034711
endophytic_bacterium_CK13	0.4033	0.0495848	0.000833132	0
streptomyces_sp._1A01564	0.4042	0.0273482	0.000833132	0
Azovibrio_sp._AV1	0.4042	0.0419564	0.000833132	0
Pantoea_sp._2B7E	0.4043	0.0469901	0.000833132	0
Pantoea_sp.	0.4044	0.0314997	0.000833132	0
Pantoea_sp._14Hsp41e	0.4044	0.0469382	0.000833132	0
Roseburia_sp._SC1011	0.4047	0.00731707	0.0149964	0.0109918
Enterobacter_pyrinus	0.4048	0.0351842	0.000833132	0
Vibrio_sp._DH36	0.4048	0.0375195	0.000833132	0
Clostridium_aff._difficile_AA1	0.405	0.0339128	0.000833132	0
actinobacterium_Aac-35	0.4051	0.0434873	0.000833132	0
Cytophaga_sp._Dex80-43	0.4052	0.030384	0.000833132	0
Clostridium_sp._4	0.4053	0.0339388	0.000833132	0
Enterobacter_sp._VTT_E-073044	0.4053	0.035807	0.000833132	0
bacterium_ES5	0.4053	0.0493773	0.000833132	0
butyrate-producing_bacterium_L2-7	0.4054	0.00703166	0.024994	0.0196696
Rhizobium_sp._ORS_1448	0.4054	0.0304878	0.000833132	0
Enterobacter_sp._CTSP29	0.4054	0.0353659	0.000833132	0
bacterium_dtb45	0.4055	0.0424235	0.000833132	0
Citrobacter_sp._F1-3	0.4056	0.0350026	0.000833132	0
bacterium_234	0.4057	0.0423197	0.000833132	0
Serratia_sp._IV-111-4	0.4057	0.0475869	0.000833132	0
Serratia_sp._BR_1-2-11	0.4058	0.0315776	0.000833132	0
Enterobacter_sp._SPh	0.4058	0.0465231	0.000833132	0
Mesorhizobium_tianshanense	0.4059	0.0304619	0.000833132	0
delta_proteobacterium_BL50	0.4059	0.030903	0.000833132	0
Veillonella_magna	0.4059	0.0345615	0.000833132	0
Klebsiella_sp._IS-J3	0.4059	0.0363259	0.000833132	0
Streptococcus_peroris	0.406	0.0337312	0.000833132	0
Enterobacter_sp._JS-48	0.406	0.0355734	0.000833132	0
Enterobacter_sp._No._35	0.406	0.0357551	0.000833132	0
Streptomyces_sp._28a-34-3	0.406	0.0433576	0.000833132	0
Enterobacter_sp._GA44-2	0.4061	0.0313181	0.000833132	0
Varibaculum_cambriense	0.4062	0.032849	0.000833132	0
Bacillus_sp._LS61	0.4062	0.033316	0.000833132	0
Sporomusa_malonica	0.4062	0.0345096	0.000833132	0
Pantoea_sp._gx-173	0.4062	0.0366632	0.000833132	0
secondary_endosymbiont_of_Trioza_magnoliae	0.4062	0.0457966	0.000833132	0
Gallibacterium_genomosp._1	0.4062	0.0481059	0.000833132	0
Streptococcus_sp._S16-08	0.4063	0.033835	0.000833132	0
bacterium_15RD	0.4063	0.037727	0.000833132	0
Pigmentiphaga_kullae	0.4064	0.0415413	0.000833132	0
swine_fecal_bacterium_RF3E-Xyl3	0.4064	0.0498962	0.000833132	0
Cellulomonas_sp._m6-35	0.4065	0.0328749	0.000833132	0
Wigglesworthia_glossinidia	0.4065	0.0373378	0.000833132	0
Arthrobacter_polychromogenes	0.4067	0.0272185	0.000833132	0
Streptococcus_sp._EO2001-01	0.4067	0.0289829	0.000833132	0
bacterium_SFS2-2-1	0.4067	0.0379865	0.000833132	0
bacterium_RK80_tank	0.4067	0.0423716	0.000833132	0
Clostridium_sp._CYP7	0.4068	0.0295537	0.000833132	0
Propionibacterium_propionicum	0.4068	0.0393358	0.000833132	0
Collimonas_sp._CTO_94	0.4068	0.0418267	0.000833132	0
Staphylococcus_haemolyticus	0.4068	0.0436689	0.000833132	0
Pseudomonas_sp._sc-2	0.4068	0.048521	0.000833132	0
human_oral_bacterium_C5	0.4068	0.0496886	0.000833132	0
Bacteroides_sp._DJF_B097	0.4069	0.0386352	0.000833132	0.00289258
Azoarcus_communis	0.4069	0.0419045	0.000833132	0
Enterobacteriaceae_bacterium_M514	0.4069	0.0456149	0.000833132	0
Bisgaard_Taxon_7	0.4069	0.0478204	0.000833132	0
Serratia_sp._I26	0.407	0.0369746	0.000833132	0
bacterium_S119(2009)	0.407	0.0379606	0.000833132	0
Micrococcus_sp._85_TW	0.407	0.0393098	0.000833132	0
Parabacteroides_sp._DJF_B086	0.407	0.039725	0.000833132	0.00289258
Shewanella_sp._Iso-W9	0.407	0.0454852	0.000833132	0
Bacteroides_finegoldii	0.4071	0.000492994	0.464888	0.487111
Shigella_sp._EE2	0.4071	0.0372081	0.000833132	0
Eubacterium_sulci	0.4071	0.0413337	0.000833132	0
Arsenophonus_endosymbiont_of_Trialeurodes_hutchingsi	0.4071	0.0458225	0.000833132	0
Vibrio_lentus	0.4071	0.0485989	0.000833132	0
Enterobacter_sp._9B_2	0.4072	0.0312922	0.000833132	0
coliform_bacterium_Sc8	0.4072	0.0322003	0.000833132	0
Staphylococcus_carnosus	0.4072	0.0333679	0.000833132	0
Pedobacter_sp._b3W6a-b1	0.4072	0.0402698	0.000833132	0
anaerobic_bacterium_B122	0.4072	0.0422678	0.000833132	0
Elbe_River_snow_isolate_Iso15_4	0.4072	0.0441619	0.000833132	0
Clostridium_sp._AL02-5	0.4072	0.0444992	0.000833132	0
Klebsiella_sp._KG1	0.4072	0.0468085	0.000833132	0
Bacillus_coahuilensis	0.4073	0.0282564	0.000833132	0
Streptococcus_sp.	0.4073	0.0289569	0.000833132	0
Clostridium_algidicarnis	0.4073	0.0292942	0.000833132	0
bacterium_ST6	0.4073	0.0380384	0.000833132	0
soybean_epiphytic_bacterium_EP92	0.4073	0.0384276	0.000833132	0
Cytophagales_str._MED9	0.4073	0.0403996	0.000833132	0
unidentified_bacterium_ZF1	0.4073	0.0427089	0.000833132	0
Clostridium_populeti	0.4073	0.0444214	0.000833132	0
Escherichia_sp._7CR	0.4073	0.0467047	0.000833132	0
Bacillus_sp._HZ08	0.4074	0.0283861	0.000833132	0
Clostridium_purinilyticum	0.4074	0.029424	0.000833132	0
Sporacetigenium_mesophilum	0.4074	0.0297094	0.000833132	0
soybean_epiphytic_bacterium_EP405	0.4074	0.0384017	0.000833132	0
Brevibacterium_sp._HPC407	0.4074	0.0391801	0.000833132	0
Clostridium_sp._PPf35L1	0.4074	0.0412039	0.000833132	0
Klebsiella_sp._MSI78	0.4074	0.0468345	0.000833132	0
Vibrio_sp._6F5	0.4074	0.0487286	0.000833132	0
Shigella_sp._RI44	0.4075	0.0372859	0.000833132	0
Capnocytophaga_sp._AHN9576	0.4075	0.0401142	0.000833132	0
Bacillus_sp._Bt11_OTU1	0.4075	0.0405812	0.000833132	0
Ureibacillus_terrenus	0.4075	0.043643	0.000833132	0
Clostridium_sp._R1	0.4075	0.0448106	0.000833132	0
Acidovorax_defluvii	0.4075	0.0450701	0.000833132	0
Escherichia_sp._FH12	0.4075	0.0467307	0.000833132	0
Serratia_sp._DIV038	0.4075	0.0474831	0.000833132	0
Shigella_sp._MAC17169	0.4076	0.03726	0.000833132	0
soybean_endophytic_bacterium_EN193	0.4076	0.0383757	0.000833132	0
Streptomyces_malachiticus	0.4076	0.0393876	0.000833132	0
Tuber_borchii_symbiont_b-Z43	0.4076	0.0404515	0.000833132	0
Enterobacteriaceae_bacterium_RR45	0.4076	0.0456668	0.000833132	0
Streptococcus_minor	0.4077	0.028905	0.000833132	0
Eubacterium_minutum	0.4077	0.0298391	0.000833132	0
Escherichia_sp._ML2-46	0.4077	0.0361183	0.000833132	0
swine_fecal_bacterium_RF2C-Xyl1	0.4077	0.0384795	0.000833132	0
Paraeggerthella_hongkongensis	0.4077	0.0396212	0.000833132	0
Chryseobacterium_sp._ABc1	0.4077	0.0401661	0.000833132	0
Bacillus_sp._WPCB093	0.4077	0.0406331	0.000833132	0
Pseudoalteromonas_tunicata	0.4077	0.0420602	0.000833132	0
bacterium_005-3	0.4077	0.0422937	0.000833132	0
Enterobacter_sp._B294	0.4077	0.0461858	0.000833132	0
Enterobacter_sp._CK69	0.4077	0.0462377	0.000833132	0
Pantoea_sp._GJT-8	0.4077	0.0471718	0.000833132	0
Shigella_sp._4091	0.4077	0.0476907	0.000833132	0
Vibrio_sp._C22-B	0.4077	0.0488324	0.000833132	0
bacterium_DR304	0.4077	0.0493513	0.000833132	0
Enterococcus_sp._DME	0.4078	0.0287494	0.000833132	0
Clostridium_sp._X9	0.4078	0.0296575	0.000833132	0
Enterobacteriaceae_bacterium_Smarlab_3302238	0.4078	0.0310846	0.000833132	0
Enterobacter_sp._092808	0.4078	0.0312403	0.000833132	0
bacterium_T7	0.4078	0.0320446	0.000833132	0
Paenibacillus_assamensis	0.4078	0.040685	0.000833132	0
Clostridium_clariflavum	0.4078	0.0410223	0.000833132	0
Bifidobacterium_mongoliense	0.4078	0.0433835	0.000833132	0
Holdemania_filiformis	0.4078	0.0450182	0.000833132	0
Enterobacter_sp._C30-4	0.4078	0.0462117	0.000833132	0
Haemophilus_sp.	0.4078	0.0481578	0.000833132	0
Vibrio_azureus	0.4078	0.0485729	0.000833132	0
Gram-positive_bacterium_str._13-2	0.4079	0.027452	0.000833132	0
Marinilactibacillus_piezotolerans	0.4079	0.0286975	0.000833132	0
Idiomarina_loihiensis	0.4079	0.0309808	0.000833132	0
Enterobacteriaceae_bacterium_HH31	0.4079	0.0455631	0.000833132	0
Avibacterium_sp._MCCM_01291	0.4079	0.048054	0.000833132	0
Pasteurella_sp._V4	0.4079	0.0483653	0.000833132	0
Vibrio_sp._GAS2	0.4079	0.0488583	0.000833132	0
Streptococcus_sp._oral_strain_T1-E5	0.408	0.0290348	0.000833132	0
Finegoldia_magna	0.408	0.0297613	0.000833132	0
Burkholderia_sp._OX-01	0.408	0.0306435	0.000833132	0
Serratia_sp._FLGB20	0.408	0.0369486	0.000833132	0
Shigella_sp._ER.1.23	0.408	0.037234	0.000833132	0
bacterium_CWISO16	0.408	0.0378568	0.000833132	0
bacterium_Te93R	0.408	0.0380643	0.000833132	0
Achromobacter_sp._PCL5	0.408	0.0415153	0.000833132	0
Vibrio_sp._S4235	0.408	0.042138	0.000833132	0
Serratia_sp._III-082-22	0.408	0.047561	0.000833132	0
Bacillus_clausii	0.4081	0.0282304	0.000833132	0
Turicibacter_sanguinis	0.4081	0.0303321	0.000833132	0
Enterobacter_sp._P-6-12d	0.4081	0.031396	0.000833132	0
Pyramidobacter_piscolens	0.4081	0.0318111	0.000833132	0
Streptococcus_sp._C166	0.4081	0.033809	0.000833132	0
Enterobacter_sp._CTSP22	0.4081	0.0353399	0.000833132	0
Serratia_sp._R-1_R-1	0.4081	0.0370005	0.000833132	0
Ferrimonas_balearica	0.4081	0.0454074	0.000833132	0
Enterobacter_sp._3.1.1.C	0.4081	0.0461079	0.000833132	0
gamma_proteobacterium_Hp20b	0.4081	0.0491437	0.000833132	0
Enterobacter_sp._LQ-G	0.4082	0.0356253	0.000833132	0
Shigella_sp._121405	0.4082	0.0370524	0.000833132	0
bacterium_SM_3	0.4082	0.0380125	0.000833132	0
Paenibacillus_pabuli	0.4082	0.0407628	0.000833132	0
Streptococcus_merionis	0.4082	0.0439284	0.000833132	0
Pseudoalteromonas_atlantica	0.4082	0.0454333	0.000833132	0
Pantoea_sp._P12	0.4082	0.0472237	0.000833132	0
endophytic_bacterium_CK07	0.4082	0.0495589	0.000833132	0
Bacillus_sp._459-1	0.4083	0.0283342	0.000833132	0
Marinobacter_sp.	0.4083	0.0309549	0.000833132	0
Halomonas_sp._WED11C	0.4083	0.0316554	0.000833132	0
Escherichia_sp._B4	0.4083	0.0360924	0.000833132	0
Providencia_burhodogranariea	0.4083	0.0367151	0.000833132	0
marine_bacterium_CS-74	0.4083	0.038246	0.000833132	0
Corynebacterium_argentoratense	0.4083	0.039206	0.000833132	0
Chryseobacterium_sp._NF_1101	0.4083	0.040192	0.000833132	0
Bacillus_sp._JZHS20	0.4083	0.0406072	0.000833132	0
Enterobacter_sp._B11-352	0.4083	0.0461598	0.000833132	0
Enterobacter_sp._MBCC40262	0.4083	0.0464712	0.000833132	0
Enterobacter_sp._sb-3	0.4083	0.0466009	0.000833132	0
Hafnia_sp._HHS28	0.4083	0.0467826	0.000833132	0
Vibrio_tasmaniensis	0.4083	0.04904	0.000833132	0
Lactobacillus_sp._SD2	0.4084	0.0335496	0.000833132	0
Lactobacillus_alimentarius	0.4084	0.0438246	0.000833132	0
Citrobacter_sp._yy-21	0.4084	0.0460301	0.000833132	0
endosymbiont_RT12_of_Lyrodus_pedicellatus	0.4084	0.0490919	0.000833132	0
Clostridium_sp._rennanqilfy3	0.4085	0.0341982	0.000833132	0
Enterobacter_sp._6IX/A01/151	0.4085	0.0352621	0.000833132	0
Frankia_sp.	0.4085	0.039232	0.000833132	0
Variovorax_sp._S717-12	0.4085	0.0418007	0.000833132	0
rape_rhizosphere_bacterium_m9092	0.4085	0.0426051	0.000833132	0
Clostridium_sp._B8	0.4085	0.044603	0.000833132	0
Vibrio_sp._UOH-69	0.4085	0.0489102	0.000833132	0
Vibrio_sp._WH250	0.4085	0.0489881	0.000833132	0
Enterobacter_sp._HY241	0.4086	0.0355215	0.000833132	0
bacterium_EI27	0.4086	0.0379087	0.000833132	0
Algoriphagus_sp._SED17	0.4086	0.0402439	0.000833132	0
Antarctic_seawater_bacterium_Bsw10180	0.4086	0.0422418	0.000833132	0
Simplicispira_metamorpha	0.4086	0.0451738	0.000833132	0
Bisgaard_Taxon_37	0.4086	0.0477945	0.000833132	0
Nicoletella_semolina	0.4086	0.0483134	0.000833132	0
bacterium_PB90-2	0.4087	0.0280488	0.000833132	0
Epulopiscium_sp._N.l._2_clone_1	0.4087	0.0291386	0.000833132	0
Arctic_sea_ice_bacterium_ARK10108	0.4087	0.0309289	0.000833132	0
Shewanella_sp._TB_31	0.4087	0.0310327	0.000833132	0
Enterobacter_sp._638	0.4087	0.0312662	0.000833132	0
Clostridium_sp._T1'2	0.4087	0.0325636	0.000833132	0.00289258
Streptomyces_sp._BC597	0.4087	0.0394395	0.000833132	0
low_G+C_Gram-positive_bacterium_MPD-67	0.4087	0.0414894	0.000833132	0
Herbaspirillum_rhizosphaerae	0.4087	0.0418526	0.000833132	0
Clostridiisalibacter_paucivorans	0.4087	0.0441879	0.000833132	0
Lactobacillus_vitulinus	0.4087	0.0449922	0.000833132	0
Hydrogenophaga_flava	0.4087	0.0451479	0.000833132	0
Citrobacter_sp._AzoR-2	0.4087	0.0459004	0.000833132	0
Cronobacter_sp._040407/32	0.4087	0.046056	0.000833132	0
Erwinia_sp._MB31	0.4087	0.0466788	0.000833132	0
Haemophilus_sp._CCUG_24145	0.4087	0.0482097	0.000833132	0
Arctic_sea_ice_bacterium_AWS-4M2	0.4087	0.0490659	0.000833132	0
Bacillus_sp._GH10	0.4088	0.0283601	0.000833132	0
Paenibacillus_sp._DF4US9	0.4088	0.0285418	0.000833132	0
Enhydrobacter_sp._KB3-12	0.4088	0.0316814	0.000833132	0
Citrobacter_sp._VA53	0.4088	0.0351323	0.000833132	0
Bacteroidetes_bacterium_S22-34	0.4088	0.0403477	0.000833132	0
Enterobacter_sp._PW4	0.4088	0.0421121	0.000833132	0
Clostridium_sp._B910-1	0.4088	0.044629	0.000833132	0
Pasteurella_sp._4074	0.4088	0.0483394	0.000833132	0
Vibrio_sp._seaur.1.1	0.4088	0.049014	0.000833132	0
alpha_proteobacterium_ARP-E12	0.4089	0.0305138	0.000833132	0
Lactococcus_sp._G99	0.4089	0.0336015	0.000833132	0
Lactococcus_sp._YM05001	0.4089	0.0336533	0.000833132	0
Epulopiscium_sp._N.l._1_clone_20	0.4089	0.0338869	0.000833132	0
Pseudoalteromonas_sp._sxzs-2	0.4089	0.0346653	0.000833132	0
Enterobacter_sp._WAB1936	0.4089	0.0358588	0.000833132	0
Erwinia_sp._CYEB-5	0.4089	0.0359886	0.000833132	0
Pantoea_sp._BD_309	0.4089	0.0364816	0.000833132	0
Prevotellaceae_bacterium_WR041	0.4089	0.0399585	0.000833132	0
Comamonas_sp._SS-1	0.4089	0.0417748	0.000833132	0
Veillonella_sp._FHM104	0.4089	0.0449663	0.000833132	0
Salmonella_sp._D194-1	0.4089	0.0473275	0.000833132	0
rumen_bacterium_E7	0.4089	0.0497146	0.000833132	0
soybean_endophytic_bacterium_EN217	0.4089	0.0497924	0.000833132	0
Howardella_ureilytica	0.409	0.0291645	0.000833132	0
Idiomarina_sp._SB18	0.409	0.0310067	0.000833132	0
Clostridium_sp._AL03-20	0.409	0.0339647	0.000833132	0
Klebsiella_sp._I12	0.409	0.0362999	0.000833132	0
anaerobic_bacterium_B153	0.409	0.0376492	0.000833132	0
Olsenella_genomosp._C1	0.409	0.0395952	0.000833132	0
Alishewanella_sp._BL06	0.409	0.0453814	0.000833132	0
Serratia_sp._BS26	0.409	0.0474572	0.000833132	0
Serratia_sp._I-111-6	0.409	0.047535	0.000833132	0
Bisgaard_Taxon_14	0.409	0.0477426	0.000833132	0
Actinobacillus_sp._F119	0.409	0.0479761	0.000833132	0
Acinetobacter_baumannii	0.409	0.0483913	0.000833132	0
anaerobic_bacterium_B9	0.409	0.0492216	0.000833132	0
Rubrivivax_sp._14P	0.4091	0.0305397	0.000833132	0
Delftia_sp._EC-S107	0.4091	0.0307473	0.000833132	0
Bacillus_sp._CJHH10	0.4091	0.0332641	0.000833132	0
Buttiauxella_noackiae	0.4091	0.0348729	0.000833132	0
unidentified_eubacterium_clone_BSV77	0.4091	0.0386092	0.000833132	0
Clostridium_mangenotii	0.4091	0.0443695	0.000833132	0
Firmicutes_bacterium_SD1	0.4091	0.0450441	0.000833132	0
Enterobacter_sp._GIST-OutAn2	0.4091	0.0463934	0.000833132	0
sponge_bacterium_XM6	0.4091	0.0498184	0.000833132	0
Capnocytophaga_sp._VAMC_5206	0.4092	0.027945	0.000833132	0
Gemella_sp._oral_strain_C24KA	0.4092	0.0281785	0.000833132	0
Shewanella_woodyi	0.4092	0.0346912	0.000833132	0
Enterobacteriales_bacterium_LBRN-NC07	0.4092	0.0347172	0.000833132	0
Escherichia_sp._MSCB-10	0.4092	0.0361443	0.000833132	0
Acinetobacter_radioresistens	0.4092	0.0374157	0.000833132	0
Clostridium_sp._DF2C1	0.4092	0.041152	0.000833132	0
Spiroplasma_sp._CRAB	0.4092	0.0422159	0.000833132	0
Micrococcineae_bacterium_ASTYA1	0.4092	0.0430981	0.000833132	0
Streptococcus_sp._oral_strain_B5SC	0.4092	0.0440841	0.000833132	0
Aeromonas_media	0.4092	0.0453295	0.000833132	0
Cimex_lectularius_endosymbiont	0.4092	0.0455112	0.000833132	0
Enterobacteriaceae_bacterium_GA03	0.4092	0.0455371	0.000833132	0
Escherichia_sp._SC-C4-4	0.4092	0.0467566	0.000833132	0
Pectobacterium_sp._Lgg15.13	0.4092	0.0473015	0.000833132	0
Histophilus_somni	0.4092	0.0482615	0.000833132	0
Porphyromonas_sp._UQD_424	0.4093	0.0277115	0.000833132	0
Bacillus_badius	0.4093	0.0282045	0.000833132	0
Laribacter_hongkongensis	0.4093	0.0307992	0.000833132	0
Pantoea_sp._NJ-32	0.4093	0.0315516	0.000833132	0
bacterium_RSD-1-4	0.4093	0.0320187	0.000833132	0
Enterobacter_sp._NII-24a	0.4093	0.0357291	0.000833132	0
Shigella_sp._121406	0.4093	0.0370784	0.000833132	0
Staphylococcus_aureus	0.4093	0.0389465	0.000833132	0.00289258
Clostridium_sp._CYP11	0.4093	0.0411261	0.000833132	0
Paenibacillus_sp._O-4c	0.4093	0.043617	0.000833132	0
Enterobacteriaceae_bacterium_M019	0.4093	0.045589	0.000833132	0
Enterobacter_sp._M3	0.4093	0.0464453	0.000833132	0
Pantoea_sp._ATCC_27998	0.4093	0.0470161	0.000833132	0
Vibrio_sp._1D12(2008)	0.4093	0.0486767	0.000833132	0
endophytic_bacterium_C10	0.4093	0.049533	0.000833132	0
Candidatus_Haliscomenobacter_calcifugiens	0.4094	0.0279969	0.000833132	0
Thauera_aromatica	0.4094	0.0308511	0.000833132	0
anaerobic_bacterium_B158	0.4094	0.0318889	0.000833132	0
unidentified_eubacterium_clone_BSV75	0.4094	0.0324338	0.000833132	0
Clostridium_sp._H2-8	0.4094	0.0340944	0.000833132	0
Citrobacter_sp._Gc-8-a	0.4094	0.0350285	0.000833132	0
Burkholderia_sp._NGR114	0.4094	0.041671	0.000833132	0
endosymbiont_of_Alviniconcha_sp._type1	0.4094	0.0424494	0.000833132	0
Clostridium_sp._19	0.4094	0.0444473	0.000833132	0
beta_proteobacterium_MB18	0.4094	0.0452517	0.000833132	0
Candidatus_Hamiltonella_defensa	0.4094	0.0458485	0.000833132	0
Citrobacter_sp._AzoR-4	0.4094	0.0459263	0.000833132	0
Enterobacter_sp._ATCC_27982	0.4094	0.0461339	0.000833132	0
Paenibacillus_sp._WPCB023	0.4095	0.0285677	0.000833132	0
rumen_bacterium_8/9293-1A	0.4095	0.032356	0.000833132	0
Lactococcus_sp._MKFS47	0.4095	0.0336274	0.000833132	0
Klebsiella_sp._VTT_E-96668	0.4095	0.0363778	0.000833132	0
Serratia_sp._DAP5	0.4095	0.0369227	0.000833132	0
bacterium_33RD	0.4095	0.0377789	0.000833132	0
Coriobacteriaceae_bacterium_M3	0.4095	0.0395174	0.000833132	0
Ralstonia_sp._W3	0.4095	0.0417488	0.000833132	0
Leptospira_interrogans	0.4095	0.042164	0.000833132	0
Bifidobacterium_sp._PFGE_8	0.4095	0.0434613	0.000833132	0
Pantoea_sp._BPs-1	0.4095	0.047042	0.000833132	0
Halomonas_magadiensis	0.4095	0.0477167	0.000833132	0
Streptococcus_sp._Je2	0.4096	0.0290088	0.000833132	0
Clostridium_sp._C40-2	0.4096	0.0295278	0.000833132	0
Nitrosomonas_sp._Nm148	0.4096	0.0308251	0.000833132	0
Enterobacter_sp._gx-25	0.4096	0.0314478	0.000833132	0
marine_bacterium_GY27	0.4096	0.0317592	0.000833132	0
bacterium_1B8	0.4096	0.0319149	0.000833132	0
glacial_ice_bacterium_MS-T3-04	0.4096	0.0322263	0.000833132	0
Bacillus_sp._GSP69	0.4096	0.0332901	0.000833132	0
Enterococcus_sp._T261	0.4096	0.0334198	0.000833132	0
Massilia_timonae	0.4096	0.0451998	0.000833132	0
Enterobacteriaceae_bacterium_M529	0.4096	0.0456409	0.000833132	0
mycetome_symbiont_of_Placobdelloides_jaegerskioeldi	0.4096	0.0457447	0.000833132	0
Pantoea_sp._Co9941	0.4096	0.047068	0.000833132	0
Serratia_sp._DR.Y3	0.4096	0.0475091	0.000833132	0
swine_manure_pit_bacterium_PPC99	0.4096	0.0499741	0.000833132	0
Bifidobacterium_sp._group_III-3	0.4097	0.0274261	0.000833132	0
Bacterium_MPB_DPMF2	0.4097	0.031863	0.000833132	0
Enterobacter_ludwigii	0.4097	0.0351583	0.000833132	0
Enterobacter_sp._XW110	0.4097	0.0358848	0.000833132	0
Klebsiella_sp._BR-15	0.4097	0.0362221	0.000833132	0
Micrococcus_sp._R-23205	0.4097	0.0432797	0.000833132	0
Haemophilus_sp._3p5	0.4097	0.0481837	0.000833132	0
Pseudomonas_sp._sc-1	0.4097	0.0484951	0.000833132	0
gamma_proteobacterium_SSCT62	0.4097	0.0491956	0.000833132	0
bacterium_1-4	0.4097	0.0492475	0.000833132	0
Clostridiales_bacterium_r14	0.4098	0.0290867	0.000833132	0
Moorella_sp._F21	0.4098	0.0303062	0.000833132	0
bacterium_mpn-isolate_group_8	0.4098	0.0321484	0.000833132	0
Enterobacteriaceae_bacterium_OYS2	0.4098	0.034795	0.000833132	0
primary_endosymbiont_of_Pseudolynchia_canariensis	0.4098	0.0348469	0.000833132	0
Klebsiella_sp._I-Z6	0.4098	0.036274	0.000833132	0
Salmonella_sp.	0.4098	0.036767	0.000833132	0
endophytic_bacterium_C05	0.4098	0.0381681	0.000833132	0
endophytic_bacterium_Y02	0.4098	0.0381941	0.000833132	0
Bacteroides_sp._BDNS3	0.4098	0.0427348	0.000833132	0.00289258
Clostridiales_bacterium_JN18_V41_S	0.4098	0.04411	0.000833132	0
Enterobacteriaceae_bacterium_v444	0.4098	0.0456928	0.000833132	0
Enterobacter_sp._DH50-2	0.4098	0.0462636	0.000833132	0
Acinetobacter_sp._u21	0.4098	0.0484432	0.000833132	0
Vibrio_rotiferianus	0.4098	0.0486508	0.000833132	0
gamma_proteobacterium_HRG12	0.4098	0.0491178	0.000833132	0
Pantoea_sp._EB-1	0.4099	0.0315257	0.000833132	0
Citrobacter_sp._DW99	0.4099	0.0349766	0.000833132	0
Enterobacter_sp._DH40-2	0.4099	0.0353918	0.000833132	0
Ewingella_americana	0.4099	0.0361962	0.000833132	0
Vibrio_sp._CL1005	0.4099	0.0374935	0.000833132	0
Coriobacterium_sp._CCUG_33918	0.4099	0.0395433	0.000833132	0
beta_proteobacterium_JN18_V62_Y	0.4099	0.0419824	0.000833132	0
Clostridium_sp._HT17	0.4099	0.0447068	0.000833132	0
Clostridium_sp._SH-C10	0.4099	0.0448625	0.000833132	0
Enterobacteriaceae_bacterium_GK-2	0.41	0.0310586	0.000833132	0
rumen_bacterium_2/9293-15	0.41	0.03233	0.000833132	0
swine_fecal_bacterium_FPC69	0.41	0.0323819	0.000833132	0
Streptococcus_phocae	0.41	0.0337571	0.000833132	0
Erwinia_toletana	0.41	0.0360405	0.000833132	0
Escherichia_sp._ZHS050714	0.41	0.0361702	0.000833132	0
bacterium_spbL3type3	0.41	0.0381162	0.000833132	0
marine_bacterium_CS-2	0.41	0.03822	0.000833132	0
Bacteroidetes_bacterium_DQHS-4	0.41	0.0403217	0.000833132	0
Morganella_morganii	0.41	0.0469123	0.000833132	0
Acidovorax_valerianellae	0.4101	0.0307213	0.000833132	0
bacterium_G2	0.4101	0.0319668	0.000833132	0
Paenibacillus_sp._PALXIL11	0.4101	0.033342	0.000833132	0
Escherichia_sp._4094	0.4101	0.0360664	0.000833132	0
Raoultella_planticola	0.4101	0.036741	0.000833132	0
anaerobic_bacterium_B178	0.4101	0.0376751	0.000833132	0
Sphingobacterium_sp._H105	0.4101	0.0402958	0.000833132	0
Clostridium_sp._NB12	0.4101	0.041178	0.000833132	0
Pantoea_sp._G6	0.4101	0.0471458	0.000833132	0
bacterium_17-CDL1	0.4101	0.0493254	0.000833132	0
Porphyromonas_sp._UQD_414	0.4102	0.0276855	0.000833132	0
Exiguobacterium_sp._REI_89	0.4102	0.0281526	0.000833132	0
Paenibacillus_antarcticus	0.4102	0.0284639	0.000833132	0
Clostridium_sp._NB17	0.4102	0.0296316	0.000833132	0
Enterobacteriaceae_bacterium_KVD-1959-07	0.4102	0.0347431	0.000833132	0
Citrobacter_sp._DHRSS	0.4102	0.0349507	0.000833132	0
Salmonella_sp._2	0.4102	0.0368448	0.000833132	0
rumen_bacterium_A54	0.4102	0.0382979	0.000833132	0
Burkholderia_multivorans	0.4102	0.041645	0.000833132	0
beta_proteobacterium_pCyN2	0.4102	0.0420083	0.000833132	0
Sedimentibacter_hongkongensis	0.4102	0.0448884	0.000833132	0
secondary_endosymbiont_of_Bemisia_tabaci	0.4102	0.0457706	0.000833132	0
Pantoea_sp._EM15cb	0.4102	0.0470939	0.000833132	0
Candidatus_Serratia_symbiotica	0.4102	0.0473793	0.000833132	0
Serratia_sp._ST-2-08	0.4102	0.0476648	0.000833132	0
Vibrio_parahaemolyticus	0.4102	0.0486248	0.000833132	0
endophytic_bacterium_CR1b	0.4102	0.0496108	0.000833132	0
Pantoea_sp._FP-1	0.4103	0.0365594	0.000833132	0
anaerobic_bacterium_A131	0.4103	0.0376232	0.000833132	0
Prevotella_bivia	0.4103	0.038713	0.000833132	0.00289258
Burkholderia_ambifaria	0.4103	0.0415672	0.000833132	0
Leuconostoc_sp._F12	0.4103	0.0438505	0.000833132	0
Acidovorax_sp._W-O7-2	0.4103	0.045096	0.000833132	0
Citrobacter_sp._RR	0.4103	0.0459782	0.000833132	0
bovine_rumen_bacterium_JPR11	0.4103	0.0494811	0.000833132	0
Streptomyces_sp._IM-8073	0.4104	0.0272963	0.000833132	0
Gallicola_barnesae	0.4104	0.0297872	0.000833132	0
Burkholderiaceae_bacterium_KF045	0.4104	0.0305656	0.000833132	0
Streptococcus_genomosp._C8	0.4104	0.0336793	0.000833132	0
Firmicutes_bacterium_10827	0.4104	0.0345874	0.000833132	0
Bacillus_longisporus	0.4104	0.0405293	0.000833132	0
Trichococcus_sp._R210	0.4104	0.0437208	0.000833132	0
Enterobacter_sp._DIV118	0.4104	0.0462896	0.000833132	0
gamma_proteobacterium_RBE2CD-47	0.4104	0.0491697	0.000833132	0
endophytic_bacterium_HB04	0.4104	0.0496627	0.000833132	0
Streptococcus_sp._1606-02B	0.4105	0.0337831	0.000833132	0
Enterobacter_sp._FM9	0.4105	0.0354696	0.000833132	0
Cryptobacterium_curtum	0.4105	0.0395693	0.000833132	0
Porphyromonas_sp._403-8	0.4105	0.0398028	0.000833132	0
Myroides_odoratus	0.4105	0.040218	0.000833132	0
Enterococcus_sp._Egh	0.4105	0.0437987	0.000833132	0
Enterobacter_sp._JA11	0.4105	0.0464193	0.000833132	0
Pantoea_sp._NIIST-167	0.4105	0.0471977	0.000833132	0
Firmicutes_bacterium_M53	0.4106	0.0303581	0.000833132	0.00289258
Burkholderia_sp._CI1	0.4106	0.0306175	0.000833132	0
benzene-decomposing_bacterium_S5	0.4106	0.0321744	0.000833132	0
Desulfovibrio_desulfuricans	0.4106	0.0420343	0.000833132	0
Clostridium_haemolyticum	0.4106	0.0443176	0.000833132	0
Klebsiella_sp._XJ1	0.4106	0.0468864	0.000833132	0
Vibrio_sp._A7CMCS02	0.4106	0.0487805	0.000833132	0
Micromonospora_sp._161522	0.4107	0.0272444	0.000833132	0
Candidatus_Burkholderia_nigropunctata	0.4107	0.0306694	0.000833132	0
Enterobacter_sp._NSJ-4	0.4107	0.03137	0.000833132	0
Klebsiella_sp._T-6-1	0.4107	0.0314738	0.000833132	0
rumen_bacterium_15/9293-13	0.4107	0.0323041	0.000833132	0
Actinomyces_sp._oral_strain_Hal-1065	0.4107	0.0327971	0.000833132	0
Mobiluncus_mulieris	0.4107	0.032823	0.000833132	0
human_intestinal_bacterium_SNU-Julong732	0.4107	0.0330306	0.000833132	0
Enterococcus_sp._QMA-27TR	0.4107	0.0333939	0.000833132	0
Desulfotomaculum_guttoideum	0.4107	0.0342761	0.000833132	0
Enterobacter_sp._JA07	0.4107	0.0355475	0.000833132	0
Enterobacter_sp._LCR81	0.4107	0.0355994	0.000833132	0
Shigella_sp._BARD11	0.4107	0.0371303	0.000833132	0
Streptococcus_sp._C151	0.4107	0.0439803	0.000833132	0
Acinetobacter_sp._QN6	0.4107	0.0484172	0.000833132	0
Vibrio_sp._8-1	0.4107	0.0487545	0.000833132	0
obligately_oligotrophic_bacteria_POCPN-74	0.4108	0.0280747	0.000833132	0
Paenibacillus_sp._DF4SR4	0.4108	0.0285158	0.000833132	0
Clostridiaceae_bacterium_rennanqilyf12	0.4108	0.0292423	0.000833132	0
Bifidobacterium_gallicum	0.4108	0.0329009	0.000833132	0
Bifidobacterium_sp._DJF_RP64k1	0.4108	0.0329787	0.000833132	0
Lactobacillus_faeni	0.4108	0.0334458	0.000833132	0
Erwinia_sp._EI1-02-9	0.4108	0.0360145	0.000833132	0
Salmonella_sp._'group_B'	0.4108	0.0367929	0.000833132	0
Shigella_sp._5	0.4108	0.0371043	0.000833132	0
bacterium_2-TKL1	0.4108	0.037753	0.000833132	0
bacterium_Bm26	0.4108	0.0378308	0.000833132	0
swine_fecal_bacterium_RF2B-Xyl5	0.4108	0.0384536	0.000833132	0
Arthrobacter_sp._Bt_43	0.4108	0.0392579	0.000833132	0
Bacillus_sp._CCBAU_13246	0.4108	0.0435651	0.000833132	0
Clostridium_sp._AL08-17	0.4108	0.0445511	0.000833132	0
Citrobacter_gillenii	0.4108	0.0458744	0.000833132	0
Vibrio_sp._UST061013-006	0.4108	0.0489362	0.000833132	0
Enterococcus_sp._QMA-24TR	0.4109	0.0287753	0.000833132	0
Veillonella_ratti	0.4109	0.0302283	0.000833132	0
Enterobacter_sp._2B7A	0.4109	0.0352361	0.000833132	0
Pantoea_sp._IC4111	0.4109	0.0365854	0.000833132	0
Proteus_mirabilis	0.4109	0.0366892	0.000833132	0
Salmonella_sp._10	0.4109	0.0368189	0.000833132	0
Streptococcus_sp._VA10345_05	0.4109	0.0440581	0.000833132	0
Elbe_River_snow_isolate_Iso11_1	0.4109	0.044136	0.000833132	0
Citrobacter_sp._NB1	0.4109	0.0459523	0.000833132	0
Enterobacter_sp._Z-3	0.4109	0.046575	0.000833132	0
bacterium_KA55	0.4109	0.0494032	0.000833132	0
bacterium_UASWS0103	0.411	0.0320706	0.000833132	0
Bacillus_sp._'Mali_58'	0.411	0.0332122	0.000833132	0
Streptococcaceae_bacterium_RF32	0.411	0.0335755	0.000833132	0
Enterobacter_sp._CO_8-9	0.411	0.035314	0.000833132	0
bacterium_B39	0.411	0.0378049	0.000833132	0
Paenibacillus_graminis	0.411	0.0407369	0.000833132	0
Parvimonas_sp._oral_taxon_110	0.411	0.0412818	0.000833132	0
Enterococcus_sp._CCM4360	0.411	0.0437727	0.000833132	0
Diaphorobacter_sp._FS-YC6695	0.411	0.045122	0.000833132	0
Alishewanella_sp._430	0.411	0.0453555	0.000833132	0
swine_manure_bacterium_RT-3B	0.411	0.0499481	0.000833132	0
Bifidobacterium_sp._BBDP69	0.4111	0.0273742	0.000833132	0
Kluyvera_sp._Tf_250	0.4111	0.0364037	0.000833132	0
bacterium_HY-42-22	0.4111	0.0409704	0.000833132	0
Nitrosospira_sp._L115	0.4111	0.0418786	0.000833132	0
mastodon_intestinal_bacterium_18.37.BG.2	0.4111	0.0457187	0.000833132	0
Serratia_sp._PRGB09	0.4111	0.0476129	0.000833132	0
soil_bacterium_PM6-P2-6	0.4111	0.0497665	0.000833132	0
Moellerella_wisconsensis	0.4112	0.0364297	0.000833132	0
Pantoea_deleyi	0.4112	0.0364556	0.000833132	0
Streptococcus_alactolyticus	0.4112	0.0438765	0.000833132	0
Enterobacter_sp._TM1_4	0.4112	0.046549	0.000833132	0
Clostridium_thermocellum	0.4113	0.0296834	0.000833132	0.00289258
bacterium_MACB	0.4113	0.0311105	0.000833132	0
Enterobacter_sp._IPPW-31	0.4113	0.0313441	0.000833132	0
Enterobacter_sp._090508	0.4113	0.0352102	0.000833132	0
Xenorhabdus_bovienii	0.4113	0.0373638	0.000833132	0
marine_bacterium_SIMO-4463	0.4113	0.0382719	0.000833132	0
human_oral_bacterium_C64	0.4113	0.0425013	0.000833132	0.00289258
Campylobacter_concisus	0.4113	0.0453036	0.000833132	0
Clostridium_neonatale	0.4114	0.029398	0.000833132	0
haloalkaliphilic_bacterium_EMB4	0.4114	0.0331863	0.000833132	0
Centipeda_periodontii	0.4114	0.0344837	0.000833132	0
bacterium_UASWS0098	0.4114	0.0380903	0.000833132	0
swine_fecal_bacterium_RF3F-Cel3	0.4114	0.0385314	0.000833132	0
Lactobacillus_sanfranciscensis	0.4114	0.0408666	0.000833132	0
Clostridium_sp._AL05-6	0.4114	0.0445252	0.000833132	0
Clostridium_sp._AL08-2	0.4114	0.0445771	0.000833132	0
Citrobacter_sp._SR3	0.4114	0.0460042	0.000833132	0
Erwinia_sp._EI1-02-24	0.4114	0.0466528	0.000833132	0
Actinobacillus_indolicus	0.4114	0.0479242	0.000833132	0
Fructobacillus_ficulneus	0.4115	0.0288531	0.000833132	0
Acetobacterium_carbinolicum	0.4115	0.0298132	0.000833132	0
Enterobacter_sp._WAB1903	0.4115	0.0358329	0.000833132	0
human_oral_bacterium_C65	0.4115	0.0425272	0.000833132	0.00289258
Streptococcus_genomosp._C4	0.4115	0.0439024	0.000833132	0
Vibrio_sp._2.3.052DS3	0.4115	0.0487026	0.000833132	0
Clostridium_sp._AL04-17	0.4116	0.0339907	0.000833132	0
Enterobacter_sp._GIST-NKst3	0.4116	0.0354956	0.000833132	0
Enterobacter_sp._M60-2	0.4116	0.0357032	0.000833132	0
Klebsiella_sp._SA3	0.4116	0.0363518	0.000833132	0
Salmonella_sp._D187-2	0.4116	0.0368967	0.000833132	0
Shigella_sp._BBDP81	0.4116	0.0371821	0.000833132	0
groundwater_biofilm_bacterium_S3	0.4116	0.0424754	0.000833132	0
Brevibacillus_borstelensis	0.4116	0.0435911	0.000833132	0
Enterobacter_sp._EB44	0.4116	0.0463415	0.000833132	0
Enterobacter_sp._S6BB	0.4116	0.0464971	0.000833132	0
Citrobacter_amalonaticus	0.4117	0.0349248	0.000833132	0
Enterobacter_sp._DI	0.4117	0.0354177	0.000833132	0
Pantoea_sp._PR1.5/2	0.4117	0.0366373	0.000833132	0
Shigella_sp._T47091	0.4117	0.0373119	0.000833132	0
Brevibacillus_limnophilus	0.4117	0.0406591	0.000833132	0
Cellulomonas_hominis	0.4117	0.0432278	0.000833132	0
Clostridium_argentinense	0.4117	0.0442138	0.000833132	0
Clostridium_sp._AG07-5	0.4117	0.0444733	0.000833132	0
Clostridium_sp._SH-C1	0.4117	0.0448365	0.000833132	0
Vibrio_sp._MS1010	0.4117	0.0488843	0.000833132	0
Clostridium_sp._AL03-6	0.4118	0.0294759	0.000833132	0
Clostridium_sp._Kas203-2	0.4118	0.0296056	0.000833132	0.00289258
selenate-reducing_bacterium_TSA	0.4118	0.0311365	0.000833132	0
symbiont_of_Myzocallis_sp.	0.4118	0.0311624	0.000833132	0
Desulfotomaculum_sp._CYP1	0.4118	0.034328	0.000833132	0.00231406
Enterobacter_sp._p2-6+1	0.4118	0.0359107	0.000833132	0
coliform_bacterium_S1/2	0.4118	0.0381422	0.000833132	0
Pasteurellaceae_bacterium_C67	0.4118	0.0478983	0.000833132	0
Prevotella_sp._HB6	0.4119	0.0278412	0.000833132	0
Linmingia_china	0.4119	0.0342242	0.000833132	0
Burkholderia_sp._YS1	0.4119	0.0416969	0.000833132	0
Veillonella_sp._NVG_84cf	0.412	0.0302543	0.000833132	0
Polynucleobacter_necessarius	0.412	0.0306954	0.000833132	0
Firmicutes_str._C34	0.412	0.0327193	0.000833132	0.00231406
Citrobacter_sp._JEK-2009	0.412	0.0350804	0.000833132	0
gamma_proteobacterium_pp5a	0.412	0.0375973	0.000833132	0
Staphylococcus_sp._TM18_8	0.412	0.0407888	0.000833132	0
rainbow_trout_intestinal_bacterium_D35	0.412	0.0408147	0.000833132	0
Clostridium_sp._BG-C124	0.412	0.0411002	0.000833132	0
Haemophilus_sp._CCUG_32367	0.412	0.0482356	0.000833132	0
bacterium_110	0.412	0.0492994	0.000833132	0
swine_fecal_bacterium_RF2B-Pec1	0.412	0.0498703	0.000833132	0
Citrobacter_TNT4	0.4121	0.0348988	0.000833132	0
Parabacteroides_johnsonii	0.4121	0.039699	0.000833132	0.00289258
Spiroplasma_sp.	0.4121	0.0421899	0.000833132	0
Pantoea_sp._1S3	0.4121	0.0469642	0.000833132	0
Pasteurella_aerogenes_MCCM_01550	0.4121	0.0478723	0.000833132	0
Mannheimia_sp._HPA121	0.4121	0.0482875	0.000833132	0
bacterium_UASWS0127	0.4121	0.0494292	0.000833132	0
Arthronema_africanum	0.4122	0.0281266	0.000833132	0
Enterobacter_sp._M233	0.4122	0.0356772	0.000833132	0
mixed_culture_ruminal_bacterium_PAD71	0.4122	0.0396731	0.000833132	0.00289258
Bacillus_polyfermenticus	0.4122	0.0405553	0.000833132	0
Rothia_sp._J03	0.4122	0.0433316	0.000833132	0
Streptococcus_sp._I5	0.4122	0.0440322	0.000833132	0
Serratia_sp._I-111-21	0.4123	0.0316035	0.000833132	0
Enterobacter_sp._M2	0.4123	0.0356513	0.000833132	0
Enterobacter_sp._DIV158	0.4123	0.0463155	0.000833132	0
Serratia_sp._L8b	0.4124	0.0316295	0.000833132	0
Thiomicrospira_arctica	0.4124	0.0317333	0.000833132	0
Citrobacter_sp._I91-10	0.4124	0.0350545	0.000833132	0
Streptomyces_microflavus	0.4124	0.0394136	0.000833132	0
Streptomyces_thermotolerans	0.4124	0.0394655	0.000833132	0
Serratia_sp._210_29	0.4124	0.0474312	0.000833132	0
Vibrio_sp._AO1	0.4124	0.0488064	0.000833132	0
Caulobacteraceae_bacterium_WH143	0.4125	0.03041	0.000833132	0
Pantoea_sp._FL106	0.4125	0.0365335	0.000833132	0
Bacteroidetes_bacterium_SM32	0.4125	0.0403736	0.000833132	0
Psychrobacter_jeotgali	0.4125	0.0484691	0.000833132	0
Vibrio_alginolyticus	0.4125	0.048547	0.000833132	0
bacterium_mpn-isolate_group_16	0.4126	0.00980799	0.0108307	0.0150414
Clostridium_sp._3-9	0.4126	0.0294499	0.000833132	0
Enterobacter_amnigenus	0.4126	0.0312143	0.000833132	0
bacterium_#WM-B26	0.4126	0.0377011	0.000833132	0
swine_fecal_bacterium_RF3D-Xyl1	0.4126	0.0385054	0.000833132	0
Clostridium_diolis	0.4126	0.0442916	0.000833132	0.00231406
Enterobacter_sp._2B8C	0.4126	0.046082	0.000833132	0
swine_fecal_bacterium_RF1A-Xyl2	0.4126	0.0498443	0.000833132	0
Erwinia_pyrifoliae	0.4127	0.0359367	0.000833132	0
Streptomyces_canus	0.4127	0.0393617	0.000833132	0
bacterium_CCSD_DF2030_Ag68_isolate_2	0.4127	0.0423456	0.000833132	0
Eubacterium_sp._C124b	0.4127	0.0429943	0.000833132	0.00289258
Pantoea_sp._Ward	0.4127	0.0472756	0.000833132	0
Brevibacillus_sp._P258	0.4128	0.028412	0.000833132	0
Lactobacillus_sp._NIR7	0.4128	0.0288272	0.000833132	0
Vibrio_sp._W15	0.4128	0.0375454	0.000833132	0
Chryseobacterium_indologenes	0.4128	0.0401401	0.000833132	0
Brevibacterium_sp._h47	0.4128	0.0432019	0.000833132	0
endophytic_bacterium_HA03	0.4128	0.0496367	0.000833132	0
Streptococcus_genomosp._C6	0.4129	0.0288791	0.000833132	0
Propionispora_hippei	0.4129	0.0301505	0.000833132	0
Pantoea_sp._Jp3-3	0.4129	0.0366113	0.000833132	0
Gallibacterium_melopsittaci	0.4129	0.0481318	0.000833132	0
bacterium_YC-8	0.4129	0.0494551	0.000833132	0
Pantoea_sp._CC-KM6-1	0.413	0.0365075	0.000833132	0
bacterium_ISW_15	0.413	0.0379346	0.000833132	0
Ralstonia_sp._161	0.413	0.0417229	0.000833132	0
Pseudoalteromonas_sp._sxzs-6	0.413	0.0454593	0.000833132	0
Serratia_fonticola	0.413	0.0474053	0.000833132	0
thermal_spring_bacterium_1C	0.4131	0.0385833	0.000833132	0
swine_manure_pit_bacterium_PPC12A	0.4131	0.0426829	0.000833132	0
Clostridium_sp._pc1	0.4132	0.0102491	0.0108307	0.0144629
Cycloclasticus_sp._G	0.4132	0.0317073	0.000833132	0
bacterium_Bm21	0.4132	0.0319408	0.000833132	0
Aeromonas_sobria	0.4132	0.0346393	0.000833132	0
Citrobacter_sp._PHA-M3	0.4132	0.0351064	0.000833132	0
Klebsiella_sp._F2	0.4132	0.0362481	0.000833132	0
soil_bacterium_Levo-S1T-M1LLLSSL-2	0.4132	0.0383498	0.000833132	0
Porphyromonas_sp._UQD_451	0.4132	0.0398806	0.000833132	0
Azoarcus_tolulyticus	0.4132	0.0419305	0.000833132	0
Arthrobacter_sp._32c	0.4132	0.0432538	0.000833132	0
Klebsiella_sp._SO-Y1-2	0.4132	0.0468604	0.000833132	0
Salmonella_sp._LFW070403	0.4132	0.0473534	0.000833132	0
Streptomyces_sp._SSL07	0.4133	0.0273223	0.000833132	0
Staphylococcus_sp._NA19	0.4134	0.0286196	0.000833132	0
Staphylococcus_sp._W52	0.4134	0.0286456	0.000833132	0
Thermohalobacter_berrensis	0.4134	0.0342501	0.000833132	0
Enterobacter_sp._TUT1390	0.4134	0.035781	0.000833132	0
Vibrionaceae_bacterium_DS3	0.4134	0.0374416	0.000833132	0
Lachnospiraceae_bacterium_6-1	0.4134	0.0413596	0.000833132	0.00289258
Enterobacter_sp._G-2-10-2	0.4134	0.0463674	0.000833132	0
Actinobacillus_sp._4069	0.4134	0.0479502	0.000833132	0
Avibacterium_sp._HP202	0.4134	0.048028	0.000833132	0
bacterium_10RD	0.4134	0.0492735	0.000833132	0
Barnesiella_sp._EBA4-14	0.4135	0.0275558	0.000833132	0.00289258
Salmonella_sp._4065	0.4135	0.0368708	0.000833132	0
Cytophagales_str._QSSC5-1	0.4135	0.0404255	0.000833132	0
Pantoea_sp._SH2	0.4135	0.0472496	0.000833132	0
Bacteroides_sp._PETROMIC_H05	0.4136	0.0275039	0.000833132	0.00231406
Brucella_sp._mp-7	0.4136	0.0304359	0.000833132	0
Enterobacter_sp._SA-2	0.4136	0.0314219	0.000833132	0
Pantoea_sp._Fed13	0.4136	0.0471199	0.000833132	0
Vibrio_sp._An30N-7C-S	0.4137	0.0374676	0.000833132	0
Citrobacter_sp._CT14	0.4138	0.0311884	0.000833132	0
Prevotella_disiens	0.4138	0.038739	0.000833132	0.00231406
Enterobacter_sp._7J2	0.4139	0.035288	0.000833132	0
swine_manure_bacterium_RT-5A	0.4139	0.0385573	0.000833132	0
beta_proteobacterium_NOS8	0.4139	0.0452776	0.000833132	0
Nostoc_sp._'Pannaria_durietzii_cyanobiont'_Ch	0.414	0.0281007	0.000833132	0
Clostridium_sp._Iso-A3	0.414	0.0325376	0.000833132	0.00231406
Kocuria_sp._1S2.E12	0.414	0.0392839	0.000833132	0
permafrost_bacterium_DT-IV23	0.4141	0.0425791	0.000833132	0
Sporobacter_termitidis	0.4142	0.0300727	0.000833132	0.00231406
Serratia_sp._RBE1CD-78	0.4142	0.0476388	0.000833132	0
Eubacterium_sp._cTPY-18	0.4143	0.0298651	0.000833132	0
Clostridium_ultunense	0.4143	0.0412558	0.000833132	0
Marichromatium_sp._275-26R	0.4144	0.0420861	0.000833132	0
Butyricimonas_synergistica	0.4146	0.0275817	0.000833132	0
nitrogen-fixing_bacterium_CC262C	0.4147	0.034821	0.000833132	0
Vibrio_sp._VS6	0.4147	0.0489621	0.000833132	0
Bacillus_sp._BNA5	0.415	0.0332382	0.000833132	0
Clostridium_sp._MU02-1	0.415	0.0447587	0.000833132	0
Clostridium_sp._BS-1	0.4152	0.0340426	0.000833132	0.00231406
Elbe_River_snow_isolate_Iso15_5	0.4153	0.0291126	0.000833132	0.00231406
Streptococcus_sp._C90	0.4153	0.0440062	0.000833132	0
Bisgaardia_hudsonenesis	0.4156	0.0480799	0.000833132	0
Coprococcus_sp._DJF_CR49	0.4157	0.00978204	0.0108307	0.0144629
Clostridium_fimetarium	0.4157	0.0293461	0.000833132	0.00231406
Paenibacillus_borealis	0.4157	0.0407109	0.000833132	0.00231406
Clostridiaceae_bacterium_NML_061030	0.4158	0.0292164	0.000833132	0.00231406
Anaerotruncus_colihominis	0.4159	0.0343799	0.000833132	0.00231406
Lactobacillus_paracasei	0.4159	0.0408407	0.000833132	0.00231406
swine_fecal_bacterium_FPC109	0.416	0.0430721	0.000833132	0.00231406
human_oral_bacterium_C66	0.4162	0.0425532	0.000833132	0.00231406
Prevotella_sp._E7_34	0.4163	0.0388428	0.000833132	0.00231406
Avibacterium_paragallinarum	0.4181	0.0480021	0.000833132	0
Prevotella_dentalis	0.4219	0.018137	0.00333253	0.00578516
Blautia_hydrogenotrophica	0.43	0.00586404	0.0266602	0.0214051
Eubacterium_oxidoreducens	0.4312	0.00516347	0.0308259	0.037025
Clostridium_sp._ID3	0.4323	0.0097042	0.0116638	0.0156199
Clostridium_sp._14505	0.4494	0.00713544	0.0174958	0.0138844
Clostridium_amygdalinum	0.4524	0.00672029	0.0174958	0.0138844
Bacteroides_sp._TP-5	0.453	0.00928905	0.0116638	0.00867774
Clostridiales_bacterium_80/4	0.453	0.0174883	0.00333253	0.00173555
Acidovorax_avenae	0.4552	0.0181629	0.00333253	0.00173555
bacterium_ROME1142sh	0.4566	0.00905553	0.0133301	0.0173555
Clostridium_sp._U523A5	0.4566	0.0199792	0.00333253	0.00173555
human_oral_bacterium_AC32	0.457	0.0172807	0.00333253	0.00173555
Clostridium_sp._CITR8	0.4573	0.00708355	0.0183289	0.0144629
Ethanoligenens_harbinense	0.4584	0.016658	0.00333253	0.00173555
rumen_bacterium_38H-42B	0.4633	0.0175921	0.00416566	0.00694219
unidentified_eubacterium_clone_BSV51	0.4831	0.0247794	0.00166626	0.0034711
Clostridium_sp._strain_S6	0.4833	0.0222366	0.00166626	0.0034711
Bacillus_subtilis	0.4848	0.023041	0.00166626	0.0034711
Clostridium_methylpentosum	0.485	0.0233783	0.00166626	0.0034711
bacterium_Te16R	0.4853	0.0231967	0.00166626	0.0034711
Megasphaera_micronuciformis	0.486	0.0133368	0.00499879	0.00752071
human_intestinal_firmicute_CO39	0.4862	0.0247016	0.00166626	0.0034711
Clostridium_sp._P8B_PV-2008	0.4869	0.0244162	0.00166626	0.0034711
Clostridium_sp._U101-b	0.4895	0.0244421	0.00166626	0.0034711
butyrate-producing_bacterium_T2-145	0.4901	0.0157499	0.00499879	0.00752071
Eubacterium_contortum	0.4985	0.0116502	0.00833132	0.00578516
Prevotella_sp._326-8	0.4996	0.0151271	0.00416566	0.00231406
Ruminococcus_sp._CJ60	0.5006	0.0154126	0.00416566	0.00231406
Clostridium_sp._Sc-THC	0.5037	0.0162948	0.00416566	0.00231406
Sutterella_sanguinus	0.5054	0.0170472	0.00416566	0.00231406
Clostridium_sp._MLG392	0.5097	0.00861443	0.0149964	0.0115703
Clostridium_sp._LP1	0.5379	0.0225221	0.0024994	0.00404961
Clostridiaceae_bacterium_SN021	0.54	0.0204982	0.0024994	0.00404961
rumen_bacterium_E14	0.5409	0.0206279	0.0024994	0.00404961
Clostridium_methoxybenzovorans	0.541	0.0218474	0.0024994	0.00404961
Bifidobacterium_minimum	0.5428	0.0143747	0.00499879	0.00289258
bacterium_RC36	0.5459	0.0225999	0.0024994	0.00404961
Alistipes_sp._RMA_9912	0.5475	0.00682408	0.0174958	0.0144629
butyrate-producing_bacterium_YE53	0.5487	0.00960042	0.0133301	0.0161985
Bacteroides_plebeius	0.5517	0.00565646	0.0283265	0.0329754
Bacteroides_sp._CJ44	0.5527	0.00871821	0.0108307	0.00809923
Clostridium_fusiformis	0.5641	0.0162688	0.00499879	0.0034711
Desulfotomaculum_sp._Iso-W2	0.5657	0.0149974	0.00499879	0.0034711
Bifidobacterium_merycicum	0.5658	0.0252206	0.00166626	0.000578516
Bifidobacterium_sp._CB38	0.5659	0.0212506	0.00166626	0.000578516
rumen_bacterium_2/9293-13	0.567	0.0149455	0.00499879	0.0034711
Mannheimia_glucosida	0.5671	0.0262844	0.00166626	0.000578516
Desulfovibrio_sp.	0.5673	0.0216139	0.00166626	0.000578516
Clostridium_sp._ID11	0.5679	0.0114427	0.00833132	0.0109918
Bifidobacterium_sp._Hma3	0.5684	0.0253503	0.00166626	0.000578516
Bacteroides_sp._ANH_2438	0.5686	0.0213025	0.00166626	0.000578516
Bifidobacterium_angulatum	0.5688	0.0142709	0.00499879	0.0034711
Citrobacter_youngae	0.5693	0.023508	0.00166626	0.000578516
Streptococcus_canis	0.5694	0.0254022	0.00166626	0.000578516
Enterococcus_sp._BW-	0.5695	0.0233264	0.00166626	0.000578516
Shigella_sp._121404	0.5696	0.0258692	0.00166626	0.000578516
bovine_rumen_bacterium_JPR19	0.5697	0.0149196	0.00499879	0.0034711
Streptococcus_sp._S16-11	0.5697	0.026466	0.00166626	0.000578516
Enterobacteriaceae_bacterium_159	0.5699	0.0256098	0.00166626	0.000578516
swine_fecal_bacterium_RF1A-Cel4	0.57	0.0271666	0.00166626	0.000578516
Bifidobacterium_cuniculi	0.5702	0.0253243	0.00166626	0.000578516
Clostridium_sp._MT_55_C	0.5708	0.0255579	0.00166626	0.000578516
Propionibacterium_acidifaciens	0.5711	0.022081	0.00166626	0.000578516
Bacteroides_sp._'Smarlab_BioMol-2301151'	0.5711	0.0249351	0.00166626	0.000578516
Actinobacillus_porcitonsillarum	0.5712	0.0262584	0.00166626	0.000578516
Veillonella_sp._ADV_3107.03	0.5713	0.0215361	0.00166626	0.000578516
Clostridium_ghonii	0.5713	0.0254541	0.00166626	0.000578516
Clostridium_sp._AL04-11	0.5717	0.025506	0.00166626	0.000578516
Porphyromonas_sp._UQD_449	0.572	0.0229113	0.00166626	0.000578516
Pasteurella_dagmatis	0.573	0.026985	0.00166626	0.000578516
Eubacterium_fissicatena	0.5731	0.0234043	0.00166626	0.000578516
Escherichia_sp._TX3	0.5731	0.0257395	0.00166626	0.000578516
Clostridium_sp._17	0.5731	0.0265698	0.00166626	0.000578516
Porphyromonas_sp._cp01.16	0.5739	0.0229372	0.00166626	0.000578516
Pantoea_endophytica	0.5741	0.0237935	0.00166626	0.000578516
Clostridium_sp._CS9	0.5796	0.0092631	0.0116638	0.00925626
Lactobacillus_rhamnosus	0.5864	0.015179	0.00583192	0.00404961
butyrate-producing_bacterium_R4	0.5884	0.0146341	0.00583192	0.00404961
Eubacterium_ventriosum	0.5934	0.0134406	0.00583192	0.00404961
Clostridium_sp._SC105	0.6125	0.0109497	0.0108307	0.0133059
Subdoligranulum_variabile	0.6151	0.0118578	0.00666506	0.00462813
bacterium_YE64	0.6156	0.00155682	0.142466	0.150414
Lachnospiraceae_bacterium_'Oral_Taxon_107'	0.619	0.00223145	0.125803	0.118596
Blautia_luti	0.6212	0.010301	0.0108307	0.0133059
Clostridiaceae_bacterium_DJF_VR07	0.6249	0.00921121	0.0116638	0.0138844
Lachnospiraceae_bacterium_DJF_CP64	0.6255	0.00877011	0.0116638	0.0138844
swine_manure_pit_bacterium_PPC108	0.6263	0.0105345	0.0116638	0.0138844
bacterium_mpn-isolate_group_23	0.6281	0.00952257	0.0116638	0.0138844
Bacteroides_sp._CJ47	0.6308	0.00467047	0.0358247	0.0318184
Clostridium_hathewayi	0.6311	0.00459263	0.0424897	0.0381821
Candidatus_Phytoplasma_cynodontis	0.6333	0.0143487	0.00499879	0.00694219
Bifidobacterium_catenulatum	0.6346	0.0150752	0.00499879	0.00694219
Ruminococcus_sp._K-1	0.6386	0.00474831	0.0399903	0.035868
Clostridium_propionicum	0.6417	0.0119357	0.00749819	0.00578516
Alistipes_sp._NML05A004	0.6438	0.00601972	0.0216614	0.0185125
Prevotella_sp._oral_taxon_782	0.645	0.0400623	0.000833132	0.00173555
bacterium_AN1045	0.6452	0.0409445	0.000833132	0.00173555
bacterium_YE62	0.6463	0.0428386	0.000833132	0.00173555
bacterium_B1C1-4	0.6466	0.0391282	0.000833132	0.00173555
bovine_rumen_bacterium_JPR17	0.6467	0.0428646	0.000833132	0.00173555
Propionibacterium_acnes	0.6468	0.0272704	0.000833132	0.00173555
Ruminococcus_sp._25F7	0.6471	0.0300208	0.000833132	0.00173555
mixed_culture_ruminal_bacterium_PAD196	0.6473	0.0291905	0.000833132	0.00173555
Burkholderia_andropogonis	0.6474	0.0415931	0.000833132	0.00173555
Bacillus_megaterium	0.6476	0.0282823	0.000833132	0.00173555
Clostridiales_bacterium_DJF_B034	0.6478	0.0408926	0.000833132	0.00173555
Erysipelothrix_rhusiopathiae	0.6481	0.0390763	0.000833132	0.00173555
Staphylococcus_pasteuri	0.6484	0.0285937	0.000833132	0.00173555
Ruminococcus_sp._ID8	0.6488	0.0344058	0.000833132	0.00173555
Clostridium_sp._B907-1	0.649	0.0340166	0.000833132	0.00173555
Clostridiales_bacterium_oral_taxon_093	0.6491	0.0325117	0.000833132	0.00173555
Butyrivibrio_crossotus	0.6495	0.0430202	0.000833132	0.00173555
Clostridium_sp._SL206	0.6496	0.0341463	0.000833132	0.00173555
bacterium_Te15A	0.65	0.0423975	0.000833132	0.00173555
Lactobacillus_reuteri	0.6503	0.0334977	0.000833132	0.00173555
Bifidobacterium_scardovii	0.6508	0.0394914	0.000833132	0.00173555
human_intestinal_firmicute_CJ36	0.6509	0.0322522	0.000833132	0.00173555
Eubacterium_tenue	0.6527	0.0202906	0.0024994	0.00115703
bacterium_gwi79	0.6533	0.0391541	0.000833132	0.00173555
Veillonella_sp._oral_taxon_158	0.6543	0.0187857	0.0024994	0.00115703
Oligella_urethralis	0.6556	0.0186559	0.0024994	0.00115703
Clostridium_sphenoides	0.6564	0.0134146	0.00583192	0.00752071
swine_fecal_bacterium_RF1A-Cel13	0.6584	0.0211988	0.0024994	0.00115703
Clostridium_sp._MLG080-1	0.6598	0.0118838	0.00833132	0.00636368
Lachnospiraceae_bacterium_DJF_CP76	0.6661	0.00604567	0.0233277	0.0266117
swine_fecal_bacterium_RF3E-Cel1	0.667	0.00723923	0.0183289	0.0156199
Alistipes_shahii	0.676	0.011287	0.00666506	0.00809923
Johnsonella_ignava	0.6804	0.0125065	0.00916445	0.00752071
Clostridium_symbiosum	0.6858	0.00832901	0.0174958	0.0202481
Dorea_longicatena	0.6888	0.0111053	0.00999758	0.00809923
Bacteroides_sp._CO55	0.6902	0.0194862	0.0024994	0.00173555
anaerobic_bacterium_U3/B-2	0.6906	0.0208614	0.0024994	0.00173555
Abiotrophia_defectiva	0.6932	0.0187078	0.0024994	0.00173555
Clostridium_sp._RT2	0.6939	0.0206539	0.0024994	0.00173555
Mannheimia_ruminalis	0.6945	0.0220031	0.0024994	0.00173555
Rikenella_microfusus	0.6952	0.0208874	0.0024994	0.00173555
Robinsoniella_peoriensis	0.6957	0.00651271	0.0224946	0.0196696
Clostridium_sp._AP81	0.696	0.0226777	0.0024994	0.00173555
Clostridium_sp._Kas107-2	0.6969	0.0178516	0.0024994	0.00173555
Ruminococcus_albus	0.697	0.004411	0.044156	0.0480168
Clostridium_sp._MK11	0.6974	0.020083	0.0024994	0.00173555
Clostridium_sp._EDB2	0.6978	0.00796575	0.019162	0.0214051
Clostridium_sp._47	0.6979	0.0218993	0.0024994	0.00173555
swine_manure_pit_bacterium_PPC104	0.6996	0.0207058	0.0024994	0.00173555
Prevotella_genomosp._C2	0.7038	0.025013	0.00166626	0.00289258
Prevotella_enoeca	0.7056	0.0213285	0.00166626	0.00289258
Clostridium_sp._MK8	0.7057	0.0255319	0.00166626	0.00289258
Peptococcus_sp._oral_taxon_167	0.7059	0.0231448	0.00166626	0.00289258
Firmicutes_bacterium_BL80	0.7065	0.0245459	0.00166626	0.00289258
bovine_rumen_bacterium_JPR14	0.7078	0.0246757	0.00166626	0.00289258
swine_manure_pit_bacterium_PPC39	0.7085	0.0240789	0.00166626	0.00289258
Acetivibrio_cellulolyticus	0.7103	0.0215101	0.00166626	0.00289258
swine_manure_pit_bacterium_PPC78	0.7229	0.00993773	0.00999758	0.0115703
Burkholderia_cepacia	0.7232	0.0158277	0.00333253	0.00231406
Collinsella_sp._HA6	0.7233	0.0180851	0.00333253	0.00231406
Bacteroides_sp._0103_800	0.7237	0.0168915	0.00333253	0.00231406
Syntrophococcus_sucromutans	0.7239	0.0173067	0.00333253	0.00231406
Ruminococcus_sp._M23	0.7241	0.0174105	0.00333253	0.00231406
endosymbiont_'TC1'_of_Trimyema_compressum	0.7252	0.016191	0.00333253	0.00231406
Eubacterium_dolichum	0.7452	0.019616	0.0024994	0.0034711
Clostridium_sp._B556-1	0.7489	0.0157239	0.00416566	0.00289258
butyrate-producing_bacterium_A2-231	0.7513	0.0100156	0.012497	0.0144629
bacterium_YE257	0.7523	0.0154904	0.00416566	0.00289258
bacterium_YE273	0.7546	0.015698	0.00416566	0.00289258
Ruminococcus_sp._M73	0.7689	0.0177478	0.00333253	0.00462813
rumen_bacterium_8/94-29A	0.7695	0.0194603	0.00333253	0.00462813
bovine_rumen_bacterium_JPR21	0.7709	0.0182927	0.00333253	0.00462813
Clostridium_sp._CYP2	0.7712	0.01767	0.00333253	0.00404961
Clostridiaceae_bacterium_LEMV61	0.772	0.0188895	0.00333253	0.00404961
rumen_bacterium_8/9293-24	0.7742	0.0188376	0.00333253	0.00404961
Bacteroides_salanitronis	0.7748	0.0172289	0.00333253	0.00404961
Lactonifactor_longoviformis	0.7772	0.0171251	0.00333253	0.00404961
Clostridium_sp._F15	0.7782	0.0088739	0.0166626	0.0185125
Bacteroides_galacturonicus	0.7819	0.00819927	0.0166626	0.0185125
butyrate-producing_bacterium_SL7/1	0.7868	0.00679813	0.0199952	0.0185125
Ruminococcus_sp._15975	0.7899	0.0147639	0.00416566	0.00520665
Bacillus_cereus	0.79	0.0146082	0.00416566	0.00520665
Bacteroides_sp._CJ78	0.7907	0.00101194	0.202451	0.207687
Eubacterium_uniforme	0.7936	0.0135963	0.00583192	0.00462813
Granulicatella_adiacens	0.7951	0.0147898	0.00583192	0.00462813
swine_fecal_bacterium_SD-Pec2	0.8068	0.0162429	0.00499879	0.00578516
Ruminococcus_sp._CO41	0.8071	0.0143228	0.00499879	0.00636368
human_intestinal_firmicute_CO31	0.8096	0.00721328	0.0233277	0.0254547
rumen_bacterium_8/9293-23	0.8107	0.016165	0.00499879	0.00578516
rumen_bacterium_38H-21A	0.8114	0.0140893	0.00666506	0.00578516
Clostridium_polysaccharolyticum	0.8152	0.0129216	0.00666506	0.00578516
rumen_bacterium_8/9293-9	0.816	0.0140633	0.00666506	0.00578516
Clostridiaceae_bacterium_SH021	0.818	0.0132849	0.00583192	0.00694219
Eubacterium_rectale	0.8222	0.000363259	0.748986	0.741079
Lachnospiraceae_bacterium_DJF_RR61	0.8265	0.0137001	0.00666506	0.00752071
bacterium_ic1277	0.8314	0.0108199	0.00833132	0.00752071
butyrate-producing_bacterium_L2-21	0.8332	0.00339907	0.0874789	0.0844634
Clostridium_sp._ID6	0.8362	0.0127141	0.00749819	0.00867774
Bacteroides_coprophilus	0.8378	0.0118059	0.00749819	0.00867774
Prevotella_sp._oral_taxon_302	0.839	0.00988583	0.00916445	0.00809923
Hespellia_stercorisuis	0.8428	0.0110016	0.00833132	0.00925626
Clostridium_sp._ASF356	0.8464	0.0126622	0.00833132	0.00925626
butyrate-producing_bacterium_A1-86	0.8574	0.00544888	0.0266602	0.0248762
Epulopiscium_sp.	0.8615	0.00884795	0.0108307	0.0121488
Clostridium_xylanovorans	0.8732	0.00830306	0.0141632	0.0133059
Pseudobutyrivibrio_xylanivorans	0.8757	0.00910742	0.0133301	0.0144629
bacterium_ic1294	0.881	0.00853659	0.0149964	0.0161985
Ruminococcus_torques	0.8946	0.00687597	0.0208283	0.0196696
Clostridium_spiroforme	0.896	0.00690192	0.0199952	0.0208266
Pseudobutyrivibrio_ruminis	0.9002	0.00524131	0.0399903	0.0416532
Lachnospira_multipara	0.9037	0.00285418	0.101642	0.0995048
Clostridium_sp._TM-40	0.9284	0.0053451	0.031659	0.0329754
Pasteuria_penetrans	0.9352	0.00653866	0.0216614	0.0214051
Bacteroides_sp._B2	0.9685	0.00158277	0.157462	0.157356
Lachnospira_pectinoschiza	0.9792	0.00394395	0.0674837	0.0665294
Bacteroides_sp.	0.9872	0.000415153	0.572362	0.572153
Clostridiales_bacterium_DJF_VP48	0.9874	0.00547483	0.0416566	0.0410747
unidentified_eubacterium_clone_BSV70	0.9886	0.00570835	0.0341584	0.0335539
Blautia_hansenii	1	0.00695381	0.0199952	0.0202481
Clostridium_acidurici	1	0.00729113	0.0183289	0.0185125
Ruminococcus_sp._CO7	1	0.00757654	0.0183289	0.0185125
Clostridium_lavalense	1	0.00778412	0.0166626	0.016777
cf._Oscillospira_sp._BA04013493	1	0.00851064	0.0133301	0.0133059
rumen_bacterium_R-23	1	0.0101453	0.00833132	0.00867774
Clostridium_saccharolyticum	1	0.0106383	0.0108307	0.0104133
butyrate-producing_bacterium_SS3/4	1	0.0107161	0.00999758	0.0104133
butyrate-producing_bacterium_A2-175	1	0.0122211	0.00749819	0.00809923
Bifidobacterium_choerinum	1	0.0127919	0.00666506	0.00636368
Ruminococcus_sp._MLG080-3	1	0.0128179	0.00583192	0.00578516
Bacteroides_sp._Smarlab_3302996	1	0.0129995	0.00583192	0.00578516
rumen_bacterium_38H-54B	1	0.0134665	0.00666506	0.00694219
Clostridiaceae_bacterium_K10	1	0.0135703	0.00666506	0.00694219
Lachnospiraceae_bacterium_14-2	1	0.0139855	0.00583192	0.00578516
rumen_bacterium_28L-30	1	0.0142449	0.00499879	0.00462813
Lactobacillus_casei	1	0.0148936	0.00499879	0.00462813
rumen_bacterium_8/9293-30	1	0.0149715	0.00499879	0.00462813
Roseburia_cecicola	1	0.0155163	0.00583192	0.00520665
Bacteroides_sp._314-4	1	0.0160093	0.00416566	0.0034711
Bacteroides_sp._CS27	1	0.0170213	0.00416566	0.0034711
rumen_bacterium_E2	1	0.0170732	0.00416566	0.00404961
Paraprevotella_clara	1	0.0172548	0.00333253	0.00289258
Clostridium_sp._CJ61	1	0.0173586	0.00333253	0.00289258
Clostridium_sp._MK31	1	0.0177218	0.00333253	0.0034711
Clostridium_sp._OkiF101	1	0.0184743	0.00333253	0.00289258
Ruminococcus_sp._M22	1	0.0185003	0.00333253	0.0034711
Bacteroides_sp._CB2	1	0.0185781	0.0024994	0.00231406
Clostridium_sp._HAAP-2	1	0.0188635	0.00333253	0.00289258
Clostridium_sp._Iso-W3	1	0.0189154	0.00333253	0.0034711
Aerococcus_viridans	1	0.0196419	0.0024994	0.00231406
swine_fecal_bacterium_RF3G-Cel1	1	0.0198495	0.0024994	0.00231406
Firmicutes_bacterium_SE2005	1	0.0199273	0.00333253	0.0034711
Clostridium_sp._RT8	1	0.020109	0.0024994	0.00231406
Neisseria_meningitidis	1	0.0209393	0.0024994	0.00231406
butyrate-producing_bacterium_SM6/1	1	0.0209652	0.0024994	0.00289258
butyrate-producing_bacterium_L2-12	1	0.0209912	0.0024994	0.00231406
Bacteroides_sp._356-4	1	0.0212766	0.00166626	0.00115703
Flavobacterium_johnsoniae	1	0.0213804	0.00166626	0.00115703
Clostridiaceae_bacterium_END-2	1	0.0214063	0.00166626	0.00231406
Peptoniphilus_sp._oral_taxon_836	1	0.0214582	0.00166626	0.00115703
poultry_manure_bacterium_MUC2	1	0.0217955	0.00166626	0.00115703
Eubacterium_plexicaudatum	1	0.0219253	0.0024994	0.00231406
Bacteroidales_str._KB10	1	0.0221069	0.00166626	0.00231406
Leuconostoc_citreum	1	0.0222107	0.00166626	0.00115703
Lachnospiraceae_bacterium_DJF_CR52	1	0.0222885	0.00166626	0.00115703
Veillonellaceae_bacterium_oral_taxon_155	1	0.0223404	0.00166626	0.00115703
Clostridium_sp._TO-931	1	0.0227037	0.0024994	0.00231406
bacterium_TMB39	1	0.0230669	0.00166626	0.00231406
Clostridium_paradoxum	1	0.0230929	0.00166626	0.00115703
Eubacterium_sp._'Smarlab_BioMol-2301166'	1	0.0231188	0.00166626	0.00173555
Clostridium_hiranonis	1	0.0233524	0.00166626	0.00115703
Bacteroidaceae_bacterium_SV439	1	0.024001	0.00166626	0.00231406
Granulicatella_elegans	1	0.024027	0.00166626	0.00115703
Clostridium_sp._AL02-12	1	0.0241827	0.00166626	0.00115703
Sphingobacterium_multivorum	1	0.0243383	0.00166626	0.00231406
Clostridium_sp._NML_04A032	1	0.0243902	0.00166626	0.00231406
Butyrivibrio_sp._3	1	0.024494	0.00166626	0.00115703
bacterium_Bf1	1	0.0246497	0.00166626	0.00173555
human_oral_bacterium_C73	1	0.0247276	0.00166626	0.00231406
rumen_bacterium_R-15	1	0.0247535	0.00166626	0.00231406
Blautia_coccoides	1	0.0249092	0.00166626	0.00231406
Bacteroides_sp._CS24	1	0.0249611	0.00166626	0.00173555
Candidatus_Prevotella_conceptionensis	1	0.024987	0.00166626	0.00115703
Clostridium_felsineum	1	0.0250908	0.00166626	0.00231406
Eubacterium_sp._'Smarlab_BioMol-2301231'	1	0.0251427	0.00166626	0.00115703
Enterococcus_faecium	1	0.0252465	0.00166626	0.00231406
Streptococcus_infantis	1	0.0252724	0.00166626	0.00173555
Actinobacillus_suis	1	0.0259211	0.00166626	0.00115703
swine_manure_pit_bacterium_PPC95	1	0.0261287	0.00166626	0.00115703
Moryella_indoligenes	1	0.0261806	0.00166626	0.00173555
Lactobacillus_brevis	1	0.0263103	0.00166626	0.00115703
bacterium_PS7	1	0.0263363	0.00166626	0.00115703
Filifactor_alocis	1	0.0263622	0.00166626	0.00173555
Peptococcus_sp._RR-2005	1	0.0264141	0.00166626	0.00115703
rumen_bacterium_1/9293-12	1	0.0264401	0.00166626	0.00173555
Clostridium_alkalicellulosi	1	0.0265179	0.00166626	0.00231406
Clostridium_sp._C9	1	0.0265957	0.00166626	0.00231406
Peptostreptococcus_stomatis	1	0.0266476	0.00166626	0.00231406
Mannheimia_granulomatis	1	0.0269071	0.00166626	0.00115703
Mannheimia_sp._MCCM_00145	1	0.026959	0.00166626	0.00115703
bovine_rumen_bacterium_JPR18	1	0.0271147	0.00166626	0.00173555
Bifidobacterium_sp._Bin2	1	0.0274001	0.000833132	0.000578516
Bacteroides_sp._ECP-C1	1	0.0274779	0.000833132	0.000578516
Dysgonomonas_capnocytophagoides	1	0.0276077	0.000833132	0.000578516
Porphyromonas_sp._UQD_350	1	0.0276336	0.000833132	0.000578516
Porphyromonas_sp._UQD_406	1	0.0276596	0.000833132	0.00115703
Prevotella_corporis	1	0.0277893	0.000833132	0.00115703
Prevotella_sp._cp02.13A	1	0.0278672	0.000833132	0.00115703
Flavobacterium_psychrophilum	1	0.0279709	0.000833132	0.000578516
Sphingobacterium_sp._35	1	0.0280228	0.000833132	0.000578516
Bacillus_pumilus	1	0.0283083	0.000833132	0.000578516
Paenibacillus_amylolyticus	1	0.028438	0.000833132	0.000578516
Paenibacillus_macerans	1	0.0284899	0.000833132	0.000578516
Granulicatella_para-adiacens	1	0.0286715	0.000833132	0.000578516
Enterococcus_casseliflavus	1	0.0287234	0.000833132	0.00115703
Lactobacillus_buchneri	1	0.0288012	0.000833132	0.000578516
Streptococcus_porcinus	1	0.028931	0.000833132	0.000578516
Clostridiaceae_bacterium_rennanqilyf6	1	0.0292683	0.000833132	0.000578516
Clostridium_estertheticum	1	0.0293202	0.000833132	0.000578516
Clostridium_litorale	1	0.0293721	0.000833132	0.00115703
Clostridium_sp._BG-C9	1	0.0295018	0.000833132	0.000578516
Clostridium_sp._FRJ	1	0.0295797	0.000833132	0.000578516
Dethiosulfatibacter_aminovorans	1	0.0297353	0.000833132	0.000578516
Oscillospira_sp._C	1	0.0299689	0.000833132	0.00115703
Ruminococcus_sp._25F6	1	0.0299948	0.000833132	0.000578516
Ruminococcus_sp._Pei041	1	0.0300467	0.000833132	0.00115703
Syntrophomonas_wolfei	1	0.0300986	0.000833132	0.000578516
Anaeroglobus_geminatus	1	0.0301245	0.000833132	0.000578516
Sporomusa_ovata	1	0.0301764	0.000833132	0.000578516
Veillonella_caviae	1	0.0302024	0.000833132	0.000578516
Veillonella_sp._S101	1	0.0302802	0.000833132	0.000578516
Burkholderia_lata	1	0.0305916	0.000833132	0.00115703
Chromobacterium_violaceum	1	0.0307732	0.000833132	0.000578516
Anaeromyxobacter_dehalogenans	1	0.030877	0.000833132	0.000578516
bacterium_Q20	1	0.0319927	0.000833132	0.00115703
iron-reducing_bacterium_P4	1	0.0322782	0.000833132	0.00115703
swine_manure_pit_bacterium_PPC91	1	0.0324079	0.000833132	0.000578516
Ruminobacillus_xylanolyticum	1	0.0324598	0.000833132	0.00115703
Bacillus_halodurans	1	0.0324857	0.000833132	0.00115703
Desulfonispora_thiosulfatigenes	1	0.0326155	0.000833132	0.000578516
Propionispora_vibrioides	1	0.0326414	0.000833132	0.00115703
Sporomusa_sp._DR15	1	0.0326674	0.000833132	0.000578516
Limnobacter_sp._DG1290	1	0.0326933	0.000833132	0.000578516
bacterium_YE60	1	0.0327452	0.000833132	0.00115703
butyrate-producing_bacterium_PH05YA06	1	0.0327711	0.000833132	0.00115703
Bifidobacterium_sp._Bin7	1	0.0329268	0.000833132	0.000578516
Bifidobacterium_sp._CS30	1	0.0329528	0.000833132	0.00115703
Bifidobacterium_sp._Trm9	1	0.0330047	0.000833132	0.000578516
Gordonibacter_pamelaeae	1	0.0330566	0.000833132	0.000578516
Porphyromonas_sp._UQD_409	1	0.0331085	0.000833132	0.000578516
Gemella_sanguinis	1	0.0331604	0.000833132	0.000578516
Lactobacillus_sp._34-10B	1	0.0335236	0.000833132	0.000578516
Streptococcus_macacae	1	0.0337052	0.000833132	0.000578516
Streptococcus_urinalis	1	0.0338609	0.000833132	0.000578516
Clostridium_sp._DF2C21	1	0.0340685	0.000833132	0.000578516
Clostridium_sp._MLG480	1	0.0341204	0.000833132	0.000578516
Lachnospiraceae_bacterium_28-4	1	0.034302	0.000833132	0.000578516
Peptostreptococcus_sp._cp10.23	1	0.0343539	0.000833132	0.00115703
Anaerospora_hongkongensis	1	0.0344577	0.000833132	0.00115703
Veillonella_criceti	1	0.0345355	0.000833132	0.000578516
Firmicutes_bacterium_EG18	1	0.0346134	0.000833132	0.00115703
Enterobacter_sp._EB223	1	0.0354437	0.000833132	0.000578516
Erwinia_sp._BC477	1	0.0359626	0.000833132	0.000578516
Serratia_sp._p4h-4-u8f	1	0.0370265	0.000833132	0.000578516
Shigella_sp._BBDP80	1	0.0371562	0.000833132	0.000578516
Actinobacillus_arthritidis	1	0.0373897	0.000833132	0.000578516
endosymbiont_of_Bathymodiolus_azoricus	1	0.0375714	0.000833132	0.000578516
bacterium_D8	1	0.0378827	0.000833132	0.000578516
rumen_bacterium_R-20	1	0.0383238	0.000833132	0.00115703
Porphyromonas_macacae	1	0.0386611	0.000833132	0.000578516
Porphyromonas_sp._UQD_340	1	0.0386871	0.000833132	0.00115703
Sphingobacterium_sp._CI46	1	0.0388687	0.000833132	0.000578516
Sphingobacterium_sp._DDT-6	1	0.0388947	0.000833132	0.000578516
bacterium_XB45	1	0.0389206	0.000833132	0.000578516
Clostridium_sp._cfp1	1	0.0389725	0.000833132	0.00115703
Eubacterium_sp._oral_strain_A03MT	1	0.0390503	0.000833132	0.000578516
Aeromonas_veronii	1	0.0391022	0.000833132	0.00115703
Porphyromonas_sp._361-7	1	0.0397769	0.000833132	0.000578516
Porphyromonas_sp._UQD_348	1	0.0398287	0.000833132	0.000578516
Porphyromonas_sp._UQD_349	1	0.0398547	0.000833132	0.00115703
Prevotellaceae_bacterium_DJF_RP84	1	0.0399325	0.000833132	0.000578516
Gemella_palaticanis	1	0.0404774	0.000833132	0.000578516
Bacillus_flexus	1	0.0405034	0.000833132	0.000578516
Epulopiscium_sp._N.l._1_clone_72	1	0.0409185	0.000833132	0.000578516
Clostridium_septicum	1	0.0410742	0.000833132	0.000578516
Clostridium_sp._TM106	1	0.0412299	0.000833132	0.000578516
Eubacteriaceae_bacterium_NML_070849	1	0.0413077	0.000833132	0.000578516
Lachnospiraceae_genomosp._C1	1	0.0413856	0.000833132	0.00115703
Peptococcaceae_bacterium_AHT17	1	0.0414115	0.000833132	0.000578516
Oscillospira_sp._F	1	0.0414375	0.000833132	0.000578516
Selenomonas_sputigena	1	0.0414634	0.000833132	0.00115703
Burkholderia_fungorum	1	0.0416191	0.000833132	0.00115703
rumen_bacterium_R-21	1	0.042631	0.000833132	0.000578516
swine_manure_pit_bacterium_PPC1	1	0.042657	0.000833132	0.000578516
Streptococcus_mutans	1	0.0427608	0.000833132	0.00115703
Streptococcus_pseudoporcinus	1	0.0427867	0.000833132	0.000578516
Streptococcus_sp._11aTha1	1	0.0428127	0.000833132	0.000578516
sapropel_bacterium_J151	1	0.0428905	0.000833132	0.00115703
Streptococcus_lutetiensis	1	0.0429165	0.000833132	0.00115703
Streptococcus_sobrinus	1	0.0429424	0.000833132	0.000578516
Dehalobacter_sp._1	1	0.0430462	0.000833132	0.00115703
Actinomyces_cardiffensis	1	0.043124	0.000833132	0.000578516
Actinomyces_graevenitzii	1	0.04315	0.000833132	0.000578516
Actinomyces_neuii	1	0.0431759	0.000833132	0.000578516
Rothia_mucilaginosa	1	0.0433057	0.000833132	0.00115703
Bifidobacterium_sp._JEMLUCVII-1	1	0.0434094	0.000833132	0.000578516
Bifidobacterium_sp._LUCL-W4	1	0.0434354	0.000833132	0.000578516
Porphyromonas_sp._UQD_344	1	0.0435132	0.000833132	0.000578516
Bacillus_anthracis	1	0.0435392	0.000833132	0.00115703
Dolosigranulum_pigrum	1	0.0436949	0.000833132	0.000578516
Enterococcus_durans	1	0.0437468	0.000833132	0.000578516
Streptococcus_sinensis	1	0.0439543	0.000833132	0.000578516
Clostridium_crotonatovorans	1	0.0442657	0.000833132	0.00115703
Clostridium_paraputrificum	1	0.0443954	0.000833132	0.000578516
Clostridium_sp._CYP3	1	0.0446809	0.000833132	0.000578516
Clostridium_sp._Iso-W6	1	0.0447327	0.000833132	0.000578516
Clostridium_sp._MU02-17	1	0.0447846	0.000833132	0.00115703
Ruminococcus_sp._M10	1	0.0449144	0.000833132	0.00115703
Veillonella_denticariosi	1	0.0449403	0.000833132	0.000578516
Hydrogenophilus_denitrificans	1	0.0452257	0.000833132	0.00115703
Bisgaard_Taxon_3	1	0.0477686	0.000833132	0.00115703
Pasteurella_aerogenes	1	0.0478464	0.000833132	0.000578516
bovine_rumen_bacterium_JPR15	1	0.049507	0.000833132	0.00115703
rumen_bacterium_R2-11	1	0.0497405	0.000833132	0.00115703
Acetanaerobacterium_elongatum	NA	10	0	0.00462813
Acetobacterium_bakii	NA	10	0	0.000578516
Acetobacterium_malicum	NA	10	0	0.000578516
Achromobacter_denitrificans	NA	10	0	0.000578516
Achromobacter_sp._BP3	NA	10	0	0.000578516
Achromobacter_sp._c152	NA	10	0	0.000578516
Achromobacter_sp._Da-12	NA	10	0	0.000578516
Achromobacter_sp._GW1	NA	10	0	0.000578516
Achromobacter_sp._M061017-2	NA	10	0	0.000578516
Achromobacter_sp._NH55I	NA	10	0	0.000578516
Achromobacter_sp._P7	NA	10	0	0.000578516
Achromobacter_sp._PD_25	NA	10	0	0.000578516
Achromobacter_sp._S301	NA	10	0	0.000578516
Acidaminococcus_sp._DJF_RP55	NA	10	0	0.00173555
Acidithiobacillus_ferrooxidans	NA	10	0	0.0034711
Acidithiobacillus_sp._SM-1	NA	10	0	0.000578516
Acidovorax_citrulli	NA	10	0	0.000578516
Acidovorax_sp._DW126	NA	10	0	0.000578516
Acidovorax_temperans	NA	10	0	0.000578516
Actinobacillus_genomosp._1	NA	10	0	0.000578516
actinobacterium_S-N(0)-21A	NA	10	0	0.000578516
actinobacterium_WJ25	NA	10	0	0.000578516
Actinomadura_sp._40008	NA	10	0	0.000578516
Actinomyces_howellii	NA	10	0	0.000578516
Actinomyces_odontolyticus	NA	10	0	0.00115703
Aerococcus_sp._qy17	NA	10	0	0.000578516
Aeromonas_hydrophila	NA	10	0	0.000578516
Aeromonas_salmonicida	NA	10	0	0.000578516
Aeromonas_sp._BFF-2	NA	10	0	0.000578516
Afipia_genosp._9	NA	10	0	0.000578516
Agromyces_sp._BJS1	NA	10	0	0.000578516
Alcaligenaceae_bacterium_BZ45	NA	10	0	0.000578516
Alcaligenes_sp.	NA	10	0	0.00404961
Alcaligenes_sp._92	NA	10	0	0.000578516
Alcaligenes_sp._O-1	NA	10	0	0.000578516
Alcaligenes_sp._PAOAC171	NA	10	0	0.000578516
Alcaligenes_sp._PhR5	NA	10	0	0.000578516
Alcaligenes_sp._R-3	NA	10	0	0.000578516
Alcaligenes_sp._TS-MOSK-4	NA	10	0	0.000578516
Alcaligenes_sp._WMB22	NA	10	0	0.000578516
Alcanivorax_sp._ZXM144	NA	10	0	0.000578516
Alicyclobacillus_acidocaldarius	NA	10	0	0.000578516
Alkalibacterium_indicireducens	NA	10	0	0.000578516
Alkalibacterium_sp._D7	NA	10	0	0.000578516
alpha_proteobacterium_ANRB6-1	NA	10	0	0.000578516
alpha_proteobacterium_BAL199	NA	10	0	0.000578516
alpha_proteobacterium_pACH79	NA	10	0	0.000578516
alpha_proteobacterium_SK50-2	NA	10	0	0.000578516
Alteromonadales_bacterium_HD-O-03-15	NA	10	0	0.000578516
Alteromonas_marina	NA	10	0	0.000578516
Alteromonas_sp._Ant52	NA	10	0	0.000578516
Alteromonas_sp._Fun-127	NA	10	0	0.000578516
Alteromonas_sp._H91	NA	10	0	0.000578516
Alvinella_pompejana_epibiont	NA	10	0	0.000578516
Amycolatopsis_sp._C29	NA	10	0	0.000578516
Anaerobacter_polyendosporus	NA	10	0	0.000578516
anaerobic_bacterium_A116	NA	10	0	0.00115703
anaerobic_bacterium_A127	NA	10	0	0.000578516
anaerobic_bacterium_ANA_No.33	NA	10	0	0.000578516
anaerobic_bacterium_ANA_No.37	NA	10	0	0.000578516
anaerobic_bacterium_B109	NA	10	0	0.000578516
anaerobic_bacterium_B119	NA	10	0	0.000578516
anaerobic_bacterium_B123	NA	10	0	0.000578516
anaerobic_bacterium_B141	NA	10	0	0.000578516
anaerobic_bacterium_B156	NA	10	0	0.000578516
anaerobic_bacterium_F4/B-1	NA	10	0	0.000578516
anaerobic_bacterium_Glu3	NA	10	0	0.000578516
anaerobic_bacterium_S1	NA	10	0	0.000578516
anaerobic_bacterium_S21	NA	10	0	0.000578516
anaerobic_bacterium_S22	NA	10	0	0.000578516
anaerobic_bacterium_U3/P-1	NA	10	0	0.000578516
anaerobic_bacterium_U3/P-2	NA	10	0	0.00289258
[truncated: 1,023 more rows]

## Sheet: Genus summary
O.T.U.	pvalue_pairs	qvalues	Case Mean	Control Mean
Bacteroides	0	0.00102145	37.3501	22.4192
UNCLASSIFIED	0	0.05	20.9999	12.1986
Escherichia	0	0.0156282	1.02475	0.0214051
Bifidobacterium	0	0.000459653	0.914779	0.134216
Streptococcus	0	0.00388151	0.719826	0.190332
Haemophilus	0	0.0162411	0.503212	0.0838849
bacterium_ic1292	0	0.0196629	0.348249	0.0214051
Clostridiaceae_bacterium_LEMV63	0	0.00694586	0.462388	0.157935
Lachnospiraceae_bacterium_DJF_VR44	0	0.00883555	0.501545	0.204216
Shigella	0	0.0159857	0.289097	0.00694219
Bacteroidaceae_bacterium_Smarlab_3301643	0	0.000970378	0.284098	0.0202481
Eubacterium	0	0.0081716	2.94096	2.68836
Alistipes	0	0.00163432	0.651509	0.399755
Veillonella	0	0.0110827	0.256605	0.0381821
Lachnospiraceae_bacterium_A2	0	0.0358529	0.312424	0.105868
butyrate-producing_bacterium_SSC/2	0	0.00607763	0.213282	0.0138844
Eubacterium_tortuosum	0	0.0116445	0.344084	0.155042
Enterobacter	0	0.015526	0.16496	0.00752071
Oligella	0	0.0132789	0.353248	0.196117
Cronobacter	0	0.0153728	0.146631	0.00752071
Salmonella	0	0.0158836	0.134134	0.00173555
bacterium_mpn-isolate_group_5	0	0.0205822	0.144965	0.0150414
Clostridiaceae_bacterium_bSSV31	0	0.0072523	0.190787	0.0624798
bacterium_YE64	0	0.0193565	0.427397	0.303721
Bacteroidaceae_bacterium_DJF_B220	0	0.000868233	0.112473	0.00694219
swine_manure_pit_bacterium_PPC108	0	0.024668	0.16496	0.0595872
rumen_bacterium_R-7	0	0.0236466	0.161628	0.0694219
bacterium_ic1258	0	0.0195097	0.184122	0.0931411
bacterium_ic1214	0	0.0194586	0.0891451	0.00752071
Terrahaemophilus	0	0.0163943	0.124137	0.0457028
Solobacterium	0	0.0118999	0.129969	0.0520665
Clostridiales_bacterium_L2-14	0	0.00439224	0.137467	0.0636368
Pantoea	0	0.0157814	0.0733156	0.00636368
Citrobacter	0	0.0153218	0.0649843	0.00115703
Aggregatibacter	0	0.0327886	0.0641512	0.000578516
butyrate-producing_bacterium_T2-132	0	0.00617978	0.120804	0.0578516
Lachnospiraceae_bacterium_DJF_VP18k1	0	0.0087334	0.0899783	0.0283473
Dehalobacterium	0	0.0026047	0.0991427	0.0376036
Actinobacillus	0	0.01619	0.0699831	0.00925626
butyrate-producing_bacterium_SR1/1	0	0.00592441	0.0941439	0.0352895
human_intestinal_firmicute_CO35	0	0.0221144	0.0724825	0.0144629
bacterium_mpn-isolate_group_27	0	0.0282942	0.0766481	0.0196696
segmented_filamentous_bacterium	0	0.0124617	0.119971	0.0636368
Clostridiales_bacterium_DJF_RP51	0	0.0260981	0.108307	0.053802
Clostridium_innocuum	0	0.0114402	0.147464	0.0931411
mastodon_intestinal_bacterium_AN-22-6	0	0.00628192	0.0891451	0.037025
Klebsiella	0	0.0156793	0.0516542	0.000578516
Clostridium_ramosum	0.0001	0.0114913	0.134967	0.0867774
bacterium_'New_Zealand_B'	0	0.0178754	0.0958102	0.0480168
Coprobacillus	0	0.0117978	0.0624849	0.0161985
Lactobacillales_bacterium_DJF_B280	0	0.00321757	0.0766481	0.0306614
Serratia	0	0.0159346	0.0508211	0.00694219
Desulfotomaculum	0	0.00990807	0.0849795	0.0422317
Firmicutes_bacterium_EG14	0.0009	0.0121042	0.131635	0.0902485
bovine_rumen_bacterium_JPR13	0	0.0207865	0.0524873	0.0115703
Clostridiales_bacterium_AHT16	0	0.0040858	0.0508211	0.0161985
Clostridium_spiroforme	0.0001	0.0115424	0.0741487	0.0399176
bacterium_mpn-isolate_group_19	0	0.0202247	0.0574861	0.0248762
bacterium_ic1311	0.0001	0.0282431	0.063318	0.0312399
Pusillimonas	0	0.0133299	0.0341584	0.00520665
Pectobacterium	0	0.0158325	0.0291596	0.00289258
Elbe_River_snow_isolate_9_3	0	0.00265577	0.0399903	0.0138844
Vibrio	0	0.0167007	0.0341584	0.00809923
Pasteurella	0	0.0163432	0.0274934	0.00231406
Collinsella	0.0011	0.0292646	0.0499879	0.0260332
swine_fecal_bacterium_FPC70	0	0.0240552	0.0366578	0.0127274
bacterium_G100VIII	0	0.0184372	0.0324921	0.00867774
Mannheimia	0	0.0162921	0.0308259	0.00809923
butyrate-producing_bacterium_SL6/1/1	0	0.00572012	0.0299928	0.00752071
Erwinia	0	0.0155771	0.0199952	0.00115703
Peptostreptococcus	0.0007	0.0100102	0.0233277	0.00752071
Edwardsiella	0	0.015475	0.0158295	0.000578516
bacterium_MB7-1	0.0001	0.0185904	0.0166626	0.00289258
bacterium_ic1391	0.0003	0.0199183	0.0174958	0.00404961
Yersinia	0	0.0160368	0.0133301	0.000578516
Brenneria	0	0.0152196	0.0116638	0.000578516
Hafnia	0.0001	0.0371808	0.00916445	0
bacterium_C15	0.0001	0.0333504	0.00916445	0
bacterium_Ba2	0.0003	0.0386619	0.00749819	0
Clostridiaceae_bacterium_DJF_VR76	0.0008	0.00674157	0.000833132	0.0109918
bacterium_B4C2-5	0.0011	0.0181307	0.00166626	0.0127274
Prevotellaceae_bacterium_DJF_VR15	0.0003	0.0297242	0.000833132	0.0127274
swine_fecal_bacterium_SD-Pec1	0.0001	0.0497957	0.00166626	0.0161985
butyrate-producing_bacterium_SR1/5	0.0009	0.0263534	0.00499879	0.0196696
bacterium_YE62	0.0008	0.0193054	0.00583192	0.0219836
bacterium_ASF500	0.0008	0.0122574	0.00749819	0.0242977
Porphyromonadaceae_bacterium_JN18_A107_G	0	0.0011236	0.000833132	0.0185125
Anaerofilum	0.0002	0.0101634	0.00583192	0.0248762
Firmicutes_str._C29	0.0001	0.0175689	0.00666506	0.0260332
swine_fecal_bacterium_FPC67	0.0002	0.023953	0.00916445	0.0300828
human_intestinal_firmicute_CO2	0.0001	0.0286006	0.00749819	0.0289258
Gram-negative_bacterium_cL10-2b-4	0	0.0176711	0.000833132	0.0231406
Erysipelothrix	0.0002	0.0118488	0.0116638	0.034711
Clostridiaceae_bacterium_DJF_LS40	0	0.0354954	0.00583192	0.0300828
Clostridiales_bacterium_80/3	0.0008	0.00398366	0.0224946	0.0474383
human_intestinal_firmicute_CO13	0	0.0220123	0.00666506	0.0323969
Dysgonomonas	0	0.00132789	0.00749819	0.0335539
butyrate-producing_bacterium_M104/1	0	0.00551583	0.0108307	0.0387606
unidentified_bacterium_ZF3	0.0003	0.0249745	0.024994	0.0532235
butyrate-producing_bacterium_L1-810	0.0002	0.0052094	0.0241608	0.053802
Shuttleworthia	0.0002	0.00960163	0.0258271	0.0555376
bacterium_mpn-isolate_group_22	0	0.0203269	0.00333253	0.0341325
butyrate-producing_bacterium_L2-50	0	0.042288	0.0133301	0.0451243
Clostridiaceae_bacterium_SH032	0	0.0265066	0.00999758	0.0428102
Clostridiales_bacterium_DJF_B152	0.0006	0.00413687	0.0508211	0.0861989
Anaerotruncus	0	0.0102145	0.019162	0.0566946
bacterium_mpn-isolate_group_24	0	0.020429	0.0374909	0.0798352
Lachnobacterium	0	0.00919305	0.0233277	0.0659508
Clostridia_bacterium_TSW07CA7	0	0.0113381	0.00333253	0.0462813
Bacillus	0	0.00286006	0.0408235	0.0867774
Oscillibacter	0	0.00975485	0.0224946	0.0700005
Eubacteriaceae_bacterium_DJF_CR57k1	0	0.00796731	0.0199952	0.0694219
Lactococcus	0	0.00383044	0.0241608	0.0746286
rumen_bacterium_8/94-32	0	0.0232891	0.0241608	0.0752071
butyrate-producing_bacterium_Ph07AY02	0	0.0283963	0.0108307	0.0734716
Porphyromonas	0	0.00143003	0.0891451	0.152728
human_intestinal_firmicute_CO19	0	0.0220633	0.0683168	0.133637
Lactobacillus	0	0.00362615	0.0474885	0.113389
butyrate-producing_bacterium_SM4/1	0	0.00582227	0.0674837	0.137687
human_intestinal_firmicute_CS26	0	0.0222676	0.00499879	0.0798352
bacterium_ic1296	0	0.0197651	0.0116638	0.0867774
Clostridiaceae_bacterium_SK061	0	0.00715015	0.00499879	0.0821493
Lachnospiraceae_bacterium_DJF_RP14	0	0.00858018	0.12247	0.202481
Oscillospiraceae_bacterium_NML_061048	0	0.00970378	0.0358247	0.118596
Acetonema	0	0.0107252	0.0858126	0.189175
Odoribacter	0	0.0255363	0.0383241	0.143472
Verrucomicrobia_bacterium_MS-F-88	0	0.0174157	0.00166626	0.118017
Mogibacterium	0	0.0266599	0.00416566	0.121488
butyrate-producing_bacterium_ART55/1	0	0.00510725	0.0549867	0.175869
butyrate-producing_bacterium_PH07AY3	0	0.0211951	0.0358247	0.164299
butyrate-producing_bacterium_P607	0	0.0209908	0.0208283	0.157356
butyrate-producing_bacterium_PH05YB02	0	0.021093	0.0308259	0.169505
Oscillospira	0	0.0104188	0.0683168	0.213472
butyrate-producing_bacterium_L1-952	0	0.00531154	0.012497	0.168927
butyrate-producing_bacterium_PH07BY04	0	0.0213994	0.12497	0.284051
Phascolarctobacterium	0	0.0109295	0.139133	0.299093
swine_fecal_bacterium_RF3E-Xyl1	0	0.0243616	0.0874789	0.252233
bacterium_str._31285	0	0.0206844	0.0424897	0.220415
Burkholderiales_bacterium_Smarlab_3302047	0	0.0130746	0.00999758	0.192067
butyrate-producing_bacterium_M50/1	0	0.00561798	0.0283265	0.229671
human_intestinal_firmicute_CO4	0	0.0222165	0.0258271	0.273638
Sutterella	0	0.013381	0.608186	0.867196
Dialister	0	0.0108274	0.0933108	0.398019
butyrate-producing_bacterium_M21/2	0	0.00556691	0.209949	0.529342
Clostridiales_bacterium_A2-162	0	0.00403473	0.0974764	0.456449
Clostridiaceae_bacterium_DJF_VR09	0	0.0066905	0.348249	0.720831
Fusobacterium	0	0.0125128	0.240775	0.623062
butyrate-producing_bacterium_SS2/1	0	0.00597549	0.141632	0.541491
bacterium_08.96.4	0	0.00469867	0.129135	0.53397
human_intestinal_firmicute_CB47	0	0.0217569	0.189121	0.645046
Akkermansia	0	0.0173647	0.00333253	0.466284
Anaerostipes	0	0.00893769	0.317423	0.800088
bacterium_ic1379	0	0.0198672	0.34325	0.866039
Roseburia	0	0.00955056	1.20221	2.06704
butyrate-producing_bacterium_PH07AY5	0	0.0212462	0.531538	1.41447
Prevotellaceae_bacterium_DJF_RP17	0	0.0296221	0.000833132	1.0743
Subdoligranulum	0	0.010572	0.998925	2.11968
Parabacteroides	0	0.00137896	0.206617	2.10059
rumen_bacterium_R-9	0	0.0236977	0.00333253	2.90936
Faecalibacterium	0	0.0102656	2.92096	6.29888
Prevotella	0	0.00153218	0.434062	8.83336
Ruminococcus	0.0104	0.0104699	4.20482	4.01375
Clostridium	0.0033	0.00745659	3.72243	3.93565
Bacteroidaceae_bacterium_SV452	0.1863	0.000919305	0.821468	0.867774
Blautia	0.1834	0.00393258	0.582359	0.544384
Lachnospira	0.5684	0.00924413	0.471553	0.487111
Coprococcus	0.4089	0.00909091	0.4124	0.433309
Butyrivibrio	0.0013	0.00898876	0.302427	0.373721
butyrate-producing_bacterium_M62/1	0.014	0.00566905	0.244941	0.293886
Lachnospiraceae_bacterium_'Oral_Taxon_107'	0.6755	0.00832482	0.174958	0.16777
human_intestinal_bacterium_julong_601	0.0185	0.0217058	0.141632	0.109918
Lachnospiraceae_bacterium_DJF_VP17k1	0.1187	0.00868233	0.133301	0.112232
butyrate-producing_bacterium_L2-21	0.9983	0.00541369	0.121637	0.12091
Hespellia	0.0238	0.00914198	0.100809	0.130745
Bacteroidetes_bacterium_Eg28	0.0443	0.00219612	0.0833132	0.0624798
bacterium_mpn-isolate_group_25	0.7099	0.0204801	0.0774813	0.0821493
butyrate-producing_bacterium_PH07BW10	0.3357	0.0213483	0.0708162	0.0815708
Eggerthella	0.014	0.000561798	0.0708162	0.0480168
Pseudobutyrivibrio	0.2595	0.00944842	0.06915	0.0815708
butyrate-producing_bacterium_L1-81	0.1617	0.00515832	0.0674837	0.0827278
Lachnospiraceae_bacterium_DJF_RR13	0.0144	0.0308989	0.0658174	0.0439672
Robinsoniella	0.3064	0.00949949	0.0599855	0.0503309
Clostridium_cocleatum	0.0121	0.0113892	0.0599855	0.0387606
butyrate-producing_bacterium_L2-7	0.1597	0.00546476	0.0583192	0.0457028
Candidatus_Phytoplasma	0.0022	0.0172625	0.0583192	0.0335539
butyrate-producing_bacterium_SL7/1	0.9622	0.0057712	0.0558198	0.0555376
Clostridiales_bacterium_DJF_VP48	0.4394	0.00429009	0.0541536	0.0619012
Lachnospiraceae_bacterium_DJF_CP76	0.0244	0.00847804	0.0508211	0.072893
unidentified_eubacterium_clone_BSV70	0.245	0.0420838	0.0491548	0.0601657
Oribacterium	0.0483	0.00934627	0.0483217	0.0671079
bacterium_ic1291	0.8557	0.0196118	0.0408235	0.0387606
butyrate-producing_bacterium_A1-86	0.9436	0.00485189	0.0399903	0.0387606
bacterium_mpn-isolate_group_20	0.0897	0.0202758	0.0391572	0.053802
butyrate-producing_bacterium_T1-815	0.1394	0.0061287	0.0383241	0.0509094
Parasporobacterium	0.0186	0.00939734	0.0383241	0.0225621
Clostridiaceae_bacterium_DJF_LS13	0.0022	0.00658836	0.0374909	0.0647938
Clostridiaceae_bacterium_DJF_B063	0.2977	0.00653728	0.0374909	0.0462813
Hydrogenoanaerobacterium	0.2054	0.0103677	0.0358247	0.0462813
Eubacterium_cylindroides	0.002	0.0115935	0.0349915	0.0619012
human_intestinal_firmicute_CO31	0.9444	0.0286517	0.0341584	0.0329754
Clostridiales_bacterium_DJF_VP35	0.0513	0.00423902	0.0333253	0.0208266
Desulfovibrio	0.012	0.0141471	0.0333253	0.017934
Bilophila	0.0232	0.014096	0.0324921	0.0185125
Anaplasma	0.1352	0.0129213	0.031659	0.0433887
bacterium_mpn-isolate_group_18	0.0264	0.0201736	0.0299928	0.0474383
Firmicutes_bacterium_DJF_VP44	0.2212	0.0120531	0.0299928	0.0219836
Clostridiaceae_bacterium_DJF_VR07	0.2651	0.00663943	0.0291596	0.0376036
butyrate-producing_bacterium_YE53	0.9135	0.00623085	0.0291596	0.0277688
rumen_bacterium_RC7r-54	0.0041	0.0237487	0.0283265	0.0127274
Lachnospiraceae_bacterium_DJF_RR61	0.067	0.00863126	0.0274934	0.016777
human_intestinal_firmicute_CJ6	0.1556	0.0219101	0.0266602	0.037025
bacterium_ic1393	0.0057	0.0199694	0.0258271	0.0468598
Dorea	0.8414	0.0269152	0.0258271	0.0277688
rumen_bacterium_2/9293-25	0.9899	0.0227783	0.0258271	0.0266117
Pasteuria	0.1713	0.00306435	0.024994	0.034711
Eubacteriaceae_bacterium_DJF_B077	0.384	0.00791624	0.024994	0.0312399
bacterium_ic1294	0.8432	0.019714	0.024994	0.0231406
butyrate-producing_bacterium_A2-231	0.0089	0.00505618	0.0241608	0.0433887
unidentified_bacterium_MK1-309	0.0305	0.0249234	0.0241608	0.0127274
swine_fecal_bacterium_RF3E-Cel1	0.8277	0.0243105	0.0233277	0.0214051
bacterium_ROME1142sh	0.8277	0.0186925	0.0233277	0.0214051
human_intestinal_firmicute_CO10	0.066	0.0285495	0.0216614	0.0341325
butyrate-producing_bacterium_A2-166	0.4162	0.00490296	0.0216614	0.0271903
bacterium_mpn-isolate_group_16	0.5952	0.0201226	0.0216614	0.0254547
bacterium_YE61	0.981	0.0192543	0.0216614	0.0208266
swine_fecal_bacterium_FPC111	0.0093	0.0239019	0.0216614	0.00925626
Alcaligenes	0.2	0.0131767	0.0208283	0.0144629
rumen_bacterium_R-23	0.0734	0.0235444	0.0208283	0.0121488
Ethanoligenens	0.0741	0.00750766	0.0208283	0.0121488
Clostridiales_bacterium_DJF_CP67	0.0171	0.00418795	0.0208283	0.00983478
Enterococcus	0.011	0.00357508	0.0208283	0.00925626
Epulopiscium	0.0261	0.00459653	0.0199952	0.034711
Eubacteriaceae_bacterium_WN037	0.1535	0.00806946	0.0199952	0.0289258
butyrate-producing_bacterium_PH05YB03	0.2411	0.021144	0.0199952	0.0138844
bacterium_ic1272	0.0393	0.028192	0.0199952	0.0104133
Burkholderia	0.382	0.0134831	0.019162	0.0242977
butyrate-producing_bacterium_SS3/4	0.8906	0.00602656	0.019162	0.017934
Paenibacillus	0.0218	0.00301328	0.0183289	0.0329754
bacterium_ic1297	0.1588	0.0481614	0.0183289	0.0115703
butyrate-producing_bacterium_SM6/1	0.0037	0.00587334	0.0183289	0.00636368
butyrate-producing_bacterium_PH05YA09	0.0032	0.0210419	0.0174958	0.00578516
butyrate-producing_bacterium_Ph07AW01	0.0015	0.0214505	0.0174958	0.00520665
butyrate-producing_bacterium_A2-232	0.0241	0.0263023	0.0166626	0.0306614
Lachnospiraceae_bacterium_DJF_CP64	0.4918	0.00842697	0.0166626	0.0208266
butyrate-producing_bacterium_Ph07AY04	0.0044	0.0215015	0.0166626	0.00578516
butyrate-producing_bacterium_L1-93	0.028	0.00526047	0.0158295	0.0289258
bacterium_mpn-isolate_group_23	0.187	0.0203779	0.0158295	0.0231406
butyrate-producing_bacterium_R4	0.0809	0.0284474	0.0158295	0.00867774
Firmicutes_bacterium_SE2005	0.0467	0.0275281	0.0158295	0.00752071
Lactobacillales_bacterium_HY-36-1	0.0043	0.00326864	0.0158295	0.00520665
anaerobic_bacterium_EtOH8	0.4802	0.00980592	0.0149964	0.019091
human_intestinal_bacterium_PUE	0.8839	0.0216547	0.0149964	0.0161985
Clostridiaceae_bacterium_SH021	0.5165	0.00709908	0.0149964	0.0121488
Gemella	0.1038	0.00275792	0.0149964	0.00809923
Clostridiaceae_bacterium_SN021	0.5566	0.00720123	0.0141632	0.0173555
swine_fecal_bacterium_FPC47	0.3946	0.0411134	0.0141632	0.0104133
Shewanella	0.1426	0.014811	0.0141632	0.00809923
rumen_bacterium_1/9293-2	0.0348	0.0225741	0.0141632	0.00636368
Actinobacillus_rossii	0.0014	0.0454545	0.0141632	0.0034711
butyrate-producing_bacterium_A2-175	0.7553	0.00495403	0.0133301	0.0150414
Johnsonella	0.7359	0.0269663	0.0133301	0.0115703
rumen_bacterium_8/9293-5	0.2721	0.0231869	0.0133301	0.00867774
Moryella	0.0444	0.0092952	0.0133301	0.00578516
Firmicutes_bacterium_M38	0.1914	0.027477	0.012497	0.019091
Clostridiales_bacterium_HAW-EB17	1	0.00434116	0.012497	0.0121488
human_intestinal_firmicute_CB17	0.167	0.0284985	0.012497	0.00694219
Acidovorax	0.0066	0.0136364	0.012497	0.0034711
proteobacterium_symbiont_of_Nilaparvata_lugens	0.0067	0.0170582	0.012497	0.0034711
butyrate-producing_bacterium_T2-145	1	0.0306946	0.0116638	0.0121488
rumen_bacterium_38H-46	0.4525	0.0229826	0.0116638	0.00867774
Staphylococcus	0.0164	0.0031665	0.0108307	0.0231406
butyrate-producing_bacterium_A2-207	0.2111	0.00500511	0.0108307	0.016777
human_intestinal_firmicute_CJ31	0.415	0.021808	0.0108307	0.0150414
bacterium_ic1277	0.8608	0.0195608	0.0108307	0.0115703
human_intestinal_firmicute_CO39	1	0.0221655	0.0108307	0.0109918
Clostridiaceae_bacterium_WN011	0.5561	0.0355465	0.0108307	0.00809923
Bordetella	0.5582	0.0132278	0.0108307	0.00809923
swine_manure_pit_bacterium_PPC78	0.067	0.028907	0.00999758	0.0185125
Lachnospiraceae_bacterium_DJF_VP08k1	0.0884	0.0268641	0.00999758	0.017934
Sphingobacterium	0.8566	0.00214505	0.00999758	0.0109918
Firmicutes_bacterium_VNs39	0.0156	0.0122063	0.00999758	0.00289258
butyrate-producing_bacterium_PH07BW09	0.0062	0.0212972	0.00916445	0.0231406
Caldaterra	0.0172	0.0259959	0.00916445	0.0208266
Lachnospiraceae_bacterium_DJF_VP30	0.1081	0.00878447	0.00916445	0.016777
swine_manure_pit_bacterium_PPC90	0.3088	0.0248212	0.00916445	0.0138844
Acetanaerobacterium	0.5875	0.0100613	0.00916445	0.0115703
Clostridiaceae_bacterium_K10	0.5888	0.00689479	0.00916445	0.0115703
rumen_bacterium_38H-21A	1	0.0342186	0.00916445	0.00983478
rumen_bacterium_38H-54B	1	0.0230337	0.00916445	0.00867774
rumen_bacterium_37H-28A	0.8392	0.0229316	0.00916445	0.00809923
rumen_bacterium_3/9293-14A	0.2565	0.0228805	0.00916445	0.00520665
Megasphaera	0.072	0.0108784	0.00833132	0.0161985
Granulicatella	0.7001	0.00347293	0.00833132	0.00983478
Lachnospiraceae_bacterium_14-2	1	0.0267109	0.00833132	0.00867774
Peptococcus	1	0.00995914	0.00833132	0.00809923
Streptomyces	0.4946	0.00040858	0.00833132	0.00578516
Pseudomonas	0.4964	0.0164964	0.00833132	0.00578516
unidentified_eubacterium_clone_BSV61	0.2314	0.0250766	0.00833132	0.00462813
bacterium_mpn-isolate_group_10	0.2335	0.0200715	0.00833132	0.00462813
Syntrophococcus	0.1443	0.00965271	0.00833132	0.00404961
bacterium_Ba1	0.0034	0.0181818	0.00833132	0.00115703
Fastidiosipila	0.0059	0.0103166	0.00749819	0.0208266
rumen_bacterium_8/9293-21	0.2695	0.0287028	0.00749819	0.0121488
rumen_bacterium_8/9293-23	0.4443	0.0343207	0.00749819	0.0109918
swine_fecal_bacterium_SD-Pec2	0.4424	0.0244637	0.00749819	0.0104133
rumen_bacterium_8/9293-9	1	0.0287538	0.00749819	0.00752071
bovine_rumen_bacterium_JPR19	1	0.0209397	0.00749819	0.00752071
Actinomyces	1	5.10725e-05	0.00749819	0.00694219
unidentified_eubacterium_clone_BSV51	0.8244	0.0250255	0.00749819	0.00636368
rumen_bacterium_E2	0.4798	0.0233912	0.00749819	0.00520665
bacterium_YE257	0.3322	0.0191011	0.00749819	0.00462813
bacterium_YE266	0.1872	0.0191522	0.00749819	0.0034711
rumen_bacterium_8/9293-30	0.6727	0.0231359	0.00666506	0.00867774
Leuconostoc	0.6771	0.00372829	0.00666506	0.00867774
bovine_rumen_bacterium_JPR21	0.8294	0.0337079	0.00666506	0.00752071
mixed_culture_ruminal_bacterium_PAD156	0.4332	0.0423391	0.00666506	0.00404961
rumen_bacterium_2/9293-13	0.2783	0.0226762	0.00666506	0.0034711
bacterium_YE273	0.2809	0.0192033	0.00666506	0.0034711
Bacteroidaceae_bacterium_SV444	0.0594	0.0295199	0.00666506	0.00173555
poultry_manure_bacterium_MUC2	0.0602	0.022523	0.00666506	0.00173555
Acinetobacter	0.0181	0.0376915	0.00666506	0.00115703
Catonella	0.0611	0.00903984	0.00583192	0.0133059
Butyricicoccus	0.3983	0.0266088	0.00583192	0.00925626
Chryseobacterium	0.4004	0.00173647	0.00583192	0.00867774
bacterium_RC36	1	0.0306435	0.00583192	0.00520665
Clostridiaceae_bacterium_LEMV61	0.7964	0.0264556	0.00583192	0.00462813
Bisgaard_Taxon_5	0.2171	0.0327375	0.00583192	0.00231406
swine_fecal_bacterium_RF2C-Xyl8	0.0021	0.041522	0.00583192	0
bacterium_Iso11_2	0.002	0.00474974	0.00499879	0.017934
Clostridiaceae_bacterium_SK082	0.2753	0.0265577	0.00499879	0.00867774
rumen_bacterium_38H-42B	0.3701	0.0342697	0.00499879	0.00809923
human_intestinal_firmicute_CJ36	0.6351	0.021859	0.00499879	0.00694219
rumen_bacterium_28L-30	0.8078	0.0228294	0.00499879	0.00636368
Riemerella	1	0.0257406	0.00499879	0.00462813
Sporobacter	1	0.0105209	0.00499879	0.00462813
bacterium_TMB39	0.5638	0.00480082	0.00499879	0.0034711
Clostridiales_bacterium_80/4	0.5406	0.0353422	0.00499879	0.00289258
Coriobacterium	0.5444	0.0293156	0.00499879	0.00289258
swine_fecal_bacterium_RF3G-Cel2	0.0697	0.0345761	0.00499879	0.00115703
Kluyvera	0.0232	0.0157303	0.00499879	0.000578516
Acidaminococcus	0.0016	0.0271706	0.00416566	0.0173555
bacterium_ic1340	0.005	0.0198161	0.00416566	0.0150414
Barnesiella	0.0879	0.00122574	0.00416566	0.0104133
Clostridiaceae_bacterium_37-7-2Cl	0.0858	0.00643514	0.00416566	0.00983478
Bacteroidaceae_bacterium_S533	0.1744	0.0254341	0.00416566	0.00867774
Flavobacterium	0.1778	0.00183861	0.00416566	0.00867774
bacterium_Te16R	0.2477	0.018999	0.00416566	0.00809923
Lactonifactor	0.3404	0.00755873	0.00416566	0.00752071
rumen_bacterium_E14	0.4595	0.0233401	0.00416566	0.00636368
bovine_rumen_bacterium_JPR14	0.4603	0.0208376	0.00416566	0.00636368
Geobacillus	0.7897	0.00291113	0.00416566	0.00520665
endosymbiont_'TC1'_of_Trimyema_compressum	0.7919	0.0123085	0.00416566	0.00520665
bacterium_YE55	0.7945	0.0280388	0.00416566	0.00520665
Arthrobacter	1	0.00020429	0.00416566	0.00462813
Aeromonas	1	0.0144535	0.00416566	0.0034711
Propionibacterium	0.7495	0.000357508	0.00416566	0.00289258
Capnocytophaga	0.4973	0.00168539	0.00416566	0.00231406
swine_fecal_bacterium_FPC73	0.501	0.0241062	0.00416566	0.00231406
Pseudoalteromonas	0.5013	0.0277835	0.00416566	0.00231406
human_oral_bacterium_AC32	0.5015	0.0223698	0.00416566	0.00231406
swine_fecal_bacterium_RF3G-Cel1	0.5018	0.0244127	0.00416566	0.00231406
mixed_culture_ruminal_bacterium_PAD160	0.5048	0.0264045	0.00416566	0.00231406
bacterium_PE03-6G18	0.2824	0.0334525	0.00416566	0.00173555
Firmicutes_bacterium_PV6-4	0.2831	0.0433606	0.00416566	0.00173555
beta_proteobacterium_A-A7-3	0.2845	0.0321757	0.00416566	0.00173555
Lachnospiraceae_bacterium_28-4	0.2874	0.00837589	0.00416566	0.00173555
Candidatus_Nardonella	0.2899	0.0328907	0.00416566	0.00173555
Denitrobacterium	0.0454	0.000510725	0.00416566	0.000578516
Avibacterium	0.0459	0.0459653	0.00416566	0.000578516
swine_fecal_bacterium_RF1A-Cel6	0.0111	0.0413177	0.00416566	0
Anaerobiospirillum	0.0111	0.0145046	0.00416566	0
bacterium_L4M2_4-3	0.1493	0.0185393	0.00333253	0.00809923
Acetivibrio	0.216	0.0101124	0.00333253	0.00752071
Brevibacillus	0.2174	0.00296221	0.00333253	0.00752071
rumen_bacterium_8/9293-24	0.214	0.0343718	0.00333253	0.00694219
Methylobacillus	0.2141	0.0320225	0.00333253	0.00694219
rumen_bacterium_8/94-29A	0.2165	0.0344229	0.00333253	0.00694219
Paraprevotella	0.3015	0.0014811	0.00333253	0.00636368
anaerobic_bacterium_U3/P-2	0.4254	0.0178243	0.00333253	0.00578516
Bacteroides_cellulosolvens	0.7689	0.0423902	0.00333253	0.00462813
human_oral_bacterium_C73	0.772	0.0224208	0.00333253	0.00462813
butyrate-producing_bacterium_L2-12	0.7746	0.00536261	0.00333253	0.00462813
mixed_culture_ruminal_bacterium_PAD196	0.7749	0.00638407	0.00333253	0.00404961
Aerococcus	0.7766	0.00337079	0.00333253	0.00404961
Neisseria	0.7774	0.0276813	0.00333253	0.00404961
swine_manure_pit_bacterium_PPC104	1	0.024617	0.00333253	0.00289258
Zunongwangia	0.7216	0.00199183	0.00333253	0.00231406
Gramella	0.1632	0.00188968	0.00333253	0.000578516
Alloscardovia	0.1652	0.0348315	0.00333253	0.000578516
beta_proteobacterium_K-2032b	0.027	0.0441777	0.00333253	0
Gallibacterium	0.0271	0.0461185	0.00333253	0
swine_fecal_bacterium_RF1A-Cel5	0.0275	0.0412666	0.00333253	0
bovine_rumen_bacterium_JPR1	0.0278	0.0400409	0.00333253	0
Rahnella	0.0279	0.0374362	0.00333253	0
bacterium_ES18	0.0281	0.0183861	0.00333253	0
gamma_proteobacterium_SR4	0.0281	0.0168539	0.00333253	0
Pasteurella_mairii	0.0281	0.0161389	0.00333253	0
Trabulsiella	0.0285	0.0374872	0.00333253	0
swine_fecal_bacterium_RF2B-Pec13	0.0285	0.0241573	0.00333253	0
bacterium_Bm29	0.0288	0.0388151	0.00333253	0
coliform_bacterium_S3/117	0.0292	0.0402451	0.00333253	0
Enterobacteriales_bacterium_LBRN-NC18	0.0292	0.0364147	0.00333253	0
Pasteurellaceae_bacterium_R46	0.0296	0.0376404	0.00333253	0
Clostridiaceae_bacterium_END-2	0.0058	0.00679265	0.0024994	0.0121488
Clostridiaceae_bacterium_NML_060002	0.006	0.00699694	0.0024994	0.0121488
Clostridiaceae_bacterium_80Wc	0.0508	0.00648621	0.0024994	0.00867774
rumen_bacterium_8/9293-6	0.051	0.023238	0.0024994	0.00867774
bacterium_AN1045	0.2639	0.0305414	0.0024994	0.00578516
Pedobacter	0.3784	0.0257916	0.0024994	0.00520665
anaerobic_bacterium_U3/B-2	0.3821	0.0177732	0.0024994	0.00520665
Firmicutes_bacterium_BL80	0.3823	0.012002	0.0024994	0.00520665
Lachnospiraceae_genomosp._C1	0.7449	0.00888662	0.0024994	0.0034711
Eubacterium_dolichum	0.7451	0.0273749	0.0024994	0.0034711
Sporomusa	1	0.0110317	0.0024994	0.00289258
Nostoc	1	0.00245148	0.0024994	0.00289258
bovine_rumen_bacterium_JPR18	1	0.0483657	0.0024994	0.00231406
swine_fecal_bacterium_RF2B-Pec5	1	0.0414198	0.0024994	0.00231406
bacterium_Te15A	1	0.0335546	0.0024994	0.00231406
Micrococcus	1	0.025332	0.0024994	0.00231406
swine_manure_pit_bacterium_PPC12A	1	0.0247191	0.0024994	0.00231406
bovine_rumen_bacterium_JPR17	1	0.0208887	0.0024994	0.00231406
Azoarcus	1	0.0139428	0.0024994	0.00231406
Limnobacter	1	0.0135342	0.0024994	0.00231406
Rikenellaceae_bacterium_JAM-BA0501	1	0.00158325	0.0024994	0.00231406
rumen_bacterium_1/9293-12	0.6916	0.0424413	0.0024994	0.00173555
low_G+C_Gram-positive_bacterium_HTA506	0.6917	0.0123596	0.0024994	0.00173555
Abiotrophia	0.6926	0.00331971	0.0024994	0.00173555
swine_fecal_bacterium_RF1A-Cel13	0.6927	0.0412155	0.0024994	0.00173555
Rikenella	0.6927	0.0255873	0.0024994	0.00173555
bacterium_gwi79	0.6965	0.0194076	0.0024994	0.00173555
Acetobacter	0.652	0.0128703	0.0024994	0.00115703
Cytophaga	0.6549	0.0020429	0.0024994	0.00115703
Cellulomonas	0.657	0.000102145	0.0024994	0.00115703
Petrobacter	0.3102	0.0277324	0.0024994	0.000578516
beta_proteobacterium_OcN1	0.3104	0.0322778	0.0024994	0.000578516
Providencia	0.3108	0.0373851	0.0024994	0.000578516
bacterium_ic1332	0.3117	0.0336568	0.0024994	0.000578516
bacterium_B4-10	0.3122	0.0386108	0.0024994	0.000578516
Micromonospora	0.3122	0.000306435	0.0024994	0.000578516
swine_manure_bacterium_37-1	0.3138	0.0417263	0.0024994	0.000578516
Leeuwenhoekiella	0.314	0.00194076	0.0024994	0.000578516
Morganella	0.0669	0.0453524	0.0024994	0
bacterium_SAL_18	0.0671	0.0188458	0.0024994	0
fruit_powder_bacterium_509/05	0.0677	0.0368233	0.0024994	0
Raoultella	0.068	0.0326353	0.0024994	0
bacterium_Bm26	0.0681	0.038764	0.0024994	0
Paucibacter	0.0683	0.0313585	0.0024994	0
cf._Escherichia_coli_symbiont_4_of_Acromyrmex_octospinosus	0.0683	0.0150153	0.0024994	0
Candidatus_Blochmannia	0.0685	0.0452503	0.0024994	0
Plesiomonas	0.0685	0.0325843	0.0024994	0
Oxalicibacterium	0.0686	0.0319714	0.0024994	0
swine_fecal_bacterium_RF3D-Cel1	0.0687	0.041573	0.0024994	0
Victivallis	0.0688	0.0125638	0.0024994	0
Bisgaardia	0.0689	0.0460674	0.0024994	0
Bisgaard_Taxon_45	0.0689	0.0457099	0.0024994	0
bacterium_ZhS050715	0.0689	0.0397344	0.0024994	0
bacterium_38	0.0691	0.0385087	0.0024994	0
Escherichia	0.0693	0.0367722	0.0024994	0
coliform_bacterium_S2/34	0.0697	0.0401941	0.0024994	0
Sodalis	0.0698	0.0326864	0.0024994	0
poultry_manure_bacterium_MUC7	0.07	0.0341164	0.0024994	0
Leclercia	0.0707	0.0372319	0.0024994	0
Clostridiaceae_bacterium_FH052	0.0047	0.00684372	0.00166626	0.0104133
rod-shaped_symbiont_of_Mixotricha_paradoxa	0.0054	0.0171093	0.00166626	0.0104133
Brevibacterium	0.0086	0.0252298	0.00166626	0.00983478
Herbaspirillum	0.0221	0.0318693	0.00166626	0.00809923
Sporobacterium	0.0346	0.0309499	0.00166626	0.00752071
Corynebacterium	0.1381	0.0252809	0.00166626	0.00520665
Ralstonia	0.2126	0.0316139	0.00166626	0.00462813
Acidithiobacillus	0.2139	0.0144025	0.00166626	0.00462813
Clostridiales_bacterium_Yos55	0.2154	0.00444331	0.00166626	0.00462813
Weissella	0.2163	0.00377937	0.00166626	0.00462813
swine_fecal_bacterium_SD-Xyl6	0.3228	0.0245148	0.00166626	0.00404961
Arctic_bacterium_NP25	0.3229	0.0174668	0.00166626	0.00404961
Rothia	0.3268	0.0425945	0.00166626	0.00404961
bacterium_YE65	0.4812	0.0396834	0.00166626	0.0034711
rumen_bacterium_R-15	0.4823	0.0234423	0.00166626	0.0034711
Bacteroidales_str._KB10	0.4835	0.000766088	0.00166626	0.0034711
Comamonas	0.484	0.031665	0.00166626	0.0034711
Thiomonas	0.4845	0.0276302	0.00166626	0.0034711
swine_manure_pit_bacterium_PPC39	0.4869	0.028856	0.00166626	0.0034711
swine_fecal_bacterium_FPC109	0.7045	0.0424923	0.00166626	0.00289258
Clostridiales_bacterium_DJF_B034	0.7072	0.0304392	0.00166626	0.00289258
Peptoniphilus	0.7128	0.00786517	0.00166626	0.00289258
swine_manure_pit_bacterium_PPC95	1	0.0419816	0.00166626	0.00231406
rumen_bacterium_R-26	1	0.0408069	0.00166626	0.00231406
Massilia	1	0.0319203	0.00166626	0.00231406
Filifactor	1	0.0271195	0.00166626	0.00231406
Bacteroidaceae_bacterium_SV439	1	0.0254852	0.00166626	0.00231406
bacterium_Bf1	1	0.018284	0.00166626	0.00231406
Lachnospiraceae_bacterium_DJF_CR52	1	0.00852911	0.00166626	0.00231406
Desulfotomaculum_guttoideum	1	0.00827375	0.00166626	0.00231406
Carnobacterium	1	0.00342186	0.00166626	0.00231406
Bisgaard_Taxon_3	1	0.0456078	0.00166626	0.00173555
Lactobacillaceae_bacterium_DJF_003	1	0.0428498	0.00166626	0.00173555
bacterium_str._82345	1	0.0399387	0.00166626	0.00173555
Diaphorobacter	1	0.031716	0.00166626	0.00173555
Papillibacter	1	0.0310521	0.00166626	0.00173555
bacterium_B1C1-4	1	0.0279877	0.00166626	0.00173555
bacterium_PS7	1	0.0262513	0.00166626	0.00173555
Prolixibacter	1	0.0259448	0.00166626	0.00173555
rumen_bacterium_R-20	1	0.0234934	0.00166626	0.00173555
human_intestinal_firmicute_CJ7	1	0.0219612	0.00166626	0.00173555
Propionispora	1	0.0109806	0.00166626	0.00173555
Dehalobacter	1	0.009857	0.00166626	0.00173555
Butyricimonas	1	0.00127681	0.00166626	0.00173555
cyanobiont_of_Histioneis_sp.	1	0.0421859	0.00166626	0.00115703
rumen_bacterium_R2-11	1	0.040858	0.00166626	0.00115703
rumen_bacterium_R-21	1	0.034474	0.00166626	0.00115703
Variovorax	1	0.0317671	0.00166626	0.00115703
anaerobic_bacterium_Glu3	1	0.0304903	0.00166626	0.00115703
bacterium_YE60	1	0.028141	0.00166626	0.00115703
Leptospira	1	0.0278856	0.00166626	0.00115703
Photobacterium	1	0.0278345	0.00166626	0.00115703
Myroides	1	0.0256895	0.00166626	0.00115703
swine_manure_pit_bacterium_PPC88	1	0.0247702	0.00166626	0.00115703
swine_manure_pit_bacterium_PPC1	1	0.0245659	0.00166626	0.00115703
Idiomarina	1	0.01476	0.00166626	0.00115703
Nitrosomonas	1	0.0138407	0.00166626	0.00115703
Veillonellaceae_bacterium_oral_taxon_155	1	0.0106742	0.00166626	0.00115703
Dethiosulfatibacter	1	0.00771195	0.00166626	0.00115703
Howardella	1	0.0046476	0.00166626	0.00115703
Alkaliflexus	1	0.00107252	0.00166626	0.00115703
bacterium_YE59	0.5676	0.0280899	0.00166626	0.000578516
Rubrivivax	0.5676	0.0131256	0.00166626	0.000578516
Bisgaard_Taxon_14	0.5697	0.0455056	0.00166626	0.000578516
Pandoraea	0.571	0.0438202	0.00166626	0.000578516
Enterobacteriaceae_bacterium_159	0.5716	0.0364658	0.00166626	0.000578516
Thauera	0.572	0.0139939	0.00166626	0.000578516
Nicoletella	0.5722	0.0462206	0.00166626	0.000578516
Syntrophomonas	0.5724	0.0106231	0.00166626	0.000578516
Coriobacteriaceae_bacterium_M64	0.5727	0.0291624	0.00166626	0.000578516
Lutispora	0.5731	0.0432074	0.00166626	0.000578516
marine_bacterium_r55	0.5731	0.0340143	0.00166626	0.000578516
bacterium_D8	0.5732	0.0390194	0.00166626	0.000578516
Olsenella	0.5733	0.0294178	0.00166626	0.000578516
Spirillum	0.5736	0.0440756	0.00166626	0.000578516
bacterium_PM51	0.5744	0.0262002	0.00166626	0.000578516
swine_fecal_bacterium_RF1A-Cel4	0.5759	0.0493361	0.00166626	0.000578516
swine_fecal_bacterium_RF1A-Pec4	0.1647	0.0493871	0.00166626	0
Spiroplasma	0.1653	0.0329928	0.00166626	0
bacterium_SM6-6	0.1654	0.0478039	0.00166626	0
bacterium_RI9	0.1656	0.0477528	0.00166626	0
Campylobacter	0.166	0.0324311	0.00166626	0
unidentified_gamma_proteobacterium_S11	0.1662	0.0379469	0.00166626	0
Nitrosospira	0.1663	0.0320735	0.00166626	0
coliform_bacterium_Sc4	0.1665	0.0402962	0.00166626	0
swine_fecal_bacterium_RF2B-Cel1	0.1666	0.034525	0.00166626	0
Halomonas	0.1668	0.0160878	0.00166626	0
Arsenophonus	0.1674	0.0325332	0.00166626	0
primary_endosymbiont_of_Sitophilus_oryzae	0.1676	0.0369765	0.00166626	0
Firmicutes_bacterium_HF6	0.1677	0.0361083	0.00166626	0
bacterium_B39	0.1677	0.0180797	0.00166626	0
mercury-resistant_bacterium_mCFU_609	0.1678	0.0489785	0.00166626	0
Alkaliphilus	0.1678	0.00740552	0.00166626	0
bacterium_G2	0.1679	0.0184883	0.00166626	0
swine_fecal_bacterium_RF2B-Xyl5	0.168	0.0242594	0.00166626	0
human_oral_bacterium_AC24	0.168	0.0223187	0.00166626	0
Paraeggerthella	0.168	0.00061287	0.00166626	0
bacterium_OSW_10	0.1682	0.0392748	0.00166626	0
Dickeya	0.1683	0.0154239	0.00166626	0
Parvimonas_sp._oral_taxon_110	0.1684	0.0307457	0.00166626	0
bacterium_Ba211	0.1685	0.0182329	0.00166626	0
Oxalobacteraceae_bacterium_EH03	0.1686	0.0439734	0.00166626	0
bacterium_RI1	0.1687	0.0477017	0.00166626	0
Ruminobacter	0.1689	0.0145557	0.00166626	0
bacterium_Bm31	0.169	0.0388662	0.00166626	0
Enterobacteriaceae_bacterium_M123	0.169	0.0365679	0.00166626	0
bacterium_EI25	0.1691	0.0391216	0.00166626	0
swine_fecal_bacterium_RF2B-Pec14	0.1692	0.0413687	0.00166626	0
bacterium_mpn-isolate_group_15	0.1695	0.0397855	0.00166626	0
bacterium_DAB_16s_R32(2)	0.1695	0.0390705	0.00166626	0
bacterium_C20	0.1698	0.0389173	0.00166626	0
Alishewanella	0.1699	0.044382	0.00166626	0
coliform_bacterium_S3/104	0.17	0.0484168	0.00166626	0
Firmicutes_str._C38	0.1711	0.01762	0.00166626	0
Lactobacillus_vitulinus	0.1721	0.0117467	0.00166626	0
Lachnospiraceae_bacterium_19gly4	0.0026	0.026762	0.000833132	0.00983478
Lachnospiraceae_bacterium_6-1	0.0063	0.0268131	0.000833132	0.00809923
swine_fecal_bacterium_RF2B-Xyl1	0.0066	0.0495914	0.000833132	0.00809923
Bacteroidales_str._KB9	0.0112	0.0350358	0.000833132	0.00752071
bacterium_ic1395	0.0199	0.0200204	0.000833132	0.00694219
Achromobacter	0.0202	0.0314096	0.000833132	0.00694219
Salinicoccus	0.0203	0.026047	0.000833132	0.00694219
human_oral_bacterium_C65	0.0362	0.0339122	0.000833132	0.00636368
Collimonas	0.0309	0.0318182	0.000833132	0.00578516
Exiguobacterium	0.0536	0.00270684	0.000833132	0.00520665
sapropel_bacterium_J151	0.0553	0.0288049	0.000833132	0.00520665
Selenomonas	0.0563	0.0273238	0.000833132	0.00520665
Bacteroidales_str._KB12	0.057	0.0294688	0.000833132	0.00520665
Clostridiales_bacterium_JN18_V41_S	0.0913	0.042237	0.000833132	0.00462813
Sarcina	0.1498	0.00760981	0.000833132	0.00404961
Anaerosinus	0.1515	0.0272217	0.000833132	0.00404961
Thermoanaerobacter	0.1517	0.011287	0.000833132	0.00404961
Elbe_River_snow_isolate_Iso15_5	0.1527	0.00454545	0.000833132	0.00404961
Methylobacterium	0.1545	0.0275792	0.000833132	0.00404961
mixed_culture_ruminal_bacterium_PAD71	0.157	0.029571	0.000833132	0.00404961
mixed_culture_ruminal_bacterium_PAD193	0.2512	0.00633299	0.000833132	0.0034711
Firmicutes_bacterium_M53	0.2532	0.0121553	0.000833132	0.0034711
human_oral_bacterium_C64	0.2541	0.0338611	0.000833132	0.0034711
Pediococcus	0.4098	0.03524	0.000833132	0.00289258
Firmicutes_str._C34	0.4101	0.0279367	0.000833132	0.00289258
Mycoplasma	0.4101	0.0173136	0.000833132	0.00289258
Firmicutes_bacterium_EG18	0.4134	0.0274259	0.000833132	0.00289258
Hydrogenophilus	0.4147	0.0440245	0.000833132	0.00289258
Bacteroidales_str._KB13	0.4107	0.00081716	0.000833132	0.00231406
Desulfitobacterium	0.4121	0.0270174	0.000833132	0.00231406
Rhodococcus	0.4124	0.025383	0.000833132	0.00231406
bacterium_mpn-isolate_group_3	0.4127	0.0205312	0.000833132	0.00231406
Clostridiaceae_bacterium_NML_061030	0.4159	0.00704801	0.000833132	0.00231406
Hydrogenophaga	0.416	0.0438713	0.000833132	0.00231406
human_oral_bacterium_C66	0.4173	0.0339632	0.000833132	0.00231406
Atopobium	0.4201	0.0292135	0.000833132	0.00231406
Nesterenkonia	0.6463	0.000255363	0.000833132	0.00173555
Eubacteriaceae_bacterium_NML_070849	0.6465	0.0308478	0.000833132	0.00173555
Elizabethkingia	0.6472	0.0256384	0.000833132	0.00173555
bacterium_mpn-isolate_group_21	0.6473	0.0482125	0.000833132	0.00173555
iron-reducing_bacterium_P4	0.6483	0.0224719	0.000833132	0.00173555
swine_fecal_bacterium_FPC110	0.6485	0.0238509	0.000833132	0.00173555
swine_manure_pit_bacterium_PPC93	0.6487	0.0289581	0.000833132	0.00173555
Rhizobium	0.6495	0.0128192	0.000833132	0.00173555
Clostridiales_bacterium_oral_taxon_093	0.6497	0.0261491	0.000833132	0.00173555
Bacteroidetes_bacterium_oral_taxon_272	0.6499	0.0302349	0.000833132	0.00173555
swine_manure_pit_bacterium_PPC12B	0.6511	0.0498979	0.000833132	0.00173555
bacterium_Q20	0.6514	0.0186415	0.000833132	0.00173555
swine_fecal_bacterium_RF1A-Xyl3	1	0.0494893	0.000833132	0.00115703
bovine_rumen_bacterium_JPR15	1	0.0483146	0.000833132	0.00115703
Clostridiisalibacter	1	0.0431563	0.000833132	0.00115703
intranuclear_bacterium_of_Bathymodiolus_spp.	1	0.0405516	0.000833132	0.00115703
anaerobic_bacterium_U3/P-1	1	0.0382022	0.000833132	0.00115703
Anaerospora	1	0.035904	0.000833132	0.00115703
Pigmentiphaga	1	0.0314607	0.000833132	0.00115703
Syntrophothermus	1	0.0311032	0.000833132	0.00115703
Helcococcus	1	0.0307967	0.000833132	0.00115703
Prevotellaceae_bacterium_WR041	1	0.0297753	0.000833132	0.00115703
Prevotellaceae_bacterium_DJF_RP84	1	0.0296731	0.000833132	0.00115703
Kocuria	1	0.0290603	0.000833132	0.00115703
butyrate-producing_bacterium_PH05YA06	1	0.0283453	0.000833132	0.00115703
bacterium_XB45	1	0.0258938	0.000833132	0.00115703
Bacteroidetes_bacterium_'Oral_Taxon_274'	1	0.0258427	0.000833132	0.00115703
Ruminobacillus	1	0.0251788	0.000833132	0.00115703
swine_manure_pit_bacterium_PPC91	1	0.0248723	0.000833132	0.00115703
bacterium_061128-OL-KR37-AA_3-0_10000x_-1A	1	0.0179265	0.000833132	0.00115703
Acetobacterium	1	0.00812053	0.000833132	0.00115703
Clostridiaceae_bacterium_rennanqilyf6	1	0.00735444	0.000833132	0.00115703
Bacillaceae_bacterium_BL-149	1	0.00280899	0.000833132	0.00115703
Porphyromonadaceae_bacterium_NML_060648	1	0.00117467	0.000833132	0.00115703
actinobacterium_SOC_A20(63)	1	0.000715015	0.000833132	0.00115703
bacterium_Irt-JG1-68	1	0.0475996	0.000833132	0.000578516
Bibersteinia	1	0.0460163	0.000833132	0.000578516
Pasteurella_aerogenes	1	0.0458121	0.000833132	0.000578516
Afipia	1	0.0435649	0.000833132	0.000578516
Vagococcus	1	0.0430031	0.000833132	0.000578516
Trichococcus	1	0.042952	0.000833132	0.000578516
Dolosigranulum	1	0.0429009	0.000833132	0.000578516
Ureibacillus	1	0.0427988	0.000833132	0.000578516
swine_manure_pit_bacterium_PPC14	1	0.0419305	0.000833132	0.000578516
bovine_rumen_bacterium_JPR8	1	0.0400919	0.000833132	0.000578516
bacterium_Bf4	1	0.038713	0.000833132	0.000578516
endosymbiont_of_Bathymodiolus_azoricus	1	0.0377937	0.000833132	0.000578516
Proteus	1	0.037334	0.000833132	0.000578516
Rheinheimera	1	0.0363126	0.000833132	0.000578516
Azospirillum	1	0.0362104	0.000833132	0.000578516
Lachnospiraceae_bacterium_3-1	1	0.0358018	0.000833132	0.000578516
Heliobacterium	1	0.0357508	0.000833132	0.000578516
Linmingia	1	0.0355975	0.000833132	0.000578516
Clostridiaceae_bacterium_80Kb	1	0.0354443	0.000833132	0.000578516
Clostridiales_bacterium_r41	1	0.0353933	0.000833132	0.000578516
Gordonibacter	1	0.0349847	0.000833132	0.000578516
human_intestinal_bacterium_SNU-Julong732	1	0.0348825	0.000833132	0.000578516
unidentified_bacterium_ZF1	1	0.0346272	0.000833132	0.000578516
Peptococcaceae_bacterium_AHT17	1	0.031001	0.000833132	0.000578516
bacterium_HY-42-22	1	0.0305924	0.000833132	0.000578516
Polaribacter	1	0.0299285	0.000833132	0.000578516
Propionispira	1	0.0272727	0.000833132	0.000578516
Desulfonispora	1	0.0270684	0.000833132	0.000578516
unidentified_eubacterium_clone_BSV75	1	0.0251277	0.000833132	0.000578516
swine_fecal_bacterium_RF2B-Pec2	1	0.0242084	0.000833132	0.000578516
rumen_bacterium_8/9293-1A	1	0.0230848	0.000833132	0.000578516
Xanthomonas	1	0.0167518	0.000833132	0.000578516
Cycloclasticus	1	0.0165475	0.000833132	0.000578516
Anaeromyxobacter	1	0.0141982	0.000833132	0.000578516
Laribacter	1	0.0137896	0.000833132	0.000578516
Chromobacterium	1	0.0137385	0.000833132	0.000578516
Delftia	1	0.0136874	0.000833132	0.000578516
Polynucleobacter	1	0.0135853	0.000833132	0.000578516
Moorella	1	0.0111849	0.000833132	0.000578516
Desulfovirgula	1	0.0111338	0.000833132	0.000578516
Anaeroglobus	1	0.0107763	0.000833132	0.000578516
Sporacetigenium	1	0.00766088	0.000833132	0.000578516
Lysinibacillus	1	0.00311542	0.000833132	0.000578516
Candidatus_Amoebophilus	1	0.00240041	0.000833132	0.000578516
gut_bacterium_S2_of_Coptotermes_formosanus	1	0.00229826	0.000833132	0.000578516
rumen_bacterium_2/9293-15	0.4045	0.0227273	0.000833132	0
Enterorhabdus	0.4046	0.0349336	0.000833132	0
nitrogen-fixing_bacterium_CC262C	0.4047	0.0368744	0.000833132	0
Marinilactibacillus	0.4052	0.003524	0.000833132	0
bacterium_spbL3type3	0.4055	0.0398366	0.000833132	0
unidentified_sulphate_reducing_bacterium_DSV-DSa99-5	0.4055	0.0143514	0.000833132	0
glacial_ice_bacterium_MS-T3-04	0.4056	0.0216037	0.000833132	0
bacterium_Ellin6108	0.4057	0.0435138	0.000833132	0
Elbe_River_snow_isolate_Iso11_1	0.4057	0.0430541	0.000833132	0
Lactobacillus_catenaformis	0.4057	0.0116956	0.000833132	0
bovine_rumen_bacterium_JPR11	0.4061	0.0482635	0.000833132	0
anaerobic_bacterium_B124	0.4063	0.0468846	0.000833132	0
Thermohalobacter	0.4064	0.0356486	0.000833132	0
Joostella	0.4064	0.0298774	0.000833132	0
Tepidanaerobacter	0.4064	0.011236	0.000833132	0
bacterium_CCSD_DF2030_Ag68_isolate_2	0.4065	0.0334014	0.000833132	0
anaerobic_bacterium_B158	0.4065	0.0177222	0.000833132	0
bacterium_110	0.4067	0.0471399	0.000833132	0
unidentified_eubacterium_clone_BSV77	0.4067	0.0421348	0.000833132	0
Firmicutes_bacterium_SD1	0.4068	0.0434116	0.000833132	0
Centipeda	0.4068	0.0359551	0.000833132	0
bacterium_RK80_tank	0.4068	0.0335036	0.000833132	0
Enterobacteriaceae_bacterium_v444	0.4069	0.0448927	0.000833132	0
Elbe_River_snow_isolate_Iso15_4	0.4069	0.0431052	0.000833132	0
Succinimonas	0.4069	0.0146067	0.000833132	0
Haliscomenobacter	0.4069	0.00209397	0.000833132	0
rumen_bacterium_15/9293-13	0.407	0.0226251	0.000833132	0
soybean_epiphytic_bacterium_EP405	0.4071	0.0410112	0.000833132	0
gamma_proteobacterium_UMB3A	0.4071	0.016905	0.000833132	0
Arthronema	0.4071	0.00250255	0.000833132	0
Procabacter	0.4072	0.0138917	0.000833132	0
Brucella	0.4072	0.0127171	0.000833132	0
actinobacterium_Aac-35	0.4073	0.0426456	0.000833132	0
Firmicutes_bacterium_EG20	0.4073	0.0360572	0.000833132	0
coliform_bacterium_Sc8	0.4073	0.0215526	0.000833132	0
bacterium_spbL5type1	0.4074	0.0398876	0.000833132	0
Bacterium_MPB_DPMF2	0.4075	0.0175179	0.000833132	0
bacterium_B30	0.4076	0.0473953	0.000833132	0
anaerobic_bacterium_B9	0.4076	0.0469867	0.000833132	0
selenate-reducing_bacterium_TSA	0.4076	0.0151175	0.000833132	0
Clostridiales_bacterium_r14	0.4076	0.00449438	0.000833132	0
swine_fecal_bacterium_RF1A-Xyl2	0.4077	0.0494382	0.000833132	0
swine_fecal_bacterium_FPC50	0.4077	0.0411645	0.000833132	0
Mobiluncus	0.4077	0.0346782	0.000833132	0
beta_proteobacterium_pCyN2	0.4077	0.03238	0.000833132	0
Clostridiaceae_bacterium_rennanqilyf12	0.4077	0.00730337	0.000833132	0
bacterium_005-3	0.4078	0.0331971	0.000833132	0
Cytophaga_sp._Dex80-43	0.4078	0.0126149	0.000833132	0
gamma_proteobacterium_symbiont_of_Pseudococcus_longispinus	0.4079	0.0467824	0.000833132	0
endophytic_bacterium_C05	0.4079	0.0403984	0.000833132	0
Marichromatium	0.4079	0.0324821	0.000833132	0
beta_proteobacterium_NOS8	0.408	0.0442799	0.000833132	0
Simplicispira	0.408	0.0439224	0.000833132	0
Dokdonia	0.408	0.00178754	0.000833132	0
endophytic_bacterium_C10	0.4081	0.0485189	0.000833132	0
bacterium_G13	0.4081	0.0475485	0.000833132	0
anaerobic_bacterium_B153	0.4081	0.0381001	0.000833132	0
Thermoflavimicrobium	0.4081	0.035189	0.000833132	0
mastodon_intestinal_bacterium_18.37.BG.2	0.4082	0.0449949	0.000833132	0
gamma_proteobacterium_pp5a	0.4082	0.0378958	0.000833132	0
Firmicutes_bacterium_10827	0.4082	0.0360061	0.000833132	0
bacterium_234	0.4082	0.0332993	0.000833132	0
Cimex_lectularius_endosymbiont	0.4083	0.0445352	0.000833132	0
Antarctic_seawater_bacterium_Bsw10180	0.4083	0.0330439	0.000833132	0
Shinella	0.4083	0.0312053	0.000833132	0
Bacillales_bacterium_Gsoil_1105	0.4083	0.00255363	0.000833132	0
Methylobacteriaceae_bacterium_KVD-1921-03	0.4084	0.043667	0.000833132	0
bacterium_SFS2-2-1	0.4084	0.0393769	0.000833132	0
bacterium_2-TKL1	0.4084	0.0383555	0.000833132	0
Xenorhabdus	0.4084	0.0375894	0.000833132	0
Ewingella	0.4084	0.0371297	0.000833132	0
beta_proteobacterium_JN18_V62_Y	0.4084	0.0322268	0.000833132	0
Pyramidobacter	0.4084	0.0172114	0.000833132	0
Arctic_sea_ice_bacterium_AWS-4M2	0.4085	0.0464249	0.000833132	0
marine_bacterium_CS-2	0.4085	0.0406027	0.000833132	0
bacterium_ISW_15	0.4085	0.0392237	0.000833132	0
Enterobacteriaceae_bacterium_KVD-1959-07	0.4085	0.0365169	0.000833132	0
Candidatus_Hamiltonella	0.4086	0.0453013	0.000833132	0
bacterium_Te93R	0.4086	0.0395301	0.000833132	0
anaerobic_bacterium_A131	0.4086	0.037998	0.000833132	0
Enhydrobacter	0.4086	0.0164454	0.000833132	0
secondary_endosymbiont_of_Glycaspis_brimblecombei	0.4087	0.0150664	0.000833132	0
Finegoldia	0.4087	0.00776302	0.000833132	0
swine_manure_bacterium_RT-3B	0.4088	0.0498468	0.000833132	0
anaerobic_bacterium_B144	0.4088	0.0469356	0.000833132	0
Fe(III)-reducing_bacterium_JX-a20	0.4088	0.0468335	0.000833132	0
gamma_proteobacterium_SSCT62	0.4088	0.0467314	0.000833132	0
gamma_proteobacterium_RBE2CD-47	0.4088	0.0466803	0.000833132	0
Bisgaard_Taxon_17	0.4088	0.0455567	0.000833132	0
Candidatus_Portiera	0.4088	0.0454035	0.000833132	0
Roseovarius	0.4088	0.0437181	0.000833132	0
anaerobic_bacterium_B120	0.4088	0.038049	0.000833132	0
haloalkaliphilic_bacterium_EMB4	0.4088	0.0351379	0.000833132	0
Bacteroidetes_bacterium_Smarlab_3301186	0.4088	0.0301839	0.000833132	0
rumen_bacterium_R-25	0.4088	0.0235955	0.000833132	0
marine_gamma_proteobacterium_S5	0.4088	0.0170072	0.000833132	0
swine_fecal_bacterium_RF3D-Xyl1	0.4089	0.0416241	0.000833132	0
Moellerella	0.4089	0.0372829	0.000833132	0
low_G+C_Gram-positive_bacterium_IRB_1	0.4089	0.0124106	0.000833132	0
bacterium_147	0.409	0.047191	0.000833132	0
Histophilus	0.409	0.0461696	0.000833132	0
secondary_endosymbiont_of_Bemisia_tabaci	0.409	0.045097	0.000833132	0
permafrost_bacterium_DT-IV23	0.409	0.0340654	0.000833132	0
low_G+C_Gram-positive_bacterium_MPD-67	0.409	0.0311542	0.000833132	0
bacterium_DR304	0.4091	0.0474464	0.000833132	0
Enterobacteriaceae_bacterium_M514	0.4091	0.0447395	0.000833132	0
bacterium_SM_3	0.4091	0.039428	0.000833132	0
gamma_proteobacterium_SSCT67	0.4091	0.0378447	0.000833132	0
primary_endosymbiont_of_Pseudolynchia_canariensis	0.4091	0.0369254	0.000833132	0
groundwater_biofilm_bacterium_S3	0.4091	0.03381	0.000833132	0
anaerobic_bacterium_B122	0.4091	0.0331461	0.000833132	0
Turneriella	0.4091	0.0329418	0.000833132	0
mycetome_symbiont_of_Placobdelloides_jaegerskioeldi	0.4092	0.045046	0.000833132	0
Micrococcineae_bacterium_ASTYA1	0.4092	0.0425434	0.000833132	0
coliform_bacterium_S1/2	0.4092	0.040143	0.000833132	0
biocide-degrading_bacterium_106	0.4092	0.0399898	0.000833132	0
Tissierella	0.4092	0.0356997	0.000833132	0
Enterobacteriaceae_bacterium_Smarlab_3302238	0.4092	0.0149132	0.000833132	0
Enterobacteriaceae_bacterium_GK-2	0.4092	0.0148621	0.000833132	0
Pasteurellaceae_bacterium_C67	0.4093	0.0459142	0.000833132	0
Bisgaard_Taxon_37	0.4093	0.0456588	0.000833132	0
soil_bacterium_Levo-S1T-M1LLLSSL-2	0.4093	0.0409091	0.000833132	0
bacterium_T7	0.4093	0.0188968	0.000833132	0
bacterium_YC-8	0.4094	0.047906	0.000833132	0
bacterium_17-CDL1	0.4094	0.0472421	0.000833132	0
endosymbiont_RT12_of_Lyrodus_pedicellatus	0.4094	0.046476	0.000833132	0
Anaerorhabdus	0.4094	0.0426966	0.000833132	0
endophytic_bacterium_Y02	0.4094	0.0405005	0.000833132	0
human_oral_bacterium_C5	0.4095	0.0489275	0.000833132	0
Tetrathiobacter	0.4095	0.0437692	0.000833132	0
swine_fecal_bacterium_RF2C-Xyl1	0.4095	0.0414709	0.000833132	0
marine_bacterium_CS-74	0.4095	0.0406537	0.000833132	0
bacterium_15RD	0.4095	0.0383044	0.000833132	0
Enterobacteriaceae_bacterium_M508	0.4095	0.036619	0.000833132	0
Tuber_borchii_symbiont_b-Z43	0.4095	0.0303882	0.000833132	0
bacterium_RSD-1-4	0.4095	0.0187947	0.000833132	0
Salinibacterium	0.4095	0.000153218	0.000833132	0
bacterium_UASWS0127	0.4096	0.047855	0.000833132	0
Gram-negative_bacterium_CCBAU_41088	0.4096	0.0449438	0.000833132	0
soybean_endophytic_bacterium_EN193	0.4096	0.0409602	0.000833132	0
Coriobacteriaceae_bacterium_M3	0.4096	0.0291113	0.000833132	0
gamma_proteobacterium_Hp20b	0.4097	0.0466292	0.000833132	0
LMWdDNA-degrading_marine_bacterium_3	0.4097	0.033095	0.000833132	0
Bacteroidetes_bacterium_DQHS-4	0.4097	0.0300306	0.000833132	0
alpha_proteobacterium_ARP-E12	0.4097	0.0129724	0.000833132	0
bacterium_Zye2	0.4098	0.0479571	0.000833132	0
bacterium_33RD	0.4098	0.0384576	0.000833132	0
benzene-decomposing_bacterium_S5	0.4098	0.0207354	0.000833132	0
delta_proteobacterium_BL50	0.4098	0.0143003	0.000833132	0
Gallicola	0.4098	0.0078141	0.000833132	0
swine_fecal_bacterium_RF2B-Pec1	0.4099	0.0495403	0.000833132	0
gamma_proteobacterium_HRG12	0.4099	0.0465781	0.000833132	0
rumen_bacterium_A54	0.4099	0.0407559	0.000833132	0
Cytophagales_str._QSSC5-1	0.4099	0.0303371	0.000833132	0
bacterium_UASWS0103	0.4099	0.0190501	0.000833132	0
Enterobacteriaceae_bacterium_HH31	0.41	0.0446374	0.000833132	0
Vibrionaceae_bacterium_DS3	0.41	0.0377426	0.000833132	0
Frankia	0.41	0.0290092	0.000833132	0
bacterium_TSBY-79	0.41	0.0189479	0.000833132	0
Treponema	0.41	0.0171604	0.000833132	0
Fructobacillus	0.41	0.00367722	0.000833132	0
obligately_oligotrophic_bacteria_POCPN-74	0.41	0.00234934	0.000833132	0
endophytic_bacterium_WR6A-1	0.4102	0.0488253	0.000833132	0
Sedimentibacter	0.4102	0.0432584	0.000833132	0
swine_fecal_bacterium_RF3F-Cel3	0.4102	0.0416752	0.000833132	0
soybean_epiphytic_bacterium_EP92	0.4102	0.0410623	0.000833132	0
Chitinimonas	0.4102	0.0315628	0.000833132	0
bacterium_PB90-2	0.4102	0.00224719	0.000833132	0
rumen_bacterium_R2-10	0.4103	0.0491318	0.000833132	0
bacterium_B28	0.4103	0.0473442	0.000833132	0
Enterobacteriaceae_bacterium_M019	0.4103	0.0446885	0.000833132	0
Achromatium	0.4103	0.0166496	0.000833132	0
endophytic_bacterium_HA03	0.4104	0.0487232	0.000833132	0
beta_proteobacterium_HINUF001	0.4104	0.0441267	0.000833132	0
bacterium_ST6	0.4104	0.0394791	0.000833132	0
beta_proteobacterium_HS5/S24542	0.4104	0.0362615	0.000833132	0
soil_bacterium_Nali-S1N-M1LLLSSL-3	0.4104	0.0237998	0.000833132	0
Turicibacter	0.4104	0.011951	0.000833132	0
rumen_bacterium_E57	0.4105	0.0490296	0.000833132	0
endophytic_bacterium_CK07	0.4105	0.04857	0.000833132	0
Pasteurella_aerogenes_MCCM_01550	0.4105	0.0458631	0.000833132	0
Moritella	0.4105	0.0444842	0.000833132	0
endophytic_bacterium_C04	0.4105	0.0403473	0.000833132	0
bacterium_V7	0.4105	0.0396323	0.000833132	0
Wigglesworthia	0.4105	0.0375383	0.000833132	0
Algoriphagus	0.4105	0.0299796	0.000833132	0
Cryptobacterium	0.4105	0.0293667	0.000833132	0
Burkholderiaceae_bacterium_KF045	0.4105	0.0134321	0.000833132	0
bacterium_b1cb16	0.4106	0.0480082	0.000833132	0
endophytic_bacterium_CR1b	0.4107	0.0486721	0.000833132	0
bacterium_KA55	0.4107	0.0476507	0.000833132	0
bacterium_10RD	0.4107	0.0470889	0.000833132	0
Phocoenobacter	0.4107	0.0462717	0.000833132	0
Nitrobacter	0.4107	0.0436159	0.000833132	0
swine_manure_bacterium_RT-4A	0.4107	0.0417773	0.000833132	0
Oscillatoria	0.4108	0.0427477	0.000833132	0
endophytic_bacterium_CK14	0.4108	0.0404494	0.000833132	0
Rhodoplanes	0.4108	0.0361593	0.000833132	0
Enterobacteriaceae_bacterium_M529	0.4109	0.0447906	0.000833132	0
bacterium_CWISO16	0.4109	0.0389683	0.000833132	0
Streptococcaceae_bacterium_RF32	0.4109	0.0352911	0.000833132	0
Aquabacterium	0.4109	0.0313075	0.000833132	0
endophytic_bacterium_CK13	0.411	0.048621	0.000833132	0
secondary_endosymbiont_of_Trioza_magnoliae	0.411	0.0451481	0.000833132	0
Holdemania	0.411	0.0433095	0.000833132	0
bacterium_A1(2009)	0.411	0.0385598	0.000833132	0
bacterium_MACB	0.411	0.0149642	0.000833132	0
Caulobacteraceae_bacterium_WH143	0.411	0.012666	0.000833132	0
swine_fecal_bacterium_RF3E-Xyl2	0.4111	0.0496425	0.000833132	0
rumen_bacterium_E7	0.4111	0.0490807	0.000833132	0
Varibaculum	0.4111	0.0347293	0.000833132	0
Bacteroidetes_bacterium_SM32	0.4111	0.0301328	0.000833132	0
Dietzia	0.4112	0.0347804	0.000833132	0
beta_proteobacterium_W-2029	0.4112	0.0323289	0.000833132	0
bacterium_1B8	0.4112	0.0180286	0.000833132	0
Volucribacter	0.4113	0.0463228	0.000833132	0
bacterium_UASWS0098	0.4113	0.0395812	0.000833132	0
bacterium_EI27	0.4113	0.0391726	0.000833132	0
Azovibrio	0.4113	0.0321246	0.000833132	0
bacterium_1-wrinkle	0.4113	0.0179775	0.000833132	0
bacterium_236	0.4114	0.0384065	0.000833132	0
Azomonas	0.4114	0.0328396	0.000833132	0
bacterium_Ellin6067	0.4114	0.0140449	0.000833132	0
Enterobacteriales_bacterium_LBRN-NC07	0.4115	0.0363636	0.000833132	0
rape_rhizosphere_bacterium_m9092	0.4115	0.0341675	0.000833132	0
Bacteroidetes_bacterium_S22-34	0.4115	0.0300817	0.000833132	0
Pseudoramibacter	0.4115	0.00822268	0.000833132	0
Gram-positive_bacterium_str._13-2	0.4115	0.000663943	0.000833132	0
bacterium_flour_#16	0.4116	0.0481103	0.000833132	0
Arctic_sea_ice_bacterium_ARK10108	0.4116	0.0146578	0.000833132	0
swine_fecal_bacterium_RF3E-Xyl3	0.4117	0.0496936	0.000833132	0
Ferrimonas	0.4117	0.0444331	0.000833132	0
Mesorhizobium	0.4117	0.0127681	0.000833132	0
beta_proteobacterium_W-2002	0.4118	0.0443309	0.000833132	0
Corallococcus	0.4118	0.0142492	0.000833132	0
sponge_bacterium_XM6	0.4119	0.049285	0.000833132	0
soybean_endophytic_bacterium_EN217	0.4119	0.0492339	0.000833132	0
bacterium_ES5	0.4119	0.0474974	0.000833132	0
bacterium_21-LDL1	0.4119	0.0472932	0.000833132	0
thermal_spring_bacterium_1C	0.4119	0.0420327	0.000833132	0
anaerobic_bacterium_B178	0.4119	0.0381512	0.000833132	0
bacterium_ROME1151sh	0.4119	0.0187436	0.000833132	0
Eubacteriaceae_bacterium_WK012	0.4119	0.00801839	0.000833132	0
marine_bacterium_SIMO-4463	0.412	0.0407048	0.000833132	0
bacterium_Bm21	0.412	0.018335	0.000833132	0
bacterium_S119(2009)	0.4121	0.0393258	0.000833132	0
marine_bacterium_GY27	0.4121	0.0169561	0.000833132	0
Psychrobacter	0.4122	0.0463739	0.000833132	0
bacterium_204	0.4122	0.0332482	0.000833132	0
beta_proteobacterium_MB18	0.4123	0.0442288	0.000833132	0
Cytophagales_str._MED9	0.4123	0.030286	0.000833132	0
Thiomicrospira	0.4123	0.0165986	0.000833132	0
swine_manure_pit_bacterium_PPC99	0.4124	0.0499489	0.000833132	0
gamma-symbiont_of_Antonina_crawii	0.4124	0.0168029	0.000833132	0
endophytic_bacterium_Y01	0.4125	0.0488764	0.000833132	0
Enterobacteriaceae_bacterium_RF2	0.4126	0.0367211	0.000833132	0
Burkholderiaceae_bacterium_L670_RDt	0.4126	0.0315117	0.000833132	0
symbiont_of_Myzocallis_sp.	0.4126	0.0151685	0.000833132	0
Bisgaard_Taxon_7	0.4127	0.045761	0.000833132	0
Candidatus_Regiella	0.4127	0.0370787	0.000833132	0
Flavobacteriaceae_bacterium_ACEMC_5-8	0.4127	0.0298264	0.000833132	0
bacterium_mpn-isolate_group_8	0.4127	0.0206333	0.000833132	0
swine_fecal_bacterium_RF3G-Cel4	0.4128	0.0497446	0.000833132	0
swine_manure_bacterium_RT-5A	0.4128	0.0418795	0.000833132	0
Enterobacteriaceae_bacterium_RR45	0.4129	0.0448417	0.000833132	0
endosymbiont_of_Alviniconcha_sp._type1	0.4129	0.0337589	0.000833132	0
swine_fecal_bacterium_FPC69	0.413	0.0240041	0.000833132	0
secondary_symbiont_type-U_of_Pemphigus_betae	0.4132	0.0451992	0.000833132	0
gamma_proteobacterium_GA-30	0.4133	0.0465271	0.000833132	0
bacterium_1-4	0.4134	0.0470378	0.000833132	0
marine_bacterium_HP29	0.4134	0.0350868	0.000833132	0
Buttiauxella	0.4135	0.0370276	0.000833132	0
bacterium_dtb45	0.4135	0.0336057	0.000833132	0
endophytic_bacterium_HB04	0.4136	0.0487743	0.000833132	0
Enterobacteriaceae_bacterium_GA03	0.4136	0.0445863	0.000833132	0
Enterobacteriaceae_bacterium_OYS2	0.4136	0.0366701	0.000833132	0
endophyte_bacterium_SS05	0.4137	0.0484678	0.000833132	0
Buchnera	0.4139	0.0152707	0.000833132	0
swine_manure_bacterium_RT-4B	0.4143	0.0418284	0.000833132	0
bacterium_#WM-B26	0.4143	0.0382533	0.000833132	0
Marinobacter	0.4143	0.0147089	0.000833132	0
soil_bacterium_PM6-P2-6	0.4144	0.0491828	0.000833132	0
bacterium_btn_18a-3	0.4144	0.0480592	0.000833132	0
thermophilic_bacterium_JA2	0.4148	0.0434627	0.000833132	0
2	1	1	0.000833132	0
2	1	1	0.000833132	0
rumen_bacterium_YS1	NA	10	0	2.20935
Prevotellaceae_bacterium_DJF_CR62	NA	10	0	0.285208
swine_fecal_bacterium_FPC63	NA	10	0	0.0341325
swine_fecal_bacterium_SD-Xyl5	NA	10	0	0.0260332
Bacteroidales_bacterium_JN18_V15_G	NA	10	0	0.0196696
bacterium_mpn-isolate_group_1	NA	10	0	0.0156199
bacterium_mpn-isolate_group_6	NA	10	0	0.0156199
Thermolithobacter	NA	10	0	0.0156199
swine_fecal_bacterium_SD-Pec8	NA	10	0	0.0138844
Bacteroidales_str._KB1	NA	10	0	0.0115703
Prevotellaceae_bacterium_P4P_62_P1	NA	10	0	0.00983478
bacterium_mpn-isolate_group_4	NA	10	0	0.00867774
Prevotellaceae_bacterium_DJF_CR25	NA	10	0	0.00809923
rumen_bacterium_2/9293-18	NA	10	0	0.00809923
Janthinobacterium	NA	10	0	0.00694219
Prevotellaceae_bacterium_DJF_CR21k6	NA	10	0	0.00636368
bacterium_BAF4	NA	10	0	0.00462813
bacterium_Irt-JG1-53	NA	10	0	0.00462813
bovine_rumen_bacterium_JPR22	NA	10	0	0.00404961
Cupriavidus	NA	10	0	0.00404961
bacterium_070808-OL-KR13-SRB_2-0_10000x_-1B	NA	10	0	0.0034711
bacterium_TC8	NA	10	0	0.0034711
Brevundimonas	NA	10	0	0.0034711
Methylomonas_methylovora	NA	10	0	0.0034711
Persicirhabdus	NA	10	0	0.0034711
Prevotellaceae_bacterium_DJF_LS10	NA	10	0	0.0034711
Prosthecobacter	NA	10	0	0.0034711
Alteromonas	NA	10	0	0.00289258
Anoxybacillus	NA	10	0	0.00289258
Caloramator	NA	10	0	0.00289258
Candidatus_Sulcia	NA	10	0	0.00289258
Firmicutes_sp._oral_strain_FTB41	NA	10	0	0.00289258
Mycobacterium	NA	10	0	0.00289258
Sinorhizobium	NA	10	0	0.00289258
swine_manure_pit_bacterium_PPC42	NA	10	0	0.00289258
Synechococcus	NA	10	0	0.00289258
Tannerella	NA	10	0	0.00289258
Thermodesulfobium	NA	10	0	0.00289258
Alicyclobacillus	NA	10	0	0.00231406
Anaerococcus	NA	10	0	0.00231406
bacterium_IrT-JG1-59	NA	10	0	0.00231406
Beggiatoa	NA	10	0	0.00231406
drinking_water_bacterium_M3	NA	10	0	0.00231406
Duganella	NA	10	0	0.00231406
Firmicutes_bacterium_1229-1IIA	NA	10	0	0.00231406
Jonesia	NA	10	0	0.00231406
Lautropia	NA	10	0	0.00231406
Microbacterium	NA	10	0	0.00231406
Ruminofilibacter	NA	10	0	0.00231406
Sphaerotilus	NA	10	0	0.00231406
Stenotrophomonas	NA	10	0	0.00231406
swine_manure_pit_bacterium_PPC26	NA	10	0	0.00231406
swine_manure_pit_bacterium_PPC92	NA	10	0	0.00231406
unidentified_eubacterium_clone_BSV07	NA	10	0	0.00231406
Xylella	NA	10	0	0.00231406
Zoogloea	NA	10	0	0.00231406
Aneurinibacillus	NA	10	0	0.00173555
bacterium_10C29	NA	10	0	0.00173555
bacterium_1B1b	NA	10	0	0.00173555
bacterium_DR2A-6G4	NA	10	0	0.00173555
bacterium_mpn-isolate_group_26	NA	10	0	0.00173555
Bartonella	NA	10	0	0.00173555
Blattabacterium	NA	10	0	0.00173555
bovine_rumen_bacterium_JPR20	NA	10	0	0.00173555
Bradyrhizobium	NA	10	0	0.00173555
Bulleidia	NA	10	0	0.00173555
butyrate-producing_bacterium_SM7/11	NA	10	0	0.00173555
candidate_division_TM7_genomosp._P1	NA	10	0	0.00173555
Candidatus_Azobacteroides	NA	10	0	0.00173555
Clostridiaceae_bacterium_JN18_V56_P	NA	10	0	0.00173555
Coxiella	NA	10	0	0.00173555
extreme_arid_zone_bacterium_HX-IIF08	NA	10	0	0.00173555
Firmicutes_bacterium_M42	NA	10	0	0.00173555
Firmicutes_str._C33	NA	10	0	0.00173555
Gram-negative_bacterium_cTPY-13	NA	10	0	0.00173555
human_oral_bacterium_C67	NA	10	0	0.00173555
Microcoleus	NA	10	0	0.00173555
Naxibacter	NA	10	0	0.00173555
Roseomonas	NA	10	0	0.00173555
rumen_bacterium_RC-2	NA	10	0	0.00173555
Slackia	NA	10	0	0.00173555
swine_fecal_bacterium_RF1A-Pec3	NA	10	0	0.00173555
swine_manure_bacterium_37-3	NA	10	0	0.00173555
swine_manure_pit_bacterium_PPC37	NA	10	0	0.00173555
Tetragenococcus	NA	10	0	0.00173555
unidentified_eubacterium_clone_BSV74	NA	10	0	0.00173555
Vitreoscilla	NA	10	0	0.00173555
Actinocorallia	NA	10	0	0.00115703
Alcaligenaceae_bacterium_BZ45	NA	10	0	0.00115703
Alkalibacterium	NA	10	0	0.00115703
anaerobic_bacterium_A116	NA	10	0	0.00115703
anaerobic_bacterium_A127	NA	10	0	0.00115703
bacterium_str._Rauti	NA	10	0	0.00115703
Bacteroidales_bacterium_DJF_B268	NA	10	0	0.00115703
Bacteroidales_str._KB11	NA	10	0	0.00115703
Bacteroidetes_bacterium_DQHS-8	NA	10	0	0.00115703
Bacteroidetes_bacterium_M-phe-1	NA	10	0	0.00115703
butyrate-producing_bacterium_L2-10	NA	10	0	0.00115703
Candidatus_Symbiothrix	NA	10	0	0.00115703
Carboxydothermus	NA	10	0	0.00115703
Chelatococcus	NA	10	0	0.00115703
Chlamydiales_symbiont_of_Salmo_salar	NA	10	0	0.00115703
Chlorobium	NA	10	0	0.00115703
Chlorogloeopsis	NA	10	0	0.00115703
Clostridia_bacterium_TSW07CA9	NA	10	0	0.00115703
Clostridiaceae_bacterium_80Wd	NA	10	0	0.00115703
Clostridiaceae_bacterium_DJF_VP39k1	NA	10	0	0.00115703
Clostridiaceae_bacterium_FN062	NA	10	0	0.00115703
Clostridiales_bacterium_1-IIB	NA	10	0	0.00115703
Derxia	NA	10	0	0.00115703
Desulfomicrobium	NA	10	0	0.00115703
Desulfosporosinus	NA	10	0	0.00115703
Facklamia	NA	10	0	0.00115703
Firmicutes_bacterium_VNs44	NA	10	0	0.00115703
Garciella	NA	10	0	0.00115703
Geobacter	NA	10	0	0.00115703
Halanaerobium	NA	10	0	0.00115703
Halobacillus	NA	10	0	0.00115703
Helicobacter	NA	10	0	0.00115703
Heliorestis	NA	10	0	0.00115703
Iodobacter	NA	10	0	0.00115703
Jeotgalicoccus	NA	10	0	0.00115703
Lawsonia	NA	10	0	0.00115703
Leptothrix	NA	10	0	0.00115703
Listeria	NA	10	0	0.00115703
marine_bacterium_CS-1	NA	10	0	0.00115703
Marinilabilia	NA	10	0	0.00115703
Methylococcus	NA	10	0	0.00115703
Methylophilus	NA	10	0	0.00115703
Mitsuaria	NA	10	0	0.00115703
Moraxella	NA	10	0	0.00115703
Nodularia	NA	10	0	0.00115703
Oxobacter	NA	10	0	0.00115703
Parapedobacter	NA	10	0	0.00115703
Pelosinus	NA	10	0	0.00115703
Planococcus	NA	10	0	0.00115703
Porphyromonadaceae_bacterium_JN18_A62_G*	NA	10	0	0.00115703
Rhodopseudomonas	NA	10	0	0.00115703
Roseibacillus	NA	10	0	0.00115703
rumen_bacterium_7/94-26	NA	10	0	0.00115703
rumen_bacterium_R4_91_51	NA	10	0	0.00115703
Spirochaeta	NA	10	0	0.00115703
Sporosarcina	NA	10	0	0.00115703
swine_fecal_bacterium_FPC53	NA	10	0	0.00115703
swine_fecal_bacterium_RF1A-Xyl7	NA	10	0	0.00115703
swine_fecal_bacterium_SD-Pec7	NA	10	0	0.00115703
swine_manure_pit_bacterium_PPC28	NA	10	0	0.00115703
swine_manure_pit_bacterium_PPC43	NA	10	0	0.00115703
Symbiobacterium	NA	10	0	0.00115703
Tepidibacter	NA	10	0	0.00115703
Thalassospira	NA	10	0	0.00115703
Thermaerobacter	NA	10	0	0.00115703
Thermoanaerobacterium	NA	10	0	0.00115703
Thermotoga	NA	10	0	0.00115703
Thiobacillus	NA	10	0	0.00115703
unidentified_eubacterium_clone_BSV27	NA	10	0	0.00115703
Virgibacillus	NA	10	0	0.00115703
Acholeplasma	NA	10	0	0.000578516
actinobacterium_S-N(0)-21A	NA	10	0	0.000578516
actinobacterium_WJ25	NA	10	0	0.000578516
Actinomadura	NA	10	0	0.000578516
Agrococcus	NA	10	0	0.000578516
Agromyces	NA	10	0	0.000578516
Alcanivorax	NA	10	0	0.000578516
alpha_proteobacterium_ANRB6-1	NA	10	0	0.000578516
alpha_proteobacterium_BAL199	NA	10	0	0.000578516
alpha_proteobacterium_D16	NA	10	0	0.000578516
alpha_proteobacterium_JE013	NA	10	0	0.000578516
alpha_proteobacterium_pACH79	NA	10	0	0.000578516
alpha_proteobacterium_SK50-2	NA	10	0	0.000578516
Alteromonadales_bacterium_HD-O-03-15	NA	10	0	0.000578516
Alvinella_pompejana_epibiont	NA	10	0	0.000578516
Amycolatopsis	NA	10	0	0.000578516
Anaeroarcus	NA	10	0	0.000578516
Anaerobacter	NA	10	0	0.000578516
anaerobic_bacterium_A110	NA	10	0	0.000578516
anaerobic_bacterium_A122	NA	10	0	0.000578516
anaerobic_bacterium_A128	NA	10	0	0.000578516
anaerobic_bacterium_A129	NA	10	0	0.000578516
anaerobic_bacterium_ANA_No.33	NA	10	0	0.000578516
anaerobic_bacterium_ANA_No.37	NA	10	0	0.000578516
anaerobic_bacterium_B109	NA	10	0	0.000578516
anaerobic_bacterium_B119	NA	10	0	0.000578516
anaerobic_bacterium_B123	NA	10	0	0.000578516
anaerobic_bacterium_B141	NA	10	0	0.000578516
anaerobic_bacterium_B156	NA	10	0	0.000578516
anaerobic_bacterium_F4/B-1	NA	10	0	0.000578516
anaerobic_bacterium_S1	NA	10	0	0.000578516
anaerobic_bacterium_S21	NA	10	0	0.000578516
anaerobic_bacterium_S22	NA	10	0	0.000578516
anaerobic_bacterium_U84	NA	10	0	0.000578516
Anaerobranca	NA	10	0	0.000578516
Anaerocellum	NA	10	0	0.000578516
Anaerophaga	NA	10	0	0.000578516
Anaerovibrio	NA	10	0	0.000578516
Anaerovorax	NA	10	0	0.000578516
Antarctic_bacterium_R-7687	NA	10	0	0.000578516
Antarctic_seawater_bacterium_Bsw10178	NA	10	0	0.000578516
Aquamonas	NA	10	0	0.000578516
aquatic_bacterium_R1-B21	NA	10	0	0.000578516
aquatic_bacterium_R1-B8	NA	10	0	0.000578516
aquatic_bacterium_STS_R2A_13	NA	10	0	0.000578516
Arctic_bacterium_NP26	NA	10	0	0.000578516
arsenic_resistant_soil_bacterium_7-04	NA	10	0	0.000578516
Azohydromonas	NA	10	0	0.000578516
Azospira	NA	10	0	0.000578516
Bacillaceae_bacterium_CAa134	NA	10	0	0.000578516
Bacillaceae_bacterium_HP38	NA	10	0	0.000578516
Bacillaceae_bacterium_JAM-FM2601	NA	10	0	0.000578516
Bacillales_bacterium_BPC-C1/20-4	NA	10	0	0.000578516
Bacillales_bacterium_CCUG_49712	NA	10	0	0.000578516
bacterium_070507-OL-KR40-SRB_1-0_1000x_-1A	NA	10	0	0.000578516
bacterium_131	NA	10	0	0.000578516
bacterium_1A5	NA	10	0	0.000578516
bacterium_1C2	NA	10	0	0.000578516
bacterium_1C3	NA	10	0	0.000578516
bacterium_26-4b2	NA	10	0	0.000578516
bacterium_2BP-7	NA	10	0	0.000578516
bacterium_2RO3	NA	10	0	0.000578516
bacterium_3A3a	NA	10	0	0.000578516
bacterium_3B3	NA	10	0	0.000578516
bacterium_B1(2008)	NA	10	0	0.000578516
bacterium_B1C2-2	NA	10	0	0.000578516
bacterium_B1C2-6	NA	10	0	0.000578516
bacterium_b1cb40	NA	10	0	0.000578516
bacterium_B3C1-6	NA	10	0	0.000578516
bacterium_btn_7d-3	NA	10	0	0.000578516
bacterium_C26	NA	10	0	0.000578516
bacterium_C29	NA	10	0	0.000578516
bacterium_C32	NA	10	0	0.000578516
bacterium_CCSD_DF2030_Ag37_isolate_2	NA	10	0	0.000578516
bacterium_CWISO17	NA	10	0	0.000578516
bacterium_DR2A-55G17	NA	10	0	0.000578516
bacterium_Ellin5113	NA	10	0	0.000578516
bacterium_Ellin5235	NA	10	0	0.000578516
bacterium_Ellin5241	NA	10	0	0.000578516
bacterium_Ellin6051	NA	10	0	0.000578516
bacterium_FK14	NA	10	0	0.000578516
bacterium_G6	NA	10	0	0.000578516
bacterium_ic1337	NA	10	0	0.000578516
bacterium_ID4389	NA	10	0	0.000578516
bacterium_K3	NA	10	0	0.000578516
bacterium_L200B.638	NA	10	0	0.000578516
bacterium_L4M2_1-9	NA	10	0	0.000578516
bacterium_MF_isolate_16	NA	10	0	0.000578516
bacterium_MF_isolate_8	NA	10	0	0.000578516
bacterium_ML2-2	NA	10	0	0.000578516
bacterium_N159G.623	NA	10	0	0.000578516
bacterium_OVA10	NA	10	0	0.000578516
Bacterium_PE_IPFFB6	NA	10	0	0.000578516
bacterium_Phenol-4	NA	10	0	0.000578516
bacterium_Q33	NA	10	0	0.000578516
bacterium_RBS4-49	NA	10	0	0.000578516
bacterium_ROME1135sa	NA	10	0	0.000578516
bacterium_ROME1139sh	NA	10	0	0.000578516
bacterium_RRP2-32	NA	10	0	0.000578516
bacterium_S4-22	NA	10	0	0.000578516
bacterium_SM_12	NA	10	0	0.000578516
bacterium_SM10-19	NA	10	0	0.000578516
bacterium_SRMC-52-3	NA	10	0	0.000578516
bacterium_str._77003	NA	10	0	0.000578516
bacterium_T292	NA	10	0	0.000578516
bacterium_Te62A	NA	10	0	0.000578516
bacterium_Te63R	NA	10	0	0.000578516
bacterium_UASWS0150	NA	10	0	0.000578516
bacterium_W132B.101	NA	10	0	0.000578516
bacterium_w3cb18	NA	10	0	0.000578516
bacterium_YE57	NA	10	0	0.000578516
Bacteroidales_genomosp._P1	NA	10	0	0.000578516
Bacteroidetes_bacterium_ARK10264	NA	10	0	0.000578516
Bacteroidetes_bacterium_CHNCT12	NA	10	0	0.000578516
Bacteroidetes_bacterium_I-116-1	NA	10	0	0.000578516
Bacteroidetes_bacterium_LYH	NA	10	0	0.000578516
Bacteroidetes_bacterium_SM55	NA	10	0	0.000578516
Bacteroidetes_bacterium_TSW03CA1B	NA	10	0	0.000578516
beta_proteobacterium_1S2.B10	NA	10	0	0.000578516
beta_proteobacterium_A-O7-18	NA	10	0	0.000578516
beta_proteobacterium_CS20	NA	10	0	0.000578516
beta_proteobacterium_Ellin7147	NA	10	0	0.000578516
beta_proteobacterium_KF034	NA	10	0	0.000578516
beta_proteobacterium_pACH94	NA	10	0	0.000578516
beta_proteobacterium_PII_GH3.2.F9	NA	10	0	0.000578516
beta_proteobacterium_RG-46	NA	10	0	0.000578516
beta_proteobacterium_Rufe9	NA	10	0	0.000578516
beta_proteobacterium_Wuba26	NA	10	0	0.000578516
beta_proteobacterium_Z30	NA	10	0	0.000578516
biocide-degrading_bacterium_C1	NA	10	0	0.000578516
Bisgaard_Taxon_10	NA	10	0	0.000578516
bovine_rumen_bacterium_niuC14	NA	10	0	0.000578516
Brachymonas	NA	10	0	0.000578516
Brasilonema	NA	10	0	0.000578516
Burkholderiaceae_bacterium_Ellin7106	NA	10	0	0.000578516
Burkholderiales_bacterium_TP129	NA	10	0	0.000578516
Burkholderiales_bacterium_TP585	NA	10	0	0.000578516
Burkholderiales_bacterium_TP635	NA	10	0	0.000578516
Caldicellulosiruptor	NA	10	0	0.000578516
Caldithrix	NA	10	0	0.000578516
Candidatus_Hemobacterium	NA	10	0	0.000578516
Candidatus_Lumbricincola	NA	10	0	0.000578516
Candidatus_Microthrix	NA	10	0	0.000578516
Carboxydocella	NA	10	0	0.000578516
Celerinatantimonas	NA	10	0	0.000578516
Chelonobacter	NA	10	0	0.000578516
Chitinibacter	NA	10	0	0.000578516
Clostridiaceae_bacterium_Aso3-CS349	NA	10	0	0.000578516
Clostridiaceae_bacterium_CAa338	NA	10	0	0.000578516
Clostridiaceae_bacterium_FH042	NA	10	0	0.000578516
Clostridiaceae_bacterium_rennanqilyf1	NA	10	0	0.000578516
Clostridium	NA	10	0	0.000578516
Comamonadaceae_bacterium_PIV-16-1	NA	10	0	0.000578516
Conexibacter	NA	10	0	0.000578516
Croceibacter	NA	10	0	0.000578516
Cryobacterium	NA	10	0	0.000578516
cyanobacterium_LS123	NA	10	0	0.000578516
Dechloromonas	NA	10	0	0.000578516
delta_proteobacterium_JS_SRB400Ace	NA	10	0	0.000578516
delta_proteobacterium_KB40D	NA	10	0	0.000578516
delta_proteobacterium_symbiont_of_Osedax_sp.	NA	10	0	0.000578516
Desmospora	NA	10	0	0.000578516
Dethiobacter	NA	10	0	0.000578516
drinking_water_bacterium_BAC-M11	NA	10	0	0.000578516
drinking_water_bacterium_OR9	NA	10	0	0.000578516
Eikenella	NA	10	0	0.000578516
Elbe_River_snow_isolate_Iso11_3	NA	10	0	0.000578516
Elbe_River_snow_isolate_Iso9_1	NA	10	0	0.000578516
Elbe_River_snow_isolate_SeqSRB5	NA	10	0	0.000578516
Emticicia	NA	10	0	0.000578516
endophytic_bacterium_WR9A	NA	10	0	0.000578516
Ensifer	NA	10	0	0.000578516
Enterobacteriaceae_bacterium_AE51	NA	10	0	0.000578516
Enterococcaceae_bacterium_7_7-03MB8	NA	10	0	0.000578516
epsilon_proteobacterium_ectosymbiont_of_Rimicaris_sp.	NA	10	0	0.000578516
Eubacterium_biforme	NA	10	0	0.000578516
Fervidicola	NA	10	0	0.000578516
Firmicutes_bacterium_EG16	NA	10	0	0.000578516
Firmicutes_bacterium_HF5	NA	10	0	0.000578516
Firmicutes_bacterium_SM22	NA	10	0	0.000578516
Flavobacteria_bacterium_HMD1033	NA	10	0	0.000578516
Flavobacteriaceae_bacterium_AKS_622	NA	10	0	0.000578516
Flavobacteriaceae_bacterium_G121102s2_3	NA	10	0	0.000578516
Flavobacteriaceae_bacterium_IMCC1758	NA	10	0	0.000578516
Flavobacteriaceae_bacterium_JC2494	NA	10	0	0.000578516
Flectobacillus	NA	10	0	0.000578516
Flexibacter	NA	10	0	0.000578516
forest_soil_bacterium_3S2.D12	NA	10	0	0.000578516
forest_soil_bacterium_4S2.C9	NA	10	0	0.000578516
Fucophilus	NA	10	0	0.000578516
Fusibacter	NA	10	0	0.000578516
gamma_proteobacterium_ASL8.1	NA	10	0	0.000578516
gamma_proteobacterium_E-292	NA	10	0	0.000578516
gamma_proteobacterium_sw-11	NA	10	0	0.000578516
Gardnerella	NA	10	0	0.000578516
glacial_ice_bacterium_MS-T3-02	NA	10	0	0.000578516
glacier_bacterium_FJI10	NA	10	0	0.000578516
glacier_ice_bacterium_sp._glbI3	NA	10	0	0.000578516
glacier_ice_bacterium_sp._glbI7	NA	10	0	0.000578516
Gluconacetobacter	NA	10	0	0.000578516
Gracilibacter	NA	10	0	0.000578516
Gram-negative_bacterium_cL10-22	NA	10	0	0.000578516
Gram-positive_iron-oxidizing_acidophile_CH2	NA	10	0	0.000578516
groundwater_biofilm_bacterium_H3	NA	10	0	0.000578516
groundwater_biofilm_bacterium_N2a	NA	10	0	0.000578516
Halobacteroides	NA	10	0	0.000578516
Halochromatium	NA	10	0	0.000578516
Haloferula	NA	10	0	0.000578516
Heliobacteriaceae_bacterium_SLH	NA	10	0	0.000578516
Herpetosiphon	NA	10	0	0.000578516
human_intestinal_firmicute_CB12	NA	10	0	0.000578516
human_intestinal_firmicute_CS32	NA	10	0	0.000578516
Hyphomicrobium	NA	10	0	0.000578516
Hyphomonas	NA	10	0	0.000578516
Ideonella	NA	10	0	0.000578516
Indibacter	NA	10	0	0.000578516
Kingella	NA	10	0	0.000578516
Kytococcus	NA	10	0	0.000578516
Laceyella	NA	10	0	0.000578516
Lachnospiraceae_bacterium_A4	NA	10	0	0.000578516
Lachnospiraceae_bacterium_DJF_B223	NA	10	0	0.000578516
Lactovum_miscens	NA	10	0	0.000578516
Leifsonia	NA	10	0	0.000578516
Leptolyngbya	NA	10	0	0.000578516
Leptotrichia	NA	10	0	0.000578516
low_G+C_Gram-positive_bacterium_M54	NA	10	0	0.000578516
Luteibacter	NA	10	0	0.000578516
marine_alpha_proteobacterium_MH-4	NA	10	0	0.000578516
marine_arctic_deep-sea_bacterium_FK8b	NA	10	0	0.000578516
marine_bacterium_13729	NA	10	0	0.000578516
marine_sponge_bacterium_LIQUIDt253	NA	10	0	0.000578516
Marinococcus	NA	10	0	0.000578516
mastodon_intestinal_bacterium_AN-12-12	NA	10	0	0.000578516
mastodon_intestinal_bacterium_AN-17-3	NA	10	0	0.000578516
Mechercharimyces	NA	10	0	0.000578516
Meiothermus	NA	10	0	0.000578516
Methylosinus	NA	10	0	0.000578516
Methyloversatilis	NA	10	0	0.000578516
Microcystis	NA	10	0	0.000578516
Microscilla	NA	10	0	0.000578516
Mitsuokella	NA	10	0	0.000578516
mixed_culture_ruminal_bacterium_PAD27	NA	10	0	0.000578516
Natranaerobius	NA	10	0	0.000578516
Neorickettsia	NA	10	0	0.000578516
nitrogen-fixing_bacterium_COL	NA	10	0	0.000578516
Nocardiaceae_bacterium_Ben-13	NA	10	0	0.000578516
Nocardiopsis	NA	10	0	0.000578516
Ochrobactrum	NA	10	0	0.000578516
Oenococcus	NA	10	0	0.000578516
Oxalobacter	NA	10	0	0.000578516
Oxalobacteraceae_bacterium_8	NA	10	0	0.000578516
Oxalobacteraceae_bacterium_CHNTR40	NA	10	0	0.000578516
Oxalobacteraceae_bacterium_KVD-unk-25	NA	10	0	0.000578516
Oxalobacteraceae_bacterium_QD1	NA	10	0	0.000578516
Paracoccus	NA	10	0	0.000578516
Paraliobacillus	NA	10	0	0.000578516
Parascardovia	NA	10	0	0.000578516
Parvimonas_micra	NA	10	0	0.000578516
Pasteurella_aerogenes_MCCM_01551	NA	10	0	0.000578516
Pasteurellaceae_bacterium_Clin29	NA	10	0	0.000578516
Pectinatus	NA	10	0	0.000578516
Pelomonas	NA	10	0	0.000578516
Pelospora	NA	10	0	0.000578516
Photorhabdus	NA	10	0	0.000578516
Planctomyces	NA	10	0	0.000578516
Plesiocystis	NA	10	0	0.000578516
Porphyrobacter	NA	10	0	0.000578516
Porphyromonadaceae_bacterium_DJF_B175	NA	10	0	0.000578516
primary_endosymbiont_of_Pedicinus_badii	NA	10	0	0.000578516
Propioniferax	NA	10	0	0.000578516
proteobacterium_BHI60-53	NA	10	0	0.000578516
proteobacterium_MS-M-38	NA	10	0	0.000578516
Pseudoalteromonadaceae_bacterium_A360	NA	10	0	0.000578516
Pseudoxanthomonas	NA	10	0	0.000578516
Rhodoferax	NA	10	0	0.000578516
Rhodovulum	NA	10	0	0.000578516
rumen_bacterium_1/9293-11A	NA	10	0	0.000578516
rumen_bacterium_R3_91_26	NA	10	0	0.000578516
Schwartzia	NA	10	0	0.000578516
secondary_symbiont_type-X_of_Acyrthosiphon_pisum	NA	10	0	0.000578516
Shewanellaceae_bacterium_ACEMC_15-2	NA	10	0	0.000578516
Shimazuella	NA	10	0	0.000578516
Simonsiella	NA	10	0	0.000578516
soil_bacterium_Cipr-S3N-M1LLLSSL-1	NA	10	0	0.000578516
soil_bacterium_Dicl-S3F-M1LLLSSL-3	NA	10	0	0.000578516
soil_bacterium_Kana-S1R-M1LLLSSL-2	NA	10	0	0.000578516
soil_bacterium_LB-P1-32	NA	10	0	0.000578516
soil_bacterium_S74D1	NA	10	0	0.000578516
Sorangium	NA	10	0	0.000578516
Sphingobacteria_bacterium_JAM-BA0302	NA	10	0	0.000578516
Sphingobacteriaceae_bacterium_Ellin6205	NA	10	0	0.000578516
Sphingobacterium-like_sp._PC1.9	NA	10	0	0.000578516
Sphingomonas	NA	10	0	0.000578516
Spiroplasma_symbiont_of_Pardosa_lugubris	NA	10	0	0.000578516
Sporolactobacillus	NA	10	0	0.000578516
Sporotalea	NA	10	0	0.000578516
Stappia	NA	10	0	0.000578516
Stilbonema_sp._associated_bacterium_4	NA	10	0	0.000578516
Stilbonema_sp._associated_bacterium_6	NA	10	0	0.000578516
Succinivibrio	NA	10	0	0.000578516
Sufflavibacter	NA	10	0	0.000578516
Sulfitobacter	NA	10	0	0.000578516
swine_fecal_bacterium_FPC22A	NA	10	0	0.000578516
swine_fecal_bacterium_FPC23A	NA	10	0	0.000578516
swine_fecal_bacterium_FPC46	NA	10	0	0.000578516
swine_fecal_bacterium_FPC54	NA	10	0	0.000578516
swine_fecal_bacterium_RF1A-Cel12	NA	10	0	0.000578516
swine_fecal_bacterium_RF2B-Pec12	NA	10	0	0.000578516
swine_fecal_bacterium_RF2C-Pec1	NA	10	0	0.000578516
swine_fecal_bacterium_SD-Cel5	NA	10	0	0.000578516
swine_manure_bacterium_37-4	NA	10	0	0.000578516
swine_manure_bacterium_RT-23A	NA	10	0	0.000578516
swine_manure_bacterium_RT-8B	NA	10	0	0.000578516
swine_manure_pit_bacterium_PPC102	NA	10	0	0.000578516
swine_manure_pit_bacterium_PPC25	NA	10	0	0.000578516
swine_manure_pit_bacterium_PPC5	NA	10	0	0.000578516
swine_manure_pit_bacterium_PPC7	NA	10	0	0.000578516
swine_manure_pit_bacterium_PPC87	NA	10	0	0.000578516
swine_manure_pit_bacterium_PPC98	NA	10	0	0.000578516
Symploca	NA	10	0	0.000578516
Synergistes	NA	10	0	0.000578516
Syntrophobotulus	NA	10	0	0.000578516
Syntrophus	NA	10	0	0.000578516
Taylorella	NA	10	0	0.000578516
Tepidimicrobium	NA	10	0	0.000578516
Tepidiphilus	NA	10	0	0.000578516
Teredinibacter	NA	10	0	0.000578516
Thermomonosporaceae_bacterium_ACTS149	NA	10	0	0.000578516
Thermovenabulum	NA	10	0	0.000578516
Thiorhodococcus	NA	10	0	0.000578516
Trichodesmium	NA	10	0	0.000578516
Tropheryma	NA	10	0	0.000578516
Tuberibacillus	NA	10	0	0.000578516
type_II_methanotroph_CSC-1	NA	10	0	0.000578516
ultramicrobacterium_str._Um1	NA	10	0	0.000578516
unidentified_Anaerocellum_group_bacteria	NA	10	0	0.000578516
unidentified_eubacterium_clone_BSV20	NA	10	0	0.000578516
unidentified_eubacterium_clone_BSV41	NA	10	0	0.000578516
unidentified_eubacterium_clone_BSV50	NA	10	0	0.000578516
unidentified_eubacterium_clone_BSV72	NA	10	0	0.000578516
unidentified_eubacterium_clone_BSV82	NA	10	0	0.000578516
unidentified_eubacterium_clone_BSV87	NA	10	0	0.000578516
unidentified_eubacterium_clone_BSV89	NA	10	0	0.000578516
Ureaplasma	NA	10	0	0.000578516
Veillonellaceae_bacterium_ADV_12/01/04-B-1195	NA	10	0	0.000578516
Verrucomicrobia_bacterium_YC6886	NA	10	0	0.000578516
Verrucomicrobiaceae_bacterium_C20_UNDR-2009	NA	10	0	0.000578516
Vogesella	NA	10	0	0.000578516
Xanthobacter	NA	10	0	0.000578516
Zymophilus	NA	10	0	0.000578516

## Sheet: Family summary
O.T.U.	pvalue_pairs	qvalues	% Cases	% Controls
Bacteroidaceae	0	0.000233645	43.9677	26.9779
UNCLASSIFIED	0	0.05	16.9076	14.2419
Enterobacteriaceae	0	0.00140187	2.35526	0.0752071
Bifidobacteriaceae	0	0.0021028	0.987261	0.144629
Pasteurellaceae	0	0.00280374	0.959768	0.182811
Streptococcaceae	0	0.00257009	0.84313	0.329176
Erysipelotrichaceae	0	0.00186916	1.11973	0.654302
Rikenellaceae	0	0.00233645	0.765648	0.442565
Eubacteriaceae	0.0001	0.00116822	3.36585	3.10316
butyrate-producing_bacterium_SSC/2	0	0.00420561	0.222446	0.0144629
Alcaligenaceae	0.0045	0.00163551	1.28636	1.1686
Clostridiales_bacterium_L2-14	0	0.00630841	0.144965	0.0671079
butyrate-producing_bacterium_T2-132	0	0.00537383	0.135801	0.0613227
mixed_culture_ruminal_bacterium_PAD156	0	0.0088785	0.113306	0.0416532
Dehalobacterium	0	0.00654206	0.110807	0.0428102
butyrate-producing_bacterium_SR1/1	0	0.00817757	0.0999758	0.0381821
Lactobacillales_bacterium_DJF_B280	0	0.0067757	0.094977	0.0352895
Clostridiales_bacterium_DJF_RP51	0	0.00864486	0.120804	0.0653723
mastodon_intestinal_bacterium_AN-22-6	0	0.00794393	0.0974764	0.0428102
Coriobacteriaceae	0.0002	0.00490654	0.148297	0.0995048
Acholeplasmataceae	0	0.00911215	0.0924777	0.0439672
Clostridiales_bacterium_AHT16	0	0.0100467	0.0616518	0.0185125
Peptococcaceae	0.0038	0.00584112	0.142466	0.104133
Desulfovibrionaceae	0.0001	0.00771028	0.0791475	0.0422317
Vibrionaceae	0	0.013785	0.0374909	0.00925626
Elbe_River_snow_isolate_9_3	0	0.0119159	0.0433229	0.0161985
butyrate-producing_bacterium_SL6/1/1	0	0.0133178	0.0333253	0.00809923
Shewanellaceae	0.0001	0.0147196	0.0291596	0.00867774
Peptostreptococcaceae	0.0095	0.0161215	0.0266602	0.0127274
butyrate-producing_bacterium_SM6/1	0.0034	0.0165888	0.0216614	0.00809923
Lactobacillales_bacterium_HY-36-1	0.0035	0.0163551	0.0183289	0.00636368
Succinivibrionaceae	0.0002	0.0203271	0.00999758	0.000578516
Moraxellaceae	0.0016	0.0214953	0.0116638	0.00231406
Paucibacter	0.0021	0.0247664	0.00583192	0
Bacteroidales_str._KB9	0.0118	0.0446262	0.000833132	0.00752071
Brevibacteriaceae	0.0048	0.0383178	0.00166626	0.0104133
Spirochaetaceae	0.0119	0.025	0.00416566	0.0138844
Thermoanaerobacteraceae	0.0058	0.0273364	0.00333253	0.0133059
bacterium_Iso11_2	0.0015	0.0266355	0.00499879	0.0185125
butyrate-producing_bacterium_A2-232	0.0168	0.0179907	0.0183289	0.0335539
butyrate-producing_bacterium_SR1/5	0.0004	0.0257009	0.00583192	0.0231406
butyrate-producing_bacterium_L1-93	0.0007	0.0186916	0.0158295	0.0376036
Oxalobacteraceae	0.0002	0.0228972	0.00999758	0.0318184
Paenibacillaceae	0.0068	0.0123832	0.0324921	0.054959
Staphylococcaceae	0.0002	0.0207944	0.0116638	0.0341325
butyrate-producing_bacterium_A2-231	0.001	0.0158879	0.0291596	0.0561161
butyrate-producing_bacterium_M104/1	0	0.0196262	0.0141632	0.0457028
Clostridiales_bacterium_80/3	0	0.0156542	0.0233277	0.0590087
butyrate-producing_bacterium_L2-50	0	0.0172897	0.024994	0.0607442
butyrate-producing_bacterium_L1-810	0	0.0135514	0.0266602	0.0665294
Clostridiales_bacterium_DJF_B152	0.0001	0.0107477	0.0549867	0.0966122
butyrate-producing_bacterium_SM4/1	0	0.00747664	0.0841463	0.142894
Bacillaceae	0	0.00934579	0.0708162	0.150414
Lactobacillaceae	0	0.0102804	0.0674837	0.169505
Clostridiales_Family_XIII._Incertae_Sedis	0	0.0268692	0.00499879	0.124381
butyrate-producing_bacterium_ART55/1	0	0.0114486	0.0574861	0.188596
Oscillospiraceae	0	0.00607477	0.10914	0.25339
butyrate-producing_bacterium_L1-952	0	0.017757	0.0174958	0.19496
Burkholderiales_bacterium_Smarlab_3302047	0	0.0205607	0.0149964	0.195538
butyrate-producing_bacterium_M50/1	0	0.0140187	0.0333253	0.238927
Clostridiaceae	0.0049	0.000700935	5.85275	6.10508
butyrate-producing_bacterium_M21/2	0	0.0046729	0.219114	0.558847
butyrate-producing_bacterium_SS2/1	0	0.00514019	0.155796	0.566367
Fusobacteriaceae	0	0.00443925	0.264936	0.679757
Clostridiales_bacterium_A2-162	0	0.00841121	0.102475	0.519508
bacterium_08.96.4	0	0.00560748	0.141632	0.562318
Veillonellaceae	0	0.00303738	0.656508	1.09397
Verrucomicrobiaceae	0	0.0252336	0.00416566	0.509094
Lachnospiraceae	0	0.000934579	5.20791	6.35384
Porphyromonadaceae	0	0.00373832	0.415733	2.88795
Ruminococcaceae	0	0.00046729	9.05115	14.1233
Prevotellaceae	0	0.00350467	0.479884	10.7673
Microbacteriaceae	0.0213	0.0343458	0.00166626	0.00809923
Exiguobacterium	0.023	0.0348131	0.00166626	0.00867774
Methylophilaceae	0.0243	0.0271028	0.00499879	0.0138844
Enterobacteriales_bacterium_LBRN-NC18	0.0283	0.0308411	0.00333253	0
Pasteuriaceae	0.0307	0.0149533	0.0266602	0.0428102
butyrate-producing_bacterium_M62/1	0.0375	0.00397196	0.284931	0.329176
Epulopiscium	0.0472	0.014486	0.024994	0.0393391
Leuconostocaceae	0.0481	0.0212617	0.0116638	0.0219836
Bacteroidales_str._KB12	0.0556	0.0462617	0.000833132	0.00520665
Victivallaceae	0.0687	0.0299065	0.0024994	0
Halomonadaceae	0.0689	0.0331776	0.0024994	0
Enterococcaceae	0.0696	0.0151869	0.0266602	0.0161985
butyrate-producing_bacterium_A2-207	0.0848	0.021028	0.0116638	0.0208266
Clostridiales_bacterium_DJF_VP35	0.0871	0.0130841	0.0366578	0.0248762
Clostridiales_bacterium_JN18_V41_S	0.0884	0.0364486	0.00166626	0.00636368
mixed_culture_ruminal_bacterium_PAD193	0.0905	0.0415888	0.000833132	0.00462813
Hydrogenophilaceae	0.0908	0.0492991	0.000833132	0.00462813
Caulobacteraceae	0.093	0.0422897	0.000833132	0.00462813
Elbe_River_snow_isolate_Iso15_5	0.094	0.0413551	0.000833132	0.00462813
Gemella	0.1072	0.0189252	0.0149964	0.00809923
Clostridiales_bacterium_DJF_CP67	0.1206	0.0154206	0.0258271	0.016777
Xanthomonadaceae	0.1219	0.0334112	0.0024994	0.00694219
Acetobacteraceae	0.1252	0.0182243	0.0133301	0.0214051
Rhizobiaceae	0.1366	0.0350467	0.00166626	0.00578516
Corynebacteriaceae	0.139	0.0376168	0.00166626	0.00578516
butyrate-producing_bacterium_L2-7	0.14	0.011215	0.0641512	0.0503309
Anaplasmataceae	0.1459	0.0128505	0.0374909	0.0497524
Campylobacteraceae	0.1675	0.0390187	0.00166626	0
Clostridiales_bacterium_r14	0.1706	0.0369159	0.00166626	0
Burkholderiaceae	0.1755	0.0126168	0.0341584	0.0451243
butyrate-producing_bacterium_A2-166	0.1789	0.0170561	0.0216614	0.0306614
Acidithiobacillaceae	0.2124	0.035514	0.00166626	0.00462813
Clostridiales_bacterium_Yos55	0.2142	0.0366822	0.00166626	0.00462813
Sphingobacteriaceae	0.222	0.0184579	0.0149964	0.0214051
Cellulomonadaceae	0.2352	0.028271	0.00333253	0.00115703
Nitrosomonadaceae	0.2364	0.0292056	0.00333253	0.00115703
bacterium_AN1045	0.2471	0.0275701	0.00416566	0.00809923
Clostridiales_bacterium_80/4	0.2476	0.0254673	0.00583192	0.00289258
Neisseriaceae	0.2498	0.0238318	0.00666506	0.0115703
Rhodobacteraceae	0.2532	0.0490654	0.000833132	0.0034711
Pseudomonadaceae	0.2623	0.0219626	0.012497	0.00809923
Micromonosporaceae	0.3102	0.0296729	0.0024994	0.000578516
bacterium_PM51	0.3103	0.032243	0.0024994	0.000578516
Piscirickettsiaceae	0.3108	0.0301402	0.0024994	0.000578516
Mycobacteriaceae	0.3229	0.0336449	0.00166626	0.00404961
Francisellaceae	0.3247	0.0373832	0.00166626	0.00404961
Methylobacteriaceae	0.3258	0.0385514	0.00166626	0.00404961
Carnobacteriaceae	0.3262	0.0193925	0.0149964	0.0202481
butyrate-producing_bacterium_A1-86	0.3648	0.010514	0.0508211	0.0428102
Clostridiales_bacterium_DJF_VP48	0.3761	0.0116822	0.0574861	0.0665294
Planococcaceae	0.3804	0.0320093	0.0024994	0.00520665
Thermoanaerobacterales_Family_III._Incertae_Sedis	0.3839	0.0329439	0.0024994	0.00462813
Bradyrhizobiaceae	0.3864	0.0345794	0.0024994	0.00462813
Nostocaceae	0.3868	0.0315421	0.0024994	0.00462813
butyrate-producing_bacterium_A2-175	0.3891	0.0191589	0.0141632	0.0185125
Aeromonadaceae	0.4054	0.0242991	0.00583192	0.0034711
Elbe_River_snow_isolate_Iso15_4	0.4057	0.0488318	0.000833132	0
Saprospiraceae	0.4067	0.0404206	0.000833132	0
Planktothrix	0.4075	0.0408879	0.000833132	0
Oscillatoria	0.408	0.0483645	0.000833132	0
Frankiaceae	0.4083	0.046028	0.000833132	0
Bacillales_bacterium_Gsoil_1105	0.4084	0.0411215	0.000833132	0
Arthronema	0.4089	0.0406542	0.000833132	0
Micrococcineae_bacterium_ASTYA1	0.4098	0.0478972	0.000833132	0
Ferrimonadaceae	0.4102	0.0495327	0.000833132	0
Enterobacteriales_bacterium_LBRN-NC07	0.4103	0.0457944	0.000833132	0
Thermoactinomycetaceae	0.4104	0.0439252	0.000833132	0.00289258
Procabacteriaceae	0.4107	0.0434579	0.000833132	0
Moritellaceae	0.4108	0.0497664	0.000833132	0
Phyllobacteriaceae	0.4108	0.0425234	0.000833132	0
Aquabacterium	0.4109	0.0471963	0.000833132	0
Sanguibacteraceae	0.4111	0.0481308	0.000833132	0
haloalkaliphilic_bacterium_EMB4	0.4123	0.0448598	0.000833132	0
Elbe_River_snow_isolate_Iso11_1	0.4127	0.0485981	0.000833132	0
Dietziaceae	0.4133	0.0443925	0.000833132	0
Bacteroidales_str._KB13	0.4151	0.0401869	0.000833132	0.00289258
bacterium_RC36	0.4795	0.0233645	0.00749819	0.00520665
Heliobacteriaceae	0.4847	0.0359813	0.00166626	0.0034711
Clostridiales_bacterium_DJF_B034	0.4891	0.0378505	0.00166626	0.0034711
Micrococcaceae	0.5082	0.0221963	0.0108307	0.0138844
Marinilabiaceae	0.5386	0.0310748	0.0024994	0.00404961
Bacteroidales_str._KB10	0.5421	0.0317757	0.0024994	0.00404961
Myxococcaceae	0.5672	0.0338785	0.00166626	0.000578516
Spirillaceae	0.5696	0.0397196	0.00166626	0.000578516
Brucellaceae	0.5721	0.0371495	0.00166626	0.000578516
Rubrivivax	0.5746	0.0352804	0.00166626	0.000578516
butyrate-producing_bacterium_L2-12	0.5779	0.0294393	0.00333253	0.00520665
Comamonadaceae	0.5859	0.0175234	0.0208283	0.0173555
Flexibacteraceae	0.5892	0.0240654	0.00583192	0.00404961
Clostridiales_bacterium_oral_taxon_093	0.6459	0.0441589	0.000833132	0.00173555
Clostridiales_Family_XVIII._Incertae_Sedis	0.6466	0.0476636	0.000833132	0.00173555
Aerococcaceae	0.6694	0.0235981	0.00666506	0.00867774
Mycoplasmataceae	0.6704	0.0109813	0.0466554	0.0509094
Actinomycetaceae	0.6799	0.0231308	0.00916445	0.00752071
Leptospiraceae	0.6924	0.0324766	0.0024994	0.00173555
Rhodospirillaceae	0.6927	0.0303738	0.0024994	0.00173555
Chromatiaceae	0.695	0.0313084	0.0024994	0.00173555
butyrate-producing_bacterium_L2-21	0.7491	0.00700935	0.129135	0.134216
Blautia	0.7625	0.00327103	0.637346	0.62769
mixed_culture_ruminal_bacterium_PAD196	0.7712	0.0306075	0.00333253	0.00462813
Thiomonas	0.7724	0.0280374	0.00333253	0.00462813
Nocardiaceae	0.7753	0.028972	0.00333253	0.00404961
Thermotogaceae	0.8057	0.0245327	0.00499879	0.00636368
Howardella	0.8082	0.0264019	0.00499879	0.00578516
Rhodocyclaceae	0.8491	0.0224299	0.00999758	0.00867774
Clostridiales_Family_XI._Incertae_Sedis	0.8675	0.0200935	0.012497	0.0133059
Clostridiales_bacterium_HAW-EB17	0.8785	0.0198598	0.0158295	0.0144629
butyrate-producing_bacterium_SS3/4	0.8959	0.0168224	0.0216614	0.0202481
butyrate-producing_bacterium_L1-81	0.9105	0.00724299	0.0858126	0.0838849
butyrate-producing_bacterium_YE53	0.9223	0.0142523	0.0341584	0.0341325
Flavobacteriaceae	0.9331	0.0121495	0.0391572	0.0404961
butyrate-producing_bacterium_SL7/1	0.967	0.00981308	0.063318	0.0636368
butyrate-producing_bacterium_T1-815	0.9976	0.00957944	0.0524873	0.0532235
Alteromonadaceae	1	0.0285047	0.00333253	0.00289258
anaerobic_bacterium_Glu3	1	0.038785	0.00166626	0.00115703
bacterium_HY-42-22	1	0.046729	0.000833132	0.000578516
bacterium_PS7	1	0.0392523	0.00166626	0.00173555
bacterium_TMB39	1	0.0261682	0.00499879	0.00520665
butyrate-producing_bacterium_T2-145	1	0.021729	0.0133301	0.0133059
Clostridiales_bacterium_1-IIB	1	0.0450935	0.000833132	0.00115703
Clostridiales_bacterium_r41	1	0.0453271	0.000833132	0.000578516
Clostridiales_Family_XIV._Incertae_Sedis	1	0.036215	0.00166626	0.00231406
Clostridiales_Family_XVII._Incertae_Sedis	1	0.0418224	0.000833132	0.00115703
Cyclobacteriaceae	1	0.0464953	0.000833132	0.000578516
Fibrobacteraceae	1	0.0474299	0.000833132	0.000578516
Halanaerobiaceae	1	0.0420561	0.000833132	0.00115703
Hyphomicrobiaceae	1	0.0455607	0.000833132	0.000578516
Hyphomonadaceae	1	0.042757	0.000833132	0.000578516
Idiomarinaceae	1	0.0341121	0.00166626	0.00115703
Lactobacillaceae_bacterium_DJF_003	1	0.039486	0.00166626	0.00231406
mixed_culture_ruminal_bacterium_PAD160	1	0.0287383	0.00416566	0.00404961
Propionibacteriaceae	1	0.0259346	0.00416566	0.0034711
Pseudoalteromonadaceae	1	0.0278037	0.00416566	0.0034711
Pseudonocardiaceae	1	0.0399533	0.000833132	0.000578516
Sphingomonadaceae	1	0.0429907	0.000833132	0.00115703
Spiroplasmataceae	1	0.0380841	0.00166626	0.00115703
Streptomycetaceae	1	0.0226636	0.00833132	0.00867774
Synergistaceae	1	0.0436916	0.000833132	0.000578516
Syntrophomonadaceae	1	0.0327103	0.0024994	0.00289258
Thiotrichaceae	1	0.0357477	0.00166626	0.00231406
Acidobacteriaceae	NA	10	0	0.000578516
Alcanivoracaceae	NA	10	0	0.000578516
Alicyclobacillaceae	NA	10	0	0.00462813
Alteromonadales_bacterium_HD-O-03-15	NA	10	0	0.000578516
Anaerocellum	NA	10	0	0.000578516
Anaerolinaceae	NA	10	0	0.00115703
arsenic_resistant_soil_bacterium_7-04	NA	10	0	0.000578516
Bacillales_bacterium_BPC-C1/20-4	NA	10	0	0.000578516
Bacillales_bacterium_CCUG_49712	NA	10	0	0.000578516
bacterium_Ellin309	NA	10	0	0.000578516
Bacteroidales_bacterium_DJF_B268	NA	10	0	0.00115703
Bacteroidales_bacterium_JN18_V15_G	NA	10	0	0.0219836
Bacteroidales_genomosp._P1	NA	10	0	0.000578516
Bacteroidales_str._KB1	NA	10	0	0.0115703
Bacteroidales_str._KB11	NA	10	0	0.00231406
Bartonellaceae	NA	10	0	0.00173555
Beijerinckiaceae	NA	10	0	0.00115703
Blattabacteriaceae	NA	10	0	0.00173555
Burkholderiales_bacterium_TP129	NA	10	0	0.000578516
Burkholderiales_bacterium_TP585	NA	10	0	0.000578516
Burkholderiales_bacterium_TP635	NA	10	0	0.000578516
butyrate-producing_bacterium_L2-10	NA	10	0	0.00289258
butyrate-producing_bacterium_SM7/11	NA	10	0	0.00173555
Candidatus_Azobacteroides	NA	10	0	0.00173555
Candidatus_Sulcia	NA	10	0	0.00289258
Candidatus_Symbiothrix	NA	10	0	0.00115703
Celerinatantimonadaceae	NA	10	0	0.000578516
Chitinophaga	NA	10	0	0.000578516
Chlamydiaceae	NA	10	0	0.000578516
Chlorobiaceae	NA	10	0	0.00173555
Chlorogloeopsis	NA	10	0	0.00115703
Clostridiales_Family_XII._Incertae_Sedis	NA	10	0	0.000578516
Clostridiales_Family_XVI._Incertae_Sedis	NA	10	0	0.000578516
Conexibacteraceae	NA	10	0	0.000578516
Coxiellaceae	NA	10	0	0.00173555
Cyanobacterium	NA	10	0	0.000578516
Cyanobium	NA	10	0	0.000578516
Cyanothece	NA	10	0	0.00115703
Deinococcaceae	NA	10	0	0.00173555
Dermacoccaceae	NA	10	0	0.000578516
Desulfohalobiaceae	NA	10	0	0.000578516
Desulfomicrobiaceae	NA	10	0	0.00231406
Desulfurellaceae	NA	10	0	0.000578516
Desulfuromonadaceae	NA	10	0	0.000578516
Ectothiorhodospiraceae	NA	10	0	0.000578516
Elbe_River_snow_isolate_Iso11_3	NA	10	0	0.000578516
Elbe_River_snow_isolate_Iso9_1	NA	10	0	0.000578516
Erythrobacteraceae	NA	10	0	0.000578516
Flammeovirgaceae	NA	10	0	0.000578516
Geobacteraceae	NA	10	0	0.00115703
Gloeocapsa	NA	10	0	0.00115703
Graciibacteraceae	NA	10	0	0.00115703
Halobacteroidaceae	NA	10	0	0.000578516
Helicobacteraceae	NA	10	0	0.00173555
Herpetosiphonaceae	NA	10	0	0.000578516
Ideonella	NA	10	0	0.000578516
Jonesiaceae	NA	10	0	0.00289258
Kineosporiaceae	NA	10	0	0.000578516
Lactobacillales_bacterium_HY-45-2	NA	10	0	0.00115703
Leptolyngbya	NA	10	0	0.00231406
Leptothrix	NA	10	0	0.00115703
Listeriaceae	NA	10	0	0.00289258
Lumbricoplasmataceae	NA	10	0	0.000578516
mastodon_intestinal_bacterium_AN-12-12	NA	10	0	0.000578516
mastodon_intestinal_bacterium_AN-17-3	NA	10	0	0.000578516
Metabacterium	NA	10	0	0.000578516
Methylococcaceae	NA	10	0	0.00173555
Methylocystaceae	NA	10	0	0.00115703
Microcoleus	NA	10	0	0.00231406
Microcystis	NA	10	0	0.000578516
Mitsuaria	NA	10	0	0.00115703
mixed_culture_ruminal_bacterium_PAD27	NA	10	0	0.000578516
Nannocystaceae	NA	10	0	0.00115703
Natranaerobiaceae	NA	10	0	0.000578516
Nocardioidaceae	NA	10	0	0.000578516
Nocardiopsaceae	NA	10	0	0.000578516
Parvularculaceae	NA	10	0	0.000578516
Phormidium	NA	10	0	0.000578516
Planctomycetaceae	NA	10	0	0.000578516
Polyangiaceae	NA	10	0	0.00115703
Prochlorococcaceae	NA	10	0	0.00115703
Promicromonosporaceae	NA	10	0	0.000578516
rumen_bacterium_YS1	NA	10	0	2.28745
Scytonemataceae	NA	10	0	0.00173555
Simkaniaceae	NA	10	0	0.00115703
Sphaerotilus	NA	10	0	0.00231406
Sporolactobacillaceae	NA	10	0	0.00173555
Symploca	NA	10	0	0.000578516
Synechococcus	NA	10	0	0.00578516
Syntrophaceae	NA	10	0	0.00173555
Teredinibacter	NA	10	0	0.000578516
Thermaceae	NA	10	0	0.00115703
Thermodesulfobiaceae	NA	10	0	0.00520665
Thermolithobacteraceae	NA	10	0	0.019091
Thermomonosporaceae	NA	10	0	0.00231406
Trichodesmium	NA	10	0	0.000578516
Tropheryma	NA	10	0	0.000578516
unidentified_Anaerocellum_group_bacteria	NA	10	0	0.000578516
Williamsiaceae	NA	10	0	0.000578516
Xanthobacteraceae	NA	10	0	0.000578516

## Sheet: Order summary
O.T.U.	pvalue_pairs	qvalues	% Cases	% Controls
Acholeplasmatales	0	0.0127451	0.0924777	0.0439672
Bacteroidales	0	0.000980392	45.6365	43.4275
Bifidobacteriales	0	0.00686275	0.987261	0.144629
Clostridiales	0	0.00196078	28.2215	36.903
Enterobacteriales	0	0.00294118	2.35943	0.0752071
Erysipelotrichales	0	0.00588235	1.11973	0.654302
Fusobacteriales	0	0.00980392	0.264936	0.679757
Lactobacillales	0	0.00490196	1.08557	0.610913
Pasteurellales	0	0.00784314	0.959768	0.182811
UNCLASSIFIED	0	0.05	16.9051	14.2419
Verrucomicrobiales	0	0.0303922	0.00416566	0.509094
Vibrionales	0	0.0186275	0.0374909	0.00925626
Coriobacteriales	0.0002	0.0107843	0.148297	0.0995048
Alteromonadales	0.0003	0.0166667	0.0399903	0.0173555
Desulfovibrionales	0.0003	0.0117647	0.0791475	0.0451243
Thermoanaerobacterales	0.0004	0.0284314	0.00583192	0.0231406
Aeromonadales	0.0013	0.0215686	0.0158295	0.00404961
Pseudomonadales	0.0061	0.0205882	0.0241608	0.0104133
Bacillales	0.0086	0.00882353	0.317423	0.376614
Actinomycetales	0.0093	0.0137255	0.0524873	0.0786782
Rhizobiales	0.023	0.0245098	0.00916445	0.0202481
Methylophilales	0.025	0.0323529	0.00499879	0.0138844
Spirochaetales	0.0386	0.0254902	0.00666506	0.0156199
Burkholderiales	0.0568	0.00392157	1.38467	1.47059
Caulobacterales	0.0895	0.0441176	0.000833132	0.00462813
Hydrogenophilales	0.0909	0.0490196	0.000833132	0.00462813
Xanthomonadales	0.1163	0.0372549	0.0024994	0.00694219
Rickettsiales	0.1459	0.0176471	0.0374909	0.0497524
Nitrosomonadales	0.172	0.0313725	0.00499879	0.00173555
Nostocales	0.1765	0.0352941	0.0024994	0.00636368
Oscillatoriales	0.1796	0.0343137	0.0024994	0.00636368
Rhodospirillales	0.1859	0.022549	0.0158295	0.0231406
Acidithiobacillales	0.2144	0.0392157	0.00166626	0.00462813
Neisseriales	0.2485	0.0264706	0.00666506	0.0115703
Oceanospirillales	0.3114	0.0362745	0.0024994	0.000578516
Rhodobacterales	0.3208	0.0401961	0.00166626	0.00404961
Procabacteriales	0.4069	0.0460784	0.000833132	0
Flavobacteriales	0.498	0.0156863	0.0391572	0.0451243
Sphingobacteriales	0.5042	0.0196078	0.0224946	0.0271903
Sphingomonadales	0.6482	0.045098	0.000833132	0.00173555
Halanaerobiales	0.6512	0.0431373	0.000833132	0.00173555
Mycoplasmatales	0.6704	0.0147059	0.0466554	0.0509094
Myxococcales	0.7081	0.0382353	0.00166626	0.00289258
Thermotogales	0.809	0.0294118	0.00499879	0.00636368
Thiotrichales	0.819	0.027451	0.00583192	0.00694219
Rhodocyclales	0.8443	0.0235294	0.00999758	0.00867774
Campylobacterales	1	0.0421569	0.00166626	0.00173555
Chromatiales	1	0.0333333	0.0024994	0.00231406
Entomoplasmatales	1	0.0411765	0.00166626	0.00115703
Fibrobacterales	1	0.0480392	0.000833132	0.000578516
Synergistales	1	0.0470588	0.000833132	0.000578516
Acidobacteriales	NA	10	0	0.000578516
Anaerolinaeles	NA	10	0	0.00115703
Celerinatantimonadaceae	NA	10	0	0.000578516
Chlamydiales	NA	10	0	0.00173555
Chlorobiales	NA	10	0	0.00173555
Chroococcales	NA	10	0	0.00983478
Deinococcales	NA	10	0	0.00173555
Desulfurellales	NA	10	0	0.000578516
Desulfuromonadales	NA	10	0	0.00173555
Herpetosiphonales	NA	10	0	0.000578516
Legionellales	NA	10	0	0.00173555
Lumbricoplasmataceae	NA	10	0	0.000578516
Methylococcales	NA	10	0	0.00173555
Natranaerobiales	NA	10	0	0.000578516
Parvularculales	NA	10	0	0.000578516
Planctomycetales	NA	10	0	0.000578516
Prochlorales	NA	10	0	0.00115703
Solirubrobacterales	NA	10	0	0.000578516
Stigonematales	NA	10	0	0.00115703
Syntrophobacterales	NA	10	0	0.00173555
Thermales	NA	10	0	0.00115703
Thermolithobacterales	NA	10	0	0.019091

## Sheet: Class summary
O.T.U.	pvalue_pairs	qvalues	% Csses	% Controls
Gammaproteobacteria	0	0.00681818	3.52415	0.332647
UNCLASSIFIED	0	0.05	16.7868	14.1384
Bacteroidia	0	0.00227273	45.6365	43.4275
Actinobacteria	0	0.0136364	1.19305	0.329754
Erysipelotrichi	0	0.0159091	1.11973	0.654302
Bacilli	0	0.0113636	1.40299	0.987527
Mollicutes	0.0009	0.0204545	0.140799	0.0977692
Deltaproteobacteria	0.008	0.0227273	0.0833132	0.0566946
Fibrobacteres	1	0.0477273	0.000833132	0.000578516
Synergistia	1	0.0454545	0.000833132	0.000578516
Acidobacteria	NA	10	0	0.000578516
Chloroflexi	NA	10	0	0.000578516
Planctomycetacia	NA	10	0	0.000578516
Anaerolineae	NA	10	0	0.00115703
Prochlorales	NA	10	0	0.00115703
Stigonematales	NA	10	0	0.00115703
Thermotogae	0.8069	0.0340909	0.00499879	0.00636368
Chlamydiae	NA	10	0	0.00173555
Chlorobia	NA	10	0	0.00173555
Epsilonproteobacteria	0.3255	0.0431818	0.00166626	0.00404961
Deinococci	NA	10	0	0.00289258
Nostocales	0.1772	0.0409091	0.0024994	0.00636368
Oscillatoriales	0.1741	0.0386364	0.0024994	0.00636368
Sphingobacteria	0.4475	0.0295455	0.0224946	0.0277688
Flavobacteria	0.4121	0.0272727	0.0391572	0.0462813
Spirochaetes	0.0367	0.0318182	0.00666506	0.0156199
Chroococcales	NA	10	0	0.00983478
Thermolithobacteria	NA	10	0	0.019091
Alphaproteobacteria	0.0007	0.025	0.06915	0.108761
Betaproteobacteria	0.0461	0.00909091	1.44465	1.53654
Fusobacteria	0	0.0181818	0.264936	0.679757
Verrucomicrobiae	0	0.0363636	0.00416566	0.509094
Clostridia	0	0.00454545	28.2315	36.9776

## Sheet: Phylum summary
O.T.U.	pvalue_pairs	qvalues	% Cases	% Controls
Actinobacteria	0	0.0138889	1.34551	0.433887
Bacteroidetes	0	0.00277778	52.9489	47.517
Cyanobacteria	0	0.025	0.0199952	0.0711575
Firmicutes	0	0.00555556	34.7591	42.8657
Fusobacteria	0	0.0166667	0.274934	0.713311
Proteobacteria	0	0.00833333	9.04531	5.7626
Tenericutes	0	0.0111111	1.5213	1.8715
Verrucomicrobia	0	0.0305556	0.00833132	0.668765
Lentisphaerae	0.0126	0.0333333	0.00416566	0
Spirochaetes	0.0333	0.0277778	0.0133301	0.0248762
Unclassified	0.0898	0.05	0.0166626	0.00925626
Deinococcus-Thermus	0.153	0.0416667	0.000833132	0.00404961
Thermotogae	0.2404	0.0222222	0.0166626	0.0231406
Acidobacteria	0.2547	0.0444444	0.000833132	0.0034711
Euryarchaeota	0.3984	0.0194444	0.0199952	0.0156199
Chlorobi	0.7075	0.0361111	0.00166626	0.00289258
Fibrobacteres	1	0.0472222	0.000833132	0.000578516
Synergistetes	1	0.0388889	0.00166626	0.00173555
Aquificae	NA	10	0	0.00115703
Chlamydiae	NA	10	0	0.00231406
Chloroflexi	NA	10	0	0.00578516
Ktedonobacteria	NA	10	0	0.000578516
Planctomycetes	NA	10	0	0.000578516
